# Supplementary material for: Transcriptome-Wide Association Studies of 81 traits in 79,294 Korean individuals
Source: Research Square preprint supplement (doi:10.21203/rs.3.rs-6417034/v1), 2025-04-17

**Supplementary Figure 1. Comparing allele frequency of SNPs in genes between GTEx-based and Korean-based GReX model**

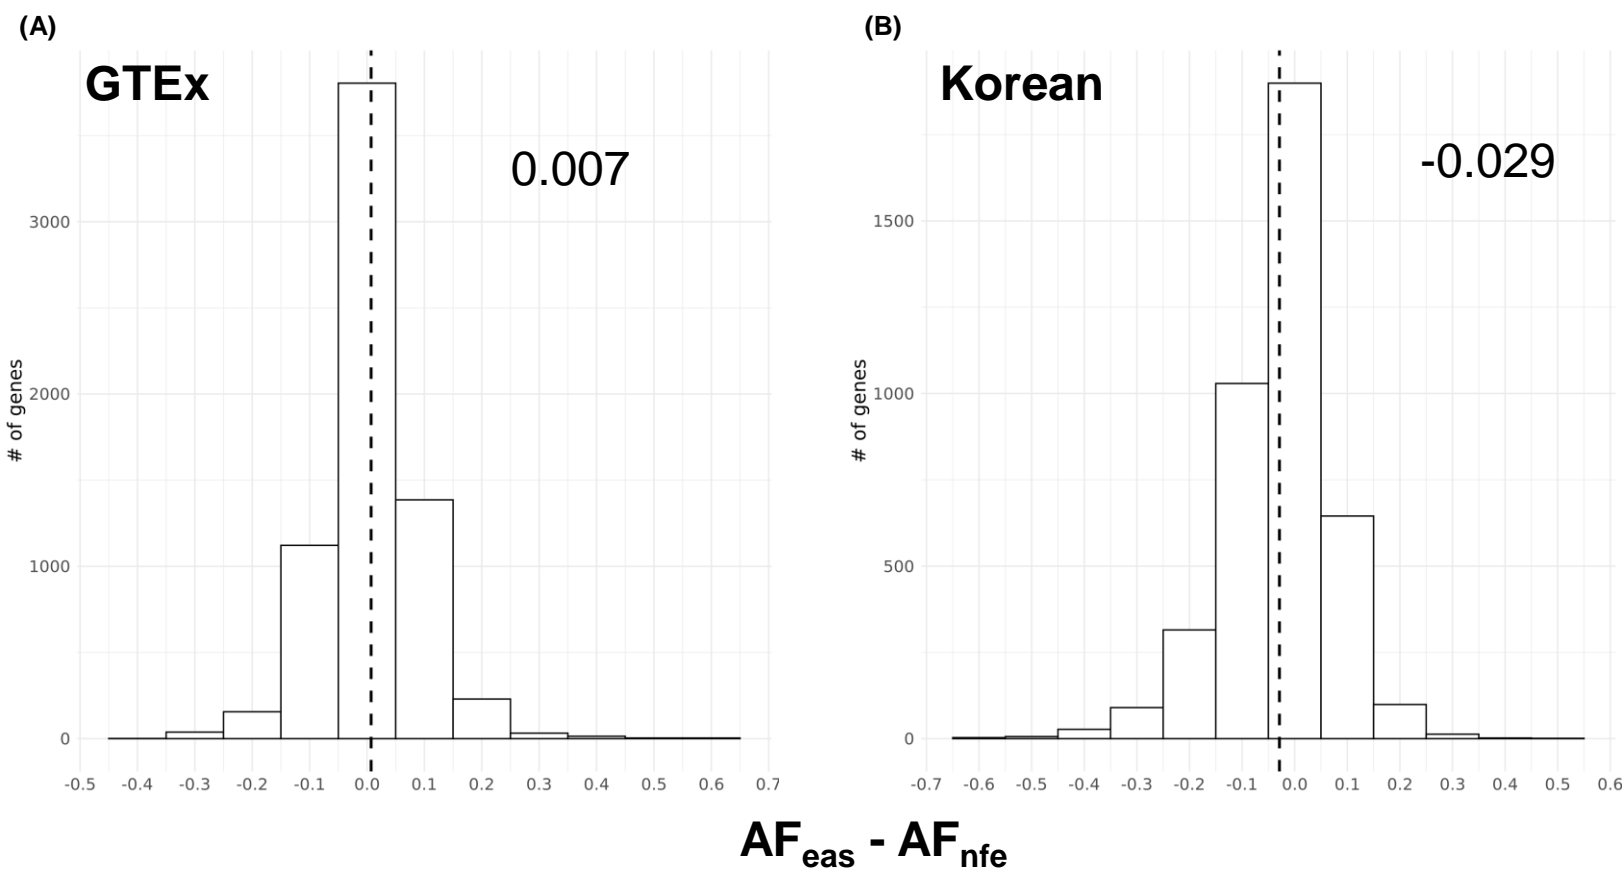

**Supplementary Figure 2. Correlation of GTEx-based predicted gene expression and Korean-based predicted gene expression**

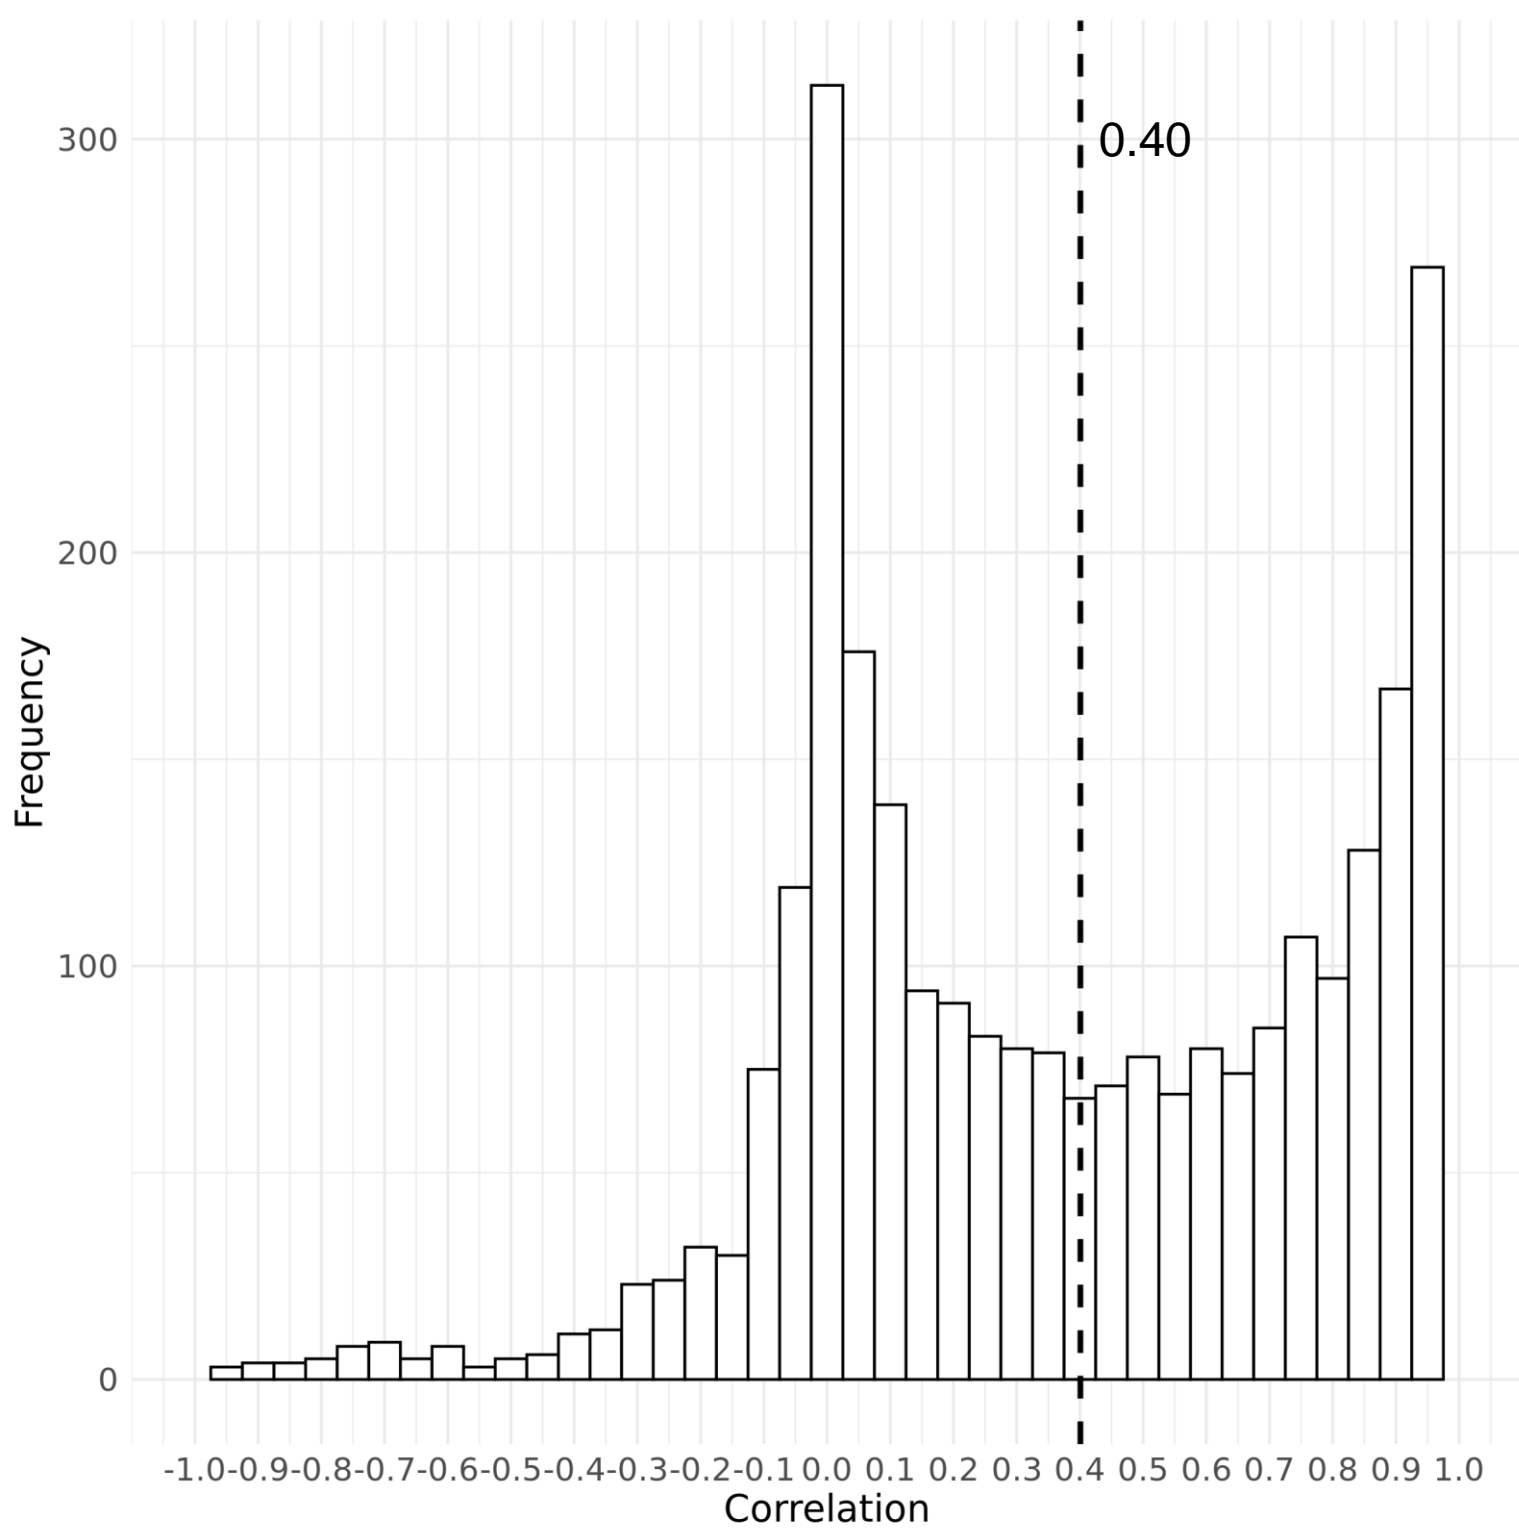

**Supplementary Figure 3. Comparing the number of significant gene-phenotype association between GTEx-based and Korean-based GReX model**

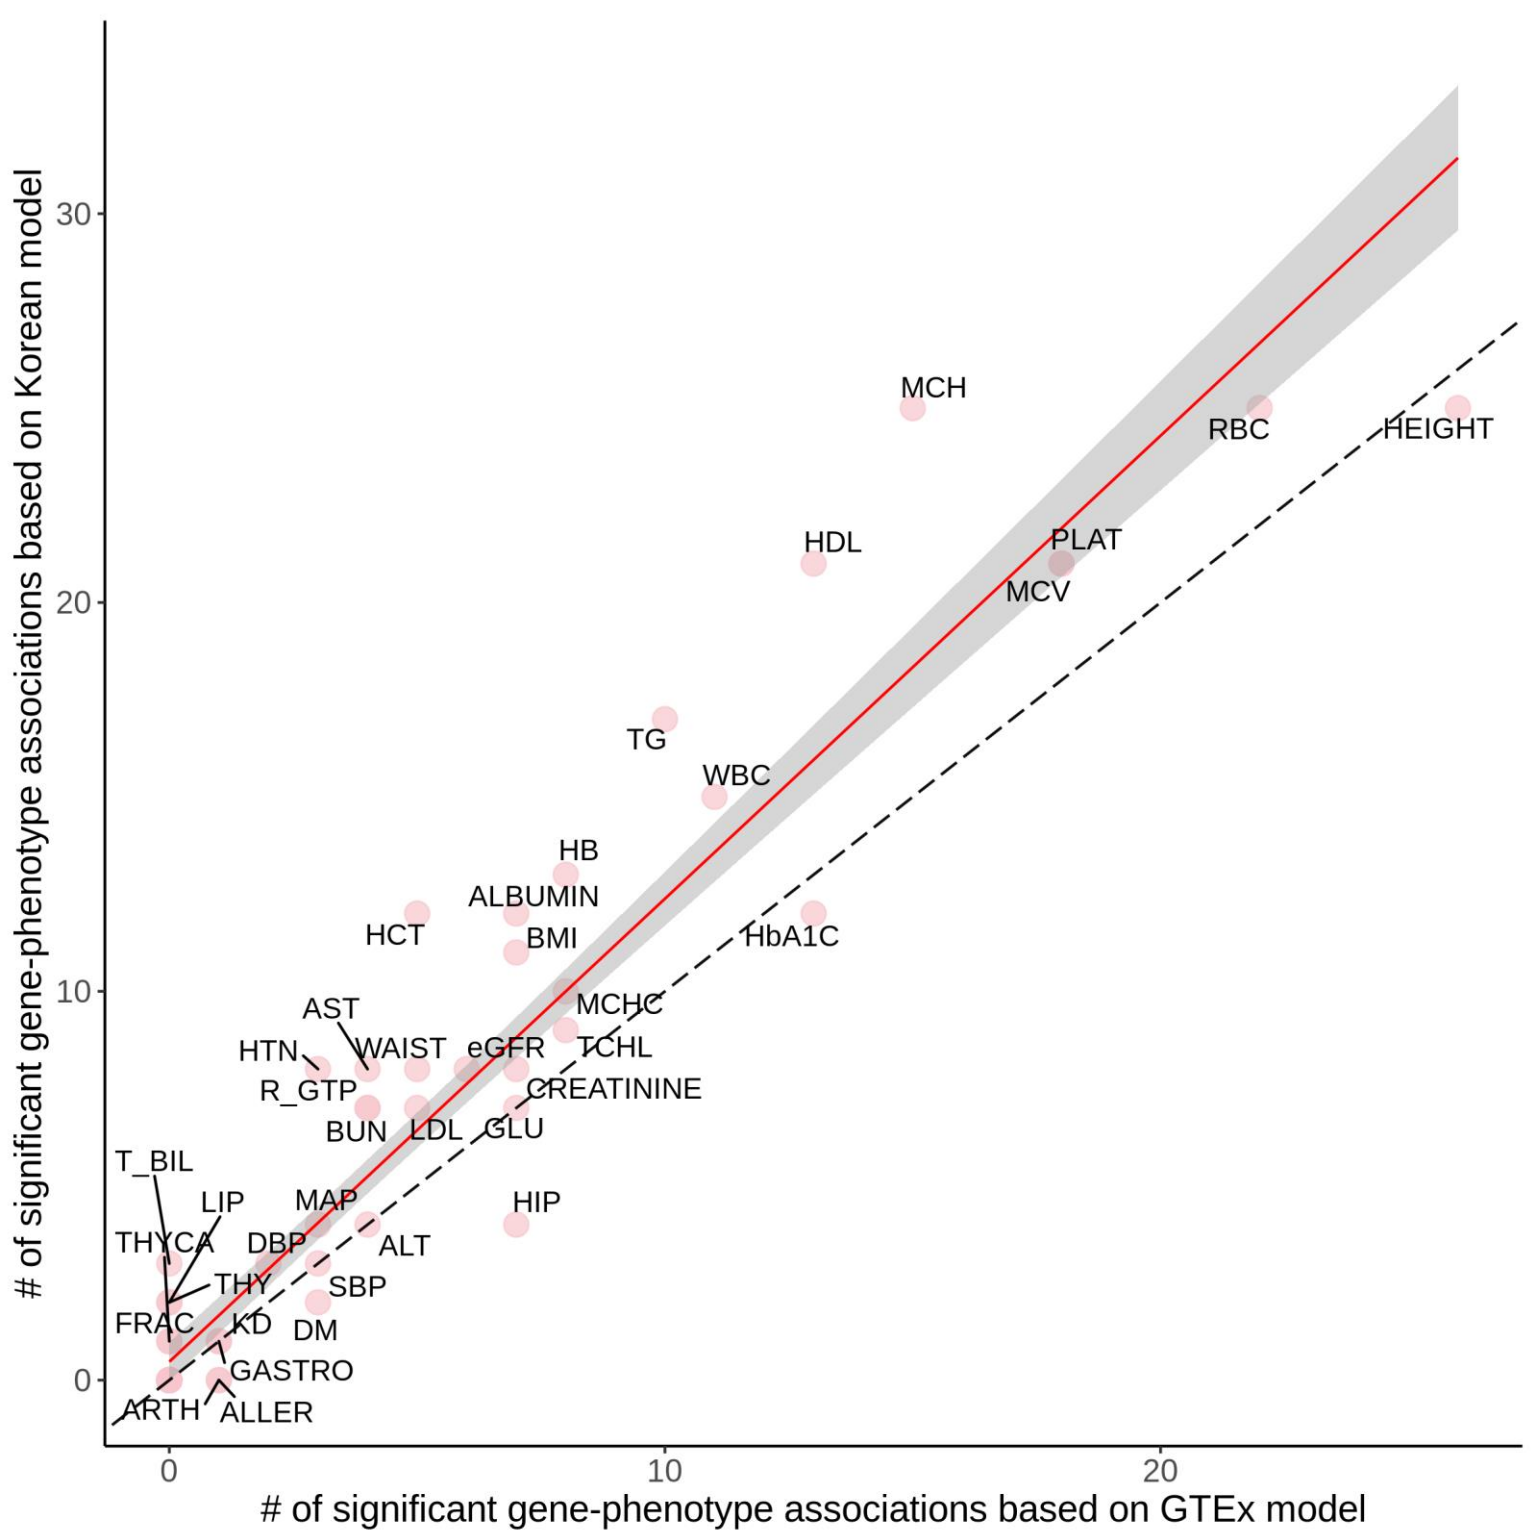

**Supplementary Figure 4. Comparing TWAS Z-score between GTEx and Korean-based model (intersected genes)**

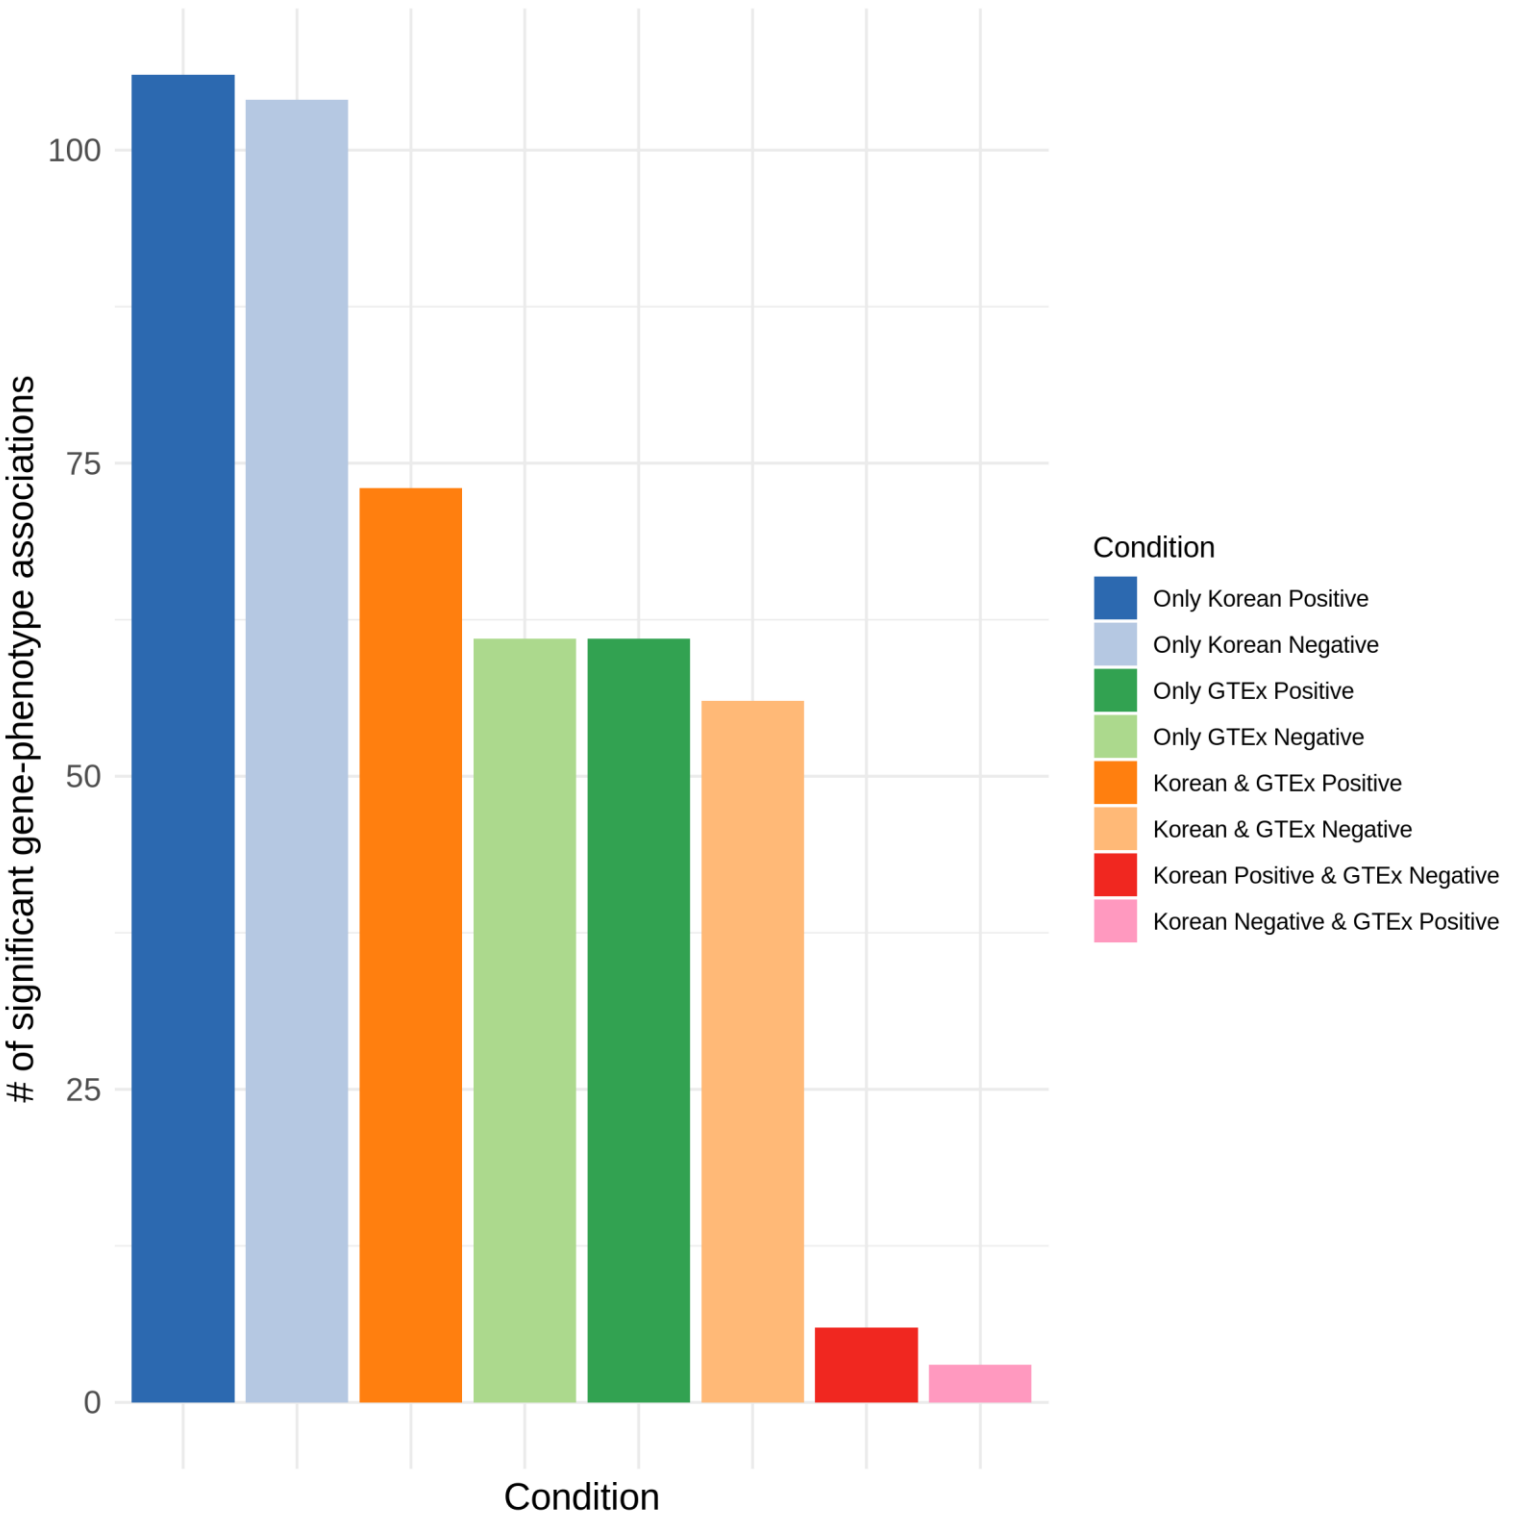

**Supplementary Figure 5. Comparing TWAS Z-scores between GTEx and Korean-based model (intersected genes)**

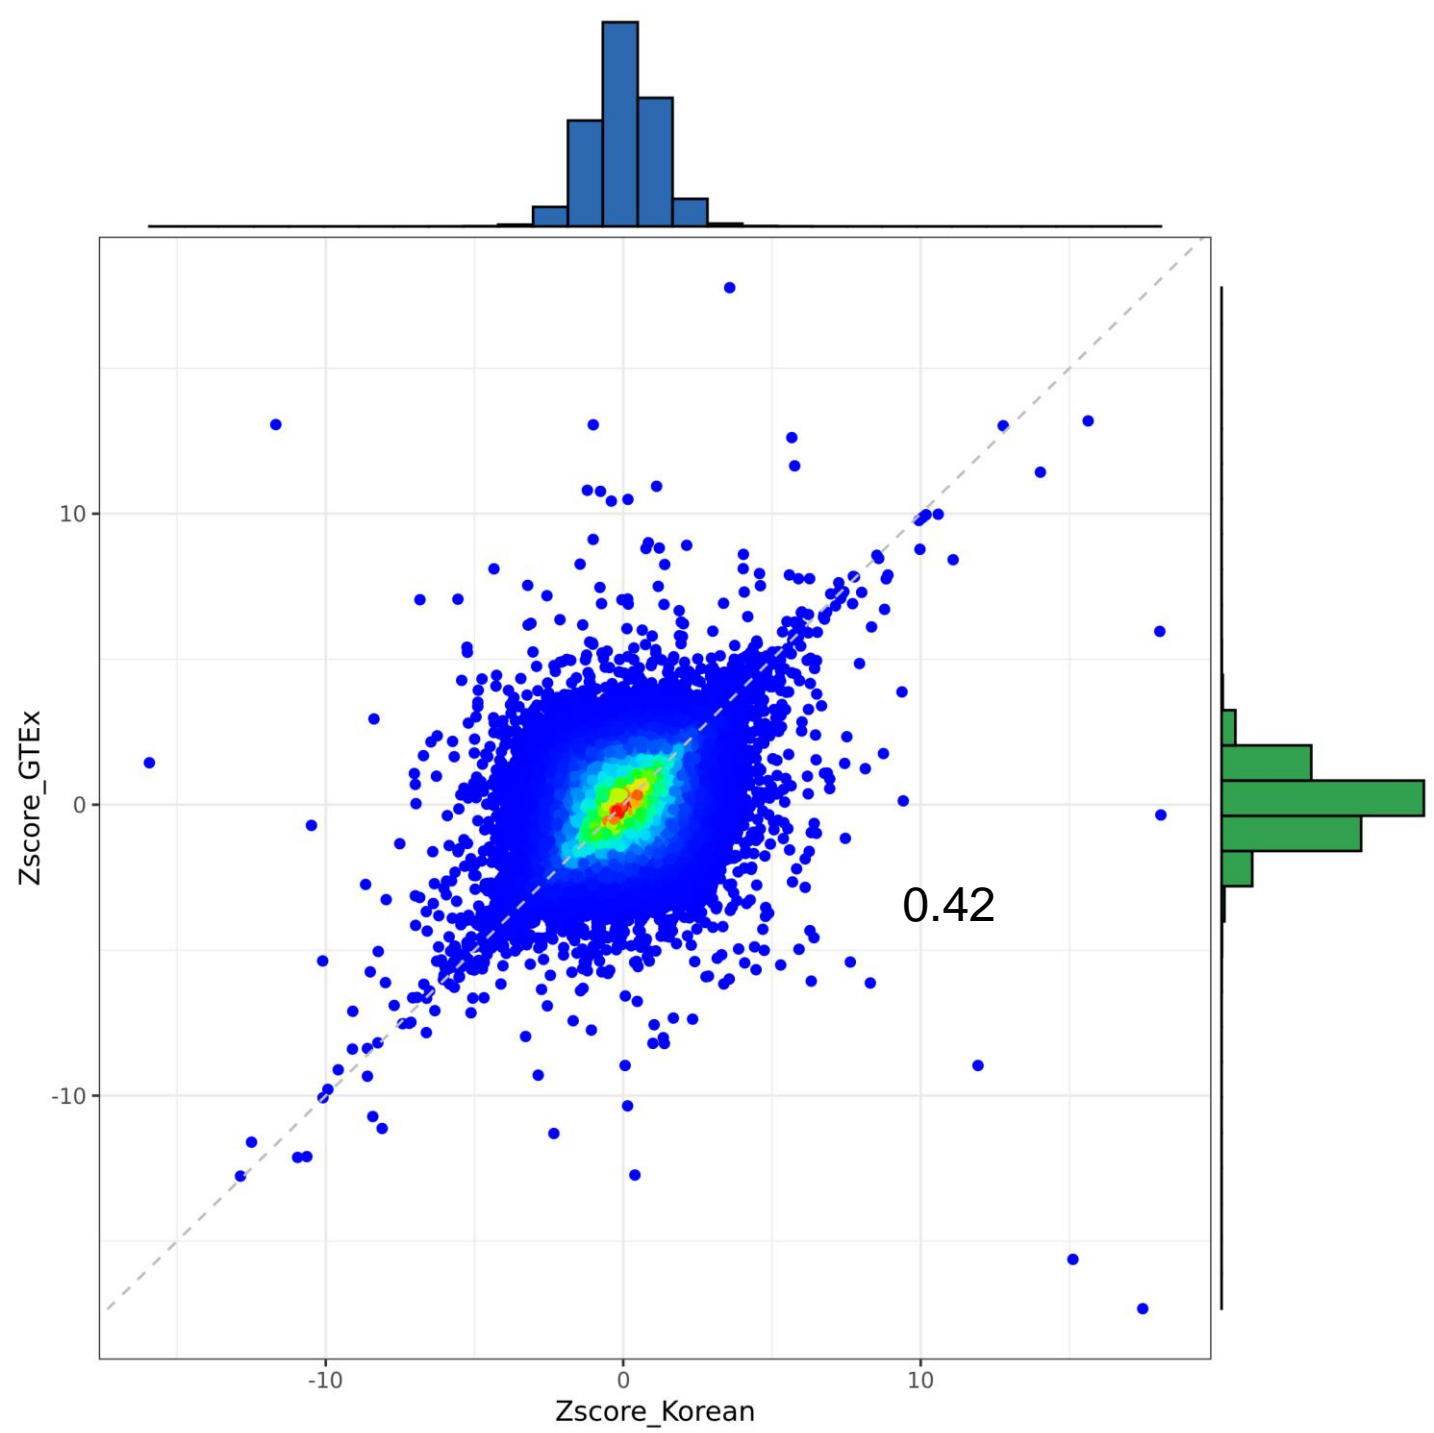

Supplement: Supplementary file 1 [file 378624fdb89fff45c3eb6973.pdf]
