# Supplementary material for: Transcriptome-Wide Association Studies of 81 traits in 79,294 Korean individuals
Source: Research Square preprint supplement (doi:10.21203/rs.3.rs-6417034/v1), 2025-04-17
Supplement: Supplementary file 1 [file b00d093c5daf03cbe0b8a2e2.xlsx]

## Sheet: Supply Tables
Description
Supplementary Table 1. Comparing Model (R2 & heritability) This table shows the overall performance of each GReX model. It includes the data used for GReX modeling, the number of genes in the model, and performance metrics (mean of R2, heritability). If the train and target data were the same, the R2 was calculated based on on cross-validation.
Supplementary Table 2. Comparing cis-eQTL results and components of GReX model. This table compares the components of the GReX model and the results of the cis-eQTL analysis. It shows the genes and eQTLs (SNPs) that are components of each model compared to the eQTL results, categorised according to different P cutoffs.
Supplementary Table 3. Summary of continuous phenotype. This table summarizes information on continuous phenotypes (traits). It includes the number of samples for each phenotype, overall statistics for covariates (age, BMI, smoke), and median, maximum, and minimum values for each phenotype. Additionally, it lists the queries used from the Harmonizome database for phenotype replication (Harmonizom…
Supplementary Table 4. Summary of binary phenotype. This table summarizes information on binary phenotypes (traits). It includes the ICD-10 code for each phenotype, the number of sample, and overall statistics for covariates (age, BMI, smoke). It also lists the Harmonizome database queries used for phenotype replication (Harmonizome Searching Keyword). Note that phenotypes without significant TWA…
Supplementary Table 5. Harmonizome replication results. This table presents the results of Harmonizome replication. The 'Condition' column describes the model and directionality for TWAS results, and the 'Replication' column shows the degree of replication for each association (refer to Table S6). The 'Evidence' column details the evidences for replication.
Supplementary Table 6. Summary of Harmonizome replication. This table summarizes the results of replication using the Harmonizome database for gene-trait TWAS results, specifically those based solely on the Korean-based model (Only_Korean), both models (Korean_GTEx), and only the GTEx-based model (Only_GTEx). Results that labeled like 'Strong', 'Weak', 'No' were considered as novel gene-phenotype…
Supplementary Table 7. Summary of overall TWAS results (Only significant association). This table presents comprehensive information on significant TWAS results (Bonferroni adjusted P < 0.05). It includes details on phenotype (Phenotype_Class) and gene (chromosome, start, end, gene_type), as well as TWAS results for each model (TWAS_Z_Korean, TWAS_p_Korean, TWAS_bonf_p_Korean, TWAS_Z_GTEx, TWAS_p…
Supplementary Table 8. Pathway enrichment analysis results (Only significant) This table shows the results of pathway enrichment analysis based on GO, KEGG, Reactome, and WikiPathways using significant gene-trait associations (FDR P <0.1) in TWAS results. Only pathways that are significant based on FDR P <0.1 are shown. p.adjust: Benjamini-Hochberg adjust p value
Supplementary Table 9. Drug repurposing analysis results (Only significant) This table shows the results of drug repurposing based on CLUE using gene features that were significant (FDR P <0.1) in the TWAS results. Only results that met the criterion of connectivity score ≤ -90 at least once in each model are shown. pert_id: perturbation id in CLUE Korean_Tau: Connectivity score of durg repurposi…

## Sheet: Table S1
Supplementary Table 1. Comparing Model (R2 & heritability)
Data for GReX Modeling	# of genes in Model	Target Data	mean of R2	mean(sd(fold_R2))	# of genes (R-squared)	mean of Heritability (GCTA)	# of genes (Heritability)
Korean (Asan + Chosun)	4699	Korean (Asan + Chosun)	0.06601	0.02782	4699	0.09364	4699
GTEx	7252	GTEx	0.1056	0.03587	7252	X	X
GTEx	7252	Korean (Asan + Chosun)	0.03034	X	7052	0.05485	7050

## Sheet: Table S2
Supplementary Table 2. Comparing cis-eQTL results and components of GReX model
# of Tests	89171674
P-value cut off	raw p-value					local significance level (multiple testing)		Global significance level (multiple testing)
	X	< 1e-2	< 1e-3	< 1e-6	< 1e-7	FDR < 0.05	FDR < 0.01	FDR < 0.05	FDR < 0.01
# of unique Genes	28017	26010	14538	3981	3309	6789	5200	11872	6811
# of Gene-eQTLs	89171674	2570515	1144646	445138	364367	1446959	969182	1004381	721419
# of Intersected Genes in GTEx model	7050	6834	5141	2499	2158	3553	3017	4657	3523
# of Intersected Genes in Korean model	4699	4699	4692	3381	2835	4434	4071	4680	4475
# of Intersected Gene-eQTLs in GTEx model	83362	19474	15213	9542	8405	16072	13637	14470	12530
# of Intersected Gene-eQTLs in Korean model	143534	100964	73265	45843	39923	78637	63908	69277	59981

## Sheet: Table S3
Supplementary Table 3. Summary of continuous phenotype
Class	Full name	Coding	Abbrev	N	% female	Mean age (SD)	Mean bmi (SD)	% smoker	Mean (SD)	median	max	min	Harmonizome Searching Keyword
anthropometric & lifestyle	body mass index	B_BMI	BMI	79294	0.614208	53.6668 (8.6217)	23.9394 (2.9431)	0.299607	23.9394 (2.9431)	23.7612	44.765	14.0273	body mass index, bmi, lipid
	height	B_HEIGHT	HEIGHT	79294	0.614208	53.6668 (8.6217)	23.9394 (2.9431)	0.299607	161.0877 (8.3042)	160.1	194	121	height
	hip circumference	B_HIP	HIP	71290	0.6403	54.1409 (8.3092)	24.0155 (2.9201)	0.279815	94.0614 (5.8466)	94	146	34	hip, hip circumference
	waist circumference	B_WAIST	WAIST	79197	0.614341	53.665 (8.6211)	23.9391 (2.9422)	0.299506	81.4725 (8.7419)	81.3	145	32	waist, waist circumference
blood pressure	average diastolic blood pressure	B_DBP	DBP	79254	0.614215	53.6664 (8.6219)	23.9395 (2.943)	0.299568	76.3585 (10.094)	76	155	40	blood pressure, diastolioc, pressure
	average systolic blood pressure	B_SBP	SBP	79254	0.614215	53.6664 (8.6219)	23.9395 (2.943)	0.299568	121.8455 (15.3212)	120	215	68	blood pressure, systolic, pressure
	mean arterial pressure	B_MAP	MAP	79254	0.614215	53.6664 (8.6219)	23.9395 (2.943)	0.299568	91.5208 (11.1156)	91.3333	170	51.3333	blood pressure, pressure, arterial
hematological	blood hematocrit	B_HCT	HCT	61589	0.606764	53.5968 (8.7984)	23.9515 (2.9856)	0.311387	41.8157 (3.9661)	41.6	67.4	14	hematocrit, blood hematocrit, hematolo, blood
	blood hemoglobin	B_HB	HB	77652	0.614137	53.6537 (8.6289)	23.9447 (2.9471)	0.300211	13.9165 (1.4777)	13.8	20.5	1.5	hemoglobin, blood hemoglobin, hematolo, blood
	blood mean corpuscular hemoglobin (MCH)	B_MCH	MCH	61588	0.606774	53.5967 (8.7984)	23.9515 (2.9856)	0.311376	30.5615 (1.9535)	30.7002	47.5676	11.5869	hemoglobin, red blood cell, hematolo, blood
	blood mean corpuscular hemoglobin concentration (MCHC)	B_MCHC	MCHC	61589	0.606764	53.5968 (8.7984)	23.9515 (2.9856)	0.311387	33.3119 (1.1597)	33.3333	100	20.6231	hematocrit, hemoglobin, hematolo, blood
	blood mean corpuscular volume (MCV)	B_MCV	MCV	61588	0.606774	53.5967 (8.7984)	23.9515 (2.9856)	0.311376	91.722 (4.7702)	91.8803	138.919	31.8907	hematocrit, red blood cell, hematolo, blood
	blood platelet	B_PLAT	PLAT	61155	0.606508	53.5529 (8.7868)	23.9449 (2.984)	0.31152	252.9377 (59.0459)	248	1101	7	platelet, blood, hematolo, platelets
	Blood red blood cells (RBC)	B_RBC_B	RBC	61588	0.606774	53.5967 (8.7984)	23.9515 (2.9856)	0.311376	4.5649 (0.4314)	4.54	7.4	1.53	red blood, red blood cell, hematolo, blood, RBC
	blood white blood cells (WBC)	B_WBC_B	WBC	61589	0.606764	53.5968 (8.7984)	23.9515 (2.9856)	0.311387	5.8099 (1.6363)	5.58	23.5	1.45	white blood, white blood cell, hematolo, blood, WBC
kidney related	blood creatinine	B_CREATINE	CREATININE	79289	0.614209	53.667 (8.6216)	23.9394 (2.9431)	0.2996	0.8277 (0.2084)	0.8	14.52	0.29	creatinine, renal, kidney
	blood eGFR	B_EGFR	eGFR	79289	0.614209	53.667 (8.6216)	23.9394 (2.9431)	0.2996	90.5676 (14.3375)	92.4202	145.492	3.2519	glomerular filtration, glomerular, estimated, creatinine, renal, kidney
	blood urea nitrogen (BUN)	B_BUN	BUN	79279	0.614173	53.668 (8.6215)	23.9395 (2.9432)	0.299613	14.5649 (4.0115)	14	174.1	5	blood urea nitrogen, urea, nitrogen, kidney, renal, bun
liver related	blood alanine aminotransferase (ALT)	B_ALT	ALT	77559	0.613597	53.6631 (8.6279)	23.9469 (2.9471)	0.300545	23.1861 (22.4296)	19	3217	1	alanine aminotransferase, alanine, liver, alt
	blood aspartate aminotransferase (AST)	B_AST	AST	77681	0.614101	53.6551 (8.6288)	23.9447 (2.9469)	0.300202	24.4104 (21.5344)	22	4438	5	aspartate aminotransferase, aspartate, liver, ast
	blood gamma-glutamyl transferase	B_R_GTP	R_GTP	66646	0.637653	54.1033 (8.3215)	24.0302 (2.9288)	0.283168	30.5262 (41.0599)	20	2837	4	glutamyltransferase, gamma, gamma glutamyltransferase, ggt, liver
	blood total bilirubin	B_T_BIL	T_BIL	57167	0.604842	53.0622 (8.5566)	23.9092 (2.977)	0.312733	0.7681 (0.3321)	0.7	5.3	0.1	total bilirubin, bilirubin, liver
liver & kidney related	blood albumin	B_ALBUMIN	ALBUMIN	79288	0.614217	53.667 (8.6216)	23.9395 (2.943)	0.299591	4.5698 (0.2739)	4.6	5.8	2.7	albumin, serum albumin, protein, kidney, renal, liver
metabolic	blood glucose	B_GLU0	GLU	77711	0.614083	53.6466 (8.633)	23.9425 (2.9472)	0.300151	95.192 (19.6628)	92	772	12	glucose, blood, blood glucose, metabolic
	blood HbA1C (hemoglobin a1c)	B_HBA1C	HbA1C	45829	0.597613	52.8783 (8.6532)	23.8712 (2.9921)	0.319732	5.7086 (0.7233)	5.6	16.9	1	hba1c, hemoglobin A1C, hemoglobin, metabolic, blood
	blood high density lipoprotein cholesterol	B_HDL	HDL	79288	0.614204	53.6669 (8.6211)	23.9393 (2.943)	0.299604	52.2456 (13.0445)	51	144	7	high density lipoprotein cholesterol, lipoprotein, cholesterol, lipid, metabolic, hdl
	blood low density lipoprotein cholesterol	B_LDL	LDL	79188	0.613919	53.6709 (8.621)	23.942 (2.9426)	0.299793	118.9098 (32.5603)	117.2	329.6	-129.8	low density lipoprotein cholesterol, lipoprotein, cholesterol, lipid, metabolic, ldl
	blood total cholesterol	B_TCHL	TCHL	79292	0.614211	53.667 (8.6217)	23.9393 (2.9431)	0.299601	196.4783 (35.4098)	194	555	44	total cholesterol, lipid, metabolic, cholesterol
	blood triglyceride	B_TG	TG	79190	0.613941	53.6701 (8.6219)	23.9418 (2.9426)	0.299773	128.1312 (87.8287)	106	1919	16	triglyceride, lipid, metabolic, triglycerides

## Sheet: Table S4
Supplementary Table 4. Summary of binary phenotype
Class	Full name	Coding	Abbrev	ICD10	N	N_case	N_control	N_case/N_control	% female	Mean age (SD)	Mean bmi (SD)	% smoker	Harmonizome Searching Keyword
anthropometric & lifestyle	smoking status	B_SMOKE	SMOKE		79294	23757	55537	2.3377	0.614208	53.6668 (8.6217)	23.9394 (2.9431)	0.299607	smoke, smoking
cancer	breast cancer	B_BRCA	BRCA	C50 (Malignant neoplasm of breast)	48687	473	78777	166.548	1	53.1249 (8.2743)	23.6551 (3.0431)	0.0342802
	cervical cancer	B_UTCA	UTCA	C53 (Malignant neoplasm of cervix uteri)	48687	302	78948	261.417	1	53.1249 (8.2743)	23.6551 (3.0431)	0.0342802
	colorectal cancer	B_COLCA	COLCA	C18-C20 (Malignant neoplasms of colon, rectosigmoid junction, rectum, anus and anal canal)	79177	229	78948	344.751	0.614067	53.6689 (8.6217)	23.9385 (2.9435)	0.299708
	gastric cancer	B_GCA	GCA	C16 (Malignant neoplasm of stomach)	79250	407	78843	193.717	0.614347	53.6658 (8.6209)	23.9393 (2.9431)	0.299495
	liver cancer	B_HCCCA	HCCCA	C22 (Malignant neoplasm of liver and intrahepatic bile ducts)	79177	53	79124	1492.91	0.614067	53.6689 (8.6217)	23.9385 (2.9435)	0.299708
	lung cancer	B_LCA	LCA	C34 (Malignant neoplasm of bronchus and lung)	79177	65	79112	1217.11	0.614067	53.6689 (8.6217)	23.9385 (2.9435)	0.299708
	prostate cancer	B_PROCA	PROCA	C61 (Malignant neoplasm of prostate)	30557	67	79110	1180.75	0	54.5277 (9.0801)	24.3921 (2.7157)	0.721995
	thyroid cancer	B_THYCA	THYCA	C73 (Malignant neoplasm of thyroid gland)	79177	627	78550	125.279	0.614067	53.6689 (8.6217)	23.9385 (2.9435)	0.299708	thyroid cancer, cancer, carcinoma
cardiovascular diseases	angina	B_ANG	ANG	I20 (Angina pectoris)	2915	66	2849	43.1667	0.598285	55.4909 (7.7612)	24.5585 (3.0225)	0.271355
	arrhythmia	B_ARRHY	ARRHY	I49 (Other cardiac arrhythmias)	5024	48	4976	103.667	0.636146	60.1608 (8.9641)	24.521 (3.0621)	0.291202
	cerebrovascular disease	B_CVA	CVA	I60-I69 (Cerebrovascular diseases)	71369	930	70439	75.7409	0.640208	54.1421 (8.3088)	24.0156 (2.9206)	0.279897
	coronary artery disease	B_CAD	CAD	I25 (Chronic ischemic heart disease)	79246	2054	77192	37.5813	0.614302	53.665 (8.6208)	23.9392 (2.9429)	0.299536
	heart failure	B_CHF	CHF	I50 (Heart failure)	8301	27	8274	306.444	0.547283	52.9258 (8.4552)	24.6052 (3.0324)	0.35574
	hypertension	B_HTN	HTN	I10 (Essential (primary) hypertension)	79262	15837	63425	4.0049	0.614254	53.6671 (8.6216)	23.9395 (2.9431)	0.299589	hypertension, pressure, blood pressure, heart
	myocardial infarction	B_MI	MI	I21 (Acute myocardial infarction)	8299	62	8237	132.855	0.547295	52.9242 (8.455)	24.6055 (3.0327)	0.355826
	peripheral vascular disease	B_PV	PV	I73 (Other peripheral vascular diseases)	5386	16	5370	335.625	0.519681	51.5375 (8.4915)	24.6305 (3.0377)	0.401411
	stroke	B_STR	STR	I61-I64 (Cerebral infarctions and strokes not specified as haemorrhage or infarction)	58044	687	57357	83.4891	0.653849	53.7951 (8.015)	23.8875 (2.8763)	0.268072
	transient ischemic attack (TIA)	B_TIA	TIA	G45 (Transient cerebral ischemic attacks and related syndromes)	10244	23	10221	444.391	0.643791	54.522 (7.9777)	24.0718 (2.8428)	0.251074
	valvular disease	B_VD	VD	I34-I38 (Nonrheumatic valve disorders)	5024	18	5006	278.111	0.636146	60.1608 (8.9641)	24.521 (3.0621)	0.291202
digestive diseases	acute liver disease	B_LIV	LIV	K70-K77 (Diseases of liver (specific type depends on the condition))	60961	369	60592	164.206	0.651203	53.8769 (8.0115)	23.9194 (2.8868)	0.268221
	chronic gastritis	B_GASTRO	GASTRO	K29.5 (Chronic gastritis)	60955	6136	54819	8.934	0.651235	53.8761 (8.0117)	23.9195 (2.8872)	0.268214	chronic gastritis, gastritis, stomach
	chronic hepatitis B	B_HEPATITISB	HEPATITISB	B18.1 (Chronic viral hepatitis B without delta-agent)	7885	190	7695	40.5	0.379581	49.3533 (10.076)	23.249 (3.0536)	0.477489	Hepatitis B, Hepatitis, Liver
	chronic hepatitis C	B_HEPATITISC	HEPATITISC	B18.2 (Chronic viral hepatitis C)	7885	19	7866	414	0.379581	49.3533 (10.076)	23.249 (3.0536)	0.477489	Hepatitis C, Hepatitis, Liver
	fatty liver	B_FLIV	FLIV	K76.0 (Fatty (change of) liver, not elsewhere classified)	60949	3524	57425	16.2954	0.6512	53.8759 (8.0114)	23.9198 (2.8871)	0.268191
	gallstones	B_GB	GB	K80 (Cholelithiasis)	60960	1871	59089	31.5815	0.651214	53.8772 (8.0114)	23.9194 (2.8867)	0.268209
	gastritis, gastric/duodenal ulcer	B_STOMUL	STOMUL	K29 (Gastritis and duodenitis)	66344	10511	55833	5.3119	0.64054	53.686 (8.0765)	23.9772 (2.906)	0.279031
	liver cirrhosis	B_CIRRHOSIS	CIRRHOSIS	K74 (Fibrosis and cirrhosis of liver)	7885	15	7870	524.667	0.379581	49.3533 (10.076)	23.249 (3.0536)	0.477489
	ulcer (gastric/duodenal)	B_ULCER	ULCER	K25-K28 (Gastric and duodenal ulcers)	60951	4029	56922	14.1281	0.651195	53.8759 (8.011)	23.9196 (2.887)	0.268248
endocrine diseases	thyroid disease	B_THY	THY	E00-E07 (Disorders of thyroid gland)	74225	3075	71150	23.1382	0.612799	53.2257 (8.4186)	23.9001 (2.9307)	0.300128	thyroid disease, thyroid, grave
eye diseases	cataract	B_CATA	CATA	H25-H28 (Cataract)	60961	2170	58791	27.0926	0.65122	53.8773 (8.0118)	23.9193 (2.8863)	0.268221
	glaucoma	B_GLAU	GLAU	H40-H42 (Glaucoma)	50621	385	50236	130.483	0.656546	53.9037 (8.0298)	23.9212 (2.8996)	0.267992
kidney diseases	kidney disease	B_KD	KD	N00-N29 (Diseases of the kidney and ureter)	19769	209	19560	93.5885	0.509535	51.5488 (9.2475)	23.8375 (3.004)	0.380697
metabolic diseases	hyperlipidemia	B_LIP	LIP	E78 (Disorders of lipoprotein metabolism and other lipidemias)	79243	8186	71057	8.6803	0.614288	53.6649 (8.6209)	23.9393 (2.9429)	0.299534	hyperlipidemia, hyperlipoproteinemia, hyperlipidaemia, lipid
	type 2 diabetes	B_DM	DM	E11 (Type 2 diabetes mellitus)	79243	5364	73879	13.7731	0.614237	53.666 (8.6216)	23.9394 (2.9433)	0.299597	type 2 diabetes, diabetes, Diabetes Mellitus, T2D
musculoskeletal diseases	arthritis	B_ARTH	ARTH	M00-M19 (Arthropathies)	60951	5549	55402	9.9841	0.651179	53.8772 (8.0122)	23.9196 (2.8872)	0.268215
	fracture	B_FRAC	FRAC	S02-S92 (Fractures)	65052	7511	57541	7.6609	0.619305	53.3537 (8.5172)	23.8255 (2.9152)	0.294918	fracture, bone, osteo
	osteoporosis	B_OSTE	OSTE	M80-M82 (Osteoporosis)	60944	3294	57650	17.5015	0.651254	53.8761 (8.0114)	23.9188 (2.886)	0.268181
neurological diseases	neurosis	B_NOI	NOI	F40-F48 (Neurotic, stress-related and somatoform disorders)	2915	30	2885	96.1667	0.598285	55.4909 (7.7612)	24.5585 (3.0225)	0.271355
	parkinson's disease	B_PARK	PARK	G20 (Parkinson's disease)	10246	10	10236	1023.6	0.643861	54.5219 (7.9787)	24.0718 (2.8426)	0.251025
other diseases	allergic disease	B_ALLER	ALLER	L50-L54 (Urticaria and erythema)	74219	5889	68330	11.603	0.612835	53.2261 (8.4186)	23.8998 (2.9308)	0.300085
	gout	B_GT	GT	M10 (Gout)	55991	758	55233	72.8668	0.640067	53.4858 (8.0914)	23.9613 (2.9102)	0.284242
	intestinal polyp	B_POL	POL	K63.5 (Polyp of colon)	60944	3331	57613	17.296	0.651303	53.8759 (8.011)	23.9197 (2.8867)	0.268148
	periodontal disease	B_PER	PER	K05 (Gingivitis and periodontal diseases)	57203	3669	53534	14.5909	0.65341	53.8002 (8.0126)	23.8897 (2.8786)	0.268762
respiratory diseases	asthma	B_ASTH	ASTH	J45 (Asthma)	74224	1317	72907	55.3584	0.612834	53.2263 (8.4182)	23.8996 (2.9304)	0.300132
	chronic bronchitis	B_BRON	BRON	J42 (Unspecified chronic bronchitis)	54559	433	54126	125.002	0.655584	53.9274 (8.0203)	23.9184 (2.8959)	0.267032
	chronic obstructive pulmonary disease (COPD)	B_COPD	COPD	J44 (Other chronic obstructive pulmonary disease)	46874	85	46789	550.459	0.659598	53.8121 (8.034)	23.8846 (2.8907)	0.268699
	chronic pulmonary disease	B_CLD	CLD	J40-J47 (Chronic lower respiratory diseases)	52260	120	52140	434.5	0.645178	53.5777 (8.1118)	23.9615 (2.915)	0.282377	lung, respiratory, pneumoconiosis, silicosis, pneumonia, pulmonary, COPD
	tuberculosis	B_TB	TB	A15-A19 (Tuberculosis)	10806	378	10428	27.5873	0.438738	51.0157 (9.8917)	23.6036 (3.1006)	0.421803
urogenital diseases	cystitis (urinary tract infection)	B_UB	UB	N30 (Cystitis)	20580	980	19600	20	0.634402	54.13 (7.9573)	23.9911 (2.8336)	0.260253
	prostate hyperplasia	B_BPH	BPH	N40 (Benign prostatic hyperplasia)	15164	1144	15764	13.7797	0	55.2362 (8.3826)	24.436 (2.7174)	0.726391
	urinary tract infection	B_UT	UT	N39.0 (Urinary tract infection, site not specified)	25966	1022	24944	24.407	0.610606	53.5923 (8.139)	24.1237 (2.8887)	0.289532

## Sheet: Table S5
Supplementary Table 5. Harmonizome replication results
Genes	Phenotype	Condition	Replication	Evidence
ABCA1	B_HDL	Korean_Neg	Complete	hdl (GeneRIF) hdlcholesterol (GeneRIF) high density lipoprotein cholesterol level (GAD Gene-Disease)
ABCC4	B_PLAT	Korean_Neg	Complete	Platelet Count Measurement (DisGeNET Gene-Phenotype) platelet (GeneRIF) platelet count (GAD Gene-Disease)
ABHD3	B_TG	Korean_Neg	Weak	Phospholipids (dbGAP Gene-Trait) Phospholipid Measurement (DisGeNET Gene-Phenotype)
ABO	B_LIP	Korean_Neg	Complete	Hyperlipoproteinemia (DisGeNET Gene-Disease) Lipid traits (DisGeNET Gene-Phenotype)
ABO	B_ALBUMIN	Korean_Pos_GTEx_Pos	Complete	Serum Albumin Measurement (DisGeNET Gene-Phenotype)
ABO	B_HB	Korean_Pos_GTEx_Pos	Complete	Hemoglobin Measurement (DisGeNET Gene-Phenotype)
ABO	B_HCT	Korean_Pos_GTEx_Pos	Complete	Hematocrit Procedure (DisGeNET)
ABO	B_LDL	Korean_Neg_GTEx_Neg	Complete	Low Density Lipoprotein Cholesterol Measurement (DisGeNET) Serum Ldl Cholesterol Measurement (DisGeNET)
ABO	B_MCH	Korean_Neg_GTEx_Neg	Complete	Mean Corpuscular Volume (Result) (DisGeNET Gene-Phenotype) Mean corpuscular hemoglobin concentration (GWAS Catalog SNP-Phenotype) Finding Of Mean Corpuscular Hemoglobin (DisGeNET Gene-Phenotype)
ABO	B_MCHC	Korean_Pos_GTEx_Pos	Complete	Mean Corpuscular Volume (Result) (DisGeNET Gene-Phenotype) Mean corpuscular hemoglobin concentration (GWAS Catalog SNP-Phenotype) Finding Of Mean Corpuscular Hemoglobin (DisGeNET Gene-Phenotype)
ABO	B_MCV	Korean_Neg_GTEx_Neg	Complete	Mean Corpuscular Volume (Result) (DisGeNET Gene-Phenotype) Mean corpuscular hemoglobin concentration (GWAS Catalog SNP-Phenotype) Finding Of Mean Corpuscular Hemoglobin (DisGeNET Gene-Phenotype)
ABO	B_PLAT	Korean_Neg_GTEx_Neg	Complete	Platelet Count Measurement (DisGeNET Gene-Phenotype) Platelet Component Distribution Width Measurement (DisGeNET Gene-Phenotype)
ABO	B_RBC_B	Korean_Pos_GTEx_Pos	Complete	Red Blood Cell Count Measurement (DisGeNET Gene-Phenotype) Rdw - Red Blood Cell Distribution Width Result (DisGeNET Gene-Phenotype)
ABO	B_TCHL	Korean_Neg_GTEx_Neg	Complete	Serum Total Cholesterol Measurement (DisGeNET Gene-Phenotype) Hypercholesterolemia (DisGeNET Gene-Disease) Hypercholesterolemia, Familial (DisGeNET Gene-Disease)
ABO	B_ALT	GTEx_Pos	Strong	liver disease (GWASdb SNP-Disease) liver carcinoma (GWASdb SNP-Disease) Fatty Liver (CTD Gene-Disease)
ACP2	B_HDL	GTEx_Neg	Complete	High Density Lipoprotein Measurement (DisGeNET Gene-Phenotype) lipoproteins, hdl (GAD Gene-Disease) Lipoproteins, HDL (dbGAP Gene-Trait)
ACSL5	B_HDL	Korean_Neg_GTEx_Neg	Strong	Hyperlipidemias (CTD Gene-Disease) Hyperlipidemia (DisGeNET Gene-Disease) hyperlipidemia (GeneRIF)
ANKDD1A	B_PLAT	Korean_Neg	No	X
ANKRD18B	B_CREATINE	Korean_Pos	No	adrenal gland (HPA Tissue Protein Expression Profiles) adrenal gland (GTEx Tissue Gene Expression Profiles)
ANXA3	B_ALBUMIN	Korean_Neg	Strong	Albuminuria (CTD Gene-Disease) Liver Diseases (CTD Gene-Disease) Kidney Diseases (CTD Gene-Disease)
APOBEC3A	B_GASTRO	GTEx_Neg	Weak	Stomach Carcinoma (DisGeNET Gene-Disease, ICD: C16(Malignant neoplasm of stomach))
ARL17A	B_MCH	Korean_Neg	Strong	Rdw - Red Blood Cell Distribution Width Result (DisGeNET Gene-Phenotype)
ARL17B	B_MCH	Korean_Neg	Strong	Rdw - Red Blood Cell Distribution Width Result (DisGeNET Gene-Phenotype)
ARL17B	B_HEIGHT	GTEx_Pos	Complete	Body Height (DisGeNET Gene-Phenotype)
ARPC2	B_WBC_B	Korean_Pos	Complete	White Blood Cell Count Procedure (DisGeNET Gene-Phenotype)
ARPIN	B_HEIGHT	GTEx_Neg	No	X
ATP6V0E2	B_BUN	GTEx_Neg	Strong	Kidney Diseases (CTD Gene-Disease)
AZIN1	B_MCHC	Korean_Neg	Strong	Hematologic Diseases (CTD Gene-Disease) Red Blood Cell Count Measurement (DisGeNET Gene-Phenotype) Blood Basophil Count (Lab Test) (DisGeNET Gene-Phenotype)
B4GALT1	B_AST	Korean_Neg	Complete	Aspartate Aminotransferase Measurement (DisGeNET Gene-Phenotype) Liver Diseases (CTD Gene-Disease)
B4GALT1	B_HDL	Korean_Neg	Strong	cholesterol (GAD Gene-Disease) Cholesterol (dbGAP Gene-Trait)
BAK1	B_HDL	GTEx_Neg	Strong	lipoprotein (GeneRIF Biological Term Annotations) Hypercholesterolemia (CTD Gene-Disease) Hyperlipidemias (CTD Gene-Disease) Dyslipidemias (CTD Gene-Disease)
BAK1	B_PLAT	GTEx_Neg	Complete	platelet count (GAD Gene-Disease) Platelet Count Measurement (DisGeNET Gene-Phenotype) platelets (GeneRIF Biological Term Annotations) Platelet counts (GWAS Catalog SNP-Phenotype) Platelet Count (dbGAP Gene-Trait)
BTN2A1	B_HTN	Korean_Pos	Complete	Hypertension (HuGE Navigator Gene-Phenotype) hypertension (GeneRIF Biological Term Annotations) heart disease (DISEASES Text-mining Gene-Disease Assocation Evidence Scores)
BTN3A2	B_PLAT	GTEx_Pos	No	X
BTN3A3	B_HEIGHT	Korean_Neg	No	X
BTN3A3	B_PLAT	Korean_Neg	Weak	Anemia (CTD Gene-Disease)
C10orf11	B_GLU0	GTEx_Neg	Complete	abnormal glucose homeostasis (GWASdb SNP-Phenotype) glucose metabolism disease (GWASdb SNP-Disease)
C1QTNF4	B_ALBUMIN	Korean_Pos_GTEx_Pos	Strong	Proteinuria (CTD Gene-Disease) Kidney Diseases (CTD Gene-Disease)
C1QTNF7	B_MCH	Korean_Pos	No	X
C1QTNF7	B_MCV	Korean_Pos	No	X
C2orf74	B_HTN	Korean_Neg_GTEx_Neg	Weak	Congenital Heart Defects (DisGeNET Gene-Disease, ICD: Q24 (Other congenital malformations of heart))
C2orf74	B_MCH	Korean_Neg_GTEx_Neg	No	X
C6orf48	B_THY	Korean_Neg	Complete	Graves Disease (DisGeNET Gene-Disease)
C6orf48	B_HB	Korean_Pos	Weak	Anemia (CTD Gene-Disease)
C6orf48	B_HCT	Korean_Pos	Weak	Anemia (CTD Gene-Disease)
C6orf48	B_PLAT	Korean_Pos	Weak	Anemia (CTD Gene-Disease)
C6orf48	B_RBC_B	Korean_Pos	Weak	Anemia (CTD Gene-Disease)
CAMK1D	B_DM	Korean_Pos_GTEx_Pos	Complete	type 2 diabetes mellitus (GWASdb SNP-Disease) type 2 diabetes (GAD Gene-Disease) Diabetes (DisGeNET Gene-Disease)
CAMK1D	B_GLU0	Korean_Pos_GTEx_Pos	Complete	abnormal glucose homeostasis (GWASdb SNP-Phenotype) glucose metabolism disease (GWASdb SNP-Disease) glucose metabolism disease (DISEASES Text-mining Gene-Disease Assocation Evidence Scores)
CAMK1D	B_HBA1C	Korean_Pos_GTEx_Pos	Strong	diabetes, type 2 (GAD Gene-Disease) type 2 diabetes (GAD Gene-Disease) Diabetes Mellitus, Type 2 (HuGE Navigator Gene-Phenotype)
CCDC152	B_HEIGHT	GTEx_Pos	No	X
CCS	B_CREATINE	GTEx_Neg	Strong	Kidney Diseases (CTD Gene-Disease) Adenoma_Adrenal gland_GSE8514 (GEO Signatures of Differentially Expressed Genes for Diseases) Renal Insufficiency (CTD Gene-Disease)
CCS	B_EGFR	GTEx_Pos	Strong	Kidney Diseases (CTD Gene-Disease) Adenoma_Adrenal gland_GSE8514 (GEO Signatures of Differentially Expressed Genes for Diseases) Renal Insufficiency (CTD Gene-Disease)
CD101	B_MCH	Korean_Pos	Weak	hematologic cancer (DISEASES Text-mining Gene-Disease Assocation Evidence Scores)
CD109	B_FRAC	Korean_Pos	Weak	Osteopenia (DisGeNET Gene-Disease, ICD: M85 (Other disorders of bone density and structure)) musculoskeletal system disease (DISEASES Text-mining Gene-Disease Assocation Evidence Scores, ICD: XIII(Diseases of the musculoskeletal system and connective tissue)) bone (TISSUES Text-mining Tissue Protein Expression Evidence Scores)
CD36	B_HDL	Korean_Pos	Complete	High Density Lipoprotein Measurement (DisGeNET Gene-Phenotype) Serum Hdl Cholesterol Measurement (DisGeNET Gene-Phenotype) hdlcholesterol (GeneRIF Biological Term Annotations)
CDK10	B_HEIGHT	Korean_Pos_GTEx_Pos	Complete	Body Height (DisGeNET Gene-Phenotype)
CDK2AP1	B_ALT	Korean_Neg_GTEx_Neg	Strong	Drug-Induced Liver Injury (CTD Gene-Disease) Liver Neoplasm (CTD Gene-Disease) Fatty Liver (CTD Gene-Disease)
CDK2AP1	B_HDL	Korean_Pos_GTEx_Pos	No	X
CFAP44	B_HEIGHT	Korean_Pos	No	X
CHMP1A	B_HEIGHT	Korean_Pos	No	X
CLOCK	B_HEIGHT	GTEx_Pos	Complete	abnormality of body height (GWASdb SNP-Phenotype) Body Height (DisGeNET Gene-Phenotype) Height (DisGeNET Gene-Phenotype)
CNN2	B_WBC_B	Korean_Neg	Weak	blood platelet (TISSUES Curated Tissue Protein Expression Evidence Scores) Anemia (CTD Gene-Disease)
CNTROB	B_HCT	Korean_Pos	No	X
CPT1B	B_MCH	Korean_Pos	Weak	Anemia (CTD Gene-Disease) Blood Coagulation Disorders (CTD Gene-Disease) abnormality of blood and blood-forming tissues (GWASdb SNP-Phenotype)
CPT1B	B_MCV	Korean_Pos	Weak	Anemia (CTD Gene-Disease) Blood Coagulation Disorders (CTD Gene-Disease) abnormality of blood and blood-forming tissues (GWASdb SNP-Phenotype)
CRAT	B_MCHC	Korean_Pos_GTEx_Pos	Strong	Blood Coagulation Disorders (CTD Gene-Disease) Rdw - Red Blood Cell Distribution Width Result (DisGeNET Gene-Phenotype) Red Blood Cell Count Measurement (DisGeNET Gene-Phenotype)
CRIPAK	B_DM	GTEx_Neg	No	X
CRIPAK	B_GLU0	GTEx_Neg	No	X
CROCC	B_HEIGHT	Korean_Neg_GTEx_Neg	Complete	Body Height (DisGeNET Gene-Phenotype)
CTSH	B_AST	Korean_Neg_GTEx_Neg	Strong	Liver Diseases (CTD Gene-Disease) Liver Cirrhosis (CTD Gene-Disease) Liver Neoplasm (CTD Gene-Disease)
CTSW	B_CREATINE	Korean_Pos_GTEx_Pos	Strong	Kidney Diseases (CTD Gene-Disease)
CTSW	B_EGFR	Korean_Neg_GTEx_Neg	Strong	Kidney Diseases (CTD Gene-Disease)
CUL7	B_HEIGHT	Korean_Pos	Strong	increased vertebral height (HPO Gene-Disease) abnormality of body height (HPO Gene-Disease) Increased Vertebral Height (DisGeNET Gene-Phenotype)
CYP27A1	B_HEIGHT	GTEx_Neg	No	X
DDX39B	B_HB	Korean_Neg	Weak	abnormality of blood and blood-forming tissues (GWASdb SNP-Phenotype) blood cancer cell (TISSUES Text-mining Tissue Protein Expression Evidence Scores) Anemia, Hemolytic (CTD Gene-Disease)
DDX39B	B_HCT	Korean_Neg	Weak	abnormality of blood and blood-forming tissues (GWASdb SNP-Phenotype) blood cancer cell (TISSUES Text-mining Tissue Protein Expression Evidence Scores) Anemia, Hemolytic (CTD Gene-Disease)
DDX39B	B_RBC_B	Korean_Neg	Weak	abnormality of blood and blood-forming tissues (GWASdb SNP-Phenotype) blood cancer cell (TISSUES Text-mining Tissue Protein Expression Evidence Scores) Anemia, Hemolytic (CTD Gene-Disease)
DDX39B	B_WBC_B	Korean_Neg	Weak	abnormality of blood and blood-forming tissues (GWASdb SNP-Phenotype) blood cancer cell (TISSUES Text-mining Tissue Protein Expression Evidence Scores) Anemia, Hemolytic (CTD Gene-Disease)
DEF6	B_ALT	GTEx_Neg	Strong	Liver Diseases (CTD Gene-Disease) Liver Cirrhosis (CTD Gene-Disease) Liver Neoplasm (CTD Gene-Disease)
DEF6	B_AST	GTEx_Neg	Strong	Liver Diseases (CTD Gene-Disease) Liver Cirrhosis (CTD Gene-Disease) Liver Neoplasm (CTD Gene-Disease)
DEF6	B_HEIGHT	GTEx_Pos	Complete	Height (DisGeNET Gene-Phenotype) height (GAD Gene-Disease) abnormality of body height (GWASdb SNP-Phenotype)
DEF6	B_WBC_B	GTEx_Pos	Complete	White Blood Cell Count Procedure (DisGeNET Gene-Phenotype)
DENND4A	B_RBC_B	Korean_Neg	Complete	Red Blood Cell Count Measurement (DisGeNET Gene-Phenotype) Red blood cell traits (GWAS Catalog SNP-Phenotype)
DENND4A	B_MCH	Korean_Pos_GTEx_Neg	Complete	Mean corpuscular hemoglobin (GWAS Catalog SNP-Phenotype) Finding Of Mean Corpuscular Hemoglobin (DisGeNET Gene-Phenotype) Corpuscular Hemoglobin Concentration Mean (DisGeNET Gene-Phenotype)
DENND4A	B_MCHC	Korean_Pos_GTEx_Neg	Complete	Corpuscular Hemoglobin Concentration Mean (DisGeNET Gene-Phenotype) Mean Corpuscular Volume (Result) (DisGeNET Gene-Phenotype) Mean corpuscular hemoglobin (GWAS Catalog SNP-Phenotype)
DENND4A	B_MCV	Korean_Pos_GTEx_Neg	Complete	Mean Corpuscular Volume (Result) (DisGeNET Gene-Phenotype) Corpuscular Hemoglobin Concentration Mean (DisGeNET Gene-Phenotype) Mean corpuscular hemoglobin (GWAS Catalog SNP-Phenotype)
DLG5	B_R_GTP	GTEx_Pos	Complete	gamma-glutamyltransferase (GAD Gene-Disease) gamma-Glutamyltransferase (dbGAP Gene-Trait) liver disease (GWASdb SNP-Disease)
DMPK	B_BMI	Korean_Pos	Weak	Hyperlipidemias (HuGE Navigator Gene-Phenotype) Hyperlipidemias (CTD Gene-Disease) lipid metabolism disorder (DISEASES Text-mining Gene-Disease Assocation Evidence Scores)
DMPK	B_WAIST	Korean_Pos	Weak	Hyperlipidemias (HuGE Navigator Gene-Phenotype) Hyperlipidemias (CTD Gene-Disease) lipid metabolism disorder (DISEASES Text-mining Gene-Disease Assocation Evidence Scores)
DOCK7	B_TG	Korean_Pos_GTEx_Pos	Complete	Triglycerides Measurement (DisGeNET Gene-Phenotype) Triglycerides (GWAS Catalog SNP-Phenotype) triglycerides (GAD Gene-Disease)
DOCK7	B_PLAT	GTEx_Neg	Complete	abnormal platelet count (GWASdb SNP-Phenotype) Platelet Component Distribution Width Measurement (DisGeNET Gene-Phenotype)
DUS2	B_HDL	GTEx_Pos	Complete	High Density Lipoprotein Measurement (DisGeNET Gene-Phenotype) Serum Hdl Cholesterol Measurement (DisGeNET Gene-Phenotype)
DYSF	B_HEIGHT	Korean_Pos	Complete	Body Height (DisGeNET Gene-Phenotype)
EFCAB13	B_LDL	Korean_Neg	Complete	Low Density Lipoprotein Cholesterol Measurement (DisGeNET Gene-Phenotype) Cholesterol, LDL (dbGAP Gene-Trait) cholesterol, ldl (GAD Gene-Disease)
EFCAB13	B_TCHL	Korean_Neg	Complete	Serum Total Cholesterol Measurement (DisGeNET Gene-Phenotype) Cholesterol, total (GWAS Catalog SNP-Phenotype) cholesterol (GAD Gene-Disease)
EML6	B_HTN	Korean_Pos_GTEx_Pos	Complete	hypertension (GWASdb SNP-Disease) Mean Blood Pressure (DisGeNET Gene-Phenotype) Diastolic Blood Pressure (DisGeNET Gene-Phenotype) Systolic Pressure (DisGeNET Gene-Phenotype)
ETV7	B_PLAT	GTEx_Neg	Complete	Platelet Count Measurement (DisGeNET Gene-Phenotype) Platelet Mean Volume Determination (Procedure) (DisGeNET Gene-Phenotype)
FADS2	B_ALT	Korean_Neg	Complete	Alanine Aminotransferase Measurement (DisGeNET Gene-Phenotype) Serum Alanine Aminotransferase Measurement (DisGeNET Gene-Phenotype)
FADS2	B_GLU0	Korean_Neg	Complete	Glucose Measurement (DisGeNET Gene-Phenotype) glucose (GeneRIF Biological Term Annotations) Elevated Blood Glucose Level (DisGeNET Gene-Phenotype Associations)
FADS2	B_HB	Korean_Pos	Weak	Glycated hemoglobin levels (GWAS Catalog SNP-Phenotype) Hematologic Diseases (CTD Gene-Disease) hematologic cancer (DISEASES Text-mining Gene-Disease Assocation Evidence Scores)
FADS2	B_HCT	Korean_Pos	Complete	Hematocrit Procedure (DisGeNET Gene-Phenotype) Mean Corpuscular Volume (Result) (DisGeNET Gene-Phenotype) Hematologic Diseases (CTD Gene-Disease)
FADS2	B_HEIGHT	Korean_Neg	Complete	Body Height (DisGeNET Gene-Phenotype)
FADS2	B_LDL	Korean_Neg	Complete	Low Density Lipoprotein Cholesterol Measurement (DisGeNET Gene-Phenotype) lipoproteins, ldl (GAD Gene-Disease) Lipoproteins, LDL (dbGAP Gene-Trait)
FADS2	B_PLAT	Korean_Pos	Complete	Platelet Count Measurement (DisGeNET Gene-Phenotype) Platelet Mean Volume Determination (Procedure) (DisGeNET Gene-Phenotype) decreased platelet aggregation (MPO Gene-Phenotype)
FADS2	B_RBC_B	Korean_Pos	Strong	Rdw - Red Blood Cell Distribution Width Result (DisGeNET Gene-Phenotype) Mean Corpuscular Volume (Result) (DisGeNET Gene-Phenotype)
FADS2	B_TCHL	Korean_Neg	Complete	Serum Total Cholesterol Measurement (DisGeNET Gene-Phenotype) cholesterol, total (GAD Gene-Disease) cholesterol (GeneRIF Biological Term Annotations)
FADS2	B_TG	Korean_Pos	Complete	Triglycerides Measurement (DisGeNET Gene-Phenotype) Triglycerides (dbGAP Gene-Trait) triglycerides (GAD Gene-Disease)
FADS2	B_HBA1C	Korean_Neg_GTEx_Neg	Strong	Glycated hemoglobin levels GWAS Catalog SNP-Phenotype) type 2 diabetes (GAD Gene-Disease) metabolic syndrome (GAD Gene-Disease)
FAM84B	B_BUN	Korean_Neg_GTEx_Neg	No	adrenal gland (HPA Tissue Protein Expression Profiles)
FBXL5	B_MCH	Korean_Pos	Strong	Red Blood Cell Count Measurement (DisGeNET Gene-Phenotype) hematologic cancer (DISEASES Text-mining Gene-Disease Assocation Evidence Scores)
FBXL5	B_MCV	Korean_Pos	Strong	Red Blood Cell Count Measurement (DisGeNET Gene-Phenotype) hematologic cancer (DISEASES Text-mining Gene-Disease Assocation Evidence Scores)
FIGNL1	B_MCV	Korean_Pos	Weak	Corpuscular Hemoglobin Concentration Mean (DisGeNET Gene-Phenotype)
FIGNL1	B_RBC_B	Korean_Neg_GTEx_Neg	Weak	Corpuscular Hemoglobin Concentration Mean (DisGeNET Gene-Phenotype)
FN3K	B_HBA1C	Korean_Neg_GTEx_Neg	Complete	hba1c GeneRIF Biological Term Annotations type 2 diabetes mellitus (GWASdb SNP-Disease) Diabetes Mellitus (DisGeNET Gene-Disease)
FTSJ3	B_HEIGHT	Korean_Neg_GTEx_Neg	Complete	Body Height (DisGeNET Gene-Phenotype)
GATAD2A	B_TG	Korean_Neg	Complete	Triglycerides Measurement (DisGeNET Gene-Phenotype)
GATM	B_CREATINE	Korean_Neg	Strong	Kidney Diseases (CTD Gene-Disease)
GATM	B_EGFR	Korean_Pos	Strong	Kidney Diseases (CTD Gene-Disease)
GDF7	B_LDL	Korean_Pos	No	X
GDF7	B_TCHL	Korean_Pos	No	X
GIT1	B_WBC_B	Korean_Neg_GTEx_Neg	No	X
GLMP	B_MCH	Korean_Neg	Weak	abnormal blood cell morphology/development (MPO Gene-Phenotype) abnormal blood vessel morphology (MPO Gene-Phenotype) abnormal blood homeostasis (MPO Gene-Phenotype)
GLMP	B_MCHC	Korean_Pos	Weak	abnormal blood cell morphology/development (MPO Gene-Phenotype) abnormal blood vessel morphology (MPO Gene-Phenotype) abnormal blood homeostasis (MPO Gene-Phenotype)
GLMP	B_HBA1C	Korean_Pos_GTEx_Pos	No	X
GLMP	B_MCV	Korean_Neg_GTEx_Neg	Weak	abnormal blood cell morphology/development (MPO Gene-Phenotype) abnormal blood vessel morphology (MPO Gene-Phenotype) abnormal blood homeostasis (MPO Gene-Phenotype)
GLMP	B_RBC_B	Korean_Pos_GTEx_Pos	Weak	abnormal blood cell morphology/development (MPO Gene-Phenotype) abnormal blood vessel morphology (MPO Gene-Phenotype) abnormal blood homeostasis (MPO Gene-Phenotype)
GLYCTK	B_ALBUMIN	GTEx_Neg	Strong	Proteinuria (CTD Gene-Disease) Fatty Liver CTD (Gene-Disease)
GNAS	B_BUN	Korean_Pos	Complete	Blood Urea Nitrogen Measurement (DisGeNET Gene-Phenotype) Kidney Diseases (CTD Gene-Disease) kidney disease (GWASdb SNP-Disease)
GNAS	B_EGFR	Korean_Neg	Complete	Glomerular Filtration Rate (DisGeNET Gene-Phenotype) Creatinine Measurement, Serum (Procedure) (DisGeNET Gene-Phenotype) Kidney Diseases (CTD Gene-Disease)
GNAS	B_HEIGHT	Korean_Neg	Complete	Body Height (DisGeNET Gene-Phenotype) abnormality of body height (HPO Gene-Disease)
GP6	B_LIP	Korean_Neg	Strong	lipidrich (GeneRIF Biological Term Annotations) abnormality of lipid metabolism (GWASdb SNP-Phenotype Associations) lipid metabolism disorder (GWASdb SNP-Disease Associations)
GPR180	B_TG	GTEx_Pos	Complete	Triglycerides Measurement (DisGeNET Gene-Phenotype)
GPSM3	B_THY	Korean_Neg	No	X
GPSM3	B_HBA1C	Korean_Pos	Strong	Diabetes Mellitus (DisGeNET Gene-Disease) type 1 diabetes mellitus (GWASdb SNP-Disease) type 2 diabetes mellitus (GWASdb SNP-Disease)
GPSM3	B_PLAT	Korean_Pos	Weak	abnormality of blood and blood-forming tissues (GWASdb SNP-Phenotype) abnormal blood cell morphology/development (MPO Gene-Phenotype) Anemia CTD (Gene-Disease)
GPSM3	B_RBC_B	Korean_Pos	Weak	abnormality of blood and blood-forming tissues (GWASdb SNP-Phenotype) abnormal blood cell morphology/development (MPO Gene-Phenotype) Anemia CTD (Gene-Disease)
GRHL1	B_BUN	Korean_Neg	Complete	Blood Urea Nitrogen Measurement (DisGeNET Gene-Phenotype) Kidney Diseases (CTD Gene-Disease) kidney disease (DISEASES Text-mining Gene-Disease Assocation Evidence Scores)
GSTA1	B_MCH	Korean_Neg	Weak	hemoglobinopathies (GeneRIF Biological Term Annotations) hemoglobinopathies (GAD Gene-Disease)
GSTM1	B_HDL	Korean_Neg	Complete	hdlcholesterol (GeneRIF Biological Term Annotations) cholesterol; cholesterol, hdl; triglycerides; diabetes, type 2; ulcerative colitis; cholesterol, ldl; liver disease; (GAD Gene-Disease)
GSTM2	B_HDL	Korean_Neg	Strong	Hypercholesterolemia (CTD Gene-Disease) Hyperlipidemias (CTD Gene-Disease) Dyslipidemias (CTD Gene-Disease)
GSTM5	B_HDL	Korean_Neg	Strong	Hypercholesterolemia (CTD Gene-Disease) Hyperlipidemias (CTD Gene-Disease)
HBZ	B_MCH	GTEx_Pos	Complete	Finding Of Mean Corpuscular Hemoglobin (DisGeNET Gene-Phenotype) Mean Corpuscular Volume (Result) (DisGeNET Gene-Phenotype) Corpuscular Hemoglobin Concentration Mean (DisGeNET Gene-Phenotype)
HBZ	B_MCHC	GTEx_Pos	Complete	Corpuscular Hemoglobin Concentration Mean (DisGeNET Gene-Phenotype) Finding Of Mean Corpuscular Hemoglobin (DisGeNET Gene-Phenotype) Mean Corpuscular Volume (Result) (DisGeNET Gene-Phenotype)
HBZ	B_MCV	GTEx_Pos	Complete	Mean Corpuscular Volume (Result) (DisGeNET Gene-Phenotype) Finding Of Mean Corpuscular Hemoglobin (DisGeNET Gene-Phenotype) Corpuscular Hemoglobin Concentration Mean (DisGeNET Gene-Phenotype)
HBZ	B_RBC_B	GTEx_Neg	Complete	Red Blood Cell Count Measurement DisGeNET Gene-Phenotype abnormal red blood cell distribution width (MPO Gene-Phenotype) increased red blood cell distribution width (MPO Gene-Phenotype)
HDLBP	B_HEIGHT	Korean_Neg	Complete	Body Height (DisGeNET Gene-Phenotype)
HEATR3	B_MCH	Korean_Neg_GTEx_Neg	Strong	Rdw - Red Blood Cell Distribution Width Result (DisGeNET Gene-Phenotype)
HEATR3	B_MCV	Korean_Neg_GTEx_Neg	Strong	Rdw - Red Blood Cell Distribution Width Result (DisGeNET Gene-Phenotype)
HEATR3	B_RBC_B	Korean_Pos_GTEx_Pos	Strong	Rdw - Red Blood Cell Distribution Width Result (DisGeNET Gene-Phenotype)
HECTD4	B_AST	Korean_Neg	Complete	Aspartate Aminotransferase Measurement (DisGeNET Gene-Phenotype) aspartate aminotransferases (GAD Gene-Disease) Aspartate Aminotransferases (dbGAP Gene-Trait)
HECTD4	B_BMI	Korean_Neg	Complete	Body Mass Index (DisGeNET Gene-Phenotype)
HECTD4	B_BUN	Korean_Pos	Complete	Blood Urea Nitrogen Measurement (DisGeNET Gene-Phenotype) kidney disease (GWASdb SNP-Disease) Renal function-related traits (BUN) (GWAS Catalog SNP-Phenotype)
HECTD4	B_CREATINE	Korean_Pos	Strong	kidney disease (GWASdb SNP-Disease) kidney disease (DISEASES Experimental Gene-Disease Assocation Evidence Scores)
HECTD4	B_DBP	Korean_Neg	Complete	Diastolic Blood Pressure Measurement (DisGeNET Gene-Phenotype) Diastolic Blood Pressure (DisGeNET Gene-Phenotype) Mean Blood Pressure (DisGeNET Gene-Phenotype)
HECTD4	B_EGFR	Korean_Neg	Strong	kidney disease (GWASdb SNP-Disease) kidney disease (DISEASES Experimental Gene-Disease Assocation Evidence Scores)
HECTD4	B_GLU0	Korean_Neg	Strong	abnormal glucose homeostasis (GWASdb SNP-Phenotype) glucose (GeneRIF Biological Term Annotations)
HECTD4	B_HCT	Korean_Pos	Strong	Mean Corpuscular Volume (Result) DisGeNET Gene-Phenotype Corpuscular Hemoglobin Concentration Mean DisGeNET Gene-Phenotype
HECTD4	B_HDL	Korean_Neg	Complete	High Density Lipoprotein Measurement (DisGeNET Gene-Phenotype) Cholesterol, HDL (dbGAP Gene-Trait) Serum Hdl Cholesterol Measurement (DisGeNET Gene-Phenotype)
HECTD4	B_MAP	Korean_Neg	Complete	Mean Blood Pressure (DisGeNET Gene-Phenotype) Blood Pressure (DisGeNET Gene-Phenotype) blood pressure (GAD Gene-Disease)
HECTD4	B_MCH	Korean_Neg	Strong	Mean Corpuscular Volume (Result) (DisGeNET Gene-Phenotype) Corpuscular Hemoglobin Concentration Mean (DisGeNET Gene-Phenotype) Red Blood Cell Count Measurement (DisGeNET Gene-Phenotype)
HECTD4	B_MCV	Korean_Neg	Complete	Mean Corpuscular Volume (Result) (DisGeNET Gene-Phenotype) Corpuscular Hemoglobin Concentration Mean (DisGeNET Gene-Phenotype) Red Blood Cell Count Measurement (DisGeNET Gene-Phenotype)
HECTD4	B_PLAT	Korean_Pos	Strong	Platelet Aggregation (dbGAP Gene-Trait) platelet aggregation (GAD Gene-Disease)
HECTD4	B_R_GTP	Korean_Neg	Complete	gamma-glutamyltransferase (GAD Gene-Disease) gamma-Glutamyltransferase (dbGAP Gene-Trait) Serum Gamma-Glutamyl Transferase Measurement (DisGeNET Gene-Phenotype)
HECTD4	B_RBC_B	Korean_Pos	Complete	Red Blood Cell Count Measurement (DisGeNET Gene-Phenotype) Mean Corpuscular Volume (Result) (DisGeNET Gene-Phenotype)
HECTD4	B_WAIST	Korean_Neg	Complete	Waist-Hip Ratio (DisGeNET Gene-Phenotype) waist-hip ratio (GAD Gene-Disease) Waist-Hip Ratio (dbGAP Gene-Trait)
HLA-A	B_HEIGHT	Korean_Neg	No	X
HLA-A	B_MCV	Korean_Pos	Strong	Corpuscular Hemoglobin Concentration Mean (DisGeNET Gene-Phenotype) Hematocrit Procedure (DisGeNET Gene-Phenotype) blood platelet (DisGeNET Gene-Phenotype)
HLA-A	B_CREATINE	GTEx_Pos	Strong	Kidney Diseases (CTD Gene-Disease) Acute Kidney Injury (GAD Gene-Disease) Kidney Failure, Chronic (DisGeNET Gene-Disease)
HLA-A	B_EGFR	GTEx_Neg	Strong	Kidney Diseases (CTD Gene-Disease) Acute Kidney Injury (GAD Gene-Disease) Kidney Failure, Chronic (DisGeNET Gene-Disease)
HLA-B	B_HB	Korean_Pos	Complete	Hemoglobin Measurement (DisGeNET Gene-Phenotype)
HLA-B	B_RBC_B	Korean_Pos	Complete	Red Blood Cell Count Measurement (DisGeNET Gene-Phenotype) Mean Corpuscular Volume (Result) (DisGeNET Gene-Phenotype)
HLA-B	B_WBC_B	Korean_Pos	Complete	White Blood Cell Count Procedure (DisGeNET Gene-Phenotype)
HLA-B	B_PLAT	GTEx_Neg	Complete	Platelet Count Measurement (DisGeNET Gene-Phenotype) abnormal platelet count (GWASdb SNP-Phenotype) Platelet counts (GWAS Catalog SNP-Phenotype)
HLA-DOB	B_TCHL	Korean_Pos_GTEx_Pos	No	X
HLA-DOB	B_TG	Korean_Pos_GTEx_Pos	No	X
HLA-DPA1	B_WBC_B	GTEx_Neg	Weak	hematologic neoplasms (GAD Gene-Disease) Hematologic Neoplasms (HuGE Navigator Gene-Phenotype) blood platelet (TISSUES Text-mining Tissue Protein Expression Evidence Scores)
HLA-DPB1	B_TG	Korean_Neg	Weak	Antiphospholipid Syndrome (DisGeNET Gene-Disease) acquired metabolic disease (GWASdb SNP-Disease) inherited metabolic disorder (DISEASES Text-mining Gene-Disease Assocation Evidence Scores)
HLA-DQA1	B_PLAT	Korean_Pos_GTEx_Pos	Weak	hematologic neoplasms (GAD Gene-Disease) Red Blood Cell Count Measurement (DisGeNET Gene-Phenotype) Blood Protein Measurement (DisGeNET Gene-Phenotype)
HLA-DQA1	B_HIP	GTEx_Pos	No	X
HLA-DQA2	B_RBC_B	Korean_Neg	Complete	Red Blood Cell Count Measurement (DisGeNET Gene-Phenotype)
HLA-DQB1	B_PLAT	GTEx_Pos	Weak	Blood Protein Measurement (DisGeNET Gene-Phenotype) Hematologic Diseases (HuGE Navigator Gene-Phenotype) hematological (GAD High Level Gene-Disease)
HLA-DQB1	B_TG	GTEx_Pos	Strong	Hypertriglyceridemia (CTD Gene-Disease) Dyslipidemias (CTD Gene-Disease) inherited metabolic disorder (GWASdb SNP-Disease)
HLA-DQB2	B_AST	Korean_Neg	Strong	Liver Cirrhosis (HuGE Navigator Gene-Phenotype) Liver Carcinoma (DisGeNET Gene-Disease) Liver Diseases (HuGE Navigator Gene-Phenotype)
HLA-DQB2	B_BMI	GTEx_Neg	No	X
HLA-DQB2	B_HIP	GTEx_Neg	No	X
HLA-DRA	B_PLAT	Korean_Pos	Weak	Hematologic Diseases (CTD Gene-Disease) hematological (GAD High Level Gene-Disease) abnormality of blood and blood-forming tissues (GWASdb SNP-Phenotype)
HLA-DRB1	B_HEIGHT	GTEx_Pos	No	X
HLA-DRB1	B_PLAT	GTEx_Pos	Complete	platelet (GeneRIF Biological Term Annotations) blood platelet (TISSUES Text-mining Tissue Protein Expression Evidence Scores) blood platelet disease (DISEASES Text-mining Gene-Disease Assocation Evidence Scores)
HLA-DRB1	B_WBC_B	GTEx_Neg	Weak	Hematologic Diseases (HuGE Navigator Gene-Phenotype) graft vs host disease; hematologic neoplasms (GAD Gene-Disease) hematologic neoplasms (GAD Gene-Disease)
HLA-DRB5	B_TG	Korean_Neg_GTEx_Neg	Weak	metabolic (GAD High Level Gene-Disease)
HLA-F	B_MCV	Korean_Pos	Weak	Anemia, Hemolytic (CTD Gene-Disease) Anemia (CTD Gene-Disease)
HLA-F	B_HEIGHT	Korean_Neg_GTEx_Pos	No	X
HSD17B11	B_AST	Korean_Neg	Strong	Liver Failure, Acute (CTD Gene-Disease) Liver Diseases (CTD Gene-Disease)
HSD17B11	B_HB	Korean_Neg	Weak	abnormal blood cell morphology/development (MPO Gene-Phenotype) Blood Protein Measurement (DisGeNET Gene-Phenotype) abnormal blood cell physiology (MPO Gene-Phenotype)
HSD17B11	B_HCT	Korean_Neg	Weak	abnormal blood cell morphology/development (MPO Gene-Phenotype) Blood Protein Measurement (DisGeNET Gene-Phenotype) abnormal blood cell physiology (MPO Gene-Phenotype)
HSD17B11	B_R_GTP	Korean_Neg	Strong	Liver Neoplasms (CTD Gene-Disease) Liver Diseases (CTD Gene-Disease)
HSD17B11	B_TG	Korean_Pos	Strong	Hypertriglyceridemia (CTD Gene-Disease) Hyperlipidemias (CTD Gene-Disease) Dyslipidemias (CTD Gene-Disease)
HSD17B11	B_ALT	Korean_Neg_GTEx_Neg	Strong	Liver Failure, Acute (CTD Gene-Disease) Liver Diseases (CTD Gene-Disease)
ICAM5	B_TG	Korean_Neg	Strong	lipid storage disease (GWASdb SNP-Disease) inherited metabolic disorder (GWASdb SNP-Disease)
ICAM5	B_WBC_B	Korean_Neg	Weak	Hematologic Diseases (HuGE Navigator Gene-Phenotype) Blood Protein Measurement (DisGeNET Gene-Phenotype)
INO80E	B_BMI	Korean_Neg_GTEx_Neg	Complete	Body Mass Index (DisGeNET Gene-Phenotype)
INO80E	B_HIP	Korean_Neg_GTEx_Neg	Strong	Body Mass Index (DisGeNET Gene-Phenotype)
INO80E	B_MCH	Korean_Neg_GTEx_Neg	No	X
INO80E	B_MCV	Korean_Neg_GTEx_Neg	No	X
INO80E	B_RBC_B	Korean_Pos_GTEx_Pos	No	X
INO80E	B_WAIST	Korean_Neg_GTEx_Neg	Strong	Body Mass Index (DisGeNET Gene-Phenotype)
INTS1	B_BUN	Korean_Neg	Weak	nitrogen compound metabolic process (GO Biological Process Annotations) Renal Cell Carcinoma (DisGeNET Gene-Disease) Conventional (Clear Cell) Renal Cell Carcinoma (DisGeNET Gene-Disease)
INTS1	B_CREATINE	Korean_Neg	Weak	nitrogen compound metabolic process (GO Biological Process Annotations) Renal Cell Carcinoma (DisGeNET Gene-Disease) Conventional (Clear Cell) Renal Cell Carcinoma (DisGeNET Gene-Disease)
INTS1	B_EGFR	Korean_Pos	Weak	nitrogen compound metabolic process (GO Biological Process Annotations) Renal Cell Carcinoma (DisGeNET Gene-Disease) Conventional (Clear Cell) Renal Cell Carcinoma (DisGeNET Gene-Disease)
INTS1	B_HB	Korean_Pos	No	X
INTS1	B_HCT	Korean_Pos	No	X
INTS1	B_RBC_B	Korean_Pos	No	X
IQGAP2	B_LDL	GTEx_Neg	Weak	Dyslipidemias (CTD Gene-Disease) metabolic (GAD High Level Gene-Disease) acquired metabolic disease (GWASdb SNP-Disease)
IQGAP2	B_TCHL	GTEx_Neg	Weak	Dyslipidemias (CTD Gene-Disease) metabolic (GAD High Level Gene-Disease) acquired metabolic disease (GWASdb SNP-Disease)
ITGA3	B_ALBUMIN	Korean_Pos	Strong	Albuminuria (CTD Gene-Disease) Hypoalbuminemia (DisGeNET Gene-Disease) Kidney Diseases (CTD Gene-Disease)
ITIH4	B_HB	Korean_Neg	Weak	Anemia (CTD Gene-Disease) blood platelet disease (DISEASES Text-mining Gene-Disease Assocation Evidence Scores) Blood Protein Measurement (DisGeNET Gene-Phenotype)
ITIH4	B_HCT	Korean_Neg	Strong	Anemia (CTD Gene-Disease) blood platelet disease (DISEASES Text-mining Gene-Disease Assocation Evidence Scores) Blood Protein Measurement (DisGeNET Gene-Phenotype)
ITIH4	B_HIP	Korean_Pos	Strong	Body Mass Index (DisGeNET Gene-Phenotype) Body Mass Index Procedure (DisGeNET Gene-Phenotype) Body mass index (GWAS Catalog SNP-Phenotype)
ITIH4	B_BMI	Korean_Pos_GTEx_Pos	Complete	Body Mass Index (DisGeNET Gene-Phenotype) Body Mass Index Procedure (DisGeNET Gene-Phenotype) Body mass index (GWAS Catalog SNP-Phenotype)
ITIH4	B_RBC_B	Korean_Neg_GTEx_Neg	Strong	Anemia (CTD Gene-Disease) blood platelet disease (DISEASES Text-mining Gene-Disease Assocation Evidence Scores) Blood Protein Measurement (DisGeNET Gene-Phenotype)
ITIH4	B_WAIST	Korean_Pos_GTEx_Pos	Strong	Body Mass Index (DisGeNET Gene-Phenotype) Body Mass Index Procedure (DisGeNET Gene-Phenotype) Body mass index (GWAS Catalog SNP-Phenotype)
ITIH4	B_HEIGHT	GTEx_Neg	No	X
ITPR3	B_WBC_B	Korean_Pos	Weak	Blood Coagulation Disorders (CTD Gene-Disease) Red Blood Cell Count Measurement (DisGeNET Gene-Phenotype) Anemia, Hemolytic (CTD Gene-Disease)
ITSN1	B_MCH	Korean_Pos_GTEx_Pos	Strong	Mean Corpuscular Volume (Result) (DisGeNET Gene-Phenotype) Finding Of Mean Corpuscular Hemoglobin (DisGeNET Gene-Phenotype) Red Blood Cell Count Measurement (DisGeNET Gene-Phenotype)
ITSN1	B_MCV	Korean_Pos_GTEx_Pos	Strong	Mean Corpuscular Volume (Result) (DisGeNET Gene-Phenotype) Finding Of Mean Corpuscular Hemoglobin (DisGeNET Gene-Phenotype) Red Blood Cell Count Measurement (DisGeNET Gene-Phenotype)
JAKMIP1	B_PLAT	GTEx_Pos	Strong	blood coagulation (GO Biological Process Annotations) hematologic cancer (GWASdb SNP-Disease) abnormality of blood and blood-forming tissues (GWASdb SNP-Phenotype)
KLC1	B_HCT	Korean_Pos	Weak	Hematologic Diseases (HuGE Navigator Gene-Phenotype) Anemia (CTD Gene-Disease)
KLC1	B_HB	Korean_Pos_GTEx_Pos	Weak	Hematologic Diseases (HuGE Navigator Gene-Phenotype) Anemia (CTD Gene-Disease)
KLC1	B_RBC_B	Korean_Pos_GTEx_Pos	Weak	Hematologic Diseases (HuGE Navigator Gene-Phenotype) Anemia (CTD Gene-Disease)
LINC00565	B_T_BIL	Korean_Pos	No	X
LIPC	B_HDL	Korean_Pos	Complete	High Density Lipoprotein Measurement (DisGeNET Gene-Phenotype) HIGH DENSITY LIPOPROTEIN CHOLESTEROL LEVEL QUANTITATIVE TRAIT LOCUS 12 (CTD Gene-Disease) High Density Lipoprotein Cholesterol Level Quantitative Trait (DisGeNET Gene-Phenotype)
LIPC	B_TCHL	Korean_Pos	Complete	Serum Total Cholesterol Measurement (DisGeNET Gene-Phenotype)
LIPC	B_TG	Korean_Pos	Complete	triglycerides (GeneRIF Biological Term Annotations) triglycerides (GAD Gene-Disease) Triglycerides Measurement (DisGeNET Gene-Phenotype)
LOXL2	B_MCH	Korean_Pos_GTEx_Pos	Weak	Hematologic Diseases (CTD Gene-Disease) Anemia (CTD Gene-Disease)
LRRC37A	B_MCH	Korean_Neg_GTEx_Neg	No	X
LRRC37A	B_MCV	GTEx_Neg	No	X
LRRC37A	B_RBC_B	GTEx_Pos	No	X
LRRC37A2	B_MCH	Korean_Neg	No	X
LRWD1	B_MAP	Korean_Pos_GTEx_Pos	No	X
LRWD1	B_SBP	Korean_Pos_GTEx_Pos	No	X
LST1	B_PLAT	Korean_Pos	Weak	Hematologic Diseases (HuGE Navigator Gene-Phenotype)
LTBP3	B_HDL	Korean_Neg	Weak	inherited metabolic disorder (DISEASES Text-mining Gene-Disease Assocation Evidence Scores) metabolic (GAD High Level Gene-Disease Associations)
LY75	B_WBC_B	Korean_Pos_GTEx_Pos	Complete	White Blood Cell Count Procedure DisGeNET Gene-Phenotype
M6PR	B_TCHL	GTEx_Pos	Complete	Serum Total Cholesterol Measurement DisGeNET Gene-Phenotype
MACF1	B_DM	Korean_Pos	Complete	Diabetes Mellitus (DisGeNET Gene-Disease) Diabetes Mellitus (CTD Gene-Disease) Diabetes Mellitus, Type 2 (HuGE Navigator Gene-Phenotype)
MACF1	B_HDL	Korean_Neg	Complete	lipoproteins, hdl (GAD Gene-Disease) High Density Lipoprotein Measurement (DisGeNET Gene-Phenotype) Lipoproteins, HDL (dbGAP Gene-Trait)
MAN1A2	B_BMI	Korean_Pos	No	X
MAN2A2	B_GLU0	GTEx_Pos	No	X
MAN2C1	B_HBA1C	Korean_Neg_GTEx_Neg	Strong	Type 2 diabetes mellitus_Renal Tissue_GSE642 (GEO Signatures of Differentially Expressed Genes for Diseases) Type 2 diabetes mellitus_Hepatic Tissue_GSE2899 (GEO Signatures of Differentially Expressed Genes for Diseases) inherited metabolic disorder (DISEASES Text-mining Gene-Disease Assocation Evidence Scores)
MAN2C1	B_HEIGHT	Korean_Pos_GTEx_Pos	No	X
MAP3K11	B_R_GTP	Korean_Neg	Strong	Liver Carcinoma (DisGeNET Gene-Disease) Fatty Liver Disease (DisGeNET Gene-Disease) liver cancer cell (TISSUES Text-mining Tissue Protein Expression Evidence Scores)
MAPKAP1	B_HTN	Korean_Neg	Complete	Hypertension (HuGE Navigator Gene-Phenotype) Hypertension (CTD Gene-Disease) Mean Blood Pressure (DisGeNET Gene-Phenotype)
MASTL	B_MCV	GTEx_Neg	Weak	blood platelet (TISSUES Text-mining Tissue Protein Expression Evidence Scores) abnormality of blood and blood-forming tissues (HPO Gene-Disease) blood coagulation disease (DISEASES Text-mining Gene-Disease Assocation Evidence Scores)
MASTL	B_RBC_B	GTEx_Pos	Weak	blood platelet (TISSUES Text-mining Tissue Protein Expression Evidence Scores) abnormality of blood and blood-forming tissues (HPO Gene-Disease) blood coagulation disease (DISEASES Text-mining Gene-Disease Assocation Evidence Scores)
MED22	B_HB	Korean_Pos_GTEx_Pos	No	X
MED22	B_HCT	Korean_Pos_GTEx_Pos	No	X
MED22	B_LDL	Korean_Neg_GTEx_Neg	Weak	Metabolism of lipids and lipoproteins (Reactome Pathways)
MED22	B_RBC_B	Korean_Pos_GTEx_Pos	No	X
MED22	B_TCHL	Korean_Neg_GTEx_Neg	No	X
MED24	B_MCV	Korean_Neg	Weak	abnormal blood cell morphology/development (MPO Gene-Phenotype) abnormal blood vessel morphology (MPO Gene-Phenotype) abnormality of blood and blood-forming tissues (GWASdb SNP-Phenotype)
MED24	B_WAIST	Korean_Neg	Weak	Dyslipidemias (CTD Gene-Disease) Metabolism of lipids and lipoproteins (Reactome Pathways)
MED24	B_WBC_B	Korean_Neg	Complete	wbc (GeneRIF Biological Term Annotations) abnormal blood cell morphology/development (MPO Gene-Phenotype) anemia (MPO Gene-Phenotype)
MFN2	B_PLAT	Korean_Pos_GTEx_Pos	Complete	Platelet Count Measurement (DisGeNET Gene-Phenotype) Platelet counts (GWAS Catalog SNP-Phenotype) abnormal platelet count (GWASdb SNP-Phenotype)
MICA	B_HEIGHT	Korean_Pos	Complete	Body Height (DisGeNET Gene-Phenotype) Height (DisGeNET Gene-Phenotype) Height (GWAS Catalog SNP-Phenotype)
MICA	B_TG	Korean_Pos	Weak	lipid (GeneRIF Biological Term Annotations) acquired metabolic disease (GWASdb SNP-Disease) acquired metabolic disease (DISEASES Experimental Gene-Disease Assocation Evidence Scores)
MICA	B_WBC_B	GTEx_Neg	Weak	abnormality of blood and blood-forming tissues (GWASdb SNP-Phenotype)
MICB	B_WBC_B	Korean_Neg	Weak	abnormality of blood and blood-forming tissues (GWASdb SNP-Phenotype)
MINK1	B_PLAT	Korean_Neg	Complete	blood platelet (TISSUES Curated Tissue Protein Expression Evidence Scores)
MLH3	B_HEIGHT	GTEx_Neg	No	X
MT2A	B_HDL	Korean_Pos	Strong	Hypercholesterolemia (CTD Gene-Disease) Hyperlipidemias (CTD Gene-Disease) Dyslipidemias (CTD Gene-Disease)
MUC20	B_HBA1C	GTEx_Neg	No	X
MUC20	B_MCH	GTEx_Pos	No	X
MUC20	B_MCHC	GTEx_Pos	No	X
MUC20	B_MCV	GTEx_Pos	No	X
MYBPC3	B_ALBUMIN	Korean_Pos_GTEx_Pos	Weak	abnormal protein level (MPO Gene-Phenotype)
MYRF	B_GLU0	Korean_Neg	Complete	Fasting Blood Glucose Measurement (DisGeNET Gene-Phenotype) glucose metabolism disease (GWASdb SNP-Disease) abnormal glucose homeostasis (GWASdb SNP-Phenotype)
MYRF	B_HB	Korean_Pos	Complete	Hemoglobin Measurement (DisGeNET Gene-Phenotype) Anemia (CTD Gene-Disease)
MYRF	B_LDL	Korean_Neg	Complete	Low Density Lipoprotein Cholesterol Measurement (DisGeNET Gene-Phenotype) Lipoproteins, LDL (dbGAP Gene-Trait) lipoproteins, ldl (GAD Gene-Disease)
MYRF	B_PLAT	Korean_Pos	Weak	Red Blood Cell Count Measurement (DisGeNET Gene-Phenotype) Anemia (CTD Gene-Disease)
MYRF	B_TG	Korean_Pos	Complete	Triglycerides Measurement (DisGeNET Gene-Phenotype)
NDFIP1	B_PLAT	Korean_Pos_GTEx_Neg	Complete	Platelet Count Measurement (DisGeNET Gene-Phenotype) Blood Coagulation Disorders (CTD Gene-Disease)
NECTIN2	B_HDL	Korean_Pos_GTEx_Pos	Complete	Serum Hdl Cholesterol Measurement (DisGeNET Gene-Phenotype) High Density Lipoprotein Measurement (DisGeNET Gene-Phenotype) Hyperlipidemia (DisGeNET Gene-Disease)
NFATC1	B_CREATINE	Korean_Neg	Complete	Creatinine Measurement, Serum (Procedure) (DisGeNET Gene-Phenotype) Kidney Diseases (CTD Gene-Disease) kidney disease (DISEASES Text-mining Gene-Disease Assocation Evidence Scores)
NFATC1	B_EGFR	Korean_Pos	Complete	Glomerular Filtration Rate (DisGeNET Gene-Phenotype) Creatinine Measurement, Serum (Procedure) (DisGeNET Gene-Phenotype) Kidney Diseases (CTD Gene-Disease)
NIPSNAP3A	B_HDL	Korean_Neg_GTEx_Pos	Complete	High Density Lipoprotein Measurement (DisGeNET Gene-Phenotype) Hypoalphalipoproteinemia, Familial (DisGeNET Gene-Disease) hypolipoproteinemia (DISEASES Text-mining Gene-Disease Assocation Evidence Scores)
NIPSNAP3A	B_TCHL	GTEx_Pos	Weak	inherited metabolic disorder DISEASES Text-mining Gene-Disease Assocation Evidence Scores
NME4	B_PLAT	Korean_Neg	Weak	abnormality of blood and blood-forming tissues (GWASdb SNP-Phenotype) hematological neoplasm (GWASdb SNP-Phenotype)
NPRL3	B_MCH	Korean_Neg	Complete	Mean corpuscular hemoglobin GWAS Catalog SNP-Phenotype Finding Of Mean Corpuscular Hemoglobin DisGeNET Gene-Phenotype Mean Corpuscular Volume (Result) DisGeNET Gene-Phenotype
NPRL3	B_MCV	Korean_Neg	Complete	Mean Corpuscular Volume (Result) DisGeNET Gene-Phenotype Mean corpuscular hemoglobin GWAS Catalog SNP-Phenotype Finding Of Mean Corpuscular Hemoglobin DisGeNET Gene-Phenotype
NPRL3	B_RBC_B	Korean_Pos	Complete	Red Blood Cell Count Measurement (DisGeNET Gene-Phenotype) Red blood cell traits (GWAS Catalog SNP-Phenotype) Finding Of Mean Corpuscular Hemoglobin (DisGeNET Gene-Phenotype)
NR1D1	B_WBC_B	Korean_Pos	Complete	White Blood Cell Count Procedure (DisGeNET Gene-Phenotype)
NRG1	B_THYCA	Korean_Neg	Complete	Thyroid cancer (GWAS Catalog SNP-Phenotype) thyroid cancer (GWASdb SNP-Disease) thyroid cancer (DISEASES Experimental Gene-Disease Assocation Evidence Scores)
NRG1	B_CREATINE	GTEx_Neg	Strong	kidney disease (GWASdb SNP-Disease) kidney disease (DISEASES Experimental Gene-Disease Assocation Evidence Scores) Kidney Diseases (CTD Gene-Disease Associations)
NRG1	B_EGFR	GTEx_Pos	Complete	Glomerular Filtration Rate (DisGeNET Gene-Phenotype) kidney disease (DISEASES Experimental Gene-Disease Assocation Evidence Scores) Kidney Diseases (CTD Gene-Disease Associations)
NSG1	B_ALBUMIN	Korean_Pos	Strong	Kidney Diseases (CTD Gene-Disease) Liver Diseases (CTD Gene-Disease)
NSG1	B_LDL	Korean_Pos	No	X
NSG1	B_TCHL	Korean_Pos	No	X
NSG1	B_TG	Korean_Pos	No	X
NT5C2	B_HTN	Korean_Neg_GTEx_Neg	Complete	hypertension (GAD Gene-Disease) Hypertension (CTD Gene-Disease) Hypertension (HuGE Navigator Gene-Phenotype)
NT5C2	B_BMI	Korean_Pos	Complete	Body Mass Index (DisGeNET Gene-Phenotype) Body Mass Index Procedure (DisGeNET Gene-Phenotype) Finding Of Body Mass Index (DisGeNET Gene-Phenotype)
NT5C2	B_DBP	Korean_Neg_GTEx_Neg	Strong	Mean Blood Pressure (DisGeNET Gene-Phenotype) systolic blood pressure (GAD Gene-Disease) Blood Pressure (DisGeNET Gene-Phenotype)
NT5C2	B_HIP	Korean_Pos_GTEx_Pos	Strong	Body Mass Index (DisGeNET Gene-Phenotype) Body Mass Index Procedure (DisGeNET Gene-Phenotype) Finding Of Body Mass Index (DisGeNET Gene-Phenotype)
NT5C2	B_MAP	Korean_Neg_GTEx_Neg	Complete	Mean Blood Pressure (DisGeNET Gene-Phenotype) systolic blood pressure (GAD Gene-Disease) Blood Pressure (DisGeNET Gene-Phenotype)
NT5C2	B_WBC_B	Korean_Neg_GTEx_Neg	Weak	abnormality of blood and blood-forming tissues (GWASdb SNP-Phenotype)
NT5C2	B_SBP	Korean_Neg_GTEx_Neg	Complete	systolic blood pressure (GAD Gene-Disease) Mean Blood Pressure (DisGeNET Gene-Phenotype) Blood Pressure (DisGeNET Gene-Phenotype)
NT5DC2	B_BMI	Korean_Neg_GTEx_Neg	Weak	Hyperlipidemias (CTD Gene-Disease)
NT5DC2	B_HCT	Korean_Pos_GTEx_Pos	No	X
NT5DC2	B_HEIGHT	Korean_Pos_GTEx_Pos	No	X
NT5DC2	B_RBC_B	Korean_Pos_GTEx_Pos	Weak	Anemia (CTD Gene-Disease)
NT5DC2	B_HB	GTEx_Pos	Weak	Anemia (CTD Gene-Disease) Blood Coagulation Disorders (CTD Gene-Disease)
ODF3B	B_MCH	GTEx_Pos	Strong	Mean corpuscular volume (GWAS Catalog SNP-Phenotype) Red blood cell traits (GWAS Catalog SNP-Phenotype)
ODF3B	B_MCV	GTEx_Pos	Complete	Mean corpuscular volume (GWAS Catalog SNP-Phenotype) Red blood cell traits (GWAS Catalog SNP-Phenotype)
ODF3B	B_RBC_B	GTEx_Neg	Strong	Mean corpuscular volume (GWAS Catalog SNP-Phenotype) Red blood cell traits (GWAS Catalog SNP-Phenotype)
PAG1	B_ALBUMIN	Korean_Pos	Strong	Kidney Diseases (CTD Gene-Disease) Chronic Kidney Disease (DisGeNET Gene-Disease) Liver Carcinoma (DisGeNET Gene-Disease)
PAQR6	B_TG	Korean_Pos	No	X
PAQR6	B_HBA1C	Korean_Pos_GTEx_Pos	No	X
PAQR6	B_MCV	Korean_Neg_GTEx_Neg	Weak	Anemia (CTD Gene-Disease) Blood Coagulation Disorders (CTD Gene-Disease)
PAQR6	B_RBC_B	GTEx_Pos	Weak	Anemia (CTD Gene-Disease) Blood Coagulation Disorders (CTD Gene-Disease)
PAX8	B_BUN	Korean_Neg_GTEx_Neg	Complete	Blood Urea Nitrogen Measurement (DisGeNET Gene-Phenotype)
PCMTD1	B_HEIGHT	GTEx_Neg	Strong	abnormality of body height (GWASdb SNP-Phenotype)
PDIA5	B_PLAT	Korean_Pos	Complete	Platelet Count Measurement (DisGeNET Gene-Phenotype) Platelet counts (GWAS Catalog SNP-Phenotype) abnormal platelet count (GWASdb SNP-Phenotype)
PDK1	B_GLU0	Korean_Pos	Complete	glucose (GeneRIF Biological Term Annotations) Glucose (CTD Gene-Chemical Interactions) Glucose Intolerance (CTD Gene-Disease)
PDK2	B_GASTRO	Korean_Pos	No	X
PEAR1	B_HBA1C	GTEx_Neg	No	X
PEAR1	B_MCV	GTEx_Pos	Weak	White Blood Cell Count Procedure (DisGeNET Gene-Phenotype) Blood Protein Measurement (DisGeNET Gene-Phenotype) blood platelet (TISSUES Text-mining Tissue Protein Expression Evidence Scores)
PEAR1	B_RBC_B	GTEx_Neg	Weak	White Blood Cell Count Procedure (DisGeNET Gene-Phenotype) Blood Protein Measurement (DisGeNET Gene-Phenotype) blood platelet (TISSUES Text-mining Tissue Protein Expression Evidence Scores)
PLOD1	B_PLAT	GTEx_Pos	Complete	Platelet Count Measurement (DisGeNET Gene-Phenotype)
PLXND1	B_HIP	GTEx_Neg	Complete	Hip Circumference (DisGeNET Gene-Phenotype)
PNKD	B_WBC_B	GTEx_Pos	Complete	White Blood Cell Count Procedure (DisGeNET Gene-Phenotype)
POLR2E	B_MCHC	Korean_Neg	Weak	Hematologic Diseases (HuGE Navigator Gene-Phenotype) Anemia (CTD Gene-Disease)
POLR2J2	B_HEIGHT	Korean_Pos	No	X
POU5F1	B_PLAT	Korean_Pos	Weak	abnormality of blood and blood-forming tissues (GWASdb SNP-Phenotype)
POU5F1	B_TG	Korean_Pos	Strong	Hypertriglyceridemia (CTD Gene-Disease) Dyslipidemias (CTD Gene-Disease)
PPM1M	B_ALBUMIN	Korean_Neg	Strong	Kidney Diseases (CTD Gene-Disease) Liver Diseases (CTD Gene-Disease)
PRELID1	B_AST	Korean_Neg_GTEx_Neg	No	X
PRELID1	B_HDL	GTEx_Neg	No	X
PROCA1	B_MCH	GTEx_Neg	No	X
PRSS57	B_HEIGHT	GTEx_Pos	No	X
PSTPIP2	B_MCH	Korean_Pos_GTEx_Neg	Weak	Anemia (CTD Gene-Disease)
PSTPIP2	B_MCHC	Korean_Pos_GTEx_Neg	Weak	Anemia (CTD Gene-Disease)
PTK7	B_HEIGHT	Korean_Pos	No	X
RAB24	B_AST	Korean_Neg	Strong	Liver Diseases (CTD Gene-Disease) Liver Carcinoma (DisGeNET Gene-Disease) Liver Neoplasms (CTD Gene-Disease)
RAB24	B_GLU0	Korean_Pos	Strong	Glucose Intolerance (CTD Gene-Disease)
RBL2	B_HDL	Korean_Neg	Strong	Hypercholesterolemia (CTD Gene-Disease) Hyperlipidemias (CTD Gene-Disease) metabolic (GAD High Level Gene-Disease)
RBM44	B_ARTH	GTEx_Neg	No	X
RBPMS2	B_TG	Korean_Neg	No	X
RBPMS2	B_WBC_B	Korean_Neg	No	X
RGS10	B_MCHC	Korean_Neg	Weak	Hematologic Diseases (CTD Gene-Disease) Anemia (CTD Gene-Disease)
RGS12	B_ALBUMIN	Korean_Neg_GTEx_Neg	Complete	Serum Albumin Measurement (DisGeNET Gene-Phenotype) Kidney Diseases (CTD Gene-Disease) Liver Diseases (CTD Gene-Disease)
RGS12	B_TG	Korean_Neg_GTEx_Neg	No	X
RGS12	B_HEIGHT	GTEx_Pos	Complete	Body Height (DisGeNET Gene-Phenotype)
RHD	B_TCHL	Korean_Neg	Weak	inherited metabolic disorder (DISEASES Text-mining Gene-Disease Assocation Evidence Scores)
RHD	B_HBA1C	Korean_Neg_GTEx_Neg	Strong	hemoglobinuria (DISEASES Text-mining Gene-Disease Assocation Evidence Scores) diabetes (GeneRIF Biological Term Annotations) inherited metabolic disorder (DISEASES Text-mining Gene-Disease Assocation Evidence Scores)
RMDN1	B_EGFR	Korean_Pos	Strong	Kidney Diseases (CTD Gene-Disease)
RP11-1143G9.5	B_TG	GTEx_Pos	No	X
RP11-817O13.8	B_HBA1C	Korean_Neg	No	X
RP11-817O13.8	B_HEIGHT	Korean_Pos_GTEx_Pos	No	X
RPH3A	B_HTN	Korean_Pos	Complete	hypertension (GWASdb SNP-Disease)
RPH3A	B_ALBUMIN	Korean_Pos	Complete	Albuminuria (dbGAP Gene-Trait) albuminuria (GAD Gene-Disease) kidney disease (GWASdb SNP-Disease)
RPH3A	B_AST	Korean_Pos_GTEx_Pos	No	X
RPH3A	B_DBP	Korean_Pos_GTEx_Pos	No	X
RPH3A	B_GLU0	Korean_Pos_GTEx_Pos	Strong	glucose (Phosphosite Textmining Biological Term Annotations) Type 2 diabetes mellitus_Muscle tissue_GSE12643 (GEO Signatures of Differentially Expressed Genes for Diseases) metabolic (GAD High Level Gene-Disease)
RPH3A	B_HDL	Korean_Pos_GTEx_Pos	Complete	High Density Lipoprotein Measurement (DisGeNET Gene-Phenotype) abnormality of the level of lipoprotein cholesterol (GWASdb SNP-Phenotype) metabolic (GAD High Level Gene-Disease)
RPH3A	B_MAP	Korean_Pos_GTEx_Pos	No	X
RPH3A	B_R_GTP	Korean_Pos_GTEx_Pos	No	X
RPH3A	B_WAIST	Korean_Pos_GTEx_Pos	Strong	Body Mass Index (DisGeNET Gene-Phenotype)
RPH3A	B_SBP	Korean_Pos_GTEx_Pos	No	X
RPL10A	B_HEIGHT	Korean_Neg	No	X
RPL27A	B_BMI	Korean_Neg	No	X
RPS26	B_HEIGHT	Korean_Neg_GTEx_Neg	Strong	abnormality of body height (HPO Gene-Disease)
RYK	B_HEIGHT	Korean_Pos	Complete	Body Height (DisGeNET Gene-Phenotype)
SCARB1	B_T_BIL	Korean_Pos	Complete	Bilirubin Measurement (DisGeNET Gene-Phenotype) Hyperbilirubinemia (CTD Gene-Disease) Liver Diseases (CTD Gene-Disease)
SCARB1	B_HDL	Korean_Pos_GTEx_Pos	Complete	High Density Lipoprotein Cholesterol Level Quantitative Trait (DisGeNET Gene-Phenotype) hdlcholesterol (GeneRIF Biological Term Annotations) Serum Hdl Cholesterol Measurement (DisGeNET Gene-Phenotype)
SCCPDH	B_LDL	GTEx_Neg	No	X
SCCPDH	B_TCHL	GTEx_Neg	No	X
SCFD1	B_RBC_B	Korean_Neg_GTEx_Neg	Weak	Blood Protein Measurement (DisGeNET Gene-Phenotype) blood platelet (TISSUES Curated Tissue Protein Expression Evidence Scores)
SERINC2	B_ALT	Korean_Pos	Strong	Liver Diseases (CTD Gene-Disease) Liver Failure, Acute (CTD Gene-Disease) Liver Carcinoma (DisGeNET Gene-Disease)
SERPINF2	B_ALBUMIN	Korean_Neg_GTEx_Neg	Complete	Serum Albumin Measurement DisGeNET Gene-Phenotype Hyperlipoproteinemia (DisGeNET Gene-Disease)
SH3BGRL3	B_PLAT	Korean_Neg_GTEx_Pos	Strong	Blood Coagulation Disorders (CTD Gene-Disease) Anemia (CTD Gene-Disease)
SH3BP1	B_ALBUMIN	Korean_Pos	Strong	Kidney Diseases (CTD Gene-Disease) Liver Diseases (CTD Gene-Disease) Liver Carcinoma (DisGeNET Gene-Disease)
SIDT2	B_HTN	Korean_Neg	Complete	Hypertension_Adrenal gland_GSE1674 (GEO Signatures of Differentially Expressed Genes for Diseases)
SIDT2	B_TG	GTEx_Neg	Complete	Triglycerides Measurement (DisGeNET Gene-Phenotype) inherited metabolic disorder (GWASdb SNP-Disease)
SKIV2L	B_PLAT	GTEx_Pos	Strong	blood platelet (TISSUES Curated Tissue Protein Expression Evidence Scores) Increased Mean Platelet Volume (DisGeNET Gene-Phenotype)
SLC20A2	B_HB	GTEx_Neg	Strong	Corpuscular Hemoglobin Concentration Mean (DisGeNET Gene-Phenotype) Anemia (CTD Gene-Disease)
SLC20A2	B_HBA1C	GTEx_Pos	Strong	type 2 diabetes mellitus (GWASdb SNP-Disease) inherited metabolic disorder (DISEASES Text-mining Gene-Disease Assocation Evidence Scores)
SLC20A2	B_MCHC	GTEx_Neg	Complete	Corpuscular Hemoglobin Concentration Mean (DisGeNET Gene-Phenotype) Anemia (CTD Gene-Disease) Mean Corpuscular Volume (Result) (DisGeNET Gene-Phenotype)
SLC20A2	B_MCV	GTEx_Pos	Complete	Mean Corpuscular Volume (Result) (DisGeNET Gene-Phenotype) Corpuscular Hemoglobin Concentration Mean (DisGeNET Gene-Phenotype) Anemia (CTD Gene-Disease)
SLC22A18	B_MCHC	Korean_Neg	Weak	Blood Coagulation Disorders (CTD Gene-Disease) Anemia (CTD Gene-Disease)
SLC25A21	B_MCH	Korean_Pos	Strong	hemoglobins (GAD Gene-Disease) Hemoglobins (dbGAP Gene-Trait) Anemia (CTD Gene-Disease)
SLC25A21	B_MCV	Korean_Pos	Weak	hematological (GAD High Level Gene-Disease) abnormal blood cell morphology/development (MPO Gene-Phenotype) Anemia (CTD Gene-Disease)
SLIT1	B_WBC_B	GTEx_Neg	No	X
SMG5	B_HBA1C	Korean_Pos_GTEx_Pos	No	X
SMG5	B_MCV	Korean_Neg_GTEx_Neg	Strong	Rdw - Red Blood Cell Distribution Width Result (DisGeNET Gene-Phenotype)
SMG5	B_RBC_B	Korean_Pos_GTEx_Pos	Strong	Rdw - Red Blood Cell Distribution Width Result (DisGeNET Gene-Phenotype)
SMG5	B_TG	GTEx_Pos	No	X
SPATA5L1	B_CREATINE	Korean_Pos_GTEx_Pos	Complete	Creatinine Measurement, Serum (Procedure) (DisGeNET Gene-Phenotype) Creatinine (dbGAP Gene-Trait) creatinine (GAD Gene-Disease)
SPATA5L1	B_EGFR	Korean_Neg_GTEx_Neg	Complete	Glomerular Filtration Rate DisGeNET Gene-Phenotype Creatinine Measurement, Serum (Procedure) (DisGeNET Gene-Phenotype) creatinine (GAD Gene-Disease)
SPON1	B_HEIGHT	Korean_Neg	Complete	Body Height DisGeNET (Gene-Phenotype)
SRP14	B_R_GTP	Korean_Pos_GTEx_Pos	No	X
SSH2	B_WBC_B	Korean_Pos_GTEx_Pos	Complete	White Blood Cell Count Procedure (DisGeNET Gene-Phenotype)
ST5	B_HB	Korean_Pos	Weak	Anemia (CTD Gene-Disease) Anemia, Hemolytic (CTD Gene-Disease) sickle cell anemia (DISEASES Text-mining Gene-Disease Assocation Evidence Scores)
SURF6	B_HB	GTEx_Pos	No	hematologic cancer (DISEASES Text-mining Gene-Disease Assocation Evidence Scores)
SURF6	B_HCT	GTEx_Pos	No	hematologic cancer (DISEASES Text-mining Gene-Disease Assocation Evidence Scores)
SURF6	B_LDL	GTEx_Neg	No	X
SURF6	B_RBC_B	GTEx_Pos	No	hematologic cancer (DISEASES Text-mining Gene-Disease Assocation Evidence Scores)
SURF6	B_TCHL	GTEx_Neg	No	X
SUSD1	B_HDL	GTEx_Pos	Weak	acquired metabolic disease (GWASdb SNP-Disease)
SUSD2	B_HTN	Korean_Pos	Complete	Hypertension (CTD Gene-Disease)
SYNJ2	B_R_GTP	Korean_Neg	Complete	Serum Gamma-Glutamyl Transferase Measurement (DisGeNET Gene-Phenotype) Liver Diseases (CTD Gene-Disease)
TAGLN	B_HDL	Korean_Neg_GTEx_Neg	Complete	High Density Lipoprotein Measurement (DisGeNET Gene-Phenotype) Serum Ldl Cholesterol Measurement (DisGeNET Gene-Phenotype)
TBC1D14	B_PLAT	GTEx_Pos	Complete	Platelet Count Measurement (DisGeNET Gene-Phenotype) Platelet Mean Volume Determination (Procedure) (DisGeNET Gene-Phenotype)
TBCD	B_HBA1C	Korean_Neg	Strong	type 2 diabetes mellitus (GWASdb SNP-Disease) Type 2 diabetes mellitus_Endocrine Pancreas - Islet Cell of Langerhans - Beta Cell (MMHCC)_GSE6428 (GEO Signatures of Differentially Expressed Genes for Diseases)
TC2N	B_HEIGHT	GTEx_Pos	Complete	Body Height (DisGeNET Gene-Phenotype)
THRA	B_WBC_B	Korean_Pos	Weak	hematologic cancer (DISEASES Text-mining Gene-Disease Assocation Evidence Scores) abnormal blood cell physiology (MPO Gene-Phenotype) abnormal blood cell morphology/development (MPO Gene-Phenotype)
TMC8	B_HBA1C	GTEx_Pos	No	X
TMEM110	B_BMI	Korean_Pos_GTEx_Pos	No	X
TMEM110	B_RBC_B	Korean_Neg_GTEx_Neg	No	X
TMEM110	B_WAIST	Korean_Pos_GTEx_Pos	No	X
TMEM110	B_HB	GTEx_Neg	No	X
TMEM110	B_HCT	GTEx_Neg	No	X
TMEM121	B_ALBUMIN	GTEx_Pos	No	X
TMEM171	B_HB	Korean_Neg	No	Rdw - Red Blood Cell Distribution Width Result (DisGeNET Gene-Phenotype)
TMEM171	B_MCH	Korean_Neg	Weak	Rdw - Red Blood Cell Distribution Width Result (DisGeNET Gene-Phenotype)
TMEM171	B_MCHC	Korean_Neg	Weak	Rdw - Red Blood Cell Distribution Width Result (DisGeNET Gene-Phenotype)
TMEM50A	B_HBA1C	Korean_Neg	Weak	Type 2 diabetes mellitus_Endocrine Pancreas - Islet Cell of Langerhans - Beta Cell (MMHCC)_GSE6428 (GEO Signatures of Differentially Expressed Genes for Diseases)
TMEM91	B_HEIGHT	GTEx_Pos	No	X
TREML4	B_MCH	Korean_Pos	No	X
TREML4	B_MCV	Korean_Pos	No	X
TREML4	B_RBC_B	Korean_Neg	No	X
TRIM58	B_MCHC	GTEx_Neg	Complete	Corpuscular Hemoglobin Concentration Mean (DisGeNET Gene-Phenotype) Mean Corpuscular Volume (Result) (DisGeNET Gene-Phenotype) Finding Of Mean Corpuscular Hemoglobin (DisGeNET Gene-Phenotype)
TRIM58	B_MCV	GTEx_Pos	Complete	Mean Corpuscular Volume (Result) (DisGeNET Gene-Phenotype) Corpuscular Hemoglobin Concentration Mean (DisGeNET Gene-Phenotype) Finding Of Mean Corpuscular Hemoglobin (DisGeNET Gene-Phenotype)
TRIM58	B_PLAT	GTEx_Pos	Complete	Platelet Count Measurement (DisGeNET Gene-Phenotype) abnormal platelet count (GWASdb SNP-Phenotype) Platelet counts (GWAS Catalog SNP-Phenotype)
TRIM58	B_RBC_B	GTEx_Neg	Complete	Red Blood Cell Count Measurement (DisGeNET Gene-Phenotype) Red blood cell traits (GWAS Catalog SNP-Phenotype) Rdw - Red Blood Cell Distribution Width Result (DisGeNET Gene-Phenotype)
TUFM	B_ALLER	GTEx_Neg	No	X
TYMP	B_MCH	Korean_Pos_GTEx_Pos	Complete	Finding Of Mean Corpuscular Hemoglobin (DisGeNET Gene-Phenotype) Mean corpuscular hemoglobin (GWAS Catalog SNP-Phenotype) Red Blood Cell Count Measurement (DisGeNET Gene-Phenotype)
TYMP	B_MCV	Korean_Pos_GTEx_Pos	Strong	Finding Of Mean Corpuscular Hemoglobin (DisGeNET Gene-Phenotype) Mean corpuscular hemoglobin (GWAS Catalog SNP-Phenotype) Red Blood Cell Count Measurement (DisGeNET Gene-Phenotype)
TYMP	B_RBC_B	Korean_Neg_GTEx_Neg	Complete	Red Blood Cell Count Measurement (DisGeNET Gene-Phenotype) Finding Of Mean Corpuscular Hemoglobin (DisGeNET Gene-Phenotype) Mean corpuscular hemoglobin (GWAS Catalog SNP-Phenotype)
UBA7	B_BMI	Korean_Neg_GTEx_Neg	No	X
UBE2Z	B_HEIGHT	Korean_Pos_GTEx_Pos	Complete	Body Height (DisGeNET Gene-Phenotype)
UHRF1BP1	B_HDL	Korean_Neg_GTEx_Neg	No	X
ULK4	B_BUN	Korean_Pos_GTEx_Pos	Strong	kidney disease (GWASdb SNP-Disease)
PosB1	B_R_GTP	Korean_Pos_GTEx_Pos	Strong	Liver Diseases (CTD Gene-Disease) Liver Cirrhosis (CTD Gene-Disease) Liver Carcinoma (DisGeNET Gene-Disease)
USP40	B_T_BIL	Korean_Pos	Complete	Bilirubin Measurement (DisGeNET Gene-Phenotype) Bilirubin Level Result (DisGeNET Gene-Phenotype) Bilirubin levels (GWAS Catalog SNP-Phenotype)
UVSSA	B_DM	GTEx_Neg	Complete	Diabetes Mellitus (DisGeNET Gene-Disease) type ii diabetes mellitus (GWASdb SNP-Phenotype) type 2 diabetes mellitus (GWASdb SNP-Disease)
UVSSA	B_GLU0	GTEx_Neg	Strong	glucose metabolism disease (GWASdb SNP-Disease) abnormal glucose homeostasis (GWASdb SNP-Phenotype)
VARS2	B_CREATINE	GTEx_Neg	Strong	Kidney Diseases (CTD Gene-Disease) Kidney Neoplasms (CTD Gene-Disease)
VARS2	B_PLAT	GTEx_Pos	Weak	hematologic cancer (GWASdb SNP-Disease) hematological neoplasm (GWASdb SNP-Phenotype) abnormality of blood and blood-forming tissues (GWASdb SNP-Phenotype)
VPS13C	B_HEIGHT	Korean_Pos_GTEx_Pos	No	X
WDR45B	B_HBA1C	GTEx_Pos	No	X
WIPF2	B_WBC_B	GTEx_Neg	No	X
WIPI1	B_GLU0	GTEx_Pos	Strong	glucose metabolism disease (GWASdb SNP-Disease) abnormal glucose homeostasis (GWASdb SNP-Phenotype)
YPEL3	B_BMI	Korean_Pos_GTEx_Pos	Weak	Dyslipidemias (CTD Gene-Disease)
YPEL3	B_HIP	Korean_Pos_GTEx_Pos	No	X
YPEL3	B_MCH	Korean_Pos_GTEx_Pos	Weak	Anemia (CTD Gene-Disease)
YPEL3	B_MCV	Korean_Pos_GTEx_Pos	Weak	Anemia (CTD Gene-Disease)
YPEL3	B_RBC_B	Korean_Neg_GTEx_Neg	Weak	Anemia (CTD Gene-Disease)
YPEL3	B_WAIST	Korean_Pos_GTEx_Pos	Weak	Dyslipidemias (CTD Gene-Disease)
YPEL3	B_HB	GTEx_Neg	Weak	Anemia (CTD Gene-Disease)
ZBTB38	B_HEIGHT	GTEx_Pos	Complete	Body Height (DisGeNET Gene-Phenotype) body height (GAD Gene-Disease) Body Height (dbGAP Gene-Trait)
ZBTB38	B_HIP	GTEx_Pos	Complete	Hip Circumference (DisGeNET Gene-Phenotype)
ZFP57	B_CREATINE	GTEx_Neg	No	X
ZFP57	B_EGFR	GTEx_Pos	No	X
ZFP57	B_TG	GTEx_Neg	No	X
ZFP90	B_HDL	Korean_Pos	No	X
ZNF257	B_CREATINE	Korean_Neg	No	X
ZNF367	B_PLAT	Korean_Pos	No	X
ZNF589	B_HEIGHT	GTEx_Neg	No	X
ZNF623	B_KD	Korean_Pos_GTEx_Pos	No	X
ZNF787	B_PLAT	Korean_Pos	No	X

## Sheet: Table S6
Supplementary Table 6. Summary of Harmonizome replication
	Complete	Strong	Weak	No	SUM			Explanation of replication state
Only_Korean	73	44	55	38	210			Binary phenotype (Disease, smoke)
Korean_GTEx	43	32	23	40	138			Complete: Completed Replication
Only_GTEx	37	22	17	46	122			Strong: related to another disease in same tissue and ICD-10 class or strong evidence
SUM	153	98	95	124	470			Weak: related to another disease in same tissue or some evidence
		Novel						No: No Replicated
		317
								Continuous phenotype
								Complete: Completed Replication
								Strong: related to a specific disease related to target clinical marker and related to another clinical variable belonging to the same class with target clinical marker
								Weak: related to another clinical variable belonging to the same class with target clinical marker or related to mechanisms related with clinical variable
								No: Not Replicated

## Sheet: Table S7
Supplementary Table 7. Summary of overall TWAS results (Only significant association)
Phenotype_Class	Phenotype	Phenotype_Coding	gene_name	chr	start	end	gene_type	TWAS_Z_Korean	TWAS_p_Korean	TWAS_bonf_p_Korean	TWAS_Z_GTEx	TWAS_p_GTEx	TWAS_bonf_p_GTEx	TWAS_Z_diff	Condition	Korean_CV_R2	GTEx_CV_R2	GTEx_Kor_R2	Korean_h2	Kor_AF_eas	Kor_AF_nfe	Kor_AF_diff	GTEx_AF_eas	GTEx_AF_nfe	GTEx_AF_diff	Replication
anthropometric & lifestyle	body mass index	B_BMI	HLA-DQB2	6	32756098	32763534	protein_coding	-0.140592	0.888193	1	-4.14205	3.44564e-05	0.0380399	4.00146	GTEx_Neg	0.320287	0.638368	0.0972869	0.306599	0.261614	0.211164	0.0504501	0.358003	0.358332	-0.000329318	No
anthropometric & lifestyle	body mass index	B_BMI	HECTD4	12	112160188	112382439	protein_coding	-4.45277	8.48848e-06	0.0138362	NA	NA	NA	NA	Korean_Neg	0.0898364	NA	NA	0.066577	0.362094	0.979479	-0.617386	NA	NA	NA	Complete
anthropometric & lifestyle	body mass index	B_BMI	RPL27A	11	8682411	8714759	protein_coding	-4.29584	1.74239e-05	0.028401	NA	NA	NA	NA	Korean_Neg	0.105526	0.0274253	0.0305507	0.166928	0.247747	0.253936	-0.00618952	0.229187	0.289608	-0.0604214	No
anthropometric & lifestyle	body mass index	B_BMI	INO80E	16	29995294	30005508	protein_coding	-5.64014	1.70486e-08	2.77893e-05	-4.9081	9.21438e-07	0.00101727	-0.73204	Korean_Neg_GTEx_Neg	0.0872916	0.070143	0.112234	0.083204	0.333329	0.388218	-0.0548888	0.21179	0.26533	-0.0535399	Complete
anthropometric & lifestyle	body mass index	B_BMI	NT5DC2	3	52524496	52535054	protein_coding	-5.55216	2.83058e-08	4.61384e-05	-5.11331	3.17292e-07	0.000350291	-0.43885	Korean_Neg_GTEx_Neg	0.0761879	0.160246	0.0858324	0.066309	0.382598	0.364076	0.0185221	0.378038	0.358915	0.0191231	Weak
anthropometric & lifestyle	body mass index	B_BMI	UBA7	3	49805207	49813946	protein_coding	-4.34872	1.37104e-05	0.022348	-4.32301	1.54103e-05	0.017013	-0.0257121	Korean_Neg_GTEx_Neg	0.107591	0.29444	0.138494	0.169309	0.179006	0.328832	-0.149826	0.35354	0.470382	-0.116841	No
anthropometric & lifestyle	body mass index	B_BMI	DMPK	19	45769717	45782552	protein_coding	5.17444	2.29148e-07	0.000373511	1.00349	0.31563	1	4.17096	Korean_Pos	0.0555556	0.0584776	0.078039	0.073737	0.26493	0.365118	-0.100188	0.506167	0.341107	0.16506	Weak
anthropometric & lifestyle	body mass index	B_BMI	MAN1A2	1	117367449	117528872	protein_coding	4.23381	2.30027e-05	0.0374944	NA	NA	NA	NA	Korean_Pos	0.0579542	NA	NA	0.078427	0.44937	0.306191	0.143179	NA	NA	NA	No
anthropometric & lifestyle	body mass index	B_BMI	NT5C2	10	103090611	103193306	protein_coding	5.02529	5.03761e-07	0.00082113	4.05603	4.99618e-05	0.0551578	0.969262	Korean_Pos	0.0882994	0.0410606	0.100669	0.083519	0.299391	0.110693	0.188698	0.306878	0.328479	-0.0216015	Complete
anthropometric & lifestyle	body mass index	B_BMI	ITIH4	3	52812975	52830739	protein_coding	7.31173	2.66194e-13	4.33897e-10	7.09402	1.31358e-12	1.45019e-09	0.217714	Korean_Pos_GTEx_Pos	0.38098	0.413051	0.361292	0.320714	0.312615	0.247107	0.0655087	0.592988	0.355826	0.237162	Complete
anthropometric & lifestyle	body mass index	B_BMI	TMEM110	3	52836219	52897596	protein_coding	7.1362	9.67659e-13	1.57728e-09	6.83248	8.40616e-12	9.2804e-09	0.303723	Korean_Pos_GTEx_Pos	0.122566	0.112255	0.10708	0.117992	0.282463	0.238741	0.043722	0.294216	0.382182	-0.0879668	No
anthropometric & lifestyle	body mass index	B_BMI	YPEL3	16	30092314	30096244	protein_coding	6.038	1.56726e-09	2.55463e-06	6.12303	9.22429e-10	1.01836e-06	-0.085027	Korean_Pos_GTEx_Pos	0.0758802	0.0959578	0.0812412	0.075164	0.212418	0.147696	0.0647216	0.399172	0.524699	-0.125527	Weak
anthropometric & lifestyle	height	B_HEIGHT	ARPIN	15	89895006	89912956	protein_coding	0.529996	0.596116	1	-4.69672	2.64809e-06	0.00292349	5.22672	GTEx_Neg	0.349878	0.515681	0.354887	0.482684	0.23583	0.158523	0.0773073	0.238697	0.307665	-0.068968	No
anthropometric & lifestyle	height	B_HEIGHT	CYP27A1	2	218781756	218815293	protein_coding	-3.79077	0.000150293	0.244977	-4.2825	1.85023e-05	0.0204265	0.49173	GTEx_Neg	0.0918103	0.17167	0.117247	0.087214	0.177489	0.284081	-0.106591	0.328464	0.280868	0.0475965	No
anthropometric & lifestyle	height	B_HEIGHT	ITIH4	3	52812975	52830739	protein_coding	-3.50394	0.000458683	0.747654	-4.23536	2.28439e-05	0.0252196	0.731425	GTEx_Neg	0.38098	0.413051	0.361292	0.320714	0.312615	0.247107	0.0655087	0.592988	0.355826	0.237162	No
anthropometric & lifestyle	height	B_HEIGHT	MLH3	14	75013764	75051532	protein_coding	-3.16848	0.00153298	1	-4.63138	3.63815e-06	0.00401652	1.4629	GTEx_Neg	0.14345	0.019781	0.0694215	0.108145	0.165939	0.335968	-0.170029	0.358496	0.294696	0.0637999	No
anthropometric & lifestyle	height	B_HEIGHT	PCMTD1	8	51817575	51899186	protein_coding	-3.28561	0.00101806	1	-4.13923	3.48839e-05	0.0385118	0.853617	GTEx_Neg	0.0545158	0.0449987	0.0549482	0.061648	0.235059	0.192949	0.0421104	0.359661	0.249598	0.110063	Strong
anthropometric & lifestyle	height	B_HEIGHT	ZNF589	3	48241100	48299253	protein_coding	-4.08218	4.46583e-05	0.072793	-4.31545	1.59468e-05	0.0176053	0.23327	GTEx_Neg	0.157008	0.385554	0.166696	0.271696	0.177921	0.197232	-0.0193108	0.231082	0.206602	0.0244795	No
anthropometric & lifestyle	height	B_HEIGHT	ARL17B	17	46274784	46361797	protein_coding	3.39879	0.000677171	1	4.55404	5.27045e-06	0.00581858	-1.15524	GTEx_Pos	0.137119	0.266338	0.0771091	0.154213	0.340118	0.759604	-0.419486	0.256575	0.202082	0.0544932	Complete
anthropometric & lifestyle	height	B_HEIGHT	CCDC152	5	42756801	42802360	protein_coding	NA	NA	NA	4.38592	1.15645e-05	0.0127672	NA	GTEx_Pos	0.0498665	0.0235605	0.0518031	0.062631	0.279137	0.288354	-0.0092173	0.412285	0.390742	0.0215426	No
anthropometric & lifestyle	height	B_HEIGHT	CLOCK	4	55427903	55547111	protein_coding	NA	NA	NA	4.17791	2.9451e-05	0.0325139	NA	GTEx_Pos	0.0372986	0.0146689	0.0558642	0.05158	0.378008	0.483418	-0.10541	0.351679	0.387202	-0.0355231	Complete
anthropometric & lifestyle	height	B_HEIGHT	DEF6	6	35297852	35321771	protein_coding	NA	NA	NA	6.61523	3.73316e-11	4.12141e-08	NA	GTEx_Pos	0.0417763	0.23535	0.0550018	0.101184	0.271125	0.248793	0.0223316	0.417532	0.441002	-0.02347	Complete
anthropometric & lifestyle	height	B_HEIGHT	HLA-DRB1	6	32578769	32589848	protein_coding	1.09632	0.272944	1	5.21084	1.88453e-07	0.000208052	-4.11453	GTEx_Pos	0.668791	0.17682	0.190039	0.5911	0.233385	0.230848	0.00253692	0.205166	0.241154	-0.0359876	No
anthropometric & lifestyle	height	B_HEIGHT	PRSS57	19	685546	695498	protein_coding	2.07277	0.0381974	1	4.2016	2.65324e-05	0.0292918	-2.12884	GTEx_Pos	0.0556922	0.0528642	0.0607919	0.094442	0.205828	0.208233	-0.00240446	0.0189204	0.118004	-0.0990837	No
anthropometric & lifestyle	height	B_HEIGHT	RGS12	4	3314147	3439913	protein_coding	4.01747	5.88811e-05	0.0959761	4.09687	4.19193e-05	0.0462789	-0.0794003	GTEx_Pos	0.0832874	0.046738	0.0788903	0.158491	0.348487	0.380434	-0.0319475	0.275802	0.223623	0.0521791	Complete
anthropometric & lifestyle	height	B_HEIGHT	TC2N	14	91779751	91867536	protein_coding	3.92126	8.8162e-05	0.143704	4.55356	5.2825e-06	0.00583188	-0.632298	GTEx_Pos	0.169449	0.148397	0.196236	0.27762	0.178405	0.138732	0.0396731	0.229136	0.231573	-0.00243683	Complete
anthropometric & lifestyle	height	B_HEIGHT	TMEM91	19	41350911	41384083	protein_coding	4.10324	4.07803e-05	0.0664718	4.12861	3.65335e-05	0.0403329	-0.025366	GTEx_Pos	0.148918	0.220842	0.135589	0.132675	0.394941	0.380502	0.014439	0.297365	0.432271	-0.134907	No
anthropometric & lifestyle	height	B_HEIGHT	ZBTB38	3	141324213	141449792	protein_coding	NA	NA	NA	13.0234	9.87496e-39	1.0902e-35	NA	GTEx_Pos	0.0199364	0.0764519	0.0500081	0.018653	0.287262	0.363233	-0.075971	0.353323	0.317834	0.0354894	Complete
anthropometric & lifestyle	height	B_HEIGHT	BTN3A3	6	26440472	26453415	protein_coding	-4.19896	2.68434e-05	0.0437547	NA	NA	NA	NA	Korean_Neg	0.1634	NA	NA	0.293905	0.133204	0.190424	-0.0572209	NA	NA	NA	No
anthropometric & lifestyle	height	B_HEIGHT	FADS2	11	61816256	61867354	protein_coding	-5.21575	1.8353e-07	0.000299153	0.2302	0.817937	1	-5.44595	Korean_Neg	0.0826164	0.606665	0.0718299	0.086314	0.473707	0.352886	0.120821	0.532941	0.390588	0.142353	Complete
anthropometric & lifestyle	height	B_HEIGHT	GNAS	20	58840845	58911192	protein_coding	-6.40306	1.53144e-10	2.49625e-07	NA	NA	NA	NA	Korean_Neg	0.0638279	0.0272872	0.049876	0.109986	0.198311	0.148256	0.0500554	0.548102	0.53832	0.0097821	Complete
anthropometric & lifestyle	height	B_HEIGHT	HDLBP	2	241227264	241317061	protein_coding	-5.93997	2.86255e-09	4.66596e-06	-2.62724	0.00860983	1	-3.31274	Korean_Neg	0.11568	0.0259473	0.117119	0.182652	0.349599	0.286186	0.0634126	0.310453	0.301486	0.00896751	Complete
anthropometric & lifestyle	height	B_HEIGHT	HLA-A	6	29941260	29945884	protein_coding	-4.35862	1.31051e-05	0.0213613	2.98697	0.00281841	1	-7.34559	Korean_Neg	0.655795	0.244848	0.159111	0.750068	0.247343	0.337991	-0.0906487	0.114808	0.161202	-0.0463932	No
anthropometric & lifestyle	height	B_HEIGHT	RPL10A	6	35468408	35470785	protein_coding	-4.69992	2.60706e-06	0.00424951	0.460572	0.645107	1	-5.16049	Korean_Neg	0.0887492	0.142833	0.0518499	0.088083	0.185541	0.219604	-0.0340632	0.310881	0.291585	0.0192965	No
anthropometric & lifestyle	height	B_HEIGHT	SPON1	11	13962689	14267884	protein_coding	-4.92717	8.35989e-07	0.00136266	NA	NA	NA	NA	Korean_Neg	0.0867172	NA	NA	0.117773	0.344601	0.366205	-0.0216036	NA	NA	NA	Complete
anthropometric & lifestyle	height	B_HEIGHT	CROCC	1	16921950	16972979	protein_coding	-6.61673	3.69568e-11	6.02396e-08	-7.83307	4.81952e-15	5.32075e-12	1.21635	Korean_Neg_GTEx_Neg	0.164154	0.236323	0.102253	0.172182	0.237671	0.333127	-0.0954556	0.391933	0.325508	0.0664251	Complete
anthropometric & lifestyle	height	B_HEIGHT	FTSJ3	17	63819433	63830012	protein_coding	-5.66818	1.44825e-08	2.36064e-05	-4.86161	1.16654e-06	0.00128786	-0.806562	Korean_Neg_GTEx_Neg	0.106507	0.2188	0.125693	0.06394	0.413606	0.387214	0.0263919	0.319301	0.329785	-0.010484	Complete
anthropometric & lifestyle	height	B_HEIGHT	RPS26	12	56041853	56044675	protein_coding	-8.24885	1.62348e-16	2.64627e-13	-8.18448	2.77504e-16	3.06365e-13	-0.0643734	Korean_Neg_GTEx_Neg	0.718673	0.666807	0.709689	0.789871	0.209168	0.249575	-0.0404073	0.287335	0.323812	-0.0364774	Strong
anthropometric & lifestyle	height	B_HEIGHT	HLA-F	6	29722775	29738528	protein_coding	-4.74661	2.07216e-06	0.00337762	4.3205	1.55865e-05	0.0172075	-9.06711	Korean_Neg_GTEx_Pos	0.215472	0.324348	0.0900954	0.373293	0.209187	0.228023	-0.0188366	0.224538	0.28573	-0.0611918	No
anthropometric & lifestyle	height	B_HEIGHT	CFAP44	3	113287460	113441610	protein_coding	4.26912	1.96476e-05	0.0320255	-3.27487	0.00105755	1	7.54399	Korean_Pos	0.137939	0.0238774	0.0621809	0.127132	0.279147	0.433504	-0.154357	0.239802	0.235322	0.00448066	No
anthropometric & lifestyle	height	B_HEIGHT	CHMP1A	16	89644431	89657801	protein_coding	5.02746	4.98102e-07	0.000811906	NA	NA	NA	NA	Korean_Pos	0.194963	NA	NA	0.218071	0.350333	0.556342	-0.206009	NA	NA	NA	No
anthropometric & lifestyle	height	B_HEIGHT	CUL7	6	43037617	43053945	protein_coding	4.30697	1.65708e-05	0.0270104	3.96317	7.40269e-05	0.0817257	0.343799	Korean_Pos	0.217724	0.209004	0.103564	0.173184	0.254994	0.131215	0.123779	0.343944	0.355445	-0.0115012	Strong
anthropometric & lifestyle	height	B_HEIGHT	DYSF	2	71453722	71686768	protein_coding	7.60837	2.80616e-14	4.57403e-11	NA	NA	NA	NA	Korean_Pos	0.128221	-0.00375534	0	0.109152	0.252745	0.272202	-0.019457	0.529581	0.613629	-0.0840479	Complete
anthropometric & lifestyle	height	B_HEIGHT	MICA	6	31399784	31415315	protein_coding	5.53481	3.12553e-08	5.09461e-05	-0.824541	0.409635	1	6.35935	Korean_Pos	0.373262	0.352137	0.238996	0.392822	0.253819	0.233217	0.0206025	0.322138	0.288106	0.0340321	Complete
anthropometric & lifestyle	height	B_HEIGHT	POLR2J2	7	102665368	102671629	protein_coding	4.79004	1.67046e-06	0.00272285	NA	NA	NA	NA	Korean_Pos	0.21352	0.215293	0.0133156	0.291814	0.195495	0.120366	0.0751293	0.359624	0.315924	0.0436996	No
anthropometric & lifestyle	height	B_HEIGHT	PTK7	6	43076268	43161719	protein_coding	4.76325	1.90834e-06	0.0031106	NA	NA	NA	NA	Korean_Pos	0.0600968	0.0208384	0.0247646	0.085819	0.264542	0.0651468	0.199395	0.411391	0.288141	0.123251	No
anthropometric & lifestyle	height	B_HEIGHT	RYK	3	134065303	134250744	protein_coding	5.54589	2.9339e-08	4.78225e-05	NA	NA	NA	NA	Korean_Pos	0.0684566	NA	NA	0.071291	0.2437	0.172905	0.0707946	NA	NA	NA	Complete
anthropometric & lifestyle	height	B_HEIGHT	RP11-817O13.8	15	75368199	75369378	lincRNA	5.25825	1.4581e-07	0.00023767	4.27856	1.88324e-05	0.020791	0.979686	Korean_Pos_GTEx_Pos	0.0794429	0.155627	0.0638891	0.088346	0.337265	0.251518	0.0857469	0.513892	0.275392	0.238501	No
anthropometric & lifestyle	height	B_HEIGHT	CDK10	16	89680737	89696342	protein_coding	5.84348	5.13198e-09	8.36513e-06	6.16964	6.87767e-10	7.59295e-07	-0.326154	Korean_Pos_GTEx_Pos	0.261772	0.460645	0.224743	0.283213	0.341729	0.32104	0.0206891	0.431173	0.404519	0.0266545	Complete
anthropometric & lifestyle	height	B_HEIGHT	MAN2C1	15	75358201	75368154	protein_coding	5.42454	5.82721e-08	9.49835e-05	4.66986	3.01893e-06	0.00333289	0.75468	Korean_Pos_GTEx_Pos	0.535184	0.636727	0.460246	0.432303	0.36457	0.286768	0.0778017	0.276149	0.217875	0.0582744	No
anthropometric & lifestyle	height	B_HEIGHT	NT5DC2	3	52524496	52535054	protein_coding	4.82805	1.38136e-06	0.00225162	4.5578	5.17687e-06	0.00571527	0.270243	Korean_Pos_GTEx_Pos	0.0761879	0.160246	0.0858324	0.066309	0.382598	0.364076	0.0185221	0.378038	0.358915	0.0191231	No
anthropometric & lifestyle	height	B_HEIGHT	UBE2Z	17	48908369	48929056	protein_coding	5.97735	2.27762e-09	3.71252e-06	6.16343	7.15258e-10	7.89645e-07	-0.186083	Korean_Pos_GTEx_Pos	0.0977658	0.23068	0.121132	0.091125	0.216415	0.239919	-0.023504	0.165532	0.179028	-0.0134965	Complete
anthropometric & lifestyle	height	B_HEIGHT	VPS13C	15	61852389	62060473	protein_coding	4.18471	2.85832e-05	0.0465906	4.18172	2.89628e-05	0.0319749	0.00299858	Korean_Pos_GTEx_Pos	0.0750745	0.116556	0.0970068	0.112124	0.44736	0.415126	0.0322332	0.277292	0.259854	0.0174381	No
anthropometric & lifestyle	hip circumference	B_HIP	HLA-DQB2	6	32756098	32763534	protein_coding	-0.0585739	0.953292	1	-4.51721	6.27597e-06	0.00692868	4.45864	GTEx_Neg	0.320287	0.638368	0.0972869	0.306599	0.261614	0.211164	0.0504501	0.358003	0.358332	-0.000329318	No
anthropometric & lifestyle	hip circumference	B_HIP	PLXND1	3	129555175	129606818	protein_coding	-4.10002	4.13576e-05	0.0674128	-4.09651	4.19892e-05	0.0463561	-0.00351005	GTEx_Neg	0.145626	0.0233124	0.100089	0.170822	0.285864	0.26111	0.0247548	0.277528	0.312615	-0.035087	Complete
anthropometric & lifestyle	hip circumference	B_HIP	HLA-DQA1	6	32628179	32643652	protein_coding	3.52719	0.000420255	0.685015	4.4453	8.78998e-06	0.00970414	-0.918112	GTEx_Pos	0.542499	0.307414	0.459149	0.422773	0.208591	0.222653	-0.0140622	0.289473	0.287051	0.002422	No
anthropometric & lifestyle	hip circumference	B_HIP	ZBTB38	3	141324213	141449792	protein_coding	NA	NA	NA	7.31912	2.52228e-13	2.78459e-10	NA	GTEx_Pos	0.0199364	0.0764519	0.0500081	0.018653	0.287262	0.363233	-0.075971	0.353323	0.317834	0.0354894	Complete
anthropometric & lifestyle	hip circumference	B_HIP	INO80E	16	29995294	30005508	protein_coding	-4.77265	1.82179e-06	0.00296951	-4.57487	4.77327e-06	0.00526969	-0.197783	Korean_Neg_GTEx_Neg	0.0872916	0.070143	0.112234	0.083204	0.333329	0.388218	-0.0548888	0.21179	0.26533	-0.0535399	Strong
anthropometric & lifestyle	hip circumference	B_HIP	ITIH4	3	52812975	52830739	protein_coding	4.4398	9.01771e-06	0.0146989	3.63397	0.000279284	0.30833	0.805826	Korean_Pos	0.38098	0.413051	0.361292	0.320714	0.312615	0.247107	0.0655087	0.592988	0.355826	0.237162	Strong
anthropometric & lifestyle	hip circumference	B_HIP	NT5C2	10	103090611	103193306	protein_coding	4.23526	2.28573e-05	0.0372575	4.12151	3.7682e-05	0.0416009	0.113748	Korean_Pos_GTEx_Pos	0.0882994	0.0410606	0.100669	0.083519	0.299391	0.110693	0.188698	0.306878	0.328479	-0.0216015	Strong
anthropometric & lifestyle	hip circumference	B_HIP	YPEL3	16	30092314	30096244	protein_coding	5.00308	5.65559e-07	0.000921862	5.06843	4.0211e-07	0.000443929	-0.0653525	Korean_Pos_GTEx_Pos	0.0758802	0.0959578	0.0812412	0.075164	0.212418	0.147696	0.0647216	0.399172	0.524699	-0.125527	No
anthropometric & lifestyle	waist circumference	B_WAIST	HECTD4	12	112160188	112382439	protein_coding	-5.53624	3.10004e-08	5.05307e-05	NA	NA	NA	NA	Korean_Neg	0.0898364	NA	NA	0.066577	0.362094	0.979479	-0.617386	NA	NA	NA	Complete
anthropometric & lifestyle	waist circumference	B_WAIST	MED24	17	40019097	40061215	protein_coding	-4.47618	7.60978e-06	0.0124039	1.99726	0.0458006	1	-6.47343	Korean_Neg	0.0571728	0.10708	0.051291	0.072134	0.25953	0.255911	0.00361839	0.203082	0.283981	-0.0808994	Weak
anthropometric & lifestyle	waist circumference	B_WAIST	INO80E	16	29995294	30005508	protein_coding	-5.24244	1.58869e-07	0.000258957	-4.86877	1.12508e-06	0.00124209	-0.373669	Korean_Neg_GTEx_Neg	0.0872916	0.070143	0.112234	0.083204	0.333329	0.388218	-0.0548888	0.21179	0.26533	-0.0535399	Strong
anthropometric & lifestyle	waist circumference	B_WAIST	DMPK	19	45769717	45782552	protein_coding	4.24143	2.22352e-05	0.0362434	0.666259	0.505248	1	3.57517	Korean_Pos	0.0555556	0.0584776	0.078039	0.073737	0.26493	0.365118	-0.100188	0.506167	0.341107	0.16506	Weak
anthropometric & lifestyle	waist circumference	B_WAIST	ITIH4	3	52812975	52830739	protein_coding	4.82287	1.41773e-06	0.00231089	4.1753	2.97908e-05	0.0328891	0.647563	Korean_Pos_GTEx_Pos	0.38098	0.413051	0.361292	0.320714	0.312615	0.247107	0.0655087	0.592988	0.355826	0.237162	Strong
anthropometric & lifestyle	waist circumference	B_WAIST	RPH3A	12	112570380	112898881	protein_coding	4.77608	1.79069e-06	0.00291882	4.64728	3.36887e-06	0.00371924	0.128799	Korean_Pos_GTEx_Pos	0.124991	0.530523	0.148492	0.1957	0.348022	0.474263	-0.12624	0.350782	0.364585	-0.0138033	Strong
anthropometric & lifestyle	waist circumference	B_WAIST	TMEM110	3	52836219	52897596	protein_coding	4.22989	2.34068e-05	0.0381531	4.3878	1.14648e-05	0.0126572	-0.157915	Korean_Pos_GTEx_Pos	0.122566	0.112255	0.10708	0.117992	0.282463	0.238741	0.043722	0.294216	0.382182	-0.0879668	No
anthropometric & lifestyle	waist circumference	B_WAIST	YPEL3	16	30092314	30096244	protein_coding	5.79424	6.88887e-09	1.12289e-05	5.8471	5.02185e-09	5.54412e-06	-0.0528522	Korean_Pos_GTEx_Pos	0.0758802	0.0959578	0.0812412	0.075164	0.212418	0.147696	0.0647216	0.399172	0.524699	-0.125527	Weak
blood pressure	average diastolic blood pressure	B_DBP	HECTD4	12	112160188	112382439	protein_coding	-4.72169	2.34298e-06	0.00381906	NA	NA	NA	NA	Korean_Neg	0.0898364	NA	NA	0.066577	0.362094	0.979479	-0.617386	NA	NA	NA	Complete
blood pressure	average diastolic blood pressure	B_DBP	NT5C2	10	103090611	103193306	protein_coding	-7.69799	1.39811e-14	2.27893e-11	-6.89985	5.24456e-12	5.78999e-09	-0.79814	Korean_Neg_GTEx_Neg	0.0882994	0.0410606	0.100669	0.083519	0.299391	0.110693	0.188698	0.306878	0.328479	-0.0216015	Strong
blood pressure	average diastolic blood pressure	B_DBP	RPH3A	12	112570380	112898881	protein_coding	5.20355	1.96006e-07	0.000319489	4.9109	9.0839e-07	0.00100286	0.292646	Korean_Pos_GTEx_Pos	0.124991	0.530523	0.148492	0.1957	0.348022	0.474263	-0.12624	0.350782	0.364585	-0.0138033	No
blood pressure	average systolic blood pressure	B_SBP	NT5C2	10	103090611	103193306	protein_coding	-9.57986	9.98485e-22	1.62753e-18	-9.11115	8.33469e-20	9.20149e-17	-0.46871	Korean_Neg_GTEx_Neg	0.0882994	0.0410606	0.100669	0.083519	0.299391	0.110693	0.188698	0.306878	0.328479	-0.0216015	Complete
blood pressure	average systolic blood pressure	B_SBP	LRWD1	7	102464929	102473117	protein_coding	4.46283	8.09952e-06	0.0132022	4.41672	1.00342e-05	0.0110778	0.0461099	Korean_Pos_GTEx_Pos	0.10981	0.351786	0.136547	0.156371	0.318926	0.527877	-0.208951	0.364093	0.360174	0.00391911	No
blood pressure	average systolic blood pressure	B_SBP	RPH3A	12	112570380	112898881	protein_coding	4.58252	4.60108e-06	0.00749977	4.26234	2.02529e-05	0.0223592	0.320177	Korean_Pos_GTEx_Pos	0.124991	0.530523	0.148492	0.1957	0.348022	0.474263	-0.12624	0.350782	0.364585	-0.0138033	No
blood pressure	mean arterial pressure	B_MAP	HECTD4	12	112160188	112382439	protein_coding	-4.76198	1.92039e-06	0.00313024	NA	NA	NA	NA	Korean_Neg	0.0898364	NA	NA	0.066577	0.362094	0.979479	-0.617386	NA	NA	NA	Complete
blood pressure	mean arterial pressure	B_MAP	NT5C2	10	103090611	103193306	protein_coding	-9.10282	8.99914e-20	1.46686e-16	-8.39939	4.56111e-17	5.03547e-14	-0.703429	Korean_Neg_GTEx_Neg	0.0882994	0.0410606	0.100669	0.083519	0.299391	0.110693	0.188698	0.306878	0.328479	-0.0216015	Complete
blood pressure	mean arterial pressure	B_MAP	LRWD1	7	102464929	102473117	protein_coding	4.23696	2.26817e-05	0.0369713	4.18149	2.89913e-05	0.0320063	0.055472	Korean_Pos_GTEx_Pos	0.10981	0.351786	0.136547	0.156371	0.318926	0.527877	-0.208951	0.364093	0.360174	0.00391911	No
blood pressure	mean arterial pressure	B_MAP	RPH3A	12	112570380	112898881	protein_coding	5.28502	1.26022e-07	0.000205416	4.95914	7.0951e-07	0.000783299	0.325878	Korean_Pos_GTEx_Pos	0.124991	0.530523	0.148492	0.1957	0.348022	0.474263	-0.12624	0.350782	0.364585	-0.0138033	No
cancer	thyroid cancer	B_THYCA	NRG1	8	31639386	32767959	protein_coding	-5.45578	8.2779e-08	0.00013493	-4.12565	4.93097e-05	0.0544379	-1.33013	Korean_Neg	0.245515	0.212656	0.199217	0.242743	0.195466	0.423395	-0.227929	0.39001	0.329956	0.0600536	Complete
cardiovascular diseases	hypertension	B_HTN	MAPKAP1	9	125437393	125707234	protein_coding	-5.98483	1.73166e-09	2.8226e-06	NA	NA	NA	NA	Korean_Neg	0.052656	NA	NA	0.048152	0.136801	0.00736078	0.12944	NA	NA	NA	Complete
cardiovascular diseases	hypertension	B_HTN	SIDT2	11	117178733	117197445	protein_coding	-4.41811	9.66562e-06	0.015755	-1.98125	0.0473994	1	-2.43686	Korean_Neg	0.587247	0.262303	0.564298	0.43515	0.296116	0.519593	-0.223477	0.410759	0.379246	0.0315126	Complete
cardiovascular diseases	hypertension	B_HTN	C2orf74	2	61145068	61164829	protein_coding	-4.19247	2.67396e-05	0.0435855	-4.1939	2.65389e-05	0.0292989	0.00142686	Korean_Neg_GTEx_Neg	0.128611	0.224342	0.149103	0.098903	0.353324	0.426225	-0.0729002	0.446416	0.477443	-0.0310268	Weak
cardiovascular diseases	hypertension	B_HTN	NT5C2	10	103090611	103193306	protein_coding	-8.59858	0	0	-8.37941	0	0	-0.21917	Korean_Neg_GTEx_Neg	0.0882994	0.0410606	0.100669	0.083519	0.299391	0.110693	0.188698	0.306878	0.328479	-0.0216015	Complete
cardiovascular diseases	hypertension	B_HTN	BTN2A1	6	26457904	26476621	protein_coding	4.28205	1.94261e-05	0.0316645	1.70575	0.0891156	1	2.5763	Korean_Pos	0.0897159	0.353811	0.093508	0.105878	0.296021	0.223825	0.0721952	0.196914	0.197852	-0.000937717	Complete
cardiovascular diseases	hypertension	B_HTN	RPH3A	12	112570380	112898881	protein_coding	4.58263	4.44021e-06	0.00723754	3.87334	0.000105236	0.116181	0.709288	Korean_Pos	0.124991	0.530523	0.148492	0.1957	0.348022	0.474263	-0.12624	0.350782	0.364585	-0.0138033	Complete
cardiovascular diseases	hypertension	B_HTN	SUSD2	22	24181259	24189110	protein_coding	4.59673	4.30905e-06	0.00702376	NA	NA	NA	NA	Korean_Pos	0.069804	0.0919847	0.022335	0.082016	0.224081	0.164403	0.0596783	0.654102	0.507984	0.146118	Complete
cardiovascular diseases	hypertension	B_HTN	EML6	2	54723665	54972025	protein_coding	6.22309	5.97812e-10	9.74434e-07	5.90581	4.3602e-09	4.81366e-06	0.317281	Korean_Pos_GTEx_Pos	0.0536465	0.0229647	0.055574	0.126149	0.206979	0.293721	-0.0867421	0.448746	0.390348	0.0583982	Complete
digestive diseases	chronic gastritis	B_GASTRO	APOBEC3A	22	38952741	38963183	protein_coding	-1.43395	0.151699	1	-4.21316	2.25271e-05	0.02487	2.77921	GTEx_Neg	0.260982	0.170796	0.21208	0.355575	0.280331	0.28591	-0.00557968	0.349881	0.483182	-0.133301	Weak
digestive diseases	chronic gastritis	B_GASTRO	PDK2	17	50094737	50110039	protein_coding	4.72721	2.37318e-06	0.00386829	NA	NA	NA	NA	Korean_Pos	0.0672541	-0.00211275	0.00988	0.125005	0.300421	0.320382	-0.0199609	0.319073	0.348394	-0.0293212	No
endocrine diseases	thyroid disease	B_THY	C6orf48	6	31834608	31839766	protein_coding	-4.50052	1.06181e-05	0.0173075	NA	NA	NA	NA	Korean_Neg	0.14136	0.0885843	0.0245969	0.209661	0.236833	0.199017	0.0378158	0.314487	0.366763	-0.0522767	Complete
endocrine diseases	thyroid disease	B_THY	GPSM3	6	32190766	32194829	protein_coding	-4.24658	1.10308e-05	0.0179802	NA	NA	NA	NA	Korean_Neg	0.110592	NA	NA	0.126495	0.185605	0.167619	0.0179859	NA	NA	NA	No
hematological	blood hematocrit	B_HCT	TMEM110	3	52836219	52897596	protein_coding	-4.02357	5.73909e-05	0.0935471	-4.84469	1.27119e-06	0.00140339	0.821117	GTEx_Neg	0.122566	0.112255	0.10708	0.117992	0.282463	0.238741	0.043722	0.294216	0.382182	-0.0879668	No
hematological	blood hematocrit	B_HCT	SURF6	9	133328774	133336398	protein_coding	NA	NA	NA	4.96088	7.0361e-07	0.000776786	NA	GTEx_Pos	0.0413864	0.377049	0.0559949	0.069453	0.284393	0.388859	-0.104466	0.431293	0.335452	0.0958412	No
hematological	blood hematocrit	B_HCT	DDX39B	6	31530233	31542448	protein_coding	-6.14732	7.92841e-10	1.29233e-06	NA	NA	NA	NA	Korean_Neg	0.0542163	0.257835	0.00105943	0.09249	0.158059	0.198696	-0.040637	0.281804	0.349656	-0.0678521	Weak
hematological	blood hematocrit	B_HCT	HSD17B11	4	87336610	87391386	protein_coding	-5.1182	3.09383e-07	0.000504294	-1.85728	0.0632757	1	-3.26092	Korean_Neg	0.0797655	0.0838931	0.0632462	0.09404	0.311958	0.277318	0.0346395	0.49126	0.332353	0.158907	Weak
hematological	blood hematocrit	B_HCT	ITIH4	3	52812975	52830739	protein_coding	-4.46527	8.01107e-06	0.0130581	-4.01338	5.99258e-05	0.0661581	-0.451886	Korean_Neg	0.38098	0.413051	0.361292	0.320714	0.312615	0.247107	0.0655087	0.592988	0.355826	0.237162	Strong
hematological	blood hematocrit	B_HCT	C6orf48	6	31834608	31839766	protein_coding	6.94158	3.91568e-12	6.38256e-09	NA	NA	NA	NA	Korean_Pos	0.14136	0.0885843	0.0245969	0.209661	0.236833	0.199017	0.0378158	0.314487	0.366763	-0.0522767	Weak
hematological	blood hematocrit	B_HCT	CNTROB	17	7932124	7949578	protein_coding	4.77022	1.8445e-06	0.00300653	0.281659	0.778206	1	4.48856	Korean_Pos	0.0572701	0.0111247	0.0662753	0.082106	0.231958	0.320766	-0.0888085	0.032347	0.362752	-0.330405	No
hematological	blood hematocrit	B_HCT	FADS2	11	61816256	61867354	protein_coding	4.60973	4.04002e-06	0.00658523	3.25126	0.00114958	1	1.35847	Korean_Pos	0.0826164	0.606665	0.0718299	0.086314	0.473707	0.352886	0.120821	0.532941	0.390588	0.142353	Complete
hematological	blood hematocrit	B_HCT	HECTD4	12	112160188	112382439	protein_coding	4.23899	2.24851e-05	0.0366507	NA	NA	NA	NA	Korean_Pos	0.0898364	NA	NA	0.066577	0.362094	0.979479	-0.617386	NA	NA	NA	Strong
hematological	blood hematocrit	B_HCT	INTS1	7	1470277	1504367	protein_coding	4.83152	1.35819e-06	0.00221384	NA	NA	NA	NA	Korean_Pos	0.239213	0.362262	0.0306026	0.482828	0.277929	0.461754	-0.183825	0.290742	0.279673	0.0110684	No
hematological	blood hematocrit	B_HCT	KLC1	14	103561896	103714104	protein_coding	4.17137	3.03192e-05	0.0494202	3.53584	0.000406777	0.449081	0.635526	Korean_Pos	0.0634867	0.201661	0.0684722	0.101868	0.308659	0.370556	-0.061897	0.482518	0.513557	-0.0310397	Weak
hematological	blood hematocrit	B_HCT	ABO	9	133250401	133275214	protein_coding	8.78574	1.59235e-18	2.59553e-15	6.71347	1.91694e-11	2.11631e-08	2.07227	Korean_Pos_GTEx_Pos	0.446552	0.52755	0.424217	0.449283	0.248764	0.1771	0.071664	0.401208	0.253858	0.14735	Complete
hematological	blood hematocrit	B_HCT	MED22	9	133338323	133348131	protein_coding	5.45773	4.84104e-08	7.89089e-05	5.26626	1.39699e-07	0.000154228	0.191477	Korean_Pos_GTEx_Pos	0.0509047	0.292927	0.0807514	0.095659	0.335778	0.481845	-0.146067	0.308455	0.380806	-0.072351	No
hematological	blood hematocrit	B_HCT	NT5DC2	3	52524496	52535054	protein_coding	4.47873	7.52241e-06	0.0122615	4.83913	1.30724e-06	0.00144319	-0.360402	Korean_Pos_GTEx_Pos	0.0761879	0.160246	0.0858324	0.066309	0.382598	0.364076	0.0185221	0.378038	0.358915	0.0191231	No
hematological	blood hemoglobin	B_HB	SLC20A2	8	42416475	42541597	protein_coding	NA	NA	NA	-4.41244	1.02347e-05	0.0112992	NA	GTEx_Neg	0.0398597	0.0302683	0.0635531	0.088511	0.277161	0.323392	-0.046231	0.590129	0.551236	0.038893	Strong
hematological	blood hemoglobin	B_HB	TMEM110	3	52836219	52897596	protein_coding	-4.02562	5.68803e-05	0.0927149	-4.86579	1.14223e-06	0.00126103	0.840174	GTEx_Neg	0.122566	0.112255	0.10708	0.117992	0.282463	0.238741	0.043722	0.294216	0.382182	-0.0879668	No
hematological	blood hemoglobin	B_HB	YPEL3	16	30092314	30096244	protein_coding	-4.15124	3.31037e-05	0.053959	-4.34081	1.42136e-05	0.0156918	0.189577	GTEx_Neg	0.0758802	0.0959578	0.0812412	0.075164	0.212418	0.147696	0.0647216	0.399172	0.524699	-0.125527	Weak
hematological	blood hemoglobin	B_HB	NT5DC2	3	52524496	52535054	protein_coding	4.13735	3.51712e-05	0.0573291	4.52361	6.08839e-06	0.00672158	-0.386261	GTEx_Pos	0.0761879	0.160246	0.0858324	0.066309	0.382598	0.364076	0.0185221	0.378038	0.358915	0.0191231	Weak
hematological	blood hemoglobin	B_HB	SURF6	9	133328774	133336398	protein_coding	NA	NA	NA	6.10805	1.01334e-09	1.11872e-06	NA	GTEx_Pos	0.0413864	0.377049	0.0559949	0.069453	0.284393	0.388859	-0.104466	0.431293	0.335452	0.0958412	No
hematological	blood hemoglobin	B_HB	DDX39B	6	31530233	31542448	protein_coding	-7.04335	1.89227e-12	3.0844e-09	NA	NA	NA	NA	Korean_Neg	0.0542163	0.257835	0.00105943	0.09249	0.158059	0.198696	-0.040637	0.281804	0.349656	-0.0678521	Weak
hematological	blood hemoglobin	B_HB	HSD17B11	4	87336610	87391386	protein_coding	-5.23517	1.65257e-07	0.000269369	-1.33282	0.182593	1	-3.90235	Korean_Neg	0.0797655	0.0838931	0.0632462	0.09404	0.311958	0.277318	0.0346395	0.49126	0.332353	0.158907	Weak
hematological	blood hemoglobin	B_HB	ITIH4	3	52812975	52830739	protein_coding	-4.36039	1.29996e-05	0.0211893	-4.04357	5.2695e-05	0.0581753	-0.316827	Korean_Neg	0.38098	0.413051	0.361292	0.320714	0.312615	0.247107	0.0655087	0.592988	0.355826	0.237162	Weak
hematological	blood hemoglobin	B_HB	TMEM171	5	73120292	73131817	protein_coding	-6.02654	1.68256e-09	2.74257e-06	NA	NA	NA	NA	Korean_Neg	0.0587838	-0.00288038	0.0242284	0.081513	0.286638	0.11689	0.169748	0.405131	0.370316	0.0348153	No
hematological	blood hemoglobin	B_HB	C6orf48	6	31834608	31839766	protein_coding	6.86124	6.87767e-12	1.12106e-08	NA	NA	NA	NA	Korean_Pos	0.14136	0.0885843	0.0245969	0.209661	0.236833	0.199017	0.0378158	0.314487	0.366763	-0.0522767	Weak
hematological	blood hemoglobin	B_HB	FADS2	11	61816256	61867354	protein_coding	6.66678	2.63228e-11	4.29061e-08	3.39813	0.000678817	0.749414	3.26864	Korean_Pos	0.0826164	0.606665	0.0718299	0.086314	0.473707	0.352886	0.120821	0.532941	0.390588	0.142353	Weak
hematological	blood hemoglobin	B_HB	HLA-B	6	31269491	31356442	protein_coding	4.44023	8.99847e-06	0.0146675	1.16195	0.245261	1	3.27829	Korean_Pos	0.663548	0.263087	0.0678217	0.752257	0.219457	0.229957	-0.0104993	0.302048	0.306745	-0.00469711	Complete
hematological	blood hemoglobin	B_HB	INTS1	7	1470277	1504367	protein_coding	5.56185	2.67809e-08	4.36529e-05	NA	NA	NA	NA	Korean_Pos	0.239213	0.362262	0.0306026	0.482828	0.277929	0.461754	-0.183825	0.290742	0.279673	0.0110684	No
hematological	blood hemoglobin	B_HB	MYRF	11	61752649	61788518	protein_coding	4.19962	2.67655e-05	0.0436278	NA	NA	NA	NA	Korean_Pos	0.0554098	0.133607	0.0329705	0.065741	0.430281	0.317187	0.113094	0.184495	0.327209	-0.142714	Complete
hematological	blood hemoglobin	B_HB	ST5	11	8693351	8910951	protein_coding	4.23177	2.3213e-05	0.0378372	NA	NA	NA	NA	Korean_Pos	0.167409	0.0330518	3.31448e-07	0.268355	0.243205	0.258897	-0.0156922	0.404764	0.356398	0.0483655	Weak
hematological	blood hemoglobin	B_HB	ABO	9	133250401	133275214	protein_coding	14.0245	1.25113e-44	2.03934e-41	11.4272	3.2329e-30	3.56912e-27	2.59732	Korean_Pos_GTEx_Pos	0.446552	0.52755	0.424217	0.449283	0.248764	0.1771	0.071664	0.401208	0.253858	0.14735	Complete
hematological	blood hemoglobin	B_HB	KLC1	14	103561896	103714104	protein_coding	4.90099	9.55457e-07	0.00155739	4.17349	3.0029e-05	0.033152	0.727498	Korean_Pos_GTEx_Pos	0.0634867	0.201661	0.0684722	0.101868	0.308659	0.370556	-0.061897	0.482518	0.513557	-0.0310397	Weak
hematological	blood hemoglobin	B_HB	MED22	9	133338323	133348131	protein_coding	6.74974	1.4915e-11	2.43114e-08	6.53329	6.47376e-11	7.14703e-08	0.216449	Korean_Pos_GTEx_Pos	0.0509047	0.292927	0.0807514	0.095659	0.335778	0.481845	-0.146067	0.308455	0.380806	-0.072351	No
hematological	blood mean corpuscular hemoglobin (MCH)	B_MCH	PROCA1	17	28703197	28711854	protein_coding	NA	NA	NA	-4.92311	8.54009e-07	0.000942826	NA	GTEx_Neg	0.0395887	0.145588	0.0627501	0.055717	0.136324	0.0820213	0.0543027	0.361343	0.382305	-0.0209616	No
hematological	blood mean corpuscular hemoglobin (MCH)	B_MCH	HBZ	16	152687	154503	protein_coding	-1.00617	0.31434	1	13.0565	6.57295e-39	7.25653e-36	-14.0627	GTEx_Pos	0.159056	0.438672	0.145451	0.191264	0.263691	0.211905	0.0517859	0.428469	0.358134	0.0703345	Complete
hematological	blood mean corpuscular hemoglobin (MCH)	B_MCH	MUC20	3	195720882	195741123	protein_coding	2.13317	0.0329146	1	8.91386	5.05973e-19	5.58594e-16	-6.78069	GTEx_Pos	0.175444	0.48423	0.0847283	0.223625	0.239882	0.377354	-0.137472	0.368347	0.293348	0.0749992	No
hematological	blood mean corpuscular hemoglobin (MCH)	B_MCH	ODF3B	22	50530409	50532580	protein_coding	NA	NA	NA	8.46171	2.69176e-17	2.9717e-14	NA	GTEx_Pos	0.0419985	0.226351	0.0719976	0.073398	0.266486	0.241606	0.0248796	0.406815	0.352363	0.0544516	Strong
hematological	blood mean corpuscular hemoglobin (MCH)	B_MCH	ARL17A	17	46516702	46579682	protein_coding	-4.31341	1.61006e-05	0.0262441	-3.41168	0.000646045	0.713234	-0.901725	Korean_Neg	0.175003	0.3878	0.133355	0.159034	0.377335	0.812192	-0.434858	0.245505	0.179373	0.066132	Strong
hematological	blood mean corpuscular hemoglobin (MCH)	B_MCH	ARL17B	17	46274784	46361797	protein_coding	-4.68146	2.85441e-06	0.00465269	-3.74044	0.000183863	0.202985	-0.941021	Korean_Neg	0.137119	0.266338	0.0771091	0.154213	0.340118	0.759604	-0.419486	0.256575	0.202082	0.0544932	Strong
hematological	blood mean corpuscular hemoglobin (MCH)	B_MCH	GLMP	1	156290089	156295689	protein_coding	-4.33612	1.45253e-05	0.0236762	-3.8097	0.000139273	0.153757	-0.526419	Korean_Neg	0.0709662	0.609424	0.0814315	0.073683	0.306076	0.324408	-0.0183317	0.312294	0.30987	0.00242467	Weak
hematological	blood mean corpuscular hemoglobin (MCH)	B_MCH	GSTA1	6	52791664	52803910	protein_coding	-4.21413	2.51101e-05	0.0409295	NA	NA	NA	NA	Korean_Neg	0.150537	NA	NA	0.154373	0.173585	0.186193	-0.0126072	NA	NA	NA	Weak
hematological	blood mean corpuscular hemoglobin (MCH)	B_MCH	HECTD4	12	112160188	112382439	protein_coding	-5.09412	3.51401e-07	0.000572784	NA	NA	NA	NA	Korean_Neg	0.0898364	NA	NA	0.066577	0.362094	0.979479	-0.617386	NA	NA	NA	Strong
hematological	blood mean corpuscular hemoglobin (MCH)	B_MCH	LRRC37A2	17	46511511	46553449	protein_coding	-5.19729	2.02854e-07	0.000330653	NA	NA	NA	NA	Korean_Neg	0.352064	0.52406	0.0353458	0.335137	0.336565	0.609605	-0.273041	0.236769	0.167621	0.0691478	No
hematological	blood mean corpuscular hemoglobin (MCH)	B_MCH	NPRL3	16	84274	138860	protein_coding	-9.61273	7.31959e-22	1.19309e-18	NA	NA	NA	NA	Korean_Neg	0.0531765	0.0199348	0.0151339	0.112664	0.273407	0.210751	0.062656	0.559285	0.371208	0.188077	Complete
hematological	blood mean corpuscular hemoglobin (MCH)	B_MCH	TMEM171	5	73120292	73131817	protein_coding	-4.35662	1.32297e-05	0.0215644	NA	NA	NA	NA	Korean_Neg	0.0587838	-0.00288038	0.0242284	0.081513	0.286638	0.11689	0.169748	0.405131	0.370316	0.0348153	Weak
hematological	blood mean corpuscular hemoglobin (MCH)	B_MCH	ABO	9	133250401	133275214	protein_coding	-4.8692	1.12329e-06	0.00183096	-4.13817	3.50554e-05	0.0387012	-0.73103	Korean_Neg_GTEx_Neg	0.446552	0.52755	0.424217	0.449283	0.248764	0.1771	0.071664	0.401208	0.253858	0.14735	Complete
hematological	blood mean corpuscular hemoglobin (MCH)	B_MCH	C2orf74	2	61145068	61164829	protein_coding	-4.64292	3.44232e-06	0.00561099	-4.65553	3.23817e-06	0.00357494	0.0126157	Korean_Neg_GTEx_Neg	0.128611	0.224342	0.149103	0.098903	0.353324	0.426225	-0.0729002	0.446416	0.477443	-0.0310268	No
hematological	blood mean corpuscular hemoglobin (MCH)	B_MCH	HEATR3	16	50065941	50106387	protein_coding	-6.3317	2.44141e-10	3.9795e-07	-7.07876	1.47003e-12	1.62292e-09	0.747056	Korean_Neg_GTEx_Neg	0.345128	0.356178	0.349621	0.272885	0.276045	0.264216	0.0118288	0.52499	0.455823	0.0691667	Strong
hematological	blood mean corpuscular hemoglobin (MCH)	B_MCH	INO80E	16	29995294	30005508	protein_coding	-4.34433	1.39924e-05	0.0228077	-4.20734	2.58754e-05	0.0285665	-0.136985	Korean_Neg_GTEx_Neg	0.0872916	0.070143	0.112234	0.083204	0.333329	0.388218	-0.0548888	0.21179	0.26533	-0.0535399	No
hematological	blood mean corpuscular hemoglobin (MCH)	B_MCH	LRRC37A	17	46292733	46337794	protein_coding	-5.05629	4.28725e-07	0.000698821	-6.64868	2.98191e-11	3.29203e-08	1.5924	Korean_Neg_GTEx_Neg	0.270911	0.271155	0.279374	0.2138	0.406231	0.784913	-0.378682	0.310305	0.281001	0.0293037	No
hematological	blood mean corpuscular hemoglobin (MCH)	B_MCH	C1QTNF7	4	15339818	15446166	protein_coding	4.72447	2.31221e-06	0.0037689	NA	NA	NA	NA	Korean_Pos	0.097159	NA	NA	0.091316	0.377803	0.257957	0.119846	NA	NA	NA	No
hematological	blood mean corpuscular hemoglobin (MCH)	B_MCH	CD101	1	117001750	117036476	protein_coding	4.3373	1.44471e-05	0.0235489	NA	NA	NA	NA	Korean_Pos	0.193185	0.290519	0.0484749	0.313543	0.365098	0.514367	-0.149269	0.245515	0.286593	-0.0410781	Weak
hematological	blood mean corpuscular hemoglobin (MCH)	B_MCH	CPT1B	22	50568861	50578455	protein_coding	5.401	6.65162e-08	0.000108421	-0.618574	0.536199	1	6.01957	Korean_Pos	0.607713	0.408823	0.610755	0.556121	0.294114	0.152151	0.141963	0.503273	0.525603	-0.0223307	Weak
hematological	blood mean corpuscular hemoglobin (MCH)	B_MCH	FBXL5	4	15604539	15681661	protein_coding	4.56886	4.91328e-06	0.00800865	NA	NA	NA	NA	Korean_Pos	0.0513961	NA	NA	0.080052	0.466682	0.385341	0.0813408	NA	NA	NA	Strong
hematological	blood mean corpuscular hemoglobin (MCH)	B_MCH	SLC25A21	14	36679716	36875004	protein_coding	4.92411	8.4966e-07	0.00138495	NA	NA	NA	NA	Korean_Pos	0.0570386	0.0259485	0.0177862	0.070248	0.208888	0.143355	0.0655329	0.426631	0.33046	0.096171	Strong
hematological	blood mean corpuscular hemoglobin (MCH)	B_MCH	TREML4	6	41228324	41238882	protein_coding	5.38269	7.3649e-08	0.000120048	-1.16452	0.244219	1	6.5472	Korean_Pos	0.117918	0.676409	0.13591	0.160803	0.235616	0.26694	-0.0313231	0.272916	0.424157	-0.151241	No
hematological	blood mean corpuscular hemoglobin (MCH)	B_MCH	DENND4A	15	65658046	65792293	protein_coding	11.9265	9.36037e-33	1.52574e-29	-8.96396	3.2175e-19	3.55212e-16	20.8904	Korean_Pos_GTEx_Neg	0.0587826	0.0310458	0.0676902	0.063326	0.25221	0.720336	-0.468126	0.299811	0.280451	0.0193599	Complete
hematological	blood mean corpuscular hemoglobin (MCH)	B_MCH	PSTPIP2	18	45983536	46072260	protein_coding	5.91027	3.43347e-09	5.59655e-06	-4.96975	6.72192e-07	0.0007421	10.88	Korean_Pos_GTEx_Neg	0.0603512	0.125053	0.0716383	0.072115	0.233431	0.13869	0.0947409	0.147893	0.135282	0.0126114	Weak
hematological	blood mean corpuscular hemoglobin (MCH)	B_MCH	ITSN1	21	33642400	33899861	protein_coding	5.23677	1.63946e-07	0.000267233	5.01835	5.22612e-07	0.000576964	0.218417	Korean_Pos_GTEx_Pos	0.147203	0.0763645	0.128206	0.146181	0.380018	0.541587	-0.161568	0.753534	0.56464	0.188895	Strong
hematological	blood mean corpuscular hemoglobin (MCH)	B_MCH	LOXL2	8	23297189	23425328	protein_coding	4.26729	1.98155e-05	0.0322992	4.1193	3.80521e-05	0.0420095	0.147993	Korean_Pos_GTEx_Pos	0.0909647	0.0882915	0.0930896	0.117249	0.266976	0.270404	-0.00342793	0.39896	0.462802	-0.0638421	Weak
hematological	blood mean corpuscular hemoglobin (MCH)	B_MCH	TYMP	22	50525752	50530056	protein_coding	8.52629	1.54488e-17	2.51815e-14	8.57144	1.04523e-17	1.15393e-14	-0.045155	Korean_Pos_GTEx_Pos	0.147166	0.333109	0.159919	0.198	0.275599	0.293779	-0.0181797	0.340357	0.303827	0.0365303	Complete
hematological	blood mean corpuscular hemoglobin (MCH)	B_MCH	YPEL3	16	30092314	30096244	protein_coding	4.86509	1.14687e-06	0.0018694	4.98681	6.15511e-07	0.000679524	-0.12172	Korean_Pos_GTEx_Pos	0.0758802	0.0959578	0.0812412	0.075164	0.212418	0.147696	0.0647216	0.399172	0.524699	-0.125527	Weak
hematological	blood mean corpuscular hemoglobin concentration (MCHC)	B_MCHC	SLC20A2	8	42416475	42541597	protein_coding	NA	NA	NA	-12.0946	1.23197e-33	1.3601e-30	NA	GTEx_Neg	0.0398597	0.0302683	0.0635531	0.088511	0.277161	0.323392	-0.046231	0.590129	0.551236	0.038893	Complete
hematological	blood mean corpuscular hemoglobin concentration (MCHC)	B_MCHC	TRIM58	1	247857199	247878205	protein_coding	-1.68413	0.0921609	1	-7.42631	1.13108e-13	1.24871e-10	5.74217	GTEx_Neg	0.0907763	0.0836986	0.0992603	0.15838	0.271627	0.266528	0.00509894	0.36519	0.394275	-0.0290852	Complete
hematological	blood mean corpuscular hemoglobin concentration (MCHC)	B_MCHC	HBZ	16	152687	154503	protein_coding	0.357013	0.721083	1	5.38478	7.27996e-08	8.03707e-05	-5.02776	GTEx_Pos	0.159056	0.438672	0.145451	0.191264	0.263691	0.211905	0.0517859	0.428469	0.358134	0.0703345	Complete
hematological	blood mean corpuscular hemoglobin concentration (MCHC)	B_MCHC	MUC20	3	195720882	195741123	protein_coding	0.379009	0.704683	1	4.31199	1.62045e-05	0.0178897	-3.93298	GTEx_Pos	0.175444	0.48423	0.0847283	0.223625	0.239882	0.377354	-0.137472	0.368347	0.293348	0.0749992	No
hematological	blood mean corpuscular hemoglobin concentration (MCHC)	B_MCHC	AZIN1	8	102826357	102893864	protein_coding	-5.02741	4.98538e-07	0.000812617	NA	NA	NA	NA	Korean_Neg	0.0895679	0.0360687	0.00377367	0.066517	0.155366	0.254653	-0.0992879	0.309548	0.340189	-0.0306412	Strong
hematological	blood mean corpuscular hemoglobin concentration (MCHC)	B_MCHC	POLR2E	19	1086629	1095380	protein_coding	-4.38138	1.18123e-05	0.019254	NA	NA	NA	NA	Korean_Neg	0.130757	0.157537	0.0346312	0.183585	0.411418	0.420635	-0.00921679	0.361612	0.0709136	0.290699	Weak
hematological	blood mean corpuscular hemoglobin concentration (MCHC)	B_MCHC	RGS10	10	119499828	119542708	protein_coding	-4.65517	3.24385e-06	0.00528748	NA	NA	NA	NA	Korean_Neg	0.121068	0.0496728	0.0379546	0.147875	0.187039	0.191447	-0.00440783	0.29309	0.326298	-0.0332087	Weak
hematological	blood mean corpuscular hemoglobin concentration (MCHC)	B_MCHC	SLC22A18	11	2899791	2925246	protein_coding	-4.1718	3.02617e-05	0.0493265	-2.85729	0.00427423	1	-1.31451	Korean_Neg	0.286089	0.461912	0.227603	0.297152	0.231898	0.377443	-0.145545	0.34362	0.315389	0.0282301	Weak
hematological	blood mean corpuscular hemoglobin concentration (MCHC)	B_MCHC	TMEM171	5	73120292	73131817	protein_coding	-6.84068	7.9549e-12	1.29665e-08	NA	NA	NA	NA	Korean_Neg	0.0587838	-0.00288038	0.0242284	0.081513	0.286638	0.11689	0.169748	0.405131	0.370316	0.0348153	Weak
hematological	blood mean corpuscular hemoglobin concentration (MCHC)	B_MCHC	GLMP	1	156290089	156295689	protein_coding	5.07253	3.93691e-07	0.000641717	3.27075	0.00107322	1	1.80179	Korean_Pos	0.0709662	0.609424	0.0814315	0.073683	0.306076	0.324408	-0.0183317	0.312294	0.30987	0.00242467	Weak
hematological	blood mean corpuscular hemoglobin concentration (MCHC)	B_MCHC	DENND4A	15	65658046	65792293	protein_coding	7.63477	2.29464e-14	3.74027e-11	-5.40804	6.39547e-08	7.06059e-05	13.0428	Korean_Pos_GTEx_Neg	0.0587826	0.0310458	0.0676902	0.063326	0.25221	0.720336	-0.468126	0.299811	0.280451	0.0193599	Complete
hematological	blood mean corpuscular hemoglobin concentration (MCHC)	B_MCHC	PSTPIP2	18	45983536	46072260	protein_coding	4.41527	1.01057e-05	0.0164723	-4.88732	1.02472e-06	0.00113129	9.30259	Korean_Pos_GTEx_Neg	0.0603512	0.125053	0.0716383	0.072115	0.233431	0.13869	0.0947409	0.147893	0.135282	0.0126114	Weak
hematological	blood mean corpuscular hemoglobin concentration (MCHC)	B_MCHC	ABO	9	133250401	133275214	protein_coding	9.94188	2.84895e-23	4.64379e-20	9.76752	1.61165e-22	1.77926e-19	0.174361	Korean_Pos_GTEx_Pos	0.446552	0.52755	0.424217	0.449283	0.248764	0.1771	0.071664	0.401208	0.253858	0.14735	Complete
hematological	blood mean corpuscular hemoglobin concentration (MCHC)	B_MCHC	CRAT	9	129094810	129111189	protein_coding	4.2844	1.83511e-05	0.0299123	4.86244	1.16232e-06	0.0012832	-0.578043	Korean_Pos_GTEx_Pos	0.186058	0.357672	0.15167	0.154675	0.26697	0.147498	0.119472	0.334864	0.328261	0.00660305	Strong
hematological	blood mean corpuscular volume (MCV)	B_MCV	LRRC37A	17	46292733	46337794	protein_coding	-4.04343	5.27399e-05	0.0859661	-5.53631	3.10173e-08	3.42431e-05	1.49288	GTEx_Neg	0.270911	0.271155	0.279374	0.2138	0.406231	0.784913	-0.378682	0.310305	0.281001	0.0293037	No
hematological	blood mean corpuscular volume (MCV)	B_MCV	MASTL	10	27155267	27186924	protein_coding	-3.53085	0.000414529	0.675683	-4.42898	9.48434e-06	0.0104707	0.898128	GTEx_Neg	0.360559	0.180022	0.349722	0.321143	0.293507	0.344503	-0.0509956	0.196706	0.208685	-0.0119786	Weak
hematological	blood mean corpuscular volume (MCV)	B_MCV	HBZ	16	152687	154503	protein_coding	-1.20567	0.22795	1	10.8049	3.45166e-27	3.81064e-24	-12.0106	GTEx_Pos	0.159056	0.438672	0.145451	0.191264	0.263691	0.211905	0.0517859	0.428469	0.358134	0.0703345	Complete
hematological	blood mean corpuscular volume (MCV)	B_MCV	MUC20	3	195720882	195741123	protein_coding	1.88078	0.060006	1	6.66669	2.63844e-11	2.91284e-08	-4.7859	GTEx_Pos	0.175444	0.48423	0.0847283	0.223625	0.239882	0.377354	-0.137472	0.368347	0.293348	0.0749992	No
hematological	blood mean corpuscular volume (MCV)	B_MCV	ODF3B	22	50530409	50532580	protein_coding	NA	NA	NA	9.86722	6.00532e-23	6.62988e-20	NA	GTEx_Pos	0.0419985	0.226351	0.0719976	0.073398	0.266486	0.241606	0.0248796	0.406815	0.352363	0.0544516	Complete
hematological	blood mean corpuscular volume (MCV)	B_MCV	PEAR1	1	156893698	156916434	protein_coding	-2.12596	0.0335103	1	6.35813	2.05648e-10	2.27035e-07	-8.48409	GTEx_Pos	0.0996346	0.0376306	0.0967276	0.135369	0.292571	0.211067	0.0815043	0.543623	0.518173	0.0254504	Weak
hematological	blood mean corpuscular volume (MCV)	B_MCV	SLC20A2	8	42416475	42541597	protein_coding	NA	NA	NA	6.53473	6.42198e-11	7.08987e-08	NA	GTEx_Pos	0.0398597	0.0302683	0.0635531	0.088511	0.277161	0.323392	-0.046231	0.590129	0.551236	0.038893	Complete
hematological	blood mean corpuscular volume (MCV)	B_MCV	TRIM58	1	247857199	247878205	protein_coding	0.765189	0.444162	1	8.80311	1.36445e-18	1.50635e-15	-8.03792	GTEx_Pos	0.0907763	0.0836986	0.0992603	0.15838	0.271627	0.266528	0.00509894	0.36519	0.394275	-0.0290852	Complete
hematological	blood mean corpuscular volume (MCV)	B_MCV	HECTD4	12	112160188	112382439	protein_coding	-6.00364	1.94017e-09	3.16247e-06	NA	NA	NA	NA	Korean_Neg	0.0898364	NA	NA	0.066577	0.362094	0.979479	-0.617386	NA	NA	NA	Complete
hematological	blood mean corpuscular volume (MCV)	B_MCV	MED24	17	40019097	40061215	protein_coding	-4.73177	2.23068e-06	0.00363601	1.39318	0.163571	1	-6.12494	Korean_Neg	0.0571728	0.10708	0.051291	0.072134	0.25953	0.255911	0.00361839	0.203082	0.283981	-0.0808994	Weak
hematological	blood mean corpuscular volume (MCV)	B_MCV	NPRL3	16	84274	138860	protein_coding	-7.87089	3.57844e-15	5.83286e-12	NA	NA	NA	NA	Korean_Neg	0.0531765	0.0199348	0.0151339	0.112664	0.273407	0.210751	0.062656	0.559285	0.371208	0.188077	Complete
hematological	blood mean corpuscular volume (MCV)	B_MCV	ABO	9	133250401	133275214	protein_coding	-12.4946	8.83335e-36	1.43984e-32	-11.5977	4.55888e-31	5.03301e-28	-0.89685	Korean_Neg_GTEx_Neg	0.446552	0.52755	0.424217	0.449283	0.248764	0.1771	0.071664	0.401208	0.253858	0.14735	Complete
hematological	blood mean corpuscular volume (MCV)	B_MCV	GLMP	1	156290089	156295689	protein_coding	-9.0912	1.00773e-19	1.64261e-16	-7.1002	1.25916e-12	1.39012e-09	-1.99099	Korean_Neg_GTEx_Neg	0.0709662	0.609424	0.0814315	0.073683	0.306076	0.324408	-0.0183317	0.312294	0.30987	0.00242467	Weak
hematological	blood mean corpuscular volume (MCV)	B_MCV	HEATR3	16	50065941	50106387	protein_coding	-5.09862	3.43153e-07	0.000559339	-5.65918	1.52773e-08	1.68662e-05	0.56056	Korean_Neg_GTEx_Neg	0.345128	0.356178	0.349621	0.272885	0.276045	0.264216	0.0118288	0.52499	0.455823	0.0691667	Strong
hematological	blood mean corpuscular volume (MCV)	B_MCV	INO80E	16	29995294	30005508	protein_coding	-5.5602	2.70578e-08	4.41042e-05	-5.19858	2.01451e-07	0.000222402	-0.361616	Korean_Neg_GTEx_Neg	0.0872916	0.070143	0.112234	0.083204	0.333329	0.388218	-0.0548888	0.21179	0.26533	-0.0535399	No
hematological	blood mean corpuscular volume (MCV)	B_MCV	PAQR6	1	156243322	156248117	protein_coding	-4.68075	2.86438e-06	0.00466895	-6.63621	3.245e-11	3.58248e-08	1.95547	Korean_Neg_GTEx_Neg	0.0793178	0.628948	0.090436	0.103386	0.265745	0.373019	-0.107274	0.301652	0.309193	-0.00754131	Weak
hematological	blood mean corpuscular volume (MCV)	B_MCV	SMG5	1	156249224	156282825	protein_coding	-6.60809	3.92478e-11	6.39739e-08	-6.65429	2.87049e-11	3.16902e-08	0.0462013	Korean_Neg_GTEx_Neg	0.241179	0.643643	0.258069	0.217137	0.449336	0.472288	-0.0229518	0.373254	0.388751	-0.0154967	Strong
hematological	blood mean corpuscular volume (MCV)	B_MCV	C1QTNF7	4	15339818	15446166	protein_coding	5.14256	2.71852e-07	0.000443119	NA	NA	NA	NA	Korean_Pos	0.097159	NA	NA	0.091316	0.377803	0.257957	0.119846	NA	NA	NA	No
hematological	blood mean corpuscular volume (MCV)	B_MCV	CPT1B	22	50568861	50578455	protein_coding	6.11766	9.55296e-10	1.55713e-06	-1.86467	0.0622323	1	7.98233	Korean_Pos	0.607713	0.408823	0.610755	0.556121	0.294114	0.152151	0.141963	0.503273	0.525603	-0.0223307	Weak
hematological	blood mean corpuscular volume (MCV)	B_MCV	FBXL5	4	15604539	15681661	protein_coding	5.40226	6.60507e-08	0.000107663	NA	NA	NA	NA	Korean_Pos	0.0513961	NA	NA	0.080052	0.466682	0.385341	0.0813408	NA	NA	NA	Strong
hematological	blood mean corpuscular volume (MCV)	B_MCV	FIGNL1	7	50444128	50450390	protein_coding	4.35708	1.3202e-05	0.0215193	3.7521	0.000175519	0.193773	0.604981	Korean_Pos	0.0576416	0.161335	0.0511169	0.089003	0.180728	0.385473	-0.204746	0.255315	0.283269	-0.0279536	Weak
hematological	blood mean corpuscular volume (MCV)	B_MCV	HLA-A	6	29941260	29945884	protein_coding	4.89357	9.92707e-07	0.00161811	-0.346728	0.728797	1	5.2403	Korean_Pos	0.655795	0.244848	0.159111	0.750068	0.247343	0.337991	-0.0906487	0.114808	0.161202	-0.0463932	Strong
hematological	blood mean corpuscular volume (MCV)	B_MCV	HLA-F	6	29722775	29738528	protein_coding	5.20826	1.91233e-07	0.00031171	-0.536477	0.591631	1	5.74474	Korean_Pos	0.215472	0.324348	0.0900954	0.373293	0.209187	0.228023	-0.0188366	0.224538	0.28573	-0.0611918	Weak
hematological	blood mean corpuscular volume (MCV)	B_MCV	SLC25A21	14	36679716	36875004	protein_coding	4.56403	5.02773e-06	0.0081952	NA	NA	NA	NA	Korean_Pos	0.0570386	0.0259485	0.0177862	0.070248	0.208888	0.143355	0.0655329	0.426631	0.33046	0.096171	Weak
hematological	blood mean corpuscular volume (MCV)	B_MCV	TREML4	6	41228324	41238882	protein_coding	5.82826	5.62863e-09	9.17467e-06	-2.2045	0.0274928	1	8.03276	Korean_Pos	0.117918	0.676409	0.13591	0.160803	0.235616	0.26694	-0.0313231	0.272916	0.424157	-0.151241	No
hematological	blood mean corpuscular volume (MCV)	B_MCV	DENND4A	15	65658046	65792293	protein_coding	8.30725	9.99103e-17	1.62854e-13	-6.12832	8.93486e-10	9.86409e-07	14.4356	Korean_Pos_GTEx_Neg	0.0587826	0.0310458	0.0676902	0.063326	0.25221	0.720336	-0.468126	0.299811	0.280451	0.0193599	Complete
hematological	blood mean corpuscular volume (MCV)	B_MCV	ITSN1	21	33642400	33899861	protein_coding	5.64805	1.62993e-08	2.65678e-05	5.18669	2.14739e-07	0.000237072	0.461357	Korean_Pos_GTEx_Pos	0.147203	0.0763645	0.128206	0.146181	0.380018	0.541587	-0.161568	0.753534	0.56464	0.188895	Strong
hematological	blood mean corpuscular volume (MCV)	B_MCV	TYMP	22	50525752	50530056	protein_coding	10.1805	2.53233e-24	4.1277e-21	9.96541	2.24985e-23	2.48384e-20	0.215126	Korean_Pos_GTEx_Pos	0.147166	0.333109	0.159919	0.198	0.275599	0.293779	-0.0181797	0.340357	0.303827	0.0365303	Strong
hematological	blood mean corpuscular volume (MCV)	B_MCV	YPEL3	16	30092314	30096244	protein_coding	5.88192	4.07631e-09	6.64438e-06	6.2631	3.7989e-10	4.19398e-07	-0.38118	Korean_Pos_GTEx_Pos	0.0758802	0.0959578	0.0812412	0.075164	0.212418	0.147696	0.0647216	0.399172	0.524699	-0.125527	Weak
hematological	blood platelet	B_PLAT	BAK1	6	33572547	33580293	protein_coding	NA	NA	NA	-12.7648	2.87599e-37	3.17509e-34	NA	GTEx_Neg	0.0491769	0.526692	0.0723273	0.072972	0.241445	0.218966	0.0224792	0.396701	0.437953	-0.0412519	Complete
hematological	blood platelet	B_PLAT	DOCK7	1	62454298	62688368	protein_coding	-4.09233	4.27607e-05	0.0697	-4.46215	8.12843e-06	0.00897378	0.369824	GTEx_Neg	0.0732837	0.0912172	0.0718326	0.101541	0.224087	0.32213	-0.0980434	0.352695	0.375576	-0.0228817	Complete
hematological	blood platelet	B_PLAT	ETV7	6	36354091	36387800	protein_coding	-3.63416	0.000279118	0.454963	-4.67514	2.94378e-06	0.00324994	1.04098	GTEx_Neg	0.193659	0.428202	0.2184	0.235428	0.296811	0.335588	-0.0387767	0.400464	0.445807	-0.0453434	Complete
hematological	blood platelet	B_PLAT	HLA-B	6	31269491	31356442	protein_coding	-1.86372	0.0623656	1	-4.29574	1.74381e-05	0.0192517	2.43202	GTEx_Neg	0.663548	0.263087	0.0678217	0.752257	0.219457	0.229957	-0.0104993	0.302048	0.306745	-0.00469711	Complete
hematological	blood platelet	B_PLAT	BTN3A2	6	26365159	26378320	protein_coding	4.03066	5.56866e-05	0.0907691	4.33333	1.47107e-05	0.0162406	-0.302661	GTEx_Pos	0.373392	0.606505	0.33735	0.424988	0.103999	0.127014	-0.0230148	0.402718	0.356833	0.0458851	No
hematological	blood platelet	B_PLAT	HLA-DQB1	6	32659467	32668383	protein_coding	2.26885	0.0232812	1	4.38261	1.1746e-05	0.0129675	-2.11377	GTEx_Pos	0.556382	0.660168	0.45751	0.474161	0.323106	0.39818	-0.0750733	0.5622	0.407308	0.154892	Weak
hematological	blood platelet	B_PLAT	HLA-DRB1	6	32578769	32589848	protein_coding	3.3867	0.000707822	1	4.32	1.56273e-05	0.0172525	-0.933299	GTEx_Pos	0.668791	0.17682	0.190039	0.5911	0.233385	0.230848	0.00253692	0.205166	0.241154	-0.0359876	Complete
hematological	blood platelet	B_PLAT	JAKMIP1	4	6026199	6200591	protein_coding	-0.122315	0.90265	1	4.99223	5.98494e-07	0.000660737	-5.11455	GTEx_Pos	0.212128	0.162275	0.211746	0.334727	0.242389	0.340053	-0.0976636	0.442456	0.400005	0.0424514	Strong
hematological	blood platelet	B_PLAT	PLOD1	1	11934205	11975538	protein_coding	-2.56401	0.0103493	1	7.18211	6.94246e-13	7.66447e-10	-9.74612	GTEx_Pos	0.248654	0.338742	0.215397	0.28954	0.219	0.224138	-0.00513739	0.335575	0.32771	0.00786434	Complete
hematological	blood platelet	B_PLAT	SKIV2L	6	31959111	31969755	protein_coding	3.82097	0.000133061	0.21689	4.63274	3.61594e-06	0.00399199	-0.811777	GTEx_Pos	0.103335	0.30443	0.11766	0.195359	0.203996	0.213716	-0.00971953	0.620278	0.490704	0.129574	Strong
hematological	blood platelet	B_PLAT	TBC1D14	4	6909242	7030553	protein_coding	NA	NA	NA	5.14177	2.72993e-07	0.000301384	NA	GTEx_Pos	0.0374315	0.0411189	0.0520216	0.108167	0.262488	0.309516	-0.0470279	0.278176	0.143345	0.134831	Complete
hematological	blood platelet	B_PLAT	TRIM58	1	247857199	247878205	protein_coding	2.50488	0.012252	1	5.01146	5.41679e-07	0.000598014	-2.50659	GTEx_Pos	0.0907763	0.0836986	0.0992603	0.15838	0.271627	0.266528	0.00509894	0.36519	0.394275	-0.0290852	Complete
hematological	blood platelet	B_PLAT	VARS2	6	30914205	30926459	protein_coding	NA	NA	NA	4.89316	9.94811e-07	0.00109827	NA	GTEx_Pos	0.0362913	0.550286	0.0599631	0.006671	0.18274	0.479553	-0.296813	0.320712	0.317488	0.00322404	Weak
hematological	blood platelet	B_PLAT	ABCC4	13	95019829	95301446	protein_coding	-8.37904	5.44796e-17	8.88018e-14	NA	NA	NA	NA	Korean_Neg	0.404178	0.09258	0.0129786	0.470525	0.316811	0.313287	0.00352418	0.320171	0.271128	0.0490431	Complete
hematological	blood platelet	B_PLAT	ANKDD1A	15	64911902	64958700	protein_coding	-4.54877	5.40645e-06	0.00881252	NA	NA	NA	NA	Korean_Neg	0.149734	0.220544	0.0245353	0.276715	0.201554	0.485145	-0.28359	0.338139	0.347533	-0.00939443	No
hematological	blood platelet	B_PLAT	BTN3A3	6	26440472	26453415	protein_coding	-4.35979	1.30401e-05	0.0212553	NA	NA	NA	NA	Korean_Neg	0.1634	NA	NA	0.293905	0.133204	0.190424	-0.0572209	NA	NA	NA	Weak
hematological	blood platelet	B_PLAT	MINK1	17	4833388	4897773	protein_coding	-4.33128	1.48483e-05	0.0242027	NA	NA	NA	NA	Korean_Neg	0.0532581	NA	NA	0.094537	0.14137	0.317979	-0.176609	NA	NA	NA	Complete
hematological	blood platelet	B_PLAT	NME4	16	396725	400759	protein_coding	-4.92978	8.2538e-07	0.00134537	0.366712	0.713835	1	-5.29649	Korean_Neg	0.214301	0.151329	0.0709142	0.328173	0.258249	0.223308	0.0349409	0.288321	0.308423	-0.0201013	Weak
hematological	blood platelet	B_PLAT	ABO	9	133250401	133275214	protein_coding	-5.15287	2.57328e-07	0.000419445	-5.56427	2.64348e-08	2.9184e-05	0.411405	Korean_Neg_GTEx_Neg	0.446552	0.52755	0.424217	0.449283	0.248764	0.1771	0.071664	0.401208	0.253858	0.14735	Complete
hematological	blood platelet	B_PLAT	SH3BGRL3	1	26279176	26281327	protein_coding	-4.25772	2.06831e-05	0.0337135	4.44572	8.77506e-06	0.00968767	-8.70344	Korean_Neg_GTEx_Pos	0.190312	0.0495358	0.134953	0.12457	0.362081	0.719806	-0.357725	0.457125	0.362981	0.0941444	Strong
hematological	blood platelet	B_PLAT	C6orf48	6	31834608	31839766	protein_coding	4.378	1.19973e-05	0.0195555	NA	NA	NA	NA	Korean_Pos	0.14136	0.0885843	0.0245969	0.209661	0.236833	0.199017	0.0378158	0.314487	0.366763	-0.0522767	Weak
hematological	blood platelet	B_PLAT	FADS2	11	61816256	61867354	protein_coding	6.46414	1.02644e-10	1.67309e-07	2.39563	0.0165949	1	4.06851	Korean_Pos	0.0826164	0.606665	0.0718299	0.086314	0.473707	0.352886	0.120821	0.532941	0.390588	0.142353	Complete
hematological	blood platelet	B_PLAT	GPSM3	6	32190766	32194829	protein_coding	7.15417	8.51215e-13	1.38748e-09	NA	NA	NA	NA	Korean_Pos	0.110592	NA	NA	0.126495	0.185605	0.167619	0.0179859	NA	NA	NA	Weak
hematological	blood platelet	B_PLAT	HECTD4	12	112160188	112382439	protein_coding	6.44721	1.14774e-10	1.87082e-07	NA	NA	NA	NA	Korean_Pos	0.0898364	NA	NA	0.066577	0.362094	0.979479	-0.617386	NA	NA	NA	Strong
hematological	blood platelet	B_PLAT	HLA-DRA	6	32439842	32445046	protein_coding	6.12353	9.20789e-10	1.50089e-06	NA	NA	NA	NA	Korean_Pos	0.169651	NA	NA	0.200132	0.264098	0.332087	-0.0679897	NA	NA	NA	Weak
hematological	blood platelet	B_PLAT	LST1	6	31586124	31588894	protein_coding	4.46493	8.02373e-06	0.0130787	NA	NA	NA	NA	Korean_Pos	0.193935	0.0699598	0.0172669	0.268008	0.256425	0.202078	0.0543467	0.335055	0.340786	-0.00573138	Weak
hematological	blood platelet	B_PLAT	MYRF	11	61752649	61788518	protein_coding	5.2258	1.73975e-07	0.00028358	NA	NA	NA	NA	Korean_Pos	0.0554098	0.133607	0.0329705	0.065741	0.430281	0.317187	0.113094	0.184495	0.327209	-0.142714	Weak
hematological	blood platelet	B_PLAT	PDIA5	3	123067062	123162104	protein_coding	6.11667	9.61258e-10	1.56685e-06	NA	NA	NA	NA	Korean_Pos	0.0687225	0.0278714	1.59137e-05	0.139525	0.376838	0.5493	-0.172463	0.469805	0.261026	0.208778	Complete
hematological	blood platelet	B_PLAT	POU5F1	6	31164337	31180731	protein_coding	5.38229	7.38153e-08	0.000120319	NA	NA	NA	NA	Korean_Pos	0.057741	0.192914	0.00467539	0.114435	0.195879	0.241521	-0.0456423	0.335583	0.279544	0.0560385	Weak
hematological	blood platelet	B_PLAT	ZNF367	9	96385941	96418329	protein_coding	4.42702	9.57101e-06	0.0156007	NA	NA	NA	NA	Korean_Pos	0.076821	NA	NA	0.09344	0.388299	0.476879	-0.0885795	NA	NA	NA	No
hematological	blood platelet	B_PLAT	ZNF787	19	56087366	56121280	protein_coding	8.69818	3.45447e-18	5.63079e-15	NA	NA	NA	NA	Korean_Pos	0.0870034	NA	NA	0.107083	0.276196	0.24487	0.0313267	NA	NA	NA	No
hematological	blood platelet	B_PLAT	NDFIP1	5	142108505	142154443	protein_coding	6.32131	2.61134e-10	4.25648e-07	-6.06456	1.33089e-09	1.46931e-06	12.3859	Korean_Pos_GTEx_Neg	0.0929672	0.0324793	0.091055	0.088881	0.362497	0.354316	0.0081807	0.3211	0.347547	-0.0264476	Complete
hematological	blood platelet	B_PLAT	HLA-DQA1	6	32628179	32643652	protein_coding	4.75141	2.02459e-06	0.00330008	5.0483	4.47038e-07	0.00049353	-0.296887	Korean_Pos_GTEx_Pos	0.542499	0.307414	0.459149	0.422773	0.208591	0.222653	-0.0140622	0.289473	0.287051	0.002422	Weak
hematological	blood platelet	B_PLAT	MFN2	1	11980181	12013514	protein_coding	7.25264	4.13538e-13	6.74067e-10	7.33336	2.27217e-13	2.50848e-10	-0.0807181	Korean_Pos_GTEx_Pos	0.459942	0.653182	0.394416	0.392329	0.279756	0.310002	-0.030246	0.269503	0.272645	-0.00314247	Complete
hematological	Blood red blood cells (RBC)	B_RBC_B	HBZ	16	152687	154503	protein_coding	0.472937	0.63626	1	-6.76016	1.39065e-11	1.53528e-08	7.2331	GTEx_Neg	0.159056	0.438672	0.145451	0.191264	0.263691	0.211905	0.0517859	0.428469	0.358134	0.0703345	Complete
hematological	Blood red blood cells (RBC)	B_RBC_B	ODF3B	22	50530409	50532580	protein_coding	NA	NA	NA	-5.59112	2.26567e-08	2.50129e-05	NA	GTEx_Neg	0.0419985	0.226351	0.0719976	0.073398	0.266486	0.241606	0.0248796	0.406815	0.352363	0.0544516	Strong
hematological	Blood red blood cells (RBC)	B_RBC_B	PEAR1	1	156893698	156916434	protein_coding	3.01363	0.00258249	1	-4.21331	2.52014e-05	0.0278223	7.22694	GTEx_Neg	0.0996346	0.0376306	0.0967276	0.135369	0.292571	0.211067	0.0815043	0.543623	0.518173	0.0254504	Weak
hematological	Blood red blood cells (RBC)	B_RBC_B	TRIM58	1	247857199	247878205	protein_coding	-1.33297	0.182548	1	-4.27949	1.87606e-05	0.0207117	2.94652	GTEx_Neg	0.0907763	0.0836986	0.0992603	0.15838	0.271627	0.266528	0.00509894	0.36519	0.394275	-0.0290852	Complete
hematological	Blood red blood cells (RBC)	B_RBC_B	LRRC37A	17	46292733	46337794	protein_coding	3.73228	0.000189924	0.309577	5.0003	5.73978e-07	0.000633672	-1.26802	GTEx_Pos	0.270911	0.271155	0.279374	0.2138	0.406231	0.784913	-0.378682	0.310305	0.281001	0.0293037	No
hematological	Blood red blood cells (RBC)	B_RBC_B	MASTL	10	27155267	27186924	protein_coding	4.15888	3.20248e-05	0.0522004	4.64374	3.42861e-06	0.00378518	-0.484864	GTEx_Pos	0.360559	0.180022	0.349722	0.321143	0.293507	0.344503	-0.0509956	0.196706	0.208685	-0.0119786	Weak
hematological	Blood red blood cells (RBC)	B_RBC_B	PAQR6	1	156243322	156248117	protein_coding	2.4774	0.0132369	1	4.26173	2.03154e-05	0.0224282	-1.78433	GTEx_Pos	0.0793178	0.628948	0.090436	0.103386	0.265745	0.373019	-0.107274	0.301652	0.309193	-0.00754131	Weak
hematological	Blood red blood cells (RBC)	B_RBC_B	SURF6	9	133328774	133336398	protein_coding	NA	NA	NA	4.85067	1.23348e-06	0.00136176	NA	GTEx_Pos	0.0413864	0.377049	0.0559949	0.069453	0.284393	0.388859	-0.104466	0.431293	0.335452	0.0958412	No
hematological	Blood red blood cells (RBC)	B_RBC_B	DDX39B	6	31530233	31542448	protein_coding	-6.63226	3.33308e-11	5.43292e-08	NA	NA	NA	NA	Korean_Neg	0.0542163	0.257835	0.00105943	0.09249	0.158059	0.198696	-0.040637	0.281804	0.349656	-0.0678521	Weak
hematological	Blood red blood cells (RBC)	B_RBC_B	DENND4A	15	65658046	65792293	protein_coding	-4.88889	1.01661e-06	0.00165707	3.37491	0.000738851	0.815691	-8.2638	Korean_Neg	0.0587826	0.0310458	0.0676902	0.063326	0.25221	0.720336	-0.468126	0.299811	0.280451	0.0193599	Complete
hematological	Blood red blood cells (RBC)	B_RBC_B	HLA-DQA2	6	32741342	32747215	protein_coding	-4.37732	1.20343e-05	0.0196159	NA	NA	NA	NA	Korean_Neg	0.323845	0.698103	0.0485646	0.315278	0.254831	0.286609	-0.0317777	0.411536	0.309253	0.102284	Complete
hematological	Blood red blood cells (RBC)	B_RBC_B	TREML4	6	41228324	41238882	protein_coding	-4.92759	8.34641e-07	0.00136047	0.948255	0.343003	1	-5.87585	Korean_Neg	0.117918	0.676409	0.13591	0.160803	0.235616	0.26694	-0.0313231	0.272916	0.424157	-0.151241	No
hematological	Blood red blood cells (RBC)	B_RBC_B	FIGNL1	7	50444128	50450390	protein_coding	-4.69227	2.70768e-06	0.00441352	-4.5273	5.9853e-06	0.00660777	-0.164968	Korean_Neg_GTEx_Neg	0.0576416	0.161335	0.0511169	0.089003	0.180728	0.385473	-0.204746	0.255315	0.283269	-0.0279536	Weak
hematological	Blood red blood cells (RBC)	B_RBC_B	ITIH4	3	52812975	52830739	protein_coding	-5.32674	1.00342e-07	0.000163558	-5.1567	2.5212e-07	0.00027834	-0.17004	Korean_Neg_GTEx_Neg	0.38098	0.413051	0.361292	0.320714	0.312615	0.247107	0.0655087	0.592988	0.355826	0.237162	Strong
hematological	Blood red blood cells (RBC)	B_RBC_B	SCFD1	14	30622112	30735812	protein_coding	-4.37599	1.21081e-05	0.0197362	-4.22103	2.43532e-05	0.0268859	-0.154955	Korean_Neg_GTEx_Neg	0.124569	0.246835	0.127955	0.136254	0.337302	0.526114	-0.188812	0.325822	0.294845	0.0309766	Weak
hematological	Blood red blood cells (RBC)	B_RBC_B	TMEM110	3	52836219	52897596	protein_coding	-5.00925	5.4793e-07	0.000893126	-5.68326	1.32746e-08	1.46552e-05	0.674008	Korean_Neg_GTEx_Neg	0.122566	0.112255	0.10708	0.117992	0.282463	0.238741	0.043722	0.294216	0.382182	-0.0879668	No
hematological	Blood red blood cells (RBC)	B_RBC_B	TYMP	22	50525752	50530056	protein_coding	-5.88974	3.88815e-09	6.33768e-06	-5.58161	2.39303e-08	2.6419e-05	-0.308126	Korean_Neg_GTEx_Neg	0.147166	0.333109	0.159919	0.198	0.275599	0.293779	-0.0181797	0.340357	0.303827	0.0365303	Complete
hematological	Blood red blood cells (RBC)	B_RBC_B	YPEL3	16	30092314	30096244	protein_coding	-7.41272	1.25315e-13	2.04263e-10	-7.52761	5.23779e-14	5.78252e-11	0.114892	Korean_Neg_GTEx_Neg	0.0758802	0.0959578	0.0812412	0.075164	0.212418	0.147696	0.0647216	0.399172	0.524699	-0.125527	Weak
hematological	Blood red blood cells (RBC)	B_RBC_B	C6orf48	6	31834608	31839766	protein_coding	7.44486	9.83072e-14	1.60241e-10	NA	NA	NA	NA	Korean_Pos	0.14136	0.0885843	0.0245969	0.209661	0.236833	0.199017	0.0378158	0.314487	0.366763	-0.0522767	Weak
hematological	Blood red blood cells (RBC)	B_RBC_B	FADS2	11	61816256	61867354	protein_coding	5.22553	1.74226e-07	0.000283988	2.51873	0.0117805	1	2.7068	Korean_Pos	0.0826164	0.606665	0.0718299	0.086314	0.473707	0.352886	0.120821	0.532941	0.390588	0.142353	Strong
hematological	Blood red blood cells (RBC)	B_RBC_B	GPSM3	6	32190766	32194829	protein_coding	4.27377	1.92488e-05	0.0313755	NA	NA	NA	NA	Korean_Pos	0.110592	NA	NA	0.126495	0.185605	0.167619	0.0179859	NA	NA	NA	Weak
hematological	Blood red blood cells (RBC)	B_RBC_B	HECTD4	12	112160188	112382439	protein_coding	7.39028	1.48364e-13	2.41833e-10	NA	NA	NA	NA	Korean_Pos	0.0898364	NA	NA	0.066577	0.362094	0.979479	-0.617386	NA	NA	NA	Complete
hematological	Blood red blood cells (RBC)	B_RBC_B	HLA-B	6	31269491	31356442	protein_coding	4.58748	4.49516e-06	0.00732711	0.2443	0.806999	1	4.34318	Korean_Pos	0.663548	0.263087	0.0678217	0.752257	0.219457	0.229957	-0.0104993	0.302048	0.306745	-0.00469711	Complete
hematological	Blood red blood cells (RBC)	B_RBC_B	INTS1	7	1470277	1504367	protein_coding	4.52044	6.18262e-06	0.0100777	NA	NA	NA	NA	Korean_Pos	0.239213	0.362262	0.0306026	0.482828	0.277929	0.461754	-0.183825	0.290742	0.279673	0.0110684	No
hematological	Blood red blood cells (RBC)	B_RBC_B	NPRL3	16	84274	138860	protein_coding	4.29839	1.7231e-05	0.0280866	NA	NA	NA	NA	Korean_Pos	0.0531765	0.0199348	0.0151339	0.112664	0.273407	0.210751	0.062656	0.559285	0.371208	0.188077	Complete
hematological	Blood red blood cells (RBC)	B_RBC_B	ABO	9	133250401	133275214	protein_coding	15.6301	5.79592e-55	9.44735e-52	13.1893	1.14415e-39	1.26314e-36	2.44074	Korean_Pos_GTEx_Pos	0.446552	0.52755	0.424217	0.449283	0.248764	0.1771	0.071664	0.401208	0.253858	0.14735	Complete
hematological	Blood red blood cells (RBC)	B_RBC_B	GLMP	1	156290089	156295689	protein_coding	6.43389	1.25289e-10	2.04221e-07	4.67909	2.88761e-06	0.00318793	1.7548	Korean_Pos_GTEx_Pos	0.0709662	0.609424	0.0814315	0.073683	0.306076	0.324408	-0.0183317	0.312294	0.30987	0.00242467	Weak
hematological	Blood red blood cells (RBC)	B_RBC_B	HEATR3	16	50065941	50106387	protein_coding	4.67856	2.89512e-06	0.00471905	4.45264	8.49699e-06	0.00938068	0.225918	Korean_Pos_GTEx_Pos	0.345128	0.356178	0.349621	0.272885	0.276045	0.264216	0.0118288	0.52499	0.455823	0.0691667	Strong
hematological	Blood red blood cells (RBC)	B_RBC_B	INO80E	16	29995294	30005508	protein_coding	6.73041	1.70657e-11	2.78171e-08	6.44727	1.1472e-10	1.26651e-07	0.283142	Korean_Pos_GTEx_Pos	0.0872916	0.070143	0.112234	0.083204	0.333329	0.388218	-0.0548888	0.21179	0.26533	-0.0535399	No
hematological	Blood red blood cells (RBC)	B_RBC_B	KLC1	14	103561896	103714104	protein_coding	6.49878	8.15913e-11	1.32994e-07	4.95192	7.3677e-07	0.000813394	1.54685	Korean_Pos_GTEx_Pos	0.0634867	0.201661	0.0684722	0.101868	0.308659	0.370556	-0.061897	0.482518	0.513557	-0.0310397	Weak
hematological	Blood red blood cells (RBC)	B_RBC_B	MED22	9	133338323	133348131	protein_coding	5.69595	1.23247e-08	2.00892e-05	5.65412	1.57339e-08	1.73702e-05	0.0418272	Korean_Pos_GTEx_Pos	0.0509047	0.292927	0.0807514	0.095659	0.335778	0.481845	-0.146067	0.308455	0.380806	-0.072351	No
hematological	Blood red blood cells (RBC)	B_RBC_B	NT5DC2	3	52524496	52535054	protein_coding	5.52376	3.33151e-08	5.43036e-05	5.36775	8.0012e-08	8.83333e-05	0.156013	Korean_Pos_GTEx_Pos	0.0761879	0.160246	0.0858324	0.066309	0.382598	0.364076	0.0185221	0.378038	0.358915	0.0191231	Weak
hematological	Blood red blood cells (RBC)	B_RBC_B	SMG5	1	156249224	156282825	protein_coding	4.42162	9.81311e-06	0.0159954	4.21606	2.4896e-05	0.0274852	0.205558	Korean_Pos_GTEx_Pos	0.241179	0.643643	0.258069	0.217137	0.449336	0.472288	-0.0229518	0.373254	0.388751	-0.0154967	Strong
hematological	blood white blood cells (WBC)	B_WBC_B	HLA-DPA1	6	33064569	33073772	protein_coding	-0.2304	0.817782	1	-4.98559	6.1941e-07	0.000683829	4.75519	GTEx_Neg	0.463426	0.0126476	0.223394	0.432314	0.310351	0.420024	-0.109673	0.438028	0.450473	-0.0124456	Weak
hematological	blood white blood cells (WBC)	B_WBC_B	HLA-DRB1	6	32578769	32589848	protein_coding	-1.06985	0.284691	1	-7.74725	9.53329e-15	1.05248e-11	6.6774	GTEx_Neg	0.668791	0.17682	0.190039	0.5911	0.233385	0.230848	0.00253692	0.205166	0.241154	-0.0359876	Weak
hematological	blood white blood cells (WBC)	B_WBC_B	MICA	6	31399784	31415315	protein_coding	-2.73323	0.00627349	1	-4.84427	1.27388e-06	0.00140636	2.11104	GTEx_Neg	0.373262	0.352137	0.238996	0.392822	0.253819	0.233217	0.0206025	0.322138	0.288106	0.0340321	Weak
hematological	blood white blood cells (WBC)	B_WBC_B	SLIT1	10	96998038	97185920	protein_coding	NA	NA	NA	-4.96283	6.9657e-07	0.000769014	NA	GTEx_Neg	0.0476976	0.286313	0.0798605	0.089466	0.225041	0.283688	-0.0586472	0.197075	0.272418	-0.0753425	No
hematological	blood white blood cells (WBC)	B_WBC_B	WIPF2	17	40219304	40284136	protein_coding	NA	NA	NA	-4.25291	2.11322e-05	0.02333	NA	GTEx_Neg	0.0335178	0.00775767	0.0524933	0.081144	0.28089	0.220223	0.060667	0.296134	0.259672	0.036462	No
hematological	blood white blood cells (WBC)	B_WBC_B	DEF6	6	35297852	35321771	protein_coding	NA	NA	NA	4.40502	1.0595e-05	0.0116969	NA	GTEx_Pos	0.0417763	0.23535	0.0550018	0.101184	0.271125	0.248793	0.0223316	0.417532	0.441002	-0.02347	Complete
hematological	blood white blood cells (WBC)	B_WBC_B	PNKD	2	218270392	218346793	protein_coding	NA	NA	NA	4.75392	1.9996e-06	0.00220756	NA	GTEx_Pos	0.0457746	0.131588	0.0550381	0.06339	0.290832	0.323303	-0.0324702	0.186661	0.243642	-0.056981	Complete
hematological	blood white blood cells (WBC)	B_WBC_B	CNN2	19	1026581	1039068	protein_coding	-4.55099	5.34959e-06	0.00871983	NA	NA	NA	NA	Korean_Neg	0.0897014	0.257132	0.000286089	0.146345	0.217084	0.246095	-0.029011	0.266444	0.185054	0.0813903	Weak
hematological	blood white blood cells (WBC)	B_WBC_B	DDX39B	6	31530233	31542448	protein_coding	-4.49725	6.89631e-06	0.011241	NA	NA	NA	NA	Korean_Neg	0.0542163	0.257835	0.00105943	0.09249	0.158059	0.198696	-0.040637	0.281804	0.349656	-0.0678521	Weak
hematological	blood white blood cells (WBC)	B_WBC_B	ICAM5	19	10289981	10296778	protein_coding	-5.08495	3.68799e-07	0.000601142	NA	NA	NA	NA	Korean_Neg	0.0955585	0.0203632	0.0386505	0.084099	0.346198	0.237227	0.108971	0.402605	0.322731	0.0798742	Weak
hematological	blood white blood cells (WBC)	B_WBC_B	MED24	17	40019097	40061215	protein_coding	-15.9274	5.31643e-57	8.66578e-54	1.44039	0.149763	1	-17.3678	Korean_Neg	0.0571728	0.10708	0.051291	0.072134	0.25953	0.255911	0.00361839	0.203082	0.283981	-0.0808994	Complete
hematological	blood white blood cells (WBC)	B_WBC_B	MICB	6	31494881	31511124	protein_coding	-6.98948	2.78701e-12	4.54282e-09	NA	NA	NA	NA	Korean_Neg	0.0849115	0.35986	0.00853809	0.128279	0.174271	0.202687	-0.0284158	0.459356	0.438812	0.0205441	Weak
hematological	blood white blood cells (WBC)	B_WBC_B	RBPMS2	15	64739892	64775587	protein_coding	-5.50361	3.7357e-08	6.08919e-05	NA	NA	NA	NA	Korean_Neg	0.161802	0.256388	0.0127386	0.539864	0.197957	0.313519	-0.115562	0.393335	0.330894	0.0624404	No
hematological	blood white blood cells (WBC)	B_WBC_B	GIT1	17	29573469	29594054	protein_coding	-4.71646	2.40507e-06	0.00392026	-4.23566	2.28211e-05	0.0251944	-0.4808	Korean_Neg_GTEx_Neg	0.0946947	0.132793	0.0986409	0.097863	0.29342	0.42387	-0.13045	0.234277	0.23068	0.00359756	No
hematological	blood white blood cells (WBC)	B_WBC_B	NT5C2	10	103090611	103193306	protein_coding	-4.57574	4.75466e-06	0.00775009	-5.14674	2.65871e-07	0.000293522	0.570996	Korean_Neg_GTEx_Neg	0.0882994	0.0410606	0.100669	0.083519	0.299391	0.110693	0.188698	0.306878	0.328479	-0.0216015	Weak
hematological	blood white blood cells (WBC)	B_WBC_B	ARPC2	2	218217094	218254356	protein_coding	4.18352	2.87428e-05	0.0468507	3.73841	0.000185356	0.204633	0.44511	Korean_Pos	0.0826864	0.0241443	0.100819	0.083201	0.385274	0.431538	-0.046265	0.39005	0.347479	0.0425717	Complete
hematological	blood white blood cells (WBC)	B_WBC_B	HLA-B	6	31269491	31356442	protein_coding	5.02701	4.99568e-07	0.000814296	1.57946	0.114236	1	3.44755	Korean_Pos	0.663548	0.263087	0.0678217	0.752257	0.219457	0.229957	-0.0104993	0.302048	0.306745	-0.00469711	Complete
hematological	blood white blood cells (WBC)	B_WBC_B	ITPR3	6	33620365	33696574	protein_coding	5.64346	1.67397e-08	2.72857e-05	0.648779	0.516483	1	4.99468	Korean_Pos	0.253827	0.243963	0.236261	0.377612	0.241886	0.343333	-0.101447	0.349563	0.380512	-0.0309491	Weak
hematological	blood white blood cells (WBC)	B_WBC_B	NR1D1	17	40092787	40100725	protein_coding	5.64856	1.62512e-08	2.64895e-05	NA	NA	NA	NA	Korean_Pos	0.0732682	NA	NA	0.094053	0.296613	0.426819	-0.130206	NA	NA	NA	Complete
hematological	blood white blood cells (WBC)	B_WBC_B	THRA	17	40058290	40093867	protein_coding	5.36999	7.90255e-08	0.000128812	NA	NA	NA	NA	Korean_Pos	0.0942605	NA	NA	0.106217	0.302799	0.469836	-0.167037	NA	NA	NA	Weak
hematological	blood white blood cells (WBC)	B_WBC_B	LY75	2	159803355	159904749	protein_coding	4.83662	1.32381e-06	0.00215782	4.96923	6.73986e-07	0.000744081	-0.132608	Korean_Pos_GTEx_Pos	0.319768	0.371291	0.288646	0.310151	0.284414	0.368474	-0.08406	0.241248	0.257433	-0.0161852	Complete
hematological	blood white blood cells (WBC)	B_WBC_B	SSH2	17	29625938	29930276	protein_coding	4.40941	1.03827e-05	0.0169239	4.37175	1.23454e-05	0.0136293	0.0376568	Korean_Pos_GTEx_Pos	0.0814134	0.0865254	0.0885152	0.149918	0.229137	0.399302	-0.170165	0.227807	0.253668	-0.0258608	Complete
kidney diseases	kidney disease	B_KD	ZNF623	8	143636013	143656418	protein_coding	4.1998	4.16028e-06	0.00678126	4.13004	1.46872e-05	0.0162146	0.069762	Korean_Pos_GTEx_Pos	0.0703845	0.113724	0.0831586	0.124027	0.119698	0.32253	-0.202833	0.380778	0.281238	0.0995399	No
kidney related	blood creatinine	B_CREATINE	CCS	11	66593084	66606019	protein_coding	-2.16163	0.0306499	1	-4.24678	2.17111e-05	0.0239691	2.08515	GTEx_Neg	0.150542	0.134015	0.123067	0.175941	0.29678	0.336698	-0.0399182	0.371394	0.401568	-0.0301734	Strong
kidney related	blood creatinine	B_CREATINE	NRG1	8	31639386	32767959	protein_coding	-3.44315	0.000575278	0.937704	-4.11057	3.95088e-05	0.0436177	0.667416	GTEx_Neg	0.245515	0.212656	0.199217	0.242743	0.195466	0.423395	-0.227929	0.39001	0.329956	0.0600536	Strong
kidney related	blood creatinine	B_CREATINE	VARS2	6	30914205	30926459	protein_coding	NA	NA	NA	-4.3339	1.46671e-05	0.0161925	NA	GTEx_Neg	0.0362913	0.550286	0.0599631	0.006671	0.18274	0.479553	-0.296813	0.320712	0.317488	0.00322404	Strong
kidney related	blood creatinine	B_CREATINE	ZFP57	6	29672392	29681110	protein_coding	0.408819	0.682673	1	-5.4391	5.37068e-08	5.92924e-05	5.84792	GTEx_Neg	0.411788	0.633202	0.382752	0.565657	0.200281	0.152373	0.047908	0.251651	0.331887	-0.0802355	No
kidney related	blood creatinine	B_CREATINE	HLA-A	6	29941260	29945884	protein_coding	-3.19772	0.00138575	1	6.17489	6.6531e-10	7.34502e-07	-9.3726	GTEx_Pos	0.655795	0.244848	0.159111	0.750068	0.247343	0.337991	-0.0906487	0.114808	0.161202	-0.0463932	Strong
kidney related	blood creatinine	B_CREATINE	GATM	15	45361124	45402327	protein_coding	-4.92088	8.63272e-07	0.00140713	NA	NA	NA	NA	Korean_Neg	0.0841284	0.0900842	0.0305926	0.075715	0.211669	0.613136	-0.401467	0.475804	0.408273	0.0675312	Strong
kidney related	blood creatinine	B_CREATINE	INTS1	7	1470277	1504367	protein_coding	-6.27855	3.43509e-10	5.59919e-07	NA	NA	NA	NA	Korean_Neg	0.239213	0.362262	0.0306026	0.482828	0.277929	0.461754	-0.183825	0.290742	0.279673	0.0110684	Weak
kidney related	blood creatinine	B_CREATINE	NFATC1	18	79395856	79529325	protein_coding	-6.61979	3.61999e-11	5.90058e-08	-3.67609	0.00023699	0.261636	-2.94369	Korean_Neg	0.0782141	0.0764986	0.0678157	0.061456	0.353384	0.268506	0.0848777	0.289191	0.299024	-0.00983238	Complete
kidney related	blood creatinine	B_CREATINE	ZNF257	19	22052452	22091480	protein_coding	-4.44322	8.87418e-06	0.0144649	-3.81489	0.000136346	0.150525	-0.628329	Korean_Neg	0.122926	0.157884	0.128464	0.116142	0.290617	0.274319	0.0162986	0.19964	0.266411	-0.0667711	No
kidney related	blood creatinine	B_CREATINE	ANKRD18B	9	33524394	33573009	protein_coding	4.26372	2.01283e-05	0.0328092	NA	NA	NA	NA	Korean_Pos	0.050217	NA	NA	0.087426	0.237877	0.234366	0.00351041	NA	NA	NA	No
kidney related	blood creatinine	B_CREATINE	HECTD4	12	112160188	112382439	protein_coding	4.96976	6.71737e-07	0.00109493	NA	NA	NA	NA	Korean_Pos	0.0898364	NA	NA	0.066577	0.362094	0.979479	-0.617386	NA	NA	NA	Strong
kidney related	blood creatinine	B_CREATINE	CTSW	11	65879809	65883741	protein_coding	4.88879	1.01657e-06	0.00165701	4.89579	9.8103e-07	0.00108306	-0.0070039	Korean_Pos_GTEx_Pos	0.568444	0.344017	0.561188	0.612737	0.250387	0.171994	0.0783929	0.391355	0.427885	-0.0365302	Strong
kidney related	blood creatinine	B_CREATINE	SPATA5L1	15	45402331	45421419	protein_coding	4.6156	3.92574e-06	0.00639895	5.05363	4.34455e-07	0.000479638	-0.438028	Korean_Pos_GTEx_Pos	0.0627582	0.351029	0.0867305	0.095805	0.190126	0.5878	-0.397674	0.423806	0.316451	0.107355	Complete
kidney related	blood eGFR	B_EGFR	HLA-A	6	29941260	29945884	protein_coding	2.78284	0.00538977	1	-5.91365	3.35983e-09	3.70925e-06	8.69649	GTEx_Neg	0.655795	0.244848	0.159111	0.750068	0.247343	0.337991	-0.0906487	0.114808	0.161202	-0.0463932	Strong
kidney related	blood eGFR	B_EGFR	CCS	11	66593084	66606019	protein_coding	2.21337	0.0268749	1	4.58011	4.65435e-06	0.00513841	-2.36674	GTEx_Pos	0.150542	0.134015	0.123067	0.175941	0.29678	0.336698	-0.0399182	0.371394	0.401568	-0.0301734	Strong
kidney related	blood eGFR	B_EGFR	NRG1	8	31639386	32767959	protein_coding	3.89945	9.64891e-05	0.157277	4.23902	2.24752e-05	0.0248126	-0.339565	GTEx_Pos	0.245515	0.212656	0.199217	0.242743	0.195466	0.423395	-0.227929	0.39001	0.329956	0.0600536	Complete
kidney related	blood eGFR	B_EGFR	ZFP57	6	29672392	29681110	protein_coding	-0.537452	0.590957	1	5.27824	1.30771e-07	0.000144371	-5.8157	GTEx_Pos	0.411788	0.633202	0.382752	0.565657	0.200281	0.152373	0.047908	0.251651	0.331887	-0.0802355	No
kidney related	blood eGFR	B_EGFR	GNAS	20	58840845	58911192	protein_coding	-4.38628	1.15451e-05	0.0188186	NA	NA	NA	NA	Korean_Neg	0.0638279	0.0272872	0.049876	0.109986	0.198311	0.148256	0.0500554	0.548102	0.53832	0.0097821	Complete
kidney related	blood eGFR	B_EGFR	HECTD4	12	112160188	112382439	protein_coding	-4.92858	8.29969e-07	0.00135285	NA	NA	NA	NA	Korean_Neg	0.0898364	NA	NA	0.066577	0.362094	0.979479	-0.617386	NA	NA	NA	Strong
kidney related	blood eGFR	B_EGFR	CTSW	11	65879809	65883741	protein_coding	-4.67214	2.98565e-06	0.00486661	-4.66377	3.1097e-06	0.0034331	-0.00836788	Korean_Neg_GTEx_Neg	0.568444	0.344017	0.561188	0.612737	0.250387	0.171994	0.0783929	0.391355	0.427885	-0.0365302	Strong
kidney related	blood eGFR	B_EGFR	SPATA5L1	15	45402331	45421419	protein_coding	-5.07564	3.87061e-07	0.00063091	-5.45804	4.82862e-08	5.33079e-05	0.382397	Korean_Neg_GTEx_Neg	0.0627582	0.351029	0.0867305	0.095805	0.190126	0.5878	-0.397674	0.423806	0.316451	0.107355	Complete
kidney related	blood eGFR	B_EGFR	GATM	15	45361124	45402327	protein_coding	5.29129	1.21778e-07	0.000198499	NA	NA	NA	NA	Korean_Pos	0.0841284	0.0900842	0.0305926	0.075715	0.211669	0.613136	-0.401467	0.475804	0.408273	0.0675312	Strong
kidney related	blood eGFR	B_EGFR	INTS1	7	1470277	1504367	protein_coding	6.494	8.4077e-11	1.37046e-07	NA	NA	NA	NA	Korean_Pos	0.239213	0.362262	0.0306026	0.482828	0.277929	0.461754	-0.183825	0.290742	0.279673	0.0110684	Weak
kidney related	blood eGFR	B_EGFR	NFATC1	18	79395856	79529325	protein_coding	6.5038	7.87823e-11	1.28415e-07	3.80221	0.000143516	0.158442	2.70158	Korean_Pos	0.0782141	0.0764986	0.0678157	0.061456	0.353384	0.268506	0.0848777	0.289191	0.299024	-0.00983238	Complete
kidney related	blood eGFR	B_EGFR	RMDN1	8	86468504	86514357	protein_coding	4.19696	2.70819e-05	0.0441436	4.01771	5.88203e-05	0.0649377	0.179246	Korean_Pos	0.0579831	0.292593	0.0769126	0.058108	0.453083	0.701036	-0.247953	0.242261	0.27348	-0.0312196	Strong
kidney related	blood urea nitrogen (BUN)	B_BUN	ATP6V0E2	7	149872968	149880698	protein_coding	-2.42787	0.0151901	1	-4.46552	7.99854e-06	0.00883039	2.03765	GTEx_Neg	0.0727061	0.27213	0.0757442	0.127634	0.206575	0.285419	-0.0788434	0.432848	0.411188	0.0216595	Strong
kidney related	blood urea nitrogen (BUN)	B_BUN	GRHL1	2	9951693	10002277	protein_coding	-5.33343	9.66376e-08	0.000157519	NA	NA	NA	NA	Korean_Neg	0.178737	NA	NA	0.224201	0.183681	0.214148	-0.0304672	NA	NA	NA	Complete
kidney related	blood urea nitrogen (BUN)	B_BUN	INTS1	7	1470277	1504367	protein_coding	-4.34699	1.38189e-05	0.0225248	NA	NA	NA	NA	Korean_Neg	0.239213	0.362262	0.0306026	0.482828	0.277929	0.461754	-0.183825	0.290742	0.279673	0.0110684	Weak
kidney related	blood urea nitrogen (BUN)	B_BUN	FAM84B	8	126552442	126558393	protein_coding	-9.92807	3.24261e-23	5.28546e-20	-9.78485	1.3471e-22	1.48719e-19	-0.143221	Korean_Neg_GTEx_Neg	0.10903	0.052274	0.128165	0.149963	0.175296	0.107151	0.0681455	0.476433	0.455203	0.0212302	No
kidney related	blood urea nitrogen (BUN)	B_BUN	PAX8	2	113215997	113278950	protein_coding	-10.0929	6.14015e-24	1.00084e-20	-10.0716	7.622e-24	8.41469e-21	-0.0212648	Korean_Neg_GTEx_Neg	0.210758	0.29862	0.203031	0.21018	0.32174	0.434623	-0.112882	0.309473	0.179966	0.129506	Complete
kidney related	blood urea nitrogen (BUN)	B_BUN	GNAS	20	58840845	58911192	protein_coding	6.48474	8.94057e-11	1.45731e-07	NA	NA	NA	NA	Korean_Pos	0.0638279	0.0272872	0.049876	0.109986	0.198311	0.148256	0.0500554	0.548102	0.53832	0.0097821	Complete
kidney related	blood urea nitrogen (BUN)	B_BUN	HECTD4	12	112160188	112382439	protein_coding	5.63135	1.79403e-08	2.92427e-05	NA	NA	NA	NA	Korean_Pos	0.0898364	NA	NA	0.066577	0.362094	0.979479	-0.617386	NA	NA	NA	Complete
kidney related	blood urea nitrogen (BUN)	B_BUN	ULK4	3	41246599	41962430	protein_coding	4.41856	9.94919e-06	0.0162172	4.37365	1.2234e-05	0.0135064	0.0449083	Korean_Pos_GTEx_Pos	0.187153	0.331668	0.211542	0.112375	0.149533	0.122206	0.0273268	0.353283	0.366589	-0.0133067	Strong
liver & kidney related	blood albumin	B_ALBUMIN	GLYCTK	3	52287089	52293476	protein_coding	NA	NA	NA	-4.49472	6.976e-06	0.00770151	NA	GTEx_Neg	0.0491575	0.135992	0.0700277	0.083889	0.31208	0.430657	-0.118577	0.684887	0.6171	0.0677873	Strong
liver & kidney related	blood albumin	B_ALBUMIN	TMEM121	14	105526603	105530202	protein_coding	3.69621	0.00021899	0.356954	4.15969	3.19013e-05	0.035219	-0.463483	GTEx_Pos	0.163021	0.202651	0.181236	0.189499	0.401408	0.241025	0.160383	0.533901	0.493083	0.0408176	No
liver & kidney related	blood albumin	B_ALBUMIN	ANXA3	4	78551519	78610421	protein_coding	-4.85407	1.2118e-06	0.00197524	NA	NA	NA	NA	Korean_Neg	0.446782	NA	NA	0.440824	0.257049	0.115181	0.141869	NA	NA	NA	Strong
liver & kidney related	blood albumin	B_ALBUMIN	PPM1M	3	52245793	52250597	protein_coding	-4.43196	9.35071e-06	0.0152417	NA	NA	NA	NA	Korean_Neg	0.114241	NA	NA	0.210788	0.26222	0.327554	-0.065334	NA	NA	NA	Strong
liver & kidney related	blood albumin	B_ALBUMIN	RGS12	4	3314147	3439913	protein_coding	-5.55093	2.85054e-08	4.64637e-05	-5.10986	3.23136e-07	0.000356742	-0.441069	Korean_Neg_GTEx_Neg	0.0832874	0.046738	0.0788903	0.158491	0.348487	0.380434	-0.0319475	0.275802	0.223623	0.0521791	Complete
liver & kidney related	blood albumin	B_ALBUMIN	SERPINF2	17	1742836	1755268	protein_coding	-4.67104	3.00163e-06	0.00489265	-5.43049	5.63649e-08	6.22269e-05	0.759443	Korean_Neg_GTEx_Neg	0.101235	0.156543	0.109554	0.143995	0.237669	0.370521	-0.132852	0.541194	0.358886	0.182308	Complete
liver & kidney related	blood albumin	B_ALBUMIN	ITGA3	17	50055968	50090481	protein_coding	4.20664	2.59474e-05	0.0422943	NA	NA	NA	NA	Korean_Pos	0.074285	NA	NA	0.084798	0.317434	0.184545	0.132889	NA	NA	NA	Strong
liver & kidney related	blood albumin	B_ALBUMIN	NSG1	4	4348140	4418967	protein_coding	6.94244	3.88345e-12	6.33003e-09	0.883385	0.377031	1	6.05905	Korean_Pos	0.225179	0.447484	0.182718	0.362951	0.262176	0.243165	0.0190107	0.428704	0.370528	0.0581765	Strong
liver & kidney related	blood albumin	B_ALBUMIN	PAG1	8	80967810	81112068	protein_coding	4.41883	9.93687e-06	0.0161971	NA	NA	NA	NA	Korean_Pos	0.0522278	0.0953568	0.0240218	0.104262	0.20601	0.298318	-0.0923081	0.366003	0.326432	0.0395702	Strong
liver & kidney related	blood albumin	B_ALBUMIN	RPH3A	12	112570380	112898881	protein_coding	4.24248	2.21314e-05	0.0360742	4.00158	6.2977e-05	0.0695266	0.240895	Korean_Pos	0.124991	0.530523	0.148492	0.1957	0.348022	0.474263	-0.12624	0.350782	0.364585	-0.0138033	Complete
liver & kidney related	blood albumin	B_ALBUMIN	SH3BP1	22	37634654	37656117	protein_coding	5.25714	1.46689e-07	0.000239103	NA	NA	NA	NA	Korean_Pos	0.171371	0.474743	8.80794e-05	0.25175	0.324343	0.364525	-0.0401819	0.186809	0.197824	-0.0110151	Strong
liver & kidney related	blood albumin	B_ALBUMIN	ABO	9	133250401	133275214	protein_coding	4.87607	1.08428e-06	0.00176738	4.74049	2.13572e-06	0.00235784	0.135582	Korean_Pos_GTEx_Pos	0.446552	0.52755	0.424217	0.449283	0.248764	0.1771	0.071664	0.401208	0.253858	0.14735	Complete
liver & kidney related	blood albumin	B_ALBUMIN	C1QTNF4	11	47589664	47594659	protein_coding	4.2176	2.47185e-05	0.0402911	4.46268	8.10538e-06	0.00894833	-0.245071	Korean_Pos_GTEx_Pos	0.0616028	0.16364	0.078015	0.110117	0.414471	0.325963	0.0885072	0.364232	0.148974	0.215258	Strong
liver & kidney related	blood albumin	B_ALBUMIN	MYBPC3	11	47331397	47352702	protein_coding	5.04448	4.5576e-07	0.000742889	4.21716	2.47676e-05	0.0273434	0.827322	Korean_Pos_GTEx_Pos	0.0938217	0.191141	0.0861547	0.150464	0.229494	0.282335	-0.0528411	0.193222	0.2335	-0.0402787	Weak
liver related	blood alanine aminotransferase (ALT)	B_ALT	DEF6	6	35297852	35321771	protein_coding	NA	NA	NA	-4.13909	3.49057e-05	0.0385359	NA	GTEx_Neg	0.0417763	0.23535	0.0550018	0.101184	0.271125	0.248793	0.0223316	0.417532	0.441002	-0.02347	Strong
liver related	blood alanine aminotransferase (ALT)	B_ALT	ABO	9	133250401	133275214	protein_coding	4.02622	5.67336e-05	0.0924758	4.13413	3.56681e-05	0.0393776	-0.107903	GTEx_Pos	0.446552	0.52755	0.424217	0.449283	0.248764	0.1771	0.071664	0.401208	0.253858	0.14735	Strong
liver related	blood alanine aminotransferase (ALT)	B_ALT	FADS2	11	61816256	61867354	protein_coding	-5.51456	3.50756e-08	5.71733e-05	-1.51968	0.128596	1	-3.99488	Korean_Neg	0.0826164	0.606665	0.0718299	0.086314	0.473707	0.352886	0.120821	0.532941	0.390588	0.142353	Complete
liver related	blood alanine aminotransferase (ALT)	B_ALT	CDK2AP1	12	123261484	123272334	protein_coding	-4.38427	1.16526e-05	0.0189937	-4.5293	5.92678e-06	0.00654317	0.145024	Korean_Neg_GTEx_Neg	0.0834992	0.239527	0.0983651	0.066017	0.295189	0.208078	0.087111	0.38995	0.371701	0.018249	Strong
liver related	blood alanine aminotransferase (ALT)	B_ALT	HSD17B11	4	87336610	87391386	protein_coding	-8.50429	1.85904e-17	3.03024e-14	-5.74555	9.19659e-09	1.0153e-05	-2.75874	Korean_Neg_GTEx_Neg	0.0797655	0.0838931	0.0632462	0.09404	0.311958	0.277318	0.0346395	0.49126	0.332353	0.158907	Strong
liver related	blood alanine aminotransferase (ALT)	B_ALT	SERINC2	1	31409565	31434680	protein_coding	4.87185	1.10773e-06	0.0018056	0.830325	0.406357	1	4.04153	Korean_Pos	0.160333	0.33395	0.0986381	0.166376	0.228136	0.215425	0.012711	0.408562	0.450315	-0.0417536	Strong
liver related	blood aspartate aminotransferase (AST)	B_AST	DEF6	6	35297852	35321771	protein_coding	NA	NA	NA	-5.3515	8.74722e-08	9.65694e-05	NA	GTEx_Neg	0.0417763	0.23535	0.0550018	0.101184	0.271125	0.248793	0.0223316	0.417532	0.441002	-0.02347	Strong
liver related	blood aspartate aminotransferase (AST)	B_AST	B4GALT1	9	33104082	33167356	protein_coding	-5.10805	3.2626e-07	0.000531804	NA	NA	NA	NA	Korean_Neg	0.129207	NA	NA	0.172046	0.260012	0.356703	-0.0966906	NA	NA	NA	Complete
liver related	blood aspartate aminotransferase (AST)	B_AST	HECTD4	12	112160188	112382439	protein_coding	-6.06142	1.35547e-09	2.20941e-06	NA	NA	NA	NA	Korean_Neg	0.0898364	NA	NA	0.066577	0.362094	0.979479	-0.617386	NA	NA	NA	Complete
liver related	blood aspartate aminotransferase (AST)	B_AST	HLA-DQB2	6	32756098	32763534	protein_coding	-4.52416	6.07245e-06	0.0098981	-0.585473	0.558232	1	-3.93869	Korean_Neg	0.320287	0.638368	0.0972869	0.306599	0.261614	0.211164	0.0504501	0.358003	0.358332	-0.000329318	Strong
liver related	blood aspartate aminotransferase (AST)	B_AST	HSD17B11	4	87336610	87391386	protein_coding	-5.7467	9.13427e-09	1.48889e-05	-3.90222	9.53944e-05	0.105315	-1.84448	Korean_Neg	0.0797655	0.0838931	0.0632462	0.09404	0.311958	0.277318	0.0346395	0.49126	0.332353	0.158907	Strong
liver related	blood aspartate aminotransferase (AST)	B_AST	RAB24	5	177301451	177303744	protein_coding	-4.88937	1.01361e-06	0.00165219	NA	NA	NA	NA	Korean_Neg	0.099435	NA	NA	0.112215	0.420776	0.634169	-0.213393	NA	NA	NA	Strong
liver related	blood aspartate aminotransferase (AST)	B_AST	CTSH	15	78921058	78949574	protein_coding	-4.70004	2.60552e-06	0.00424699	-4.78392	1.72224e-06	0.00190135	0.0838771	Korean_Neg_GTEx_Neg	0.0904302	0.324386	0.124098	0.064983	0.223326	0.248381	-0.0250545	0.129274	0.175161	-0.0458872	Strong
liver related	blood aspartate aminotransferase (AST)	B_AST	PRELID1	5	177303774	177304850	protein_coding	-4.69596	2.65813e-06	0.00433276	-4.21271	2.52604e-05	0.0278875	-0.483243	Korean_Neg_GTEx_Neg	0.119939	0.194944	0.141342	0.101033	0.50373	0.645593	-0.141863	0.343248	0.358035	-0.0147865	No
liver related	blood aspartate aminotransferase (AST)	B_AST	RPH3A	12	112570380	112898881	protein_coding	5.15993	2.47645e-07	0.000403662	4.82037	1.43565e-06	0.00158496	0.339566	Korean_Pos_GTEx_Pos	0.124991	0.530523	0.148492	0.1957	0.348022	0.474263	-0.12624	0.350782	0.364585	-0.0138033	No
liver related	blood gamma-glutamyl transferase	B_R_GTP	DLG5	10	77793544	77926526	protein_coding	-0.3986	0.690189	1	10.4331	1.83225e-25	2.0228e-22	-10.8317	GTEx_Pos	0.284898	0.281802	0.178969	0.20461	0.288341	0.302769	-0.0144275	0.38748	0.235521	0.151959	Complete
liver related	blood gamma-glutamyl transferase	B_R_GTP	HECTD4	12	112160188	112382439	protein_coding	-9.83472	8.26953e-23	1.34793e-19	NA	NA	NA	NA	Korean_Neg	0.0898364	NA	NA	0.066577	0.362094	0.979479	-0.617386	NA	NA	NA	Complete
liver related	blood gamma-glutamyl transferase	B_R_GTP	HSD17B11	4	87336610	87391386	protein_coding	-5.55306	2.81777e-08	4.59296e-05	-1.61647	0.105997	1	-3.93659	Korean_Neg	0.0797655	0.0838931	0.0632462	0.09404	0.311958	0.277318	0.0346395	0.49126	0.332353	0.158907	Strong
liver related	blood gamma-glutamyl transferase	B_R_GTP	MAP3K11	11	65597755	65614249	protein_coding	-4.2632	2.01797e-05	0.032893	NA	NA	NA	NA	Korean_Neg	0.14059	0.209919	0.155225	0.128535	0.320087	0.315146	0.00494069	0.253919	0.29112	-0.0372012	Strong
liver related	blood gamma-glutamyl transferase	B_R_GTP	SYNJ2	6	157981887	158099176	protein_coding	-4.99619	5.86227e-07	0.00095555	NA	NA	NA	NA	Korean_Neg	0.135245	0.136337	0.000398941	0.34497	0.211057	0.363119	-0.152062	0.292361	0.330781	-0.0384198	Complete
liver related	blood gamma-glutamyl transferase	B_R_GTP	RPH3A	12	112570380	112898881	protein_coding	10.5887	3.52799e-26	5.75063e-23	9.98101	1.91716e-23	2.11654e-20	0.607675	Korean_Pos_GTEx_Pos	0.124991	0.530523	0.148492	0.1957	0.348022	0.474263	-0.12624	0.350782	0.364585	-0.0138033	No
liver related	blood gamma-glutamyl transferase	B_R_GTP	SRP14	15	40035739	40039188	protein_coding	5.28981	1.22827e-07	0.000200209	4.24645	2.17475e-05	0.0240093	1.04336	Korean_Pos_GTEx_Pos	0.0573427	0.0432354	0.0700915	0.078541	0.176155	0.233711	-0.0575562	0.274189	0.347989	-0.0737993	No
liver related	blood gamma-glutamyl transferase	B_R_GTP	UPB1	22	24494107	24528390	protein_coding	8.84169	9.65183e-19	1.57325e-15	7.76121	8.53143e-15	9.4187e-12	1.08049	Korean_Pos_GTEx_Pos	0.134683	0.108344	0.142865	0.15707	0.440197	0.376232	0.0639659	0.222083	0.245535	-0.0234519	Strong
liver related	blood total bilirubin	B_T_BIL	LINC00565	13	113926514	113928844	lincRNA	4.37922	1.19316e-05	0.0194484	3.03933	0.00237209	1	1.33989	Korean_Pos	0.0705518	0.194621	0.0573169	0.096688	0.2943	0.290758	0.00354196	0.361599	0.340682	0.0209163	No
liver related	blood total bilirubin	B_T_BIL	SCARB1	12	124776856	124882668	protein_coding	4.71555	2.41627e-06	0.00393852	3.60185	0.000316231	0.349119	1.1137	Korean_Pos	0.0504867	0.0706817	0.0701363	0.123509	0.34513	0.182404	0.162726	0.281439	0.281563	-0.000123966	Complete
liver related	blood total bilirubin	B_T_BIL	USP40	2	233475520	233566782	protein_coding	8.38029	5.39802e-17	8.79877e-14	NA	NA	NA	NA	Korean_Pos	0.145877	0.0771115	0.00376093	0.131592	0.186092	0.184263	0.00182913	0.660107	0.483268	0.17684	Complete
metabolic	blood glucose	B_GLU0	C10orf11	10	75431453	76560167	protein_coding	NA	NA	NA	-4.72889	2.26149e-06	0.00249669	NA	GTEx_Neg	0.023416	0.228033	0.0579151	0.102668	0.344197	0.332897	0.0112996	0.311838	0.269877	0.0419602	Complete
metabolic	blood glucose	B_GLU0	CRIPAK	4	1391552	1395989	protein_coding	-0.454086	0.649768	1	-5.69077	1.26918e-08	1.40117e-05	5.23669	GTEx_Neg	0.110971	0.490214	0.0519327	0.138409	0.225942	0.275718	-0.0497761	0.247755	0.161117	0.0866373	No
metabolic	blood glucose	B_GLU0	UVSSA	4	1347266	1388049	protein_coding	0.876808	0.380594	1	-5.37474	7.69152e-08	8.49143e-05	6.25154	GTEx_Neg	0.118094	0.282961	0.0680554	0.119473	0.25265	0.323954	-0.071304	0.301208	0.341239	-0.0400307	Strong
metabolic	blood glucose	B_GLU0	MAN2A2	15	90902218	90922584	protein_coding	3.9744	7.06212e-05	0.115113	4.08809	4.35373e-05	0.0480651	-0.113694	GTEx_Pos	0.127412	0.0812759	0.12659	0.121119	0.337442	0.356976	-0.0195343	0.381541	0.375841	0.00569971	No
metabolic	blood glucose	B_GLU0	WIPI1	17	68425930	68457513	protein_coding	-2.28229	0.0224751	1	4.58013	4.65413e-06	0.00513816	-6.86241	GTEx_Pos	0.0711929	0.176505	0.075493	0.114995	0.216605	0.175463	0.0411418	0.366197	0.397601	-0.0314049	Strong
metabolic	blood glucose	B_GLU0	FADS2	11	61816256	61867354	protein_coding	-6.96563	3.29513e-12	5.37106e-09	0.0361046	0.971199	1	-7.00174	Korean_Neg	0.0826164	0.606665	0.0718299	0.086314	0.473707	0.352886	0.120821	0.532941	0.390588	0.142353	Complete
metabolic	blood glucose	B_GLU0	HECTD4	12	112160188	112382439	protein_coding	-6.2753	3.50794e-10	5.71795e-07	NA	NA	NA	NA	Korean_Neg	0.0898364	NA	NA	0.066577	0.362094	0.979479	-0.617386	NA	NA	NA	Strong
metabolic	blood glucose	B_GLU0	MYRF	11	61752649	61788518	protein_coding	-4.21649	2.48417e-05	0.040492	NA	NA	NA	NA	Korean_Neg	0.0554098	0.133607	0.0329705	0.065741	0.430281	0.317187	0.113094	0.184495	0.327209	-0.142714	Complete
metabolic	blood glucose	B_GLU0	PDK1	2	172555373	172608669	protein_coding	8.74706	2.23249e-18	3.63896e-15	1.75577	0.0791324	1	6.9913	Korean_Pos	0.17373	0.089902	0.176667	0.149374	0.245988	0.209018	0.0369704	0.420411	0.480325	-0.0599134	Complete
metabolic	blood glucose	B_GLU0	RAB24	5	177301451	177303744	protein_coding	4.24209	2.21708e-05	0.0361383	NA	NA	NA	NA	Korean_Pos	0.099435	NA	NA	0.112215	0.420776	0.634169	-0.213393	NA	NA	NA	Strong
metabolic	blood glucose	B_GLU0	CAMK1D	10	12349482	12835545	protein_coding	7.712	1.25326e-14	2.04282e-11	6.90766	4.96496e-12	5.48131e-09	0.804343	Korean_Pos_GTEx_Pos	0.109249	0.103791	0.0793364	0.152155	0.335797	0.221737	0.11406	0.179691	0.210133	-0.0304423	Complete
metabolic	blood glucose	B_GLU0	RPH3A	12	112570380	112898881	protein_coding	4.92406	8.49404e-07	0.00138453	4.27776	1.89006e-05	0.0208663	0.646297	Korean_Pos_GTEx_Pos	0.124991	0.530523	0.148492	0.1957	0.348022	0.474263	-0.12624	0.350782	0.364585	-0.0138033	Strong
metabolic	blood HbA1C (hemoglobin a1c)	B_HBA1C	MUC20	3	195720882	195741123	protein_coding	-1.67217	0.0944976	1	-4.20735	2.58879e-05	0.0285802	2.53518	GTEx_Neg	0.175444	0.48423	0.0847283	0.223625	0.239882	0.377354	-0.137472	0.368347	0.293348	0.0749992	No
metabolic	blood HbA1C (hemoglobin a1c)	B_HBA1C	PEAR1	1	156893698	156916434	protein_coding	1.68504	0.0919882	1	-7.33358	2.27777e-13	2.51466e-10	9.01862	GTEx_Neg	0.0996346	0.0376306	0.0967276	0.135369	0.292571	0.211067	0.0815043	0.543623	0.518173	0.0254504	No
metabolic	blood HbA1C (hemoglobin a1c)	B_HBA1C	SLC20A2	8	42416475	42541597	protein_coding	NA	NA	NA	4.907	9.27975e-07	0.00102448	NA	GTEx_Pos	0.0398597	0.0302683	0.0635531	0.088511	0.277161	0.323392	-0.046231	0.590129	0.551236	0.038893	Strong
metabolic	blood HbA1C (hemoglobin a1c)	B_HBA1C	TMC8	17	78130770	78142968	protein_coding	0.376777	0.706341	1	4.36987	1.24596e-05	0.0137554	-3.99309	GTEx_Pos	0.240302	0.175223	0.18984	0.346943	0.224474	0.215502	0.00897196	0.217182	0.288738	-0.0715553	No
metabolic	blood HbA1C (hemoglobin a1c)	B_HBA1C	WDR45B	17	82614562	82648553	protein_coding	1.92143	0.0546834	1	4.55	5.37835e-06	0.00593769	-2.62857	GTEx_Pos	0.119207	0.0924057	0.118333	0.226321	0.161751	0.189416	-0.027665	0.588828	0.575248	0.0135805	No
metabolic	blood HbA1C (hemoglobin a1c)	B_HBA1C	RP11-817O13.8	15	75368199	75369378	lincRNA	-4.55578	5.23266e-06	0.00852924	-2.96227	0.00305534	1	-1.5935	Korean_Neg	0.0794429	0.155627	0.0638891	0.088346	0.337265	0.251518	0.0857469	0.513892	0.275392	0.238501	No
metabolic	blood HbA1C (hemoglobin a1c)	B_HBA1C	TBCD	17	82752064	82945922	protein_coding	-5.45991	4.78848e-08	7.80523e-05	NA	NA	NA	NA	Korean_Neg	0.0569535	0.180675	0.0143118	0.084884	0.272197	0.31947	-0.0472732	0.447326	0.476808	-0.0294825	Strong
metabolic	blood HbA1C (hemoglobin a1c)	B_HBA1C	TMEM50A	1	25338214	25362248	protein_coding	-5.6	2.15577e-08	3.5139e-05	-3.31936	0.000902941	0.996847	-2.28064	Korean_Neg	0.0647276	0.266088	0.0521682	0.066695	0.261603	0.323561	-0.0619583	0.2616	0.242357	0.0192431	Weak
metabolic	blood HbA1C (hemoglobin a1c)	B_HBA1C	FADS2	11	61816256	61867354	protein_coding	-6.5894	4.4639e-11	7.27616e-08	-4.34496	1.39598e-05	0.0154116	-2.24443	Korean_Neg_GTEx_Neg	0.0826164	0.606665	0.0718299	0.086314	0.473707	0.352886	0.120821	0.532941	0.390588	0.142353	Strong
metabolic	blood HbA1C (hemoglobin a1c)	B_HBA1C	FN3K	17	82735575	82751197	protein_coding	-10.9453	7.57503e-28	1.23473e-24	-12.122	9.09365e-34	1.00394e-30	1.17671	Korean_Neg_GTEx_Neg	0.286882	0.177333	0.253083	0.304216	0.320017	0.312743	0.00727399	0.452741	0.506891	-0.0541502	Complete
metabolic	blood HbA1C (hemoglobin a1c)	B_HBA1C	MAN2C1	15	75358201	75368154	protein_coding	-4.60804	4.07571e-06	0.00664341	-4.22694	2.37346e-05	0.0262029	-0.381099	Korean_Neg_GTEx_Neg	0.535184	0.636727	0.460246	0.432303	0.36457	0.286768	0.0778017	0.276149	0.217875	0.0582744	Strong
metabolic	blood HbA1C (hemoglobin a1c)	B_HBA1C	RHD	1	25272393	25330445	protein_coding	-5.64811	1.63176e-08	2.65977e-05	-4.86713	1.13609e-06	0.00125424	-0.780988	Korean_Neg_GTEx_Neg	0.127734	0.647967	0.140755	0.000486	0.24324	0.260509	-0.0172684	0.27906	0.346421	-0.0673608	Strong
metabolic	blood HbA1C (hemoglobin a1c)	B_HBA1C	GPSM3	6	32190766	32194829	protein_coding	5.2247	1.75201e-07	0.000285578	NA	NA	NA	NA	Korean_Pos	0.110592	NA	NA	0.126495	0.185605	0.167619	0.0179859	NA	NA	NA	Strong
metabolic	blood HbA1C (hemoglobin a1c)	B_HBA1C	CAMK1D	10	12349482	12835545	protein_coding	8.01627	1.1156e-15	1.81843e-12	7.29619	3.00806e-13	3.3209e-10	0.72008	Korean_Pos_GTEx_Pos	0.109249	0.103791	0.0793364	0.152155	0.335797	0.221737	0.11406	0.179691	0.210133	-0.0304423	Strong
metabolic	blood HbA1C (hemoglobin a1c)	B_HBA1C	GLMP	1	156290089	156295689	protein_coding	11.0905	1.51651e-28	2.4719e-25	8.4187	3.91567e-17	4.3229e-14	2.67183	Korean_Pos_GTEx_Pos	0.0709662	0.609424	0.0814315	0.073683	0.306076	0.324408	-0.0183317	0.312294	0.30987	0.00242467	No
metabolic	blood HbA1C (hemoglobin a1c)	B_HBA1C	PAQR6	1	156243322	156248117	protein_coding	5.58492	2.35128e-08	3.83259e-05	7.89461	2.97663e-15	3.2862e-12	-2.30969	Korean_Pos_GTEx_Pos	0.0793178	0.628948	0.090436	0.103386	0.265745	0.373019	-0.107274	0.301652	0.309193	-0.00754131	No
metabolic	blood HbA1C (hemoglobin a1c)	B_HBA1C	SMG5	1	156249224	156282825	protein_coding	7.77504	7.699e-15	1.25494e-11	7.8283	5.05069e-15	5.57596e-12	-0.0532588	Korean_Pos_GTEx_Pos	0.241179	0.643643	0.258069	0.217137	0.449336	0.472288	-0.0229518	0.373254	0.388751	-0.0154967	No
metabolic	blood high density lipoprotein cholesterol	B_HDL	ACP2	11	47239302	47248906	protein_coding	NA	NA	NA	-4.87974	1.06432e-06	0.00117501	NA	GTEx_Neg	0.0358845	0.153175	0.0583857	0.059165	0.10905	0.210962	-0.101912	0.1931	0.0954549	0.0976451	Complete
metabolic	blood high density lipoprotein cholesterol	B_HDL	BAK1	6	33572547	33580293	protein_coding	NA	NA	NA	-4.57962	4.66531e-06	0.0051505	NA	GTEx_Neg	0.0491769	0.526692	0.0723273	0.072972	0.241445	0.218966	0.0224792	0.396701	0.437953	-0.0412519	Strong
metabolic	blood high density lipoprotein cholesterol	B_HDL	PRELID1	5	177303774	177304850	protein_coding	-4.05646	4.98701e-05	0.0812882	-4.08112	4.48627e-05	0.0495284	0.0246637	GTEx_Neg	0.119939	0.194944	0.141342	0.101033	0.50373	0.645593	-0.141863	0.343248	0.358035	-0.0147865	No
metabolic	blood high density lipoprotein cholesterol	B_HDL	DUS2	16	67987761	68079320	protein_coding	NA	NA	NA	7.84574	4.35752e-15	4.81071e-12	NA	GTEx_Pos	0.0353582	0.273495	0.0543368	0.034577	0.112193	0.164815	-0.0526216	0.559418	0.501232	0.0581864	Complete
metabolic	blood high density lipoprotein cholesterol	B_HDL	SUSD1	9	112040785	112175408	protein_coding	NA	NA	NA	4.66397	3.10679e-06	0.00342989	NA	GTEx_Pos	0.0377314	0.315039	0.0519886	0.066032	0.317546	0.30882	0.00872669	0.260766	0.208596	0.0521707	Weak
metabolic	blood high density lipoprotein cholesterol	B_HDL	ABCA1	9	104781002	104928237	protein_coding	-5.27822	1.30786e-07	0.000213181	NA	NA	NA	NA	Korean_Neg	0.0793419	NA	NA	0.110966	0.312074	0.244175	0.0678991	NA	NA	NA	Complete
metabolic	blood high density lipoprotein cholesterol	B_HDL	B4GALT1	9	33104082	33167356	protein_coding	-4.65422	3.25729e-06	0.00530939	NA	NA	NA	NA	Korean_Neg	0.129207	NA	NA	0.172046	0.260012	0.356703	-0.0966906	NA	NA	NA	Strong
metabolic	blood high density lipoprotein cholesterol	B_HDL	GSTM1	1	109687814	109693745	protein_coding	-4.6966	2.64974e-06	0.00431908	NA	NA	NA	NA	Korean_Neg	0.347413	0.333346	0.0261819	0.485388	0.225157	0.273162	-0.0480055	0.372968	0.292038	0.0809299	Complete
metabolic	blood high density lipoprotein cholesterol	B_HDL	GSTM2	1	109668022	109709551	protein_coding	-4.75937	1.9454e-06	0.003171	NA	NA	NA	NA	Korean_Neg	0.224566	0.337215	0.0455205	0.273264	0.218946	0.324071	-0.105125	0.316481	0.274985	0.0414962	Strong
metabolic	blood high density lipoprotein cholesterol	B_HDL	GSTM5	1	109712255	109775428	protein_coding	-4.624	3.77007e-06	0.00614522	NA	NA	NA	NA	Korean_Neg	0.216651	0.37645	0.0259487	0.256837	0.188142	0.356579	-0.168437	0.332015	0.321878	0.0101365	Strong
metabolic	blood high density lipoprotein cholesterol	B_HDL	HECTD4	12	112160188	112382439	protein_coding	-6.43316	1.25686e-10	2.04869e-07	NA	NA	NA	NA	Korean_Neg	0.0898364	NA	NA	0.066577	0.362094	0.979479	-0.617386	NA	NA	NA	Complete
metabolic	blood high density lipoprotein cholesterol	B_HDL	LTBP3	11	65538805	65558930	protein_coding	-4.56364	5.03485e-06	0.0082068	-3.66299	0.000249448	0.275391	-0.900652	Korean_Neg	0.0745633	0.0808279	0.063456	0.126285	0.260503	0.253743	0.00676036	0.353068	0.350552	0.00251543	Weak
metabolic	blood high density lipoprotein cholesterol	B_HDL	MACF1	1	39081316	39487177	protein_coding	-4.95481	7.25507e-07	0.00118258	NA	NA	NA	NA	Korean_Neg	0.0682353	NA	NA	0.099237	0.300904	0.297665	0.00323931	NA	NA	NA	Complete
metabolic	blood high density lipoprotein cholesterol	B_HDL	RBL2	16	53433977	53491039	protein_coding	-4.56312	5.04739e-06	0.00822724	-3.8287	0.000128921	0.142328	-0.734422	Korean_Neg	0.268322	0.119838	0.288247	0.24867	0.193819	0.420001	-0.226182	0.449278	0.629098	-0.17982	Strong
metabolic	blood high density lipoprotein cholesterol	B_HDL	ACSL5	10	112374018	112428380	protein_coding	-5.51951	3.41002e-08	5.55833e-05	-5.92666	3.10437e-09	3.42723e-06	0.407144	Korean_Neg_GTEx_Neg	0.10451	0.46162	0.112238	0.105265	0.36599	0.372827	-0.00683715	0.43753	0.342257	0.0952732	Strong
metabolic	blood high density lipoprotein cholesterol	B_HDL	TAGLN	11	117199321	117204336	protein_coding	-4.73264	2.21996e-06	0.00361853	-5.6415	1.69144e-08	1.86735e-05	0.908861	Korean_Neg_GTEx_Neg	0.566853	0.402657	0.564468	0.439018	0.290189	0.512356	-0.222167	0.405584	0.425207	-0.0196229	Complete
metabolic	blood high density lipoprotein cholesterol	B_HDL	UHRF1BP1	6	34792015	34883138	protein_coding	-4.17824	2.94082e-05	0.0479353	-4.11632	3.8536e-05	0.0425437	-0.0619253	Korean_Neg_GTEx_Neg	0.166918	0.382789	0.177248	0.097939	0.430807	0.323629	0.107178	0.345617	0.402488	-0.0568709	No
metabolic	blood high density lipoprotein cholesterol	B_HDL	NIPSNAP3A	9	104747688	104760122	protein_coding	-5.55563	2.775e-08	4.52325e-05	7.06265	1.647e-12	1.81829e-09	-12.6183	Korean_Neg_GTEx_Pos	0.180882	0.0921539	0.0803194	0.285842	0.232393	0.192812	0.039581	0.421894	0.303279	0.118615	Complete
metabolic	blood high density lipoprotein cholesterol	B_HDL	CD36	7	80369575	80677008	protein_coding	6.27767	3.45446e-10	5.63076e-07	NA	NA	NA	NA	Korean_Pos	0.18257	0.0910547	0.0317023	0.213593	0.222729	0.168225	0.0545041	0.352155	0.351662	0.000492447	Complete
metabolic	blood high density lipoprotein cholesterol	B_HDL	LIPC	15	58410569	58569843	protein_coding	18.0743	7.12575e-73	1.1615e-69	NA	NA	NA	NA	Korean_Pos	0.315918	0.247661	0.0271406	0.429973	0.202994	0.153548	0.0494459	0.46336	0.416458	0.0469018	Complete
metabolic	blood high density lipoprotein cholesterol	B_HDL	MT2A	16	56608199	56609497	protein_coding	5.75438	8.72804e-09	1.42267e-05	NA	NA	NA	NA	Korean_Pos	0.0824065	0.0241365	0.0929045	0.145178	0.292896	0.295891	-0.00299497	0.587461	0.249882	0.337579	Strong
metabolic	blood high density lipoprotein cholesterol	B_HDL	ZFP90	16	68530090	68576072	protein_coding	4.83376	1.34229e-06	0.00218794	NA	NA	NA	NA	Korean_Pos	0.253301	0.519745	0.258113	0.412287	0.138601	0.172282	-0.0336816	0.324333	0.387599	-0.0632659	No
metabolic	blood high density lipoprotein cholesterol	B_HDL	CDK2AP1	12	123261484	123272334	protein_coding	5.98629	2.15605e-09	3.51436e-06	6.5993	4.15702e-11	4.58935e-08	-0.613011	Korean_Pos_GTEx_Pos	0.0834992	0.239527	0.0983651	0.066017	0.295189	0.208078	0.087111	0.38995	0.371701	0.018249	No
metabolic	blood high density lipoprotein cholesterol	B_HDL	NECTIN2	19	44846175	44889228	protein_coding	4.43147	9.37188e-06	0.0152762	4.60918	4.04888e-06	0.00446997	-0.177712	Korean_Pos_GTEx_Pos	0.0540617	0.585598	0.0766936	0.043227	0.28172	0.363595	-0.0818742	0.435837	0.274265	0.161572	Complete
metabolic	blood high density lipoprotein cholesterol	B_HDL	RPH3A	12	112570380	112898881	protein_coding	6.76595	1.33357e-11	2.17372e-08	6.37847	1.79847e-10	1.98551e-07	0.387475	Korean_Pos_GTEx_Pos	0.124991	0.530523	0.148492	0.1957	0.348022	0.474263	-0.12624	0.350782	0.364585	-0.0138033	Complete
metabolic	blood high density lipoprotein cholesterol	B_HDL	SCARB1	12	124776856	124882668	protein_coding	6.29803	3.03017e-10	4.93917e-07	5.03202	4.86387e-07	0.000536971	1.26601	Korean_Pos_GTEx_Pos	0.0504867	0.0706817	0.0701363	0.123509	0.34513	0.182404	0.162726	0.281439	0.281563	-0.000123966	Complete
metabolic	blood low density lipoprotein cholesterol	B_LDL	IQGAP2	5	76403249	76708132	protein_coding	NA	NA	NA	-5.75892	8.49663e-09	9.38028e-06	NA	GTEx_Neg	0.0495886	0.159929	0.0695558	0.094018	0.346291	0.478125	-0.131834	0.396153	0.452002	-0.055849	Weak
metabolic	blood low density lipoprotein cholesterol	B_LDL	SCCPDH	1	246724047	246768137	protein_coding	-0.0377669	0.969874	1	-4.80313	1.56493e-06	0.00172768	4.76536	GTEx_Neg	0.0636424	0.0425547	0.0633301	0.106834	0.286474	0.264369	0.0221056	0.278456	0.208778	0.0696774	No
metabolic	blood low density lipoprotein cholesterol	B_LDL	SURF6	9	133328774	133336398	protein_coding	NA	NA	NA	-5.33573	9.5423e-08	0.000105347	NA	GTEx_Neg	0.0413864	0.377049	0.0559949	0.069453	0.284393	0.388859	-0.104466	0.431293	0.335452	0.0958412	No
metabolic	blood low density lipoprotein cholesterol	B_LDL	EFCAB13	17	47323290	47441312	protein_coding	-4.94317	7.70194e-07	0.00125542	0.241084	0.809491	1	-5.18425	Korean_Neg	0.392643	0.0781583	0.287182	0.363149	0.250387	0.164758	0.0856283	0.421803	0.347628	0.0741757	Complete
metabolic	blood low density lipoprotein cholesterol	B_LDL	FADS2	11	61816256	61867354	protein_coding	-7.96677	1.65027e-15	2.68994e-12	-3.26248	0.0011049	1	-4.70429	Korean_Neg	0.0826164	0.606665	0.0718299	0.086314	0.473707	0.352886	0.120821	0.532941	0.390588	0.142353	Complete
metabolic	blood low density lipoprotein cholesterol	B_LDL	MYRF	11	61752649	61788518	protein_coding	-5.03534	4.78053e-07	0.000779227	NA	NA	NA	NA	Korean_Neg	0.0554098	0.133607	0.0329705	0.065741	0.430281	0.317187	0.113094	0.184495	0.327209	-0.142714	Complete
metabolic	blood low density lipoprotein cholesterol	B_LDL	ABO	9	133250401	133275214	protein_coding	-8.23518	1.81982e-16	2.96631e-13	-5.04401	4.56885e-07	0.000504401	-3.19117	Korean_Neg_GTEx_Neg	0.446552	0.52755	0.424217	0.449283	0.248764	0.1771	0.071664	0.401208	0.253858	0.14735	Complete
metabolic	blood low density lipoprotein cholesterol	B_LDL	MED22	9	133338323	133348131	protein_coding	-5.98812	2.13197e-09	3.47511e-06	-5.59651	2.19437e-08	2.42259e-05	-0.391611	Korean_Neg_GTEx_Neg	0.0509047	0.292927	0.0807514	0.095659	0.335778	0.481845	-0.146067	0.308455	0.380806	-0.072351	Weak
metabolic	blood low density lipoprotein cholesterol	B_LDL	GDF7	2	20666664	20679245	protein_coding	4.17225	3.01934e-05	0.0492152	NA	NA	NA	NA	Korean_Pos	0.0682684	0.132583	4.79103e-06	0.057923	0.23259	0.249629	-0.0170386	0.354839	0.35045	0.00438931	No
metabolic	blood low density lipoprotein cholesterol	B_LDL	NSG1	4	4348140	4418967	protein_coding	4.94722	7.54362e-07	0.00122961	-1.3523	0.176283	1	6.29952	Korean_Pos	0.225179	0.447484	0.182718	0.362951	0.262176	0.243165	0.0190107	0.428704	0.370528	0.0581765	No
metabolic	blood total cholesterol	B_TCHL	IQGAP2	5	76403249	76708132	protein_coding	NA	NA	NA	-5.63598	1.74655e-08	1.92819e-05	NA	GTEx_Neg	0.0495886	0.159929	0.0695558	0.094018	0.346291	0.478125	-0.131834	0.396153	0.452002	-0.055849	Weak
metabolic	blood total cholesterol	B_TCHL	SCCPDH	1	246724047	246768137	protein_coding	-0.0520306	0.958504	1	-4.51222	6.42435e-06	0.00709249	4.46019	GTEx_Neg	0.0636424	0.0425547	0.0633301	0.106834	0.286474	0.264369	0.0221056	0.278456	0.208778	0.0696774	No
metabolic	blood total cholesterol	B_TCHL	SURF6	9	133328774	133336398	protein_coding	NA	NA	NA	-5.4028	6.57988e-08	7.26419e-05	NA	GTEx_Neg	0.0413864	0.377049	0.0559949	0.069453	0.284393	0.388859	-0.104466	0.431293	0.335452	0.0958412	No
metabolic	blood total cholesterol	B_TCHL	M6PR	12	8941468	8949955	protein_coding	NA	NA	NA	4.72318	2.32578e-06	0.00256766	NA	GTEx_Pos	0.0312509	0.0556407	0.067855	0.0621	0.250163	0.329797	-0.0796331	0.175325	0.166064	0.00926092	Complete
metabolic	blood total cholesterol	B_TCHL	NIPSNAP3A	9	104747688	104760122	protein_coding	-3.03363	0.0024171	1	5.24959	1.52827e-07	0.000168721	-8.28322	GTEx_Pos	0.180882	0.0921539	0.0803194	0.285842	0.232393	0.192812	0.039581	0.421894	0.303279	0.118615	Weak
metabolic	blood total cholesterol	B_TCHL	EFCAB13	17	47323290	47441312	protein_coding	-5.52475	3.30987e-08	5.39509e-05	-0.143686	0.885749	1	-5.38106	Korean_Neg	0.392643	0.0781583	0.287182	0.363149	0.250387	0.164758	0.0856283	0.421803	0.347628	0.0741757	Complete
metabolic	blood total cholesterol	B_TCHL	FADS2	11	61816256	61867354	protein_coding	-4.26401	2.01023e-05	0.0327667	-2.71599	0.0066093	1	-1.54802	Korean_Neg	0.0826164	0.606665	0.0718299	0.086314	0.473707	0.352886	0.120821	0.532941	0.390588	0.142353	Complete
metabolic	blood total cholesterol	B_TCHL	RHD	1	25272393	25330445	protein_coding	-4.24937	2.14617e-05	0.0349826	-3.05305	0.00226603	1	-1.19632	Korean_Neg	0.127734	0.647967	0.140755	0.000486	0.24324	0.260509	-0.0172684	0.27906	0.346421	-0.0673608	Weak
metabolic	blood total cholesterol	B_TCHL	ABO	9	133250401	133275214	protein_coding	-6.97914	2.99309e-12	4.87873e-09	-4.14769	3.36203e-05	0.0371168	-2.83146	Korean_Neg_GTEx_Neg	0.446552	0.52755	0.424217	0.449283	0.248764	0.1771	0.071664	0.401208	0.253858	0.14735	Complete
metabolic	blood total cholesterol	B_TCHL	MED22	9	133338323	133348131	protein_coding	-5.83416	5.42719e-09	8.84631e-06	-5.62074	1.90782e-08	2.10624e-05	-0.213423	Korean_Neg_GTEx_Neg	0.0509047	0.292927	0.0807514	0.095659	0.335778	0.481845	-0.146067	0.308455	0.380806	-0.072351	No
metabolic	blood total cholesterol	B_TCHL	GDF7	2	20666664	20679245	protein_coding	4.33118	1.48494e-05	0.0242045	NA	NA	NA	NA	Korean_Pos	0.0682684	0.132583	4.79103e-06	0.057923	0.23259	0.249629	-0.0170386	0.354839	0.35045	0.00438931	No
metabolic	blood total cholesterol	B_TCHL	LIPC	15	58410569	58569843	protein_coding	9.41438	4.88096e-21	7.95596e-18	NA	NA	NA	NA	Korean_Pos	0.315918	0.247661	0.0271406	0.429973	0.202994	0.153548	0.0494459	0.46336	0.416458	0.0469018	Complete
metabolic	blood total cholesterol	B_TCHL	NSG1	4	4348140	4418967	protein_coding	6.25172	4.0801e-10	6.65057e-07	-1.60616	0.108243	1	7.85788	Korean_Pos	0.225179	0.447484	0.182718	0.362951	0.262176	0.243165	0.0190107	0.428704	0.370528	0.0581765	No
metabolic	blood total cholesterol	B_TCHL	HLA-DOB	6	32812763	32817048	protein_coding	4.35915	1.3073e-05	0.021309	4.51895	6.22354e-06	0.00687079	-0.1598	Korean_Pos_GTEx_Pos	0.189138	0.518696	0.192147	0.160774	0.20519	0.221113	-0.0159237	0.403174	0.38125	0.0219247	No
metabolic	blood triglyceride	B_TG	SIDT2	11	117178733	117197445	protein_coding	-2.33054	0.0197802	1	-11.3	1.38324e-29	1.52709e-26	8.96942	GTEx_Neg	0.587247	0.262303	0.564298	0.43515	0.296116	0.519593	-0.223477	0.410759	0.379246	0.0315126	Complete
metabolic	blood triglyceride	B_TG	ZFP57	6	29672392	29681110	protein_coding	3.38085	0.000722964	1	-6.16336	7.15613e-10	7.90037e-07	9.54421	GTEx_Neg	0.411788	0.633202	0.382752	0.565657	0.200281	0.152373	0.047908	0.251651	0.331887	-0.0802355	No
metabolic	blood triglyceride	B_TG	RP11-1143G9.5	12	69326574	69331882	lincRNA	NA	NA	NA	4.46111	8.16482e-06	0.00901396	NA	GTEx_Pos	0.0229375	0.25344	0.0540607	0.080424	0.287466	0.343826	-0.0563609	0.383755	0.303645	0.0801098	No
metabolic	blood triglyceride	B_TG	GPR180	13	94601903	94634645	protein_coding	4.02904	5.60582e-05	0.0913749	4.11272	3.91423e-05	0.0432131	-0.083681	GTEx_Pos	0.129169	0.258041	0.140593	0.144052	0.318989	0.418756	-0.0997676	0.177347	0.163043	0.0143039	Complete
metabolic	blood triglyceride	B_TG	HLA-DQB1	6	32659467	32668383	protein_coding	1.55292	0.120445	1	4.45989	8.21125e-06	0.00906522	-2.90697	GTEx_Pos	0.556382	0.660168	0.45751	0.474161	0.323106	0.39818	-0.0750733	0.5622	0.407308	0.154892	Strong
metabolic	blood triglyceride	B_TG	SMG5	1	156249224	156282825	protein_coding	3.96619	7.30948e-05	0.119144	4.09494	4.22694e-05	0.0466654	-0.128751	GTEx_Pos	0.241179	0.643643	0.258069	0.217137	0.449336	0.472288	-0.0229518	0.373254	0.388751	-0.0154967	No
metabolic	blood triglyceride	B_TG	ABHD3	18	21650897	21704805	protein_coding	-4.97635	6.49305e-07	0.00105837	NA	NA	NA	NA	Korean_Neg	0.0762936	-0.00572656	0.00939182	0.056652	0.191125	0.138004	0.0531206	0.327879	0.209761	0.118117	Weak
metabolic	blood triglyceride	B_TG	GATAD2A	19	19385826	19508931	protein_coding	-7.19466	6.31673e-13	1.02963e-09	NA	NA	NA	NA	Korean_Neg	0.0929409	0.13285	0.0219609	0.102931	0.204664	0.177928	0.0267366	0.0917904	0.162708	-0.0709176	Complete
metabolic	blood triglyceride	B_TG	HLA-DPB1	6	33075926	33087201	protein_coding	-4.24896	2.15014e-05	0.0350473	NA	NA	NA	NA	Korean_Neg	0.652929	0.0206606	0.000500315	0.572784	0.380027	0.617852	-0.237825	0.327184	0.407594	-0.0804099	Weak
metabolic	blood triglyceride	B_TG	ICAM5	19	10289981	10296778	protein_coding	-4.17336	3.00463e-05	0.0489754	NA	NA	NA	NA	Korean_Neg	0.0955585	0.0203632	0.0386505	0.084099	0.346198	0.237227	0.108971	0.402605	0.322731	0.0798742	Strong
metabolic	blood triglyceride	B_TG	RBPMS2	15	64739892	64775587	protein_coding	-4.26229	2.02574e-05	0.0330195	NA	NA	NA	NA	Korean_Neg	0.161802	0.256388	0.0127386	0.539864	0.197957	0.313519	-0.115562	0.393335	0.330894	0.0624404	No
metabolic	blood triglyceride	B_TG	HLA-DRB5	6	32517343	32530287	protein_coding	-5.11649	3.12e-07	0.00050856	-7.15383	8.51192e-13	9.39715e-10	2.03734	Korean_Neg_GTEx_Neg	0.676084	0.649633	0.420478	0.703912	0.210809	0.244299	-0.0334904	0.339334	0.380292	-0.040958	Weak
metabolic	blood triglyceride	B_TG	RGS12	4	3314147	3439913	protein_coding	-4.99376	5.93406e-07	0.000967253	-4.89675	9.76259e-07	0.00107779	-0.097009	Korean_Neg_GTEx_Neg	0.0832874	0.046738	0.0788903	0.158491	0.348487	0.380434	-0.0319475	0.275802	0.223623	0.0521791	No
metabolic	blood triglyceride	B_TG	FADS2	11	61816256	61867354	protein_coding	8.13875	4.05116e-16	6.6034e-13	1.23772	0.215824	1	6.90103	Korean_Pos	0.0826164	0.606665	0.0718299	0.086314	0.473707	0.352886	0.120821	0.532941	0.390588	0.142353	Complete
metabolic	blood triglyceride	B_TG	HSD17B11	4	87336610	87391386	protein_coding	5.46424	4.66296e-08	7.60062e-05	0.900553	0.367829	1	4.56368	Korean_Pos	0.0797655	0.0838931	0.0632462	0.09404	0.311958	0.277318	0.0346395	0.49126	0.332353	0.158907	Strong
metabolic	blood triglyceride	B_TG	LIPC	15	58410569	58569843	protein_coding	7.46776	8.24072e-14	1.34324e-10	NA	NA	NA	NA	Korean_Pos	0.315918	0.247661	0.0271406	0.429973	0.202994	0.153548	0.0494459	0.46336	0.416458	0.0469018	Complete
metabolic	blood triglyceride	B_TG	MICA	6	31399784	31415315	protein_coding	7.51714	5.65748e-14	9.22169e-11	2.33507	0.0195424	1	5.18207	Korean_Pos	0.373262	0.352137	0.238996	0.392822	0.253819	0.233217	0.0206025	0.322138	0.288106	0.0340321	Weak
metabolic	blood triglyceride	B_TG	MYRF	11	61752649	61788518	protein_coding	6.09973	1.06735e-09	1.73977e-06	NA	NA	NA	NA	Korean_Pos	0.0554098	0.133607	0.0329705	0.065741	0.430281	0.317187	0.113094	0.184495	0.327209	-0.142714	Complete
metabolic	blood triglyceride	B_TG	NSG1	4	4348140	4418967	protein_coding	5.05153	4.39258e-07	0.00071599	-0.590186	0.555067	1	5.64172	Korean_Pos	0.225179	0.447484	0.182718	0.362951	0.262176	0.243165	0.0190107	0.428704	0.370528	0.0581765	No
metabolic	blood triglyceride	B_TG	PAQR6	1	156243322	156248117	protein_coding	4.23788	2.25898e-05	0.0368213	4.07746	4.55748e-05	0.0503146	0.160418	Korean_Pos	0.0793178	0.628948	0.090436	0.103386	0.265745	0.373019	-0.107274	0.301652	0.309193	-0.00754131	No
metabolic	blood triglyceride	B_TG	POU5F1	6	31164337	31180731	protein_coding	5.5928	2.24178e-08	3.6541e-05	NA	NA	NA	NA	Korean_Pos	0.057741	0.192914	0.00467539	0.114435	0.195879	0.241521	-0.0456423	0.335583	0.279544	0.0560385	Strong
metabolic	blood triglyceride	B_TG	DOCK7	1	62454298	62688368	protein_coding	8.8986	5.7715e-19	9.40754e-16	7.89469	2.94743e-15	3.25396e-12	1.00391	Korean_Pos_GTEx_Pos	0.0732837	0.0912172	0.0718326	0.101541	0.224087	0.32213	-0.0980434	0.352695	0.375576	-0.0228817	Complete
metabolic	blood triglyceride	B_TG	HLA-DOB	6	32812763	32817048	protein_coding	7.24563	4.34333e-13	7.07963e-10	7.62775	2.41548e-14	2.66668e-11	-0.382115	Korean_Pos_GTEx_Pos	0.189138	0.518696	0.192147	0.160774	0.20519	0.221113	-0.0159237	0.403174	0.38125	0.0219247	No
metabolic diseases	hyperlipidemia	B_LIP	ABO	9	133250401	133275214	protein_coding	-4.85523	1.01576e-06	0.00165569	-3.48355	0.000466108	0.514583	-1.37168	Korean_Neg	0.446552	0.52755	0.424217	0.449283	0.248764	0.1771	0.071664	0.401208	0.253858	0.14735	Complete
metabolic diseases	hyperlipidemia	B_LIP	GP6	19	55013705	55038264	protein_coding	-4.64315	2.87767e-06	0.0046906	NA	NA	NA	NA	Korean_Neg	0.0787273	NA	NA	0.107632	0.227482	0.249024	-0.0215423	NA	NA	NA	Strong
metabolic diseases	type 2 diabetes	B_DM	CRIPAK	4	1391552	1395989	protein_coding	0.752756	0.45124	1	-4.69658	2.5673e-06	0.0028343	5.44934	GTEx_Neg	0.110971	0.490214	0.0519327	0.138409	0.225942	0.275718	-0.0497761	0.247755	0.161117	0.0866373	No
metabolic diseases	type 2 diabetes	B_DM	UVSSA	4	1347266	1388049	protein_coding	0.267096	0.789304	1	-4.85003	1.25287e-06	0.00138317	5.11713	GTEx_Neg	0.118094	0.282961	0.0680554	0.119473	0.25265	0.323954	-0.071304	0.301208	0.341239	-0.0400307	Complete
metabolic diseases	type 2 diabetes	B_DM	MACF1	1	39081316	39487177	protein_coding	4.7632	2.07297e-06	0.00337895	NA	NA	NA	NA	Korean_Pos	0.0682353	NA	NA	0.099237	0.300904	0.297665	0.00323931	NA	NA	NA	Complete
metabolic diseases	type 2 diabetes	B_DM	CAMK1D	10	12349482	12835545	protein_coding	5.51419	3.35102e-08	5.46217e-05	5.24128	1.6044e-07	0.000177126	0.272916	Korean_Pos_GTEx_Pos	0.109249	0.103791	0.0793364	0.152155	0.335797	0.221737	0.11406	0.179691	0.210133	-0.0304423	Complete
musculoskeletal diseases	arthritis	B_ARTH	RBM44	2	237798745	237842807	protein_coding	-1.00695	0.314671	1	-4.86519	1.09377e-06	0.00120753	3.85823	GTEx_Neg	0.191534	0.194264	0.1879	0.233294	0.20635	0.172632	0.0337178	0.413188	0.392467	0.0207206	No
musculoskeletal diseases	fracture	B_FRAC	CD109	6	73695785	73828316	protein_coding	4.24108	2.79695e-05	0.0455903	NA	NA	NA	NA	Korean_Pos	0.439772	-0.0265953	0.0290345	0.653158	0.225798	0.246361	-0.0205633	0.25701	0.297034	-0.0400234	Weak
other diseases	allergic disease	B_ALLER	TUFM	16	28842411	28846408	protein_coding	-1.93324	0.0518662	1	-4.10991	3.28649e-05	0.0362829	2.17667	GTEx_Neg	0.300814	0.557254	0.190821	0.272037	0.247424	0.240272	0.00715175	0.717416	0.659866	0.05755	No

## Sheet: Table S8
Supplementary Table 8. Pathway enrichment analysis results (Only significant)
Model	Phenotype	Phenotype_Coding	Category	SubCategory	ID	pvalue	p.adjust
Korean	type 2 diabetes	B_DM	C5	GOBP	GOBP_ENDOSOMAL_LUMEN_ACIDIFICATION	0.000772519	0.0383388
Korean	type 2 diabetes	B_DM	C5	GOBP	GOBP_POSITIVE_REGULATION_OF_CELL_PROJECTION_ORGANIZATION	0.000912232	0.0383388
Korean	type 2 diabetes	B_DM	C5	GOBP	GOBP_ENDOCYTOSIS_INVOLVED_IN_VIRAL_ENTRY_INTO_HOST_CELL	0.00139025	0.0383388
Korean	type 2 diabetes	B_DM	C5	GOBP	GOBP_POSITIVE_REGULATION_OF_RESPIRATORY_BURST	0.00139025	0.0383388
Korean	type 2 diabetes	B_DM	C5	GOBP	GOBP_REGULATION_OF_NEURON_PROJECTION_DEVELOPMENT	0.00145364	0.0383388
Korean	type 2 diabetes	B_DM	C5	GOCC	GOCC_VACUOLAR_PROTON_TRANSPORTING_V_TYPE_ATPASE_V0_DOMAIN	0.00154464	0.0383388
Korean	type 2 diabetes	B_DM	C5	GOCC	GOCC_PROTON_TRANSPORTING_V_TYPE_ATPASE_V0_DOMAIN	0.00185338	0.0383388
Korean	type 2 diabetes	B_DM	C5	GOMF	GOMF_MICROTUBULE_MINUS_END_BINDING	0.00216205	0.0383388
Korean	type 2 diabetes	B_DM	C5	GOBP	GOBP_REGULATION_OF_NEURON_PROJECTION_ARBORIZATION	0.00231636	0.0383388
Korean	type 2 diabetes	B_DM	C5	GOBP	GOBP_REGULATION_OF_RESPIRATORY_BURST	0.00277921	0.0383388
Korean	type 2 diabetes	B_DM	C5	GOBP	GOBP_POSITIVE_REGULATION_OF_CREB_TRANSCRIPTION_FACTOR_ACTIVITY	0.00308769	0.0383388
Korean	type 2 diabetes	B_DM	C5	GOBP	GOBP_TRANSPORT_OF_VIRUS	0.00308769	0.0383388
Korean	type 2 diabetes	B_DM	C5	GOCC	GOCC_PROTON_TRANSPORTING_TWO_SECTOR_ATPASE_COMPLEX_PROTON_TRANSPORTING_DOMAIN	0.00401275	0.038804
Korean	type 2 diabetes	B_DM	C5	GOBP	GOBP_POSITIVE_REGULATION_OF_GRANULOCYTE_CHEMOTAXIS	0.00416688	0.038804
Korean	type 2 diabetes	B_DM	C5	GOCC	GOCC_PROTON_TRANSPORTING_V_TYPE_ATPASE_COMPLEX	0.00416688	0.038804
Korean	type 2 diabetes	B_DM	C5	GOMF	GOMF_CALMODULIN_DEPENDENT_PROTEIN_KINASE_ACTIVITY	0.00416688	0.038804
Korean	type 2 diabetes	B_DM	C5	GOBP	GOBP_NEURON_PROJECTION_ARBORIZATION	0.00462915	0.0399263
Korean	type 2 diabetes	B_DM	C5	GOBP	GOBP_POSITIVE_REGULATION_OF_NEUTROPHIL_MIGRATION	0.00493725	0.0399263
Korean	type 2 diabetes	B_DM	C5	GOBP	GOBP_REGULATION_OF_NEUTROPHIL_CHEMOTAXIS	0.00509127	0.0399263
Korean	type 2 diabetes	B_DM	C5	GOBP	GOBP_RESPIRATORY_BURST	0.00570722	0.0425188
Korean	type 2 diabetes	B_DM	C5	GOBP	GOBP_POSITIVE_REGULATION_OF_AXON_EXTENSION	0.0060151	0.0426786
Korean	type 2 diabetes	B_DM	C5	GOBP	GOBP_GOLGI_TO_PLASMA_MEMBRANE_PROTEIN_TRANSPORT	0.0064768	0.0438656
Korean	type 2 diabetes	B_DM	C5	GOBP	GOBP_REGULATION_OF_NEUTROPHIL_MIGRATION	0.00709217	0.0449854
Korean	type 2 diabetes	B_DM	C5	GOBP	GOBP_PH_REDUCTION	0.00724598	0.0449854
Korean	type 2 diabetes	B_DM	C5	GOCC	GOCC_PROTON_TRANSPORTING_TWO_SECTOR_ATPASE_COMPLEX	0.00770729	0.0450498
Korean	type 2 diabetes	B_DM	C5	GOBP	GOBP_REGULATION_OF_GRANULOCYTE_CHEMOTAXIS	0.00786103	0.0450498
Korean	type 2 diabetes	B_DM	C5	GOBP	GOBP_GOLGI_TO_PLASMA_MEMBRANE_TRANSPORT	0.00955113	0.0509045
Korean	type 2 diabetes	B_DM	C5	GOBP	GOBP_ESTABLISHMENT_OF_PROTEIN_LOCALIZATION_TO_PLASMA_MEMBRANE	0.00970468	0.0509045
Korean	type 2 diabetes	B_DM	C5	GOBP	GOBP_INTERMEDIATE_FILAMENT_BASED_PROCESS	0.0104722	0.0509045
Korean	type 2 diabetes	B_DM	C5	GOBP	GOBP_REGULATION_OF_CELL_SUBSTRATE_JUNCTION_ORGANIZATION	0.0104722	0.0509045
Korean	type 2 diabetes	B_DM	C5	GOMF	GOMF_ENDORIBONUCLEASE_ACTIVITY	0.0107791	0.0509045
Korean	type 2 diabetes	B_DM	C5	GOBP	GOBP_POSITIVE_REGULATION_OF_PHAGOCYTOSIS	0.0109325	0.0509045
Korean	type 2 diabetes	B_DM	C5	GOBP	GOBP_POSITIVE_REGULATION_OF_AXONOGENESIS	0.0118527	0.0511114
Korean	type 2 diabetes	B_DM	C5	GOBP	GOBP_RNA_PHOSPHODIESTER_BOND_HYDROLYSIS_ENDONUCLEOLYTIC	0.012006	0.0511114
Korean	type 2 diabetes	B_DM	C5	GOBP	GOBP_FOCAL_ADHESION_ASSEMBLY	0.0127724	0.0512825
Korean	type 2 diabetes	B_DM	C5	GOBP	GOBP_REGULATION_OF_CELLULAR_PH	0.0127724	0.0512825
Korean	type 2 diabetes	B_DM	C5	GOBP	GOBP_ENDOSOME_ORGANIZATION	0.0130788	0.0512825
Korean	type 2 diabetes	B_DM	C5	GOBP	GOBP_REGULATION_OF_PH	0.0143038	0.051523
Korean	type 2 diabetes	B_DM	C5	GOBP	GOBP_POSITIVE_REGULATION_OF_LEUKOCYTE_CHEMOTAXIS	0.0144569	0.051523
Korean	type 2 diabetes	B_DM	C5	GOBP	GOBP_CELL_SUBSTRATE_JUNCTION_ORGANIZATION	0.0150689	0.051523
Korean	type 2 diabetes	B_DM	C5	GOBP	GOBP_REGULATION_OF_DENDRITE_DEVELOPMENT	0.0150689	0.051523
Korean	type 2 diabetes	B_DM	C5	GOCC	GOCC_RUFFLE_MEMBRANE	0.0150689	0.051523
Korean	type 2 diabetes	B_DM	C5	GOBP	GOBP_REGULATION_OF_PHAGOCYTOSIS	0.0153749	0.051523
Korean	type 2 diabetes	B_DM	C5	GOBP	GOBP_NEUTROPHIL_CHEMOTAXIS	0.0161395	0.051523
Korean	type 2 diabetes	B_DM	C5	GOBP	GOBP_POST_GOLGI_VESICLE_MEDIATED_TRANSPORT	0.0162923	0.051523
Korean	type 2 diabetes	B_DM	C5	GOBP	GOBP_CELLULAR_MONOVALENT_INORGANIC_CATION_HOMEOSTASIS	0.0164452	0.051523
Korean	type 2 diabetes	B_DM	C5	GOBP	GOBP_REGULATION_OF_EXTENT_OF_CELL_GROWTH	0.016598	0.051523
Korean	type 2 diabetes	B_DM	C5	GOBP	GOBP_AXON_EXTENSION	0.0185835	0.0522868
Korean	type 2 diabetes	B_DM	C5	GOBP	GOBP_REGULATION_OF_CELL_MATRIX_ADHESION	0.0188887	0.0522868
Korean	type 2 diabetes	B_DM	C5	GOBP	GOBP_REGULATION_OF_LEUKOCYTE_CHEMOTAXIS	0.0190413	0.0522868
Korean	type 2 diabetes	B_DM	C5	GOMF	GOMF_ENDONUCLEASE_ACTIVITY	0.0190413	0.0522868
Korean	type 2 diabetes	B_DM	C5	GOMF	GOMF_RIBONUCLEASE_ACTIVITY	0.0190413	0.0522868
Korean	type 2 diabetes	B_DM	C5	GOBP	GOBP_GRANULOCYTE_CHEMOTAXIS	0.0194989	0.0522868
Korean	type 2 diabetes	B_DM	C5	GOBP	GOBP_NEUTROPHIL_MIGRATION	0.0196514	0.0522868
Korean	type 2 diabetes	B_DM	C5	GOBP	GOBP_POSITIVE_REGULATION_OF_CHEMOTAXIS	0.0214804	0.0525089
Korean	type 2 diabetes	B_DM	C5	GOBP	GOBP_VESICLE_MEDIATED_TRANSPORT_TO_THE_PLASMA_MEMBRANE	0.0214804	0.0525089
Korean	type 2 diabetes	B_DM	C5	GOBP	GOBP_POSITIVE_REGULATION_OF_LEUKOCYTE_MIGRATION	0.0216328	0.0525089
Korean	type 2 diabetes	B_DM	C5	GOBP	GOBP_POSITIVE_REGULATION_OF_WNT_SIGNALING_PATHWAY	0.0220896	0.0525089
Korean	type 2 diabetes	B_DM	C5	GOBP	GOBP_RNA_PHOSPHODIESTER_BOND_HYDROLYSIS	0.0225463	0.0525089
Korean	type 2 diabetes	B_DM	C5	GOBP	GOBP_POSITIVE_REGULATION_OF_NEURON_PROJECTION_DEVELOPMENT	0.0230029	0.0525089
Korean	type 2 diabetes	B_DM	C5	GOBP	GOBP_MONOVALENT_INORGANIC_CATION_HOMEOSTASIS	0.0234593	0.0525089
Korean	type 2 diabetes	B_DM	C5	GOBP	GOBP_PROTON_TRANSMEMBRANE_TRANSPORT	0.0234593	0.0525089
Korean	type 2 diabetes	B_DM	C5	GOBP	GOBP_ENTRY_INTO_HOST	0.0236114	0.0525089
Korean	type 2 diabetes	B_DM	C5	GOBP	GOBP_GRANULOCYTE_MIGRATION	0.0236114	0.0525089
Korean	type 2 diabetes	B_DM	C5	GOBP	GOBP_REGULATION_OF_AXONOGENESIS	0.0236114	0.0525089
Korean	type 2 diabetes	B_DM	C5	GOBP	GOBP_POSITIVE_REGULATION_OF_CELL_GROWTH	0.0249797	0.0539416
Korean	type 2 diabetes	B_DM	C5	GOBP	GOBP_POSITIVE_REGULATION_OF_DEVELOPMENTAL_GROWTH	0.0258911	0.0551111
Korean	type 2 diabetes	B_DM	C5	GOBP	GOBP_NEURON_PROJECTION_EXTENSION	0.0263467	0.0552909
Korean	type 2 diabetes	B_DM	C5	GOCC	GOCC_LEADING_EDGE_MEMBRANE	0.0269538	0.0554938
Korean	type 2 diabetes	B_DM	C5	GOCC	GOCC_RUFFLE	0.0272573	0.0554938
Korean	type 2 diabetes	B_DM	C5	GOBP	GOBP_REGULATION_OF_CELL_SIZE	0.0275607	0.0554938
Korean	type 2 diabetes	B_DM	C5	GOBP	GOBP_BIOLOGICAL_PROCESS_INVOLVED_IN_INTERACTION_WITH_HOST	0.0293799	0.058368
Korean	type 2 diabetes	B_DM	C5	GOMF	GOMF_CALMODULIN_BINDING	0.0305914	0.0594892
Korean	type 2 diabetes	B_DM	C5	GOBP	GOBP_REGULATION_OF_CELL_JUNCTION_ASSEMBLY	0.0307427	0.0594892
Korean	type 2 diabetes	B_DM	C5	GOMF	GOMF_NUCLEASE_ACTIVITY	0.0325579	0.0596508
Korean	type 2 diabetes	B_DM	C5	GOCC	GOCC_INTERMEDIATE_FILAMENT	0.0327091	0.0596508
Korean	type 2 diabetes	B_DM	C5	GOBP	GOBP_REGULATION_OF_CELL_SUBSTRATE_ADHESION	0.0331625	0.0596508
Korean	type 2 diabetes	B_DM	C5	GOMF	GOMF_ACTIN_FILAMENT_BINDING	0.0331625	0.0596508
Korean	type 2 diabetes	B_DM	C5	GOBP	GOBP_REGULATION_OF_LEUKOCYTE_MIGRATION	0.0334647	0.0596508
Korean	type 2 diabetes	B_DM	C5	GOBP	GOBP_POSITIVE_REGULATION_OF_NEUROGENESIS	0.0339178	0.0596508
Korean	type 2 diabetes	B_DM	C5	GOBP	GOBP_REGULATION_OF_CHEMOTAXIS	0.0343708	0.0596508
Korean	type 2 diabetes	B_DM	C5	GOBP	GOBP_DEVELOPMENTAL_CELL_GROWTH	0.0346728	0.0596508
Korean	type 2 diabetes	B_DM	C5	GOBP	GOBP_MYELOID_LEUKOCYTE_MIGRATION	0.0351255	0.0596508
Korean	type 2 diabetes	B_DM	C5	GOBP	GOBP_DENDRITE_DEVELOPMENT	0.0352764	0.0596508
Korean	type 2 diabetes	B_DM	C5	GOBP	GOBP_DEVELOPMENTAL_GROWTH_INVOLVED_IN_MORPHOGENESIS	0.035729	0.0596508
Korean	type 2 diabetes	B_DM	C5	GOBP	GOBP_CELL_MATRIX_ADHESION	0.0360307	0.0596508
Korean	type 2 diabetes	B_DM	C5	GOBP	GOBP_LEUKOCYTE_CHEMOTAXIS	0.0360307	0.0596508
Korean	type 2 diabetes	B_DM	C5	GOBP	GOBP_REGULATION_OF_MICROTUBULE_BASED_PROCESS	0.0379899	0.0611921
Korean	type 2 diabetes	B_DM	C5	GOBP	GOBP_RECEPTOR_MEDIATED_ENDOCYTOSIS	0.038291	0.0611921
Korean	type 2 diabetes	B_DM	C5	GOBP	GOBP_POSITIVE_REGULATION_OF_GROWTH	0.0390437	0.0611921
Korean	type 2 diabetes	B_DM	C5	GOCC	GOCC_INTERMEDIATE_FILAMENT_CYTOSKELETON	0.0390437	0.0611921
Korean	type 2 diabetes	B_DM	C5	GOBP	GOBP_ESTABLISHMENT_OF_PROTEIN_LOCALIZATION_TO_MEMBRANE	0.0394951	0.0611921
Korean	type 2 diabetes	B_DM	C5	GOBP	GOBP_NUCLEIC_ACID_PHOSPHODIESTER_BOND_HYDROLYSIS	0.0399464	0.0611921
Korean	type 2 diabetes	B_DM	C5	GOBP	GOBP_POSITIVE_REGULATION_OF_DNA_BINDING_TRANSCRIPTION_FACTOR_ACTIVITY	0.0402472	0.0611921
Korean	type 2 diabetes	B_DM	C5	GOBP	GOBP_POSITIVE_REGULATION_OF_NERVOUS_SYSTEM_DEVELOPMENT	0.0409988	0.061536
Korean	type 2 diabetes	B_DM	C5	GOMF	GOMF_MICROTUBULE_BINDING	0.0412994	0.061536
Korean	type 2 diabetes	B_DM	C5	GOBP	GOBP_PROTEIN_LOCALIZATION_TO_PLASMA_MEMBRANE	0.0434014	0.0638384
Korean	type 2 diabetes	B_DM	C5	GOBP	GOBP_BIOLOGICAL_PROCESS_INVOLVED_IN_SYMBIOTIC_INTERACTION	0.0437015	0.0638384
Korean	type 2 diabetes	B_DM	C5	GOBP	GOBP_REGULATION_OF_EPITHELIAL_CELL_MIGRATION	0.0443014	0.0640865
Korean	type 2 diabetes	B_DM	C5	GOBP	GOBP_POSITIVE_REGULATION_OF_CELL_DEVELOPMENT	0.0452008	0.0642201
Korean	type 2 diabetes	B_DM	C5	GOBP	GOBP_GOLGI_VESICLE_TRANSPORT	0.0458	0.0642201
Korean	type 2 diabetes	B_DM	C5	GOBP	GOBP_PHAGOCYTOSIS	0.0463991	0.0642201
Korean	type 2 diabetes	B_DM	C5	GOBP	GOBP_REGULATION_OF_CELL_MORPHOGENESIS	0.0463991	0.0642201
Korean	type 2 diabetes	B_DM	C5	GOBP	GOBP_VESICLE_ORGANIZATION	0.0465488	0.0642201
Korean	type 2 diabetes	B_DM	C5	GOBP	GOBP_CELL_CHEMOTAXIS	0.0478955	0.0654719
Korean	type 2 diabetes	B_DM	C5	GOBP	GOBP_VIRAL_LIFE_CYCLE	0.0483442	0.0654844
Korean	type 2 diabetes	B_DM	C5	GOBP	GOBP_REGULATION_OF_DEVELOPMENTAL_GROWTH	0.049988	0.0657509
Korean	type 2 diabetes	B_DM	C5	GOMF	GOMF_CADHERIN_BINDING	0.0507345	0.0657509
Korean	type 2 diabetes	B_DM	C5	GOBP	GOBP_REGULATION_OF_WNT_SIGNALING_PATHWAY	0.0511823	0.0657509
Korean	type 2 diabetes	B_DM	C5	GOBP	GOBP_PEPTIDYL_SERINE_MODIFICATION	0.0513315	0.0657509
Korean	type 2 diabetes	B_DM	C5	GOBP	GOBP_PROTEIN_LOCALIZATION_TO_CELL_PERIPHERY	0.0514807	0.0657509
Korean	type 2 diabetes	B_DM	C5	GOCC	GOCC_CELL_PROJECTION_MEMBRANE	0.0516299	0.0657509
Korean	type 2 diabetes	B_DM	C5	GOBP	GOBP_REGULATION_OF_CELLULAR_COMPONENT_SIZE	0.0531209	0.0670763
Korean	type 2 diabetes	B_DM	C5	GOMF	GOMF_PROTEIN_SERINE_KINASE_ACTIVITY	0.0546103	0.0679926
Korean	type 2 diabetes	B_DM	C5	GOBP	GOBP_REGULATION_OF_NEUROGENESIS	0.0547591	0.0679926
Korean	type 2 diabetes	B_DM	C5	GOBP	GOBP_CELL_SUBSTRATE_ADHESION	0.0553544	0.06815
Korean	type 2 diabetes	B_DM	C5	GOBP	GOBP_TISSUE_MIGRATION	0.0558007	0.06815
Korean	type 2 diabetes	B_DM	C5	GOMF	GOMF_TUBULIN_BINDING	0.0566929	0.0686767
Korean	type 2 diabetes	B_DM	C5	GOBP	GOBP_LEUKOCYTE_MIGRATION	0.058327	0.0697028
Korean	type 2 diabetes	B_DM	C5	GOMF	GOMF_CATALYTIC_ACTIVITY_ACTING_ON_RNA	0.059811	0.0707289
Korean	type 2 diabetes	B_DM	C5	GOBP	GOBP_VIRAL_PROCESS	0.0627742	0.0726776
Korean	type 2 diabetes	B_DM	C5	GOCC	GOCC_CELL_LEADING_EDGE	0.0629222	0.0726776
Korean	type 2 diabetes	B_DM	C5	GOBP	GOBP_CELL_JUNCTION_ASSEMBLY	0.063662	0.0729664
Korean	type 2 diabetes	B_DM	C5	GOBP	GOBP_WOUND_HEALING	0.0651403	0.0729849
Korean	type 2 diabetes	B_DM	C5	GOMF	GOMF_PROTEIN_SERINE_THREONINE_KINASE_ACTIVITY	0.0652881	0.0729849
Korean	type 2 diabetes	B_DM	C5	GOCC	GOCC_MICROTUBULE	0.0657312	0.0729849
Korean	type 2 diabetes	B_DM	C5	GOBP	GOBP_REGULATION_OF_NERVOUS_SYSTEM_DEVELOPMENT	0.0663219	0.0729849
Korean	type 2 diabetes	B_DM	C5	GOMF	GOMF_ACTIN_BINDING	0.0664695	0.0729849
Korean	type 2 diabetes	B_DM	C5	GOBP	GOBP_POSITIVE_REGULATION_OF_RESPONSE_TO_EXTERNAL_STIMULUS	0.0666171	0.0729849
Korean	type 2 diabetes	B_DM	C5	GOMF	GOMF_PROTEIN_SERINE_THREONINE_TYROSINE_KINASE_ACTIVITY	0.0673549	0.0730973
Korean	type 2 diabetes	B_DM	C5	GOBP	GOBP_REGULATION_OF_DNA_BINDING_TRANSCRIPTION_FACTOR_ACTIVITY	0.0680924	0.0730973
Korean	type 2 diabetes	B_DM	C5	GOCC	GOCC_VACUOLAR_MEMBRANE	0.0682398	0.0730973
Korean	type 2 diabetes	B_DM	C5	GOBP	GOBP_CELL_CELL_SIGNALING_BY_WNT	0.068682	0.0730973
Korean	type 2 diabetes	B_DM	C5	GOBP	GOBP_AXON_DEVELOPMENT	0.0722148	0.0743889
Korean	type 2 diabetes	B_DM	C5	GOBP	GOBP_AMEBOIDAL_TYPE_CELL_MIGRATION	0.0726557	0.0743889
Korean	type 2 diabetes	B_DM	C5	GOBP	GOBP_CELL_GROWTH	0.0733904	0.0743889
Korean	type 2 diabetes	B_DM	C5	GOBP	GOBP_REGULATION_OF_ANATOMICAL_STRUCTURE_SIZE	0.0733904	0.0743889
Korean	type 2 diabetes	B_DM	C5	GOCC	GOCC_ACTIN_CYTOSKELETON	0.0744182	0.074921
Korean	type 2 diabetes	B_DM	C5	GOBP	GOBP_REGULATION_OF_CELL_DEVELOPMENT	0.0752986	0.0752986
Korean	hypertension	B_HTN	C5	GOBP	GOBP_HORMONE_MEDIATED_SIGNALING_PATHWAY	2.179e-05	0.0344936
Korean	hypertension	B_HTN	C5	GOBP	GOBP_STEROID_HORMONE_MEDIATED_SIGNALING_PATHWAY	9.90695e-05	0.0559242
Korean	hypertension	B_HTN	C5	GOBP	GOBP_INTRACELLULAR_RECEPTOR_SIGNALING_PATHWAY	0.000105984	0.0559242
Korean	hyperlipidemia	B_LIP	C5	GOBP	GOBP_REGULATION_OF_ANTIGEN_PROCESSING_AND_PRESENTATION_OF_PEPTIDE_OR_POLYSACCHARIDE_ANTIGEN_VIA_MHC_CLASS_II	0.00154456	0.0366518
Korean	hyperlipidemia	B_LIP	C5	GOBP	GOBP_REGULATION_OF_ANTIGEN_PROCESSING_AND_PRESENTATION_OF_PEPTIDE_ANTIGEN	0.00185323	0.0366518
Korean	hyperlipidemia	B_LIP	C5	GOBP	GOBP_TENDON_DEVELOPMENT	0.00185323	0.0366518
Korean	hyperlipidemia	B_LIP	C5	GOBP	GOBP_TRIGLYCERIDE_RICH_LIPOPROTEIN_PARTICLE_CLEARANCE	0.00185323	0.0366518
Korean	hyperlipidemia	B_LIP	C5	GOBP	GOBP_NEGATIVE_REGULATION_OF_ANTIGEN_PROCESSING_AND_PRESENTATION	0.00277878	0.0366518
Korean	hyperlipidemia	B_LIP	C5	GOBP	GOBP_NEGATIVE_REGULATION_OF_NATURAL_KILLER_CELL_ACTIVATION	0.00277878	0.0366518
Korean	hyperlipidemia	B_LIP	C5	GOMF	GOMF_BETA_2_MICROGLOBULIN_BINDING	0.00277878	0.0366518
Korean	hyperlipidemia	B_LIP	C5	GOMF	GOMF_NATURAL_KILLER_CELL_LECTIN_LIKE_RECEPTOR_BINDING	0.00277878	0.0366518
Korean	hyperlipidemia	B_LIP	C5	GOBP	GOBP_POSITIVE_REGULATION_OF_PLATELET_AGGREGATION	0.00308713	0.0366518
Korean	hyperlipidemia	B_LIP	C5	GOCC	GOCC_TETRASPANIN_ENRICHED_MICRODOMAIN	0.00308713	0.0366518
Korean	hyperlipidemia	B_LIP	C5	GOMF	GOMF_LIPOPROTEIN_LIPASE_ACTIVITY	0.00308713	0.0366518
Korean	hyperlipidemia	B_LIP	C5	GOMF	GOMF_MHC_CLASS_II_RECEPTOR_ACTIVITY	0.00308713	0.0366518
Korean	hyperlipidemia	B_LIP	C5	GOBP	GOBP_POSITIVE_REGULATION_OF_CELL_CELL_ADHESION	0.00322792	0.0366518
Korean	hyperlipidemia	B_LIP	C5	GOMF	GOMF_PHOSPHATIDYL_PHOSPHOLIPASE_B_ACTIVITY	0.00339541	0.0366518
Korean	hyperlipidemia	B_LIP	C5	GOMF	GOMF_PHOSPHATIDYLSERINE_1_ACYLHYDROLASE_ACTIVITY	0.00339541	0.0366518
Korean	hyperlipidemia	B_LIP	C5	GOBP	GOBP_FOREBRAIN_MORPHOGENESIS	0.0037036	0.0366518
Korean	hyperlipidemia	B_LIP	C5	GOBP	GOBP_LIPID_GLYCOSYLATION	0.0037036	0.0366518
Korean	hyperlipidemia	B_LIP	C5	GOBP	GOBP_SPINAL_CORD_ASSOCIATION_NEURON_DIFFERENTIATION	0.0037036	0.0366518
Korean	hyperlipidemia	B_LIP	C5	GOBP	GOBP_TRIGLYCERIDE_RICH_LIPOPROTEIN_PARTICLE_REMODELING	0.0037036	0.0366518
Korean	hyperlipidemia	B_LIP	C5	GOBP	GOBP_POSITIVE_REGULATION_OF_HOMOTYPIC_CELL_CELL_ADHESION	0.00462772	0.0366518
Korean	hyperlipidemia	B_LIP	C5	GOBP	GOBP_LYMPHOCYTE_MEDIATED_IMMUNITY	0.00481709	0.0366518
Korean	hyperlipidemia	B_LIP	C5	GOBP	GOBP_HIGH_DENSITY_LIPOPROTEIN_PARTICLE_REMODELING	0.0049356	0.0366518
Korean	hyperlipidemia	B_LIP	C5	GOBP	GOBP_LOW_DENSITY_LIPOPROTEIN_PARTICLE_REMODELING	0.0049356	0.0366518
Korean	hyperlipidemia	B_LIP	C5	GOBP	GOBP_PEPTIDE_ANTIGEN_ASSEMBLY_WITH_MHC_CLASS_II_PROTEIN_COMPLEX	0.0049356	0.0366518
Korean	hyperlipidemia	B_LIP	C5	GOBP	GOBP_PHOSPHATIDYLCHOLINE_CATABOLIC_PROCESS	0.0049356	0.0366518
Korean	hyperlipidemia	B_LIP	C5	GOBP	GOBP_ADAPTIVE_IMMUNE_RESPONSE_BASED_ON_SOMATIC_RECOMBINATION_OF_IMMUNE_RECEPTORS_BUILT_FROM_IMMUNOGLOBULIN_SUPERFAMILY_DOMAINS	0.00497646	0.0366518
Korean	hyperlipidemia	B_LIP	C5	GOBP	GOBP_COLLAGEN_ACTIVATED_SIGNALING_PATHWAY	0.0052434	0.0366518
Korean	hyperlipidemia	B_LIP	C5	GOCC	GOCC_MHC_CLASS_II_PROTEIN_COMPLEX	0.0052434	0.0366518
Korean	hyperlipidemia	B_LIP	C5	GOMF	GOMF_PHOSPHOLIPASE_A1_ACTIVITY	0.0052434	0.0366518
Korean	hyperlipidemia	B_LIP	C5	GOMF	GOMF_APOLIPOPROTEIN_BINDING	0.00555112	0.0366518
Korean	hyperlipidemia	B_LIP	C5	GOMF	GOMF_LOW_DENSITY_LIPOPROTEIN_PARTICLE_BINDING	0.00555112	0.0366518
Korean	hyperlipidemia	B_LIP	C5	GOBP	GOBP_DORSAL_SPINAL_CORD_DEVELOPMENT	0.00616632	0.0366518
Korean	hyperlipidemia	B_LIP	C5	GOBP	GOBP_GAMMA_DELTA_T_CELL_ACTIVATION	0.00616632	0.0366518
Korean	hyperlipidemia	B_LIP	C5	GOBP	GOBP_NEGATIVE_REGULATION_OF_NATURAL_KILLER_CELL_MEDIATED_IMMUNITY	0.00616632	0.0366518
Korean	hyperlipidemia	B_LIP	C5	GOBP	GOBP_PEPTIDE_ANTIGEN_ASSEMBLY_WITH_MHC_PROTEIN_COMPLEX	0.00616632	0.0366518
Korean	hyperlipidemia	B_LIP	C5	GOBP	GOBP_REGULATION_OF_ANTIGEN_PROCESSING_AND_PRESENTATION	0.00616632	0.0366518
Korean	hyperlipidemia	B_LIP	C5	GOBP	GOBP_REVERSE_CHOLESTEROL_TRANSPORT	0.00616632	0.0366518
Korean	hyperlipidemia	B_LIP	C5	GOBP	GOBP_NEGATIVE_REGULATION_OF_IMMUNE_SYSTEM_PROCESS	0.00676597	0.0366518
Korean	hyperlipidemia	B_LIP	C5	GOBP	GOBP_MORPHOGENESIS_OF_AN_EPITHELIAL_FOLD	0.00708853	0.0366518
Korean	hyperlipidemia	B_LIP	C5	GOMF	GOMF_CATALYTIC_ACTIVITY_ACTING_ON_A_GLYCOPROTEIN	0.00708853	0.0366518
Korean	hyperlipidemia	B_LIP	C5	GOBP	GOBP_CYTOLYSIS	0.00739577	0.0366518
Korean	hyperlipidemia	B_LIP	C5	GOBP	GOBP_POSITIVE_REGULATION_OF_CELL_ADHESION	0.00743029	0.0366518
Korean	hyperlipidemia	B_LIP	C5	GOBP	GOBP_LEUKOCYTE_MEDIATED_IMMUNITY	0.00759274	0.0366518
Korean	hyperlipidemia	B_LIP	C5	GOBP	GOBP_IMMUNE_RESPONSE_TO_TUMOR_CELL	0.00770294	0.0366518
Korean	hyperlipidemia	B_LIP	C5	GOBP	GOBP_REGULATION_OF_CELL_CELL_ADHESION	0.00782293	0.0366518
Korean	hyperlipidemia	B_LIP	C5	GOCC	GOCC_MHC_PROTEIN_COMPLEX	0.00801002	0.0366518
Korean	hyperlipidemia	B_LIP	C5	GOMF	GOMF_LYSOPHOSPHOLIPASE_ACTIVITY	0.00801002	0.0366518
Korean	hyperlipidemia	B_LIP	C5	GOCC	GOCC_HIGH_DENSITY_LIPOPROTEIN_PARTICLE	0.00831703	0.0366518
Korean	hyperlipidemia	B_LIP	C5	GOMF	GOMF_MHC_CLASS_II_PROTEIN_COMPLEX_BINDING	0.00831703	0.0366518
Korean	hyperlipidemia	B_LIP	C5	GOMF	GOMF_TRIGLYCERIDE_LIPASE_ACTIVITY	0.00831703	0.0366518
Korean	hyperlipidemia	B_LIP	C5	GOBP	GOBP_NEGATIVE_REGULATION_OF_CELL_KILLING	0.00862396	0.0366518
Korean	hyperlipidemia	B_LIP	C5	GOBP	GOBP_REGULATION_OF_PLATELET_AGGREGATION	0.00862396	0.0366518
Korean	hyperlipidemia	B_LIP	C5	GOBP	GOBP_ANTIGEN_PROCESSING_AND_PRESENTATION_OF_EXOGENOUS_PEPTIDE_ANTIGEN_VIA_MHC_CLASS_II	0.00923757	0.038109
Korean	hyperlipidemia	B_LIP	C5	GOBP	GOBP_TRIGLYCERIDE_CATABOLIC_PROCESS	0.00954426	0.038109
Korean	hyperlipidemia	B_LIP	C5	GOMF	GOMF_PROTEIN_LIPID_COMPLEX_BINDING	0.00954426	0.038109
Korean	hyperlipidemia	B_LIP	C5	GOBP	GOBP_PROTEIN_CONTAINING_COMPLEX_REMODELING	0.0101574	0.038109
Korean	hyperlipidemia	B_LIP	C5	GOMF	GOMF_GALACTOSYLTRANSFERASE_ACTIVITY	0.0101574	0.038109
Korean	hyperlipidemia	B_LIP	C5	GOBP	GOBP_GLYCEROPHOSPHOLIPID_CATABOLIC_PROCESS	0.0104639	0.038109
Korean	hyperlipidemia	B_LIP	C5	GOMF	GOMF_ACETYLGALACTOSAMINYLTRANSFERASE_ACTIVITY	0.0104639	0.038109
Korean	hyperlipidemia	B_LIP	C5	GOBP	GOBP_REGULATION_OF_HOMOTYPIC_CELL_CELL_ADHESION	0.0107702	0.038109
Korean	hyperlipidemia	B_LIP	C5	GOBP	GOBP_ANTIGEN_PROCESSING_AND_PRESENTATION_OF_PEPTIDE_OR_POLYSACCHARIDE_ANTIGEN_VIA_MHC_CLASS_II	0.0110765	0.038109
Korean	hyperlipidemia	B_LIP	C5	GOBP	GOBP_BRAIN_MORPHOGENESIS	0.0110765	0.038109
Korean	hyperlipidemia	B_LIP	C5	GOMF	GOMF_MHC_PROTEIN_COMPLEX_BINDING	0.0110765	0.038109
Korean	hyperlipidemia	B_LIP	C5	GOBP	GOBP_ANTIGEN_PROCESSING_AND_PRESENTATION_OF_EXOGENOUS_PEPTIDE_ANTIGEN	0.0116889	0.038109
Korean	hyperlipidemia	B_LIP	C5	GOBP	GOBP_REGULATION_OF_NATURAL_KILLER_CELL_ACTIVATION	0.0116889	0.038109
Korean	hyperlipidemia	B_LIP	C5	GOCC	GOCC_PROTEIN_LIPID_COMPLEX	0.0119949	0.0385783
Korean	hyperlipidemia	B_LIP	C5	GOBP	GOBP_RESPONSE_TO_TUMOR_CELL	0.0123009	0.0390349
Korean	hyperlipidemia	B_LIP	C5	GOBP	GOBP_NEUTRAL_LIPID_CATABOLIC_PROCESS	0.0126068	0.0394001
Korean	hyperlipidemia	B_LIP	C5	GOBP	GOBP_ACYLGLYCEROL_HOMEOSTASIS	0.0129126	0.0394001
Korean	hyperlipidemia	B_LIP	C5	GOBP	GOBP_ANTIGEN_PROCESSING_AND_PRESENTATION_OF_EXOGENOUS_ANTIGEN	0.0144406	0.041532
Korean	hyperlipidemia	B_LIP	C5	GOBP	GOBP_ACTIVIN_RECEPTOR_SIGNALING_PATHWAY	0.0147459	0.041532
Korean	hyperlipidemia	B_LIP	C5	GOBP	GOBP_REGULATION_OF_PLATELET_ACTIVATION	0.0147459	0.041532
Korean	hyperlipidemia	B_LIP	C5	GOBP	GOBP_POSITIVE_REGULATION_OF_PATHWAY_RESTRICTED_SMAD_PROTEIN_PHOSPHORYLATION	0.0150512	0.041532
Korean	hyperlipidemia	B_LIP	C5	GOBP	GOBP_PROTEIN_LIPID_COMPLEX_SUBUNIT_ORGANIZATION	0.0150512	0.041532
Korean	hyperlipidemia	B_LIP	C5	GOBP	GOBP_REGULATION_OF_NATURAL_KILLER_CELL_MEDIATED_IMMUNITY	0.0153564	0.041532
Korean	hyperlipidemia	B_LIP	C5	GOBP	GOBP_T_CELL_MEDIATED_CYTOTOXICITY	0.0153564	0.041532
Korean	hyperlipidemia	B_LIP	C5	GOBP	GOBP_CELL_DIFFERENTIATION_IN_SPINAL_CORD	0.0156615	0.0418812
Korean	hyperlipidemia	B_LIP	C5	GOBP	GOBP_PHOSPHOLIPID_CATABOLIC_PROCESS	0.0162715	0.0420936
Korean	hyperlipidemia	B_LIP	C5	GOBP	GOBP_PLASMA_LIPOPROTEIN_PARTICLE_CLEARANCE	0.0162715	0.0420936
Korean	hyperlipidemia	B_LIP	C5	GOBP	GOBP_NEGATIVE_REGULATION_OF_LYMPHOCYTE_MEDIATED_IMMUNITY	0.0168811	0.0432012
Korean	hyperlipidemia	B_LIP	C5	GOBP	GOBP_ANTIGEN_PROCESSING_AND_PRESENTATION_OF_PEPTIDE_ANTIGEN	0.0193167	0.0478892
Korean	hyperlipidemia	B_LIP	C5	GOMF	GOMF_MANGANESE_ION_BINDING	0.0199248	0.0488876
Korean	hyperlipidemia	B_LIP	C5	GOBP	GOBP_PATHWAY_RESTRICTED_SMAD_PROTEIN_PHOSPHORYLATION	0.0202287	0.0490994
Korean	hyperlipidemia	B_LIP	C5	GOBP	GOBP_NEGATIVE_REGULATION_OF_LEUKOCYTE_MEDIATED_IMMUNITY	0.0205325	0.0490994
Korean	hyperlipidemia	B_LIP	C5	GOBP	GOBP_GLYCEROLIPID_CATABOLIC_PROCESS	0.0208363	0.0490994
Korean	hyperlipidemia	B_LIP	C5	GOMF	GOMF_COLLAGEN_BINDING	0.0208363	0.0490994
Korean	hyperlipidemia	B_LIP	C5	GOBP	GOBP_PLATELET_AGGREGATION	0.0214436	0.0495494
Korean	hyperlipidemia	B_LIP	C5	GOBP	GOBP_IMMUNOGLOBULIN_PRODUCTION_INVOLVED_IN_IMMUNOGLOBULIN_MEDIATED_IMMUNE_RESPONSE	0.022354	0.0506691
Korean	hyperlipidemia	B_LIP	C5	GOBP	GOBP_NEGATIVE_REGULATION_OF_INNATE_IMMUNE_RESPONSE	0.022354	0.0506691
Korean	hyperlipidemia	B_LIP	C5	GOBP	GOBP_PHOSPHATIDYLCHOLINE_METABOLIC_PROCESS	0.0226573	0.0508721
Korean	hyperlipidemia	B_LIP	C5	GOBP	GOBP_NATURAL_KILLER_CELL_MEDIATED_IMMUNITY	0.0232637	0.0517454
Korean	hyperlipidemia	B_LIP	C5	GOBP	GOBP_SMAD_PROTEIN_SIGNAL_TRANSDUCTION	0.025686	0.0547368
Korean	hyperlipidemia	B_LIP	C5	GOBP	GOBP_REGULATION_OF_LEUKOCYTE_MEDIATED_CYTOTOXICITY	0.0259885	0.0547368
Korean	hyperlipidemia	B_LIP	C5	GOBP	GOBP_REGULATION_OF_PLASMA_LIPOPROTEIN_PARTICLE_LEVELS	0.0259885	0.0547368
Korean	hyperlipidemia	B_LIP	C5	GOBP	GOBP_MIDBRAIN_DEVELOPMENT	0.0274995	0.0574112
Korean	hyperlipidemia	B_LIP	C5	GOBP	GOBP_POSITIVE_REGULATION_OF_NEURON_DIFFERENTIATION	0.0278015	0.057537
Korean	hyperlipidemia	B_LIP	C5	GOBP	GOBP_HOMOTYPIC_CELL_CELL_ADHESION	0.0281034	0.0576604
Korean	hyperlipidemia	B_LIP	C5	GOBP	GOBP_NATURAL_KILLER_CELL_ACTIVATION	0.0287069	0.0579004
Korean	hyperlipidemia	B_LIP	C5	GOCC	GOCC_GOLGI_CISTERNA_MEMBRANE	0.0287069	0.0579004
Korean	hyperlipidemia	B_LIP	C5	GOBP	GOBP_SPINAL_CORD_DEVELOPMENT	0.0302144	0.0589429
Korean	hyperlipidemia	B_LIP	C5	GOBP	GOBP_STEROL_HOMEOSTASIS	0.0302144	0.0589429
Korean	hyperlipidemia	B_LIP	C5	GOBP	GOBP_REGULATION_OF_CELL_KILLING	0.031419	0.0594438
Korean	hyperlipidemia	B_LIP	C5	GOBP	GOBP_TRIGLYCERIDE_METABOLIC_PROCESS	0.031419	0.0594438
Korean	hyperlipidemia	B_LIP	C5	GOMF	GOMF_PROTEIN_TYROSINE_KINASE_BINDING	0.031419	0.0594438
Korean	hyperlipidemia	B_LIP	C5	GOBP	GOBP_NEURAL_TUBE_FORMATION	0.03172	0.0594438
Korean	hyperlipidemia	B_LIP	C5	GOBP	GOBP_ANTIGEN_PROCESSING_AND_PRESENTATION	0.0326224	0.0601609
Korean	hyperlipidemia	B_LIP	C5	GOBP	GOBP_RESPONSE_TO_HEAT	0.0329231	0.0601609
Korean	hyperlipidemia	B_LIP	C5	GOMF	GOMF_PHOSPHOLIPASE_ACTIVITY	0.0335241	0.0601609
Korean	hyperlipidemia	B_LIP	C5	GOBP	GOBP_NEGATIVE_REGULATION_OF_IMMUNE_EFFECTOR_PROCESS	0.0341249	0.0601609
Korean	hyperlipidemia	B_LIP	C5	GOBP	GOBP_T_CELL_MEDIATED_IMMUNITY	0.0341249	0.0601609
Korean	hyperlipidemia	B_LIP	C5	GOBP	GOBP_NEGATIVE_REGULATION_OF_RESPONSE_TO_BIOTIC_STIMULUS	0.0344251	0.0602439
Korean	hyperlipidemia	B_LIP	C5	GOBP	GOBP_POSITIVE_REGULATION_OF_TRANSMEMBRANE_RECEPTOR_PROTEIN_SERINE_THREONINE_KINASE_SIGNALING_PATHWAY	0.0365247	0.0629919
Korean	hyperlipidemia	B_LIP	C5	GOCC	GOCC_GOLGI_CISTERNA	0.0365247	0.0629919
Korean	hyperlipidemia	B_LIP	C5	GOBP	GOBP_GLAND_MORPHOGENESIS	0.0374234	0.0640775
Korean	hyperlipidemia	B_LIP	C5	GOBP	GOBP_LEUKOCYTE_MEDIATED_CYTOTOXICITY	0.0395176	0.0667652
Korean	hyperlipidemia	B_LIP	C5	GOBP	GOBP_PLATELET_ACTIVATION	0.0398164	0.0667652
Korean	hyperlipidemia	B_LIP	C5	GOBP	GOBP_NEUTRAL_LIPID_METABOLIC_PROCESS	0.0401152	0.0667652
Korean	hyperlipidemia	B_LIP	C5	GOBP	GOBP_STEROL_TRANSPORT	0.0401152	0.0667652
Korean	hyperlipidemia	B_LIP	C5	GOMF	GOMF_LIPASE_ACTIVITY	0.0410111	0.0677822
Korean	hyperlipidemia	B_LIP	C5	GOBP	GOBP_EPITHELIAL_TUBE_FORMATION	0.0413096	0.0678047
Korean	hyperlipidemia	B_LIP	C5	GOMF	GOMF_UDP_GLYCOSYLTRANSFERASE_ACTIVITY	0.0439923	0.071653
Korean	hyperlipidemia	B_LIP	C5	GOMF	GOMF_IMMUNE_RECEPTOR_ACTIVITY	0.0448852	0.071653
Korean	hyperlipidemia	B_LIP	C5	GOBP	GOBP_MORPHOGENESIS_OF_EMBRYONIC_EPITHELIUM	0.0454801	0.071653
Korean	hyperlipidemia	B_LIP	C5	GOBP	GOBP_SECONDARY_ALCOHOL_METABOLIC_PROCESS	0.0454801	0.071653
Korean	hyperlipidemia	B_LIP	C5	GOMF	GOMF_CARBOXYLIC_ESTER_HYDROLASE_ACTIVITY	0.0454801	0.071653
Korean	hyperlipidemia	B_LIP	C5	GOBP	GOBP_TUBE_FORMATION	0.0460746	0.071653
Korean	hyperlipidemia	B_LIP	C5	GOBP	GOBP_BRANCHING_MORPHOGENESIS_OF_AN_EPITHELIAL_TUBE	0.0463718	0.071653
Korean	hyperlipidemia	B_LIP	C5	GOCC	GOCC_GOLGI_STACK	0.0463718	0.071653
Korean	hyperlipidemia	B_LIP	C5	GOBP	GOBP_NEURAL_TUBE_DEVELOPMENT	0.0466688	0.071653
Korean	hyperlipidemia	B_LIP	C5	GOBP	GOBP_STEROL_METABOLIC_PROCESS	0.0469658	0.071653
Korean	hyperlipidemia	B_LIP	C5	GOBP	GOBP_ORGANOPHOSPHATE_CATABOLIC_PROCESS	0.0478564	0.0725466
Korean	hyperlipidemia	B_LIP	C5	GOBP	GOBP_NEGATIVE_REGULATION_OF_LYMPHOCYTE_ACTIVATION	0.0487462	0.072951
Korean	hyperlipidemia	B_LIP	C5	GOBP	GOBP_FATTY_ACID_BIOSYNTHETIC_PROCESS	0.0490427	0.072951
Korean	hyperlipidemia	B_LIP	C5	GOMF	GOMF_GROWTH_FACTOR_ACTIVITY	0.0490427	0.072951
Korean	hyperlipidemia	B_LIP	C5	GOMF	GOMF_HEPARIN_BINDING	0.0508199	0.0750673
Korean	hyperlipidemia	B_LIP	C5	GOBP	GOBP_CENTRAL_NERVOUS_SYSTEM_NEURON_DIFFERENTIATION	0.0511158	0.0750673
Korean	hyperlipidemia	B_LIP	C5	GOMF	GOMF_ANTIGEN_BINDING	0.0514116	0.0750673
Korean	hyperlipidemia	B_LIP	C5	GOBP	GOBP_LIPID_HOMEOSTASIS	0.0522987	0.075437
Korean	hyperlipidemia	B_LIP	C5	GOBP	GOBP_RESPONSE_TO_BMP	0.0522987	0.075437
Korean	hyperlipidemia	B_LIP	C5	GOBP	GOBP_REGULATION_OF_LYMPHOCYTE_MEDIATED_IMMUNITY	0.0528897	0.0758299
Korean	hyperlipidemia	B_LIP	C5	GOBP	GOBP_NEGATIVE_REGULATION_OF_IMMUNE_RESPONSE	0.0540708	0.0766003
Korean	hyperlipidemia	B_LIP	C5	GOBP	GOBP_RESPONSE_TO_TEMPERATURE_STIMULUS	0.0540708	0.0766003
Korean	hyperlipidemia	B_LIP	C5	GOBP	GOBP_CELL_KILLING	0.0564293	0.0794685
Korean	hyperlipidemia	B_LIP	C5	GOBP	GOBP_REGULATION_OF_NEURON_DIFFERENTIATION	0.0579009	0.0810612
Korean	hyperlipidemia	B_LIP	C5	GOBP	GOBP_MORPHOGENESIS_OF_A_BRANCHING_STRUCTURE	0.0599579	0.082965
Korean	hyperlipidemia	B_LIP	C5	GOMF	GOMF_HEXOSYLTRANSFERASE_ACTIVITY	0.0608383	0.0836966
Korean	hyperlipidemia	B_LIP	C5	GOBP	GOBP_B_CELL_MEDIATED_IMMUNITY	0.0637681	0.087223
Korean	hyperlipidemia	B_LIP	C5	GOBP	GOBP_MONOCARBOXYLIC_ACID_BIOSYNTHETIC_PROCESS	0.0646455	0.0876084
Korean	hyperlipidemia	B_LIP	C5	GOBP	GOBP_NEGATIVE_REGULATION_OF_CELL_ACTIVATION	0.0649378	0.0876084
Korean	hyperlipidemia	B_LIP	C5	GOBP	GOBP_LIPID_MODIFICATION	0.0652301	0.0876084
Korean	hyperlipidemia	B_LIP	C5	GOBP	GOBP_IMMUNOGLOBULIN_PRODUCTION	0.0655223	0.0876084
Korean	hyperlipidemia	B_LIP	C5	GOBP	GOBP_CELLULAR_LIPID_CATABOLIC_PROCESS	0.0661064	0.0878956
Korean	hyperlipidemia	B_LIP	C5	GOBP	GOBP_HEMOSTASIS	0.0684398	0.0899927
Korean	hyperlipidemia	B_LIP	C5	GOBP	GOBP_REGULATION_OF_INNATE_IMMUNE_RESPONSE	0.0690224	0.0902601
Korean	hyperlipidemia	B_LIP	C5	GOMF	GOMF_CYTOKINE_ACTIVITY	0.0701867	0.0909252
Korean	hyperlipidemia	B_LIP	C5	GOBP	GOBP_NEURON_PROJECTION_GUIDANCE	0.0704776	0.0909252
Korean	hyperlipidemia	B_LIP	C5	GOMF	GOMF_GLYCOSAMINOGLYCAN_BINDING	0.0707684	0.0909252
Korean	hyperlipidemia	B_LIP	C5	GOBP	GOBP_REGULATION_OF_LEUKOCYTE_MEDIATED_IMMUNITY	0.0710592	0.0909252
Korean	hyperlipidemia	B_LIP	C5	GOBP	GOBP_POSITIVE_REGULATION_OF_LEUKOCYTE_CELL_CELL_ADHESION	0.0733823	0.0933957
Korean	hyperlipidemia	B_LIP	C5	GOBP	GOBP_GLYCOSYLATION	0.0739623	0.0936332
Korean	hyperlipidemia	B_LIP	C5	GOBP	GOBP_CONNECTIVE_TISSUE_DEVELOPMENT	0.0780141	0.0970396
Korean	hyperlipidemia	B_LIP	C5	GOBP	GOBP_CELL_FATE_COMMITMENT	0.0794575	0.0970396
Korean	hyperlipidemia	B_LIP	C5	GOBP	GOBP_NEGATIVE_REGULATION_OF_DEFENSE_RESPONSE	0.0800344	0.0970396
Korean	hyperlipidemia	B_LIP	C5	GOBP	GOBP_REGULATION_OF_TRANSMEMBRANE_RECEPTOR_PROTEIN_SERINE_THREONINE_KINASE_SIGNALING_PATHWAY	0.0803227	0.0970396
Korean	hyperlipidemia	B_LIP	C5	GOMF	GOMF_SULFUR_COMPOUND_BINDING	0.0803227	0.0970396
Korean	thyroid disease	B_THY	C5	GOBP	GOBP_NEGATIVE_REGULATION_OF_DNA_DAMAGE_CHECKPOINT	0.00102992	0.0295913
Korean	thyroid disease	B_THY	C5	GOBP	GOBP_REGULATION_OF_CD4_POSITIVE_CD25_POSITIVE_ALPHA_BETA_REGULATORY_T_CELL_DIFFERENTIATION	0.00102992	0.0295913
Korean	thyroid disease	B_THY	C5	GOBP	GOBP_CD4_POSITIVE_CD25_POSITIVE_ALPHA_BETA_REGULATORY_T_CELL_DIFFERENTIATION	0.00164749	0.0295913
Korean	thyroid disease	B_THY	C5	GOBP	GOBP_NEGATIVE_REGULATION_OF_CELL_CYCLE_CHECKPOINT	0.00164749	0.0295913
Korean	thyroid disease	B_THY	C5	GOBP	GOBP_RNA_SECONDARY_STRUCTURE_UNWINDING	0.00164749	0.0295913
Korean	thyroid disease	B_THY	C5	GOMF	GOMF_ATP_DEPENDENT_PROTEIN_BINDING	0.00164749	0.0295913
Korean	thyroid disease	B_THY	C5	GOBP	GOBP_POSITIVE_REGULATION_OF_MEMORY_T_CELL_DIFFERENTIATION	0.00185328	0.0295913
Korean	thyroid disease	B_THY	C5	GOBP	GOBP_TRANSLOCATION_OF_MOLECULES_INTO_HOST	0.00185328	0.0295913
Korean	thyroid disease	B_THY	C5	GOMF	GOMF_U4_SNRNA_BINDING	0.00185328	0.0295913
Korean	thyroid disease	B_THY	C5	GOCC	GOCC_TRANSCRIPTION_EXPORT_COMPLEX	0.00205904	0.0295913
Korean	thyroid disease	B_THY	C5	GOMF	GOMF_MHC_CLASS_II_RECEPTOR_ACTIVITY	0.00205904	0.0295913
Korean	thyroid disease	B_THY	C5	GOMF	GOMF_T_CELL_RECEPTOR_BINDING	0.00205904	0.0295913
Korean	thyroid disease	B_THY	C5	GOCC	GOCC_U6_SNRNP	0.00226477	0.0295913
Korean	thyroid disease	B_THY	C5	GOCC	GOCC_U4_SNRNP	0.00267613	0.0295913
Korean	thyroid disease	B_THY	C5	GOBP	GOBP_IMMUNOLOGICAL_MEMORY_FORMATION_PROCESS	0.00288177	0.0295913
Korean	thyroid disease	B_THY	C5	GOBP	GOBP_DENDRITIC_CELL_ANTIGEN_PROCESSING_AND_PRESENTATION	0.00308737	0.0295913
Korean	thyroid disease	B_THY	C5	GOMF	GOMF_INTRAMOLECULAR_OXIDOREDUCTASE_ACTIVITY_TRANSPOSING_C_C_BONDS	0.00308737	0.0295913
Korean	thyroid disease	B_THY	C5	GOBP	GOBP_PEPTIDE_ANTIGEN_ASSEMBLY_WITH_MHC_CLASS_II_PROTEIN_COMPLEX	0.00329294	0.0295913
Korean	thyroid disease	B_THY	C5	GOBP	GOBP_REGULATION_OF_DNA_DAMAGE_CHECKPOINT	0.00329294	0.0295913
Korean	thyroid disease	B_THY	C5	GOMF	GOMF_U6_SNRNA_BINDING	0.00329294	0.0295913
Korean	thyroid disease	B_THY	C5	GOBP	GOBP_IMMUNOLOGICAL_MEMORY_PROCESS	0.00349848	0.0295913
Korean	thyroid disease	B_THY	C5	GOCC	GOCC_MHC_CLASS_II_PROTEIN_COMPLEX	0.00349848	0.0295913
Korean	thyroid disease	B_THY	C5	GOBP	GOBP_ANTIGEN_PROCESSING_AND_PRESENTATION_OF_ENDOGENOUS_PEPTIDE_ANTIGEN	0.00390946	0.030938
Korean	thyroid disease	B_THY	C5	GOBP	GOBP_PEPTIDE_ANTIGEN_ASSEMBLY_WITH_MHC_PROTEIN_COMPLEX	0.0041149	0.030938
Korean	thyroid disease	B_THY	C5	GOBP	GOBP_POSITIVE_REGULATION_OF_REGULATORY_T_CELL_DIFFERENTIATION	0.0041149	0.030938
Korean	thyroid disease	B_THY	C5	GOMF	GOMF_POLYSACCHARIDE_BINDING	0.00514164	0.0347783
Korean	thyroid disease	B_THY	C5	GOBP	GOBP_ANTIGEN_PROCESSING_AND_PRESENTATION_OF_ENDOGENOUS_ANTIGEN	0.00534689	0.0347783
Korean	thyroid disease	B_THY	C5	GOCC	GOCC_MHC_PROTEIN_COMPLEX	0.00534689	0.0347783
Korean	thyroid disease	B_THY	C5	GOBP	GOBP_POSITIVE_REGULATION_OF_CYTOKINE_PRODUCTION_INVOLVED_IN_INFLAMMATORY_RESPONSE	0.00555211	0.0347783
Korean	thyroid disease	B_THY	C5	GOMF	GOMF_MHC_CLASS_II_PROTEIN_COMPLEX_BINDING	0.00555211	0.0347783
Korean	thyroid disease	B_THY	C5	GOCC	GOCC_LUMENAL_SIDE_OF_ENDOPLASMIC_RETICULUM_MEMBRANE	0.00596246	0.0347783
Korean	thyroid disease	B_THY	C5	GOBP	GOBP_ANTIGEN_PROCESSING_AND_PRESENTATION_OF_EXOGENOUS_PEPTIDE_ANTIGEN_VIA_MHC_CLASS_II	0.00616759	0.0347783
Korean	thyroid disease	B_THY	C5	GOBP	GOBP_POSITIVE_REGULATION_OF_DNA_TEMPLATED_TRANSCRIPTION_ELONGATION	0.00616759	0.0347783
Korean	thyroid disease	B_THY	C5	GOBP	GOBP_POSITIVE_REGULATION_OF_T_CELL_MEDIATED_CYTOTOXICITY	0.00616759	0.0347783
Korean	thyroid disease	B_THY	C5	GOBP	GOBP_POSITIVE_REGULATION_OF_CD4_POSITIVE_ALPHA_BETA_T_CELL_DIFFERENTIATION	0.00657774	0.0353586
Korean	thyroid disease	B_THY	C5	GOBP	GOBP_REGULATION_OF_CELL_CYCLE_CHECKPOINT	0.00698777	0.0353586
Korean	thyroid disease	B_THY	C5	GOCC	GOCC_LUMENAL_SIDE_OF_MEMBRANE	0.00719274	0.0353586
Korean	thyroid disease	B_THY	C5	GOBP	GOBP_ANTIGEN_PROCESSING_AND_PRESENTATION_OF_PEPTIDE_OR_POLYSACCHARIDE_ANTIGEN_VIA_MHC_CLASS_II	0.00739767	0.0353586
Korean	thyroid disease	B_THY	C5	GOBP	GOBP_REGULATORY_T_CELL_DIFFERENTIATION	0.00739767	0.0353586
Korean	thyroid disease	B_THY	C5	GOMF	GOMF_MHC_PROTEIN_COMPLEX_BINDING	0.00739767	0.0353586
Korean	thyroid disease	B_THY	C5	GOBP	GOBP_ANTIGEN_PROCESSING_AND_PRESENTATION_OF_EXOGENOUS_PEPTIDE_ANTIGEN	0.00780745	0.0353586
Korean	thyroid disease	B_THY	C5	GOBP	GOBP_REGULATION_OF_T_HELPER_CELL_DIFFERENTIATION	0.00780745	0.0353586
Korean	thyroid disease	B_THY	C5	GOBP	GOBP_POSITIVE_REGULATION_OF_CD4_POSITIVE_ALPHA_BETA_T_CELL_ACTIVATION	0.00801229	0.0353586
Korean	thyroid disease	B_THY	C5	GOMF	GOMF_PEPTIDE_ANTIGEN_BINDING	0.00801229	0.0353586
Korean	thyroid disease	B_THY	C5	GOBP	GOBP_REGULATION_OF_T_CELL_MEDIATED_CYTOTOXICITY	0.00821709	0.0354909
Korean	thyroid disease	B_THY	C5	GOCC	GOCC_IMMUNOLOGICAL_SYNAPSE	0.00903601	0.0382148
Korean	thyroid disease	B_THY	C5	GOBP	GOBP_ANTIGEN_PROCESSING_AND_PRESENTATION_OF_EXOGENOUS_ANTIGEN	0.00964986	0.0385829
Korean	thyroid disease	B_THY	C5	GOBP	GOBP_POSITIVE_REGULATION_OF_ALPHA_BETA_T_CELL_DIFFERENTIATION	0.0102634	0.0385829
Korean	thyroid disease	B_THY	C5	GOBP	GOBP_REGULATION_OF_CD4_POSITIVE_ALPHA_BETA_T_CELL_DIFFERENTIATION	0.0102634	0.0385829
Korean	thyroid disease	B_THY	C5	GOBP	GOBP_T_CELL_MEDIATED_CYTOTOXICITY	0.0102634	0.0385829
Korean	thyroid disease	B_THY	C5	GOMF	GOMF_INTRAMOLECULAR_OXIDOREDUCTASE_ACTIVITY	0.0108767	0.040145
Korean	thyroid disease	B_THY	C5	GOMF	GOMF_SNRNA_BINDING	0.0110811	0.0401689
Korean	thyroid disease	B_THY	C5	GOBP	GOBP_REGULATION_OF_DNA_TEMPLATED_TRANSCRIPTION_ELONGATION	0.011694	0.041647
Korean	thyroid disease	B_THY	C5	GOBP	GOBP_POSITIVE_REGULATION_OF_T_CELL_MEDIATED_IMMUNITY	0.0121024	0.0423585
Korean	thyroid disease	B_THY	C5	GOBP	GOBP_MRNA_EXPORT_FROM_NUCLEUS	0.0127149	0.0428953
Korean	thyroid disease	B_THY	C5	GOCC	GOCC_ER_TO_GOLGI_TRANSPORT_VESICLE_MEMBRANE	0.0127149	0.0428953
Korean	thyroid disease	B_THY	C5	GOBP	GOBP_ANTIGEN_PROCESSING_AND_PRESENTATION_OF_PEPTIDE_ANTIGEN	0.0129189	0.0428953
Korean	thyroid disease	B_THY	C5	GOBP	GOBP_POSITIVE_REGULATION_OF_CELL_KILLING	0.013327	0.0428953
Korean	thyroid disease	B_THY	C5	GOBP	GOBP_REGULATION_OF_CD4_POSITIVE_ALPHA_BETA_T_CELL_ACTIVATION	0.013531	0.0428953
Korean	thyroid disease	B_THY	C5	GOBP	GOBP_REGULATION_OF_ALPHA_BETA_T_CELL_DIFFERENTIATION	0.0137349	0.0428953
Korean	thyroid disease	B_THY	C5	GOBP	GOBP_POSITIVE_REGULATION_OF_ALPHA_BETA_T_CELL_ACTIVATION	0.0141427	0.0434997
Korean	thyroid disease	B_THY	C5	GOCC	GOCC_CLATHRIN_COATED_ENDOCYTIC_VESICLE_MEMBRANE	0.0147542	0.044654
Korean	thyroid disease	B_THY	C5	GOBP	GOBP_IMMUNOGLOBULIN_PRODUCTION_INVOLVED_IN_IMMUNOGLOBULIN_MEDIATED_IMMUNE_RESPONSE	0.014958	0.044654
Korean	thyroid disease	B_THY	C5	GOBP	GOBP_CYTOKINE_PRODUCTION_INVOLVED_IN_INFLAMMATORY_RESPONSE	0.0153654	0.0450967
Korean	thyroid disease	B_THY	C5	GOBP	GOBP_T_CELL_DIFFERENTIATION_INVOLVED_IN_IMMUNE_RESPONSE	0.0155691	0.0450967
Korean	thyroid disease	B_THY	C5	GOBP	GOBP_SPLICEOSOMAL_COMPLEX_ASSEMBLY	0.0157727	0.0450967
Korean	thyroid disease	B_THY	C5	GOMF	GOMF_ATP_DEPENDENT_ACTIVITY_ACTING_ON_RNA	0.0161799	0.0456183
Korean	thyroid disease	B_THY	C5	GOBP	GOBP_CD4_POSITIVE_ALPHA_BETA_T_CELL_DIFFERENTIATION	0.0167904	0.0458745
Korean	thyroid disease	B_THY	C5	GOBP	GOBP_NEGATIVE_REGULATION_OF_RESPONSE_TO_DNA_DAMAGE_STIMULUS	0.0167904	0.0458745
Korean	thyroid disease	B_THY	C5	GOBP	GOBP_DNA_TEMPLATED_TRANSCRIPTION_ELONGATION	0.0169939	0.0458745
Korean	thyroid disease	B_THY	C5	GOBP	GOBP_REGULATION_OF_LEUKOCYTE_MEDIATED_CYTOTOXICITY	0.0174007	0.0458745
Korean	thyroid disease	B_THY	C5	GOBP	GOBP_RNA_EXPORT_FROM_NUCLEUS	0.0174007	0.0458745
Korean	thyroid disease	B_THY	C5	GOBP	GOBP_REGULATION_OF_T_CELL_MEDIATED_IMMUNITY	0.0180106	0.0462805
Korean	thyroid disease	B_THY	C5	GOCC	GOCC_SPLICEOSOMAL_SNRNP_COMPLEX	0.0180106	0.0462805
Korean	thyroid disease	B_THY	C5	GOCC	GOCC_CLATHRIN_COATED_ENDOCYTIC_VESICLE	0.0186203	0.0472491
Korean	thyroid disease	B_THY	C5	GOBP	GOBP_POSITIVE_REGULATION_OF_LEUKOCYTE_CHEMOTAXIS	0.0192297	0.0476053
Korean	thyroid disease	B_THY	C5	GOCC	GOCC_COPII_COATED_ER_TO_GOLGI_TRANSPORT_VESICLE	0.0192297	0.0476053
Korean	thyroid disease	B_THY	C5	GOBP	GOBP_PRODUCTION_OF_MOLECULAR_MEDIATOR_INVOLVED_IN_INFLAMMATORY_RESPONSE	0.0204477	0.0494113
Korean	thyroid disease	B_THY	C5	GOCC	GOCC_TRANS_GOLGI_NETWORK_MEMBRANE	0.0204477	0.0494113
Korean	thyroid disease	B_THY	C5	GOBP	GOBP_CD4_POSITIVE_ALPHA_BETA_T_CELL_ACTIVATION	0.0208534	0.0494113
Korean	thyroid disease	B_THY	C5	GOBP	GOBP_REGULATION_OF_CELL_KILLING	0.0210562	0.0494113
Korean	thyroid disease	B_THY	C5	GOBP	GOBP_REGULATION_OF_ALPHA_BETA_T_CELL_ACTIVATION	0.0214617	0.0494113
Korean	thyroid disease	B_THY	C5	GOBP	GOBP_ANTIGEN_PROCESSING_AND_PRESENTATION	0.0218671	0.0494113
Korean	thyroid disease	B_THY	C5	GOBP	GOBP_POSITIVE_REGULATION_OF_LYMPHOCYTE_DIFFERENTIATION	0.0218671	0.0494113
Korean	thyroid disease	B_THY	C5	GOCC	GOCC_SM_LIKE_PROTEIN_FAMILY_COMPLEX	0.0222724	0.0494113
Korean	thyroid disease	B_THY	C5	GOBP	GOBP_ALPHA_BETA_T_CELL_DIFFERENTIATION	0.0226776	0.0494113
Korean	thyroid disease	B_THY	C5	GOCC	GOCC_CLATHRIN_COATED_VESICLE_MEMBRANE	0.0226776	0.0494113
Korean	thyroid disease	B_THY	C5	GOBP	GOBP_T_CELL_MEDIATED_IMMUNITY	0.0228801	0.0494113
Korean	thyroid disease	B_THY	C5	GOBP	GOBP_POSITIVE_REGULATION_OF_ADAPTIVE_IMMUNE_RESPONSE	0.0234875	0.0500015
Korean	thyroid disease	B_THY	C5	GOBP	GOBP_T_CELL_ACTIVATION_INVOLVED_IN_IMMUNE_RESPONSE	0.0236899	0.0500015
Korean	thyroid disease	B_THY	C5	GOBP	GOBP_POSITIVE_REGULATION_OF_LYMPHOCYTE_MEDIATED_IMMUNITY	0.0238923	0.0500015
Korean	thyroid disease	B_THY	C5	GOBP	GOBP_DNA_INTEGRITY_CHECKPOINT_SIGNALING	0.0251059	0.0507703
Korean	thyroid disease	B_THY	C5	GOBP	GOBP_POSITIVE_REGULATION_OF_CELL_CYCLE_PHASE_TRANSITION	0.0251059	0.0507703
Korean	thyroid disease	B_THY	C5	GOBP	GOBP_REGULATION_OF_LEUKOCYTE_CHEMOTAXIS	0.0253081	0.0507703
Korean	thyroid disease	B_THY	C5	GOBP	GOBP_MRNA_TRANSPORT	0.0255102	0.0507703
Korean	thyroid disease	B_THY	C5	GOBP	GOBP_LEUKOCYTE_MEDIATED_CYTOTOXICITY	0.0265203	0.0522682
Korean	thyroid disease	B_THY	C5	GOBP	GOBP_POSITIVE_REGULATION_OF_LEUKOCYTE_MEDIATED_IMMUNITY	0.0283366	0.0550396
Korean	thyroid disease	B_THY	C5	GOBP	GOBP_POSITIVE_REGULATION_OF_CHEMOTAXIS	0.0285383	0.0550396
Korean	thyroid disease	B_THY	C5	GOBP	GOBP_POSITIVE_REGULATION_OF_LEUKOCYTE_MIGRATION	0.0287399	0.0550396
Korean	thyroid disease	B_THY	C5	GOBP	GOBP_POSITIVE_REGULATION_OF_INFLAMMATORY_RESPONSE	0.0295461	0.0560547
Korean	thyroid disease	B_THY	C5	GOMF	GOMF_IMMUNE_RECEPTOR_ACTIVITY	0.0301504	0.0566715
Korean	thyroid disease	B_THY	C5	GOBP	GOBP_REGULATION_OF_T_CELL_DIFFERENTIATION	0.0307544	0.0571273
Korean	thyroid disease	B_THY	C5	GOCC	GOCC_LATE_ENDOSOME_MEMBRANE	0.0309557	0.0571273
Korean	thyroid disease	B_THY	C5	GOBP	GOBP_STEROL_METABOLIC_PROCESS	0.0315593	0.057129
Korean	thyroid disease	B_THY	C5	GOBP	GOBP_NUCLEAR_EXPORT	0.0317605	0.057129
Korean	thyroid disease	B_THY	C5	GOMF	GOMF_HELICASE_ACTIVITY	0.0319616	0.057129
Korean	thyroid disease	B_THY	C5	GOBP	GOBP_ALPHA_BETA_T_CELL_ACTIVATION	0.0321627	0.057129
Korean	thyroid disease	B_THY	C5	GOBP	GOBP_POSITIVE_REGULATION_OF_HEMOPOIESIS	0.0323637	0.057129
Korean	thyroid disease	B_THY	C5	GOBP	GOBP_ESTABLISHMENT_OF_RNA_LOCALIZATION	0.0327657	0.05734
Korean	thyroid disease	B_THY	C5	GOMF	GOMF_ISOMERASE_ACTIVITY	0.0335694	0.0582443
Korean	thyroid disease	B_THY	C5	GOBP	GOBP_CELL_CYCLE_CHECKPOINT_SIGNALING	0.0345733	0.0585702
Korean	thyroid disease	B_THY	C5	GOMF	GOMF_ANTIGEN_BINDING	0.0345733	0.0585702
Korean	thyroid disease	B_THY	C5	GOCC	GOCC_INTRINSIC_COMPONENT_OF_ENDOPLASMIC_RETICULUM_MEMBRANE	0.034774	0.0585702
Korean	thyroid disease	B_THY	C5	GOCC	GOCC_EARLY_ENDOSOME_MEMBRANE	0.0351752	0.0585702
Korean	thyroid disease	B_THY	C5	GOBP	GOBP_SIGNAL_TRANSDUCTION_IN_RESPONSE_TO_DNA_DAMAGE	0.0353758	0.0585702
Korean	thyroid disease	B_THY	C5	GOBP	GOBP_REGULATION_OF_LYMPHOCYTE_MEDIATED_IMMUNITY	0.0355764	0.0585702
Korean	thyroid disease	B_THY	C5	GOCC	GOCC_COATED_VESICLE_MEMBRANE	0.0357769	0.0585702
Korean	thyroid disease	B_THY	C5	GOBP	GOBP_REGULATION_OF_LYMPHOCYTE_DIFFERENTIATION	0.0367791	0.0597292
Korean	thyroid disease	B_THY	C5	GOBP	GOBP_CELL_KILLING	0.0379806	0.0610255
Korean	thyroid disease	B_THY	C5	GOBP	GOBP_REGULATION_OF_ADAPTIVE_IMMUNE_RESPONSE	0.0381808	0.0610255
Korean	thyroid disease	B_THY	C5	GOBP	GOBP_BIOLOGICAL_PROCESS_INVOLVED_IN_INTERACTION_WITH_HOST	0.038981	0.0610255
Korean	thyroid disease	B_THY	C5	GOCC	GOCC_SPLICEOSOMAL_COMPLEX	0.038981	0.0610255
Korean	thyroid disease	B_THY	C5	GOCC	GOCC_CLATHRIN_COATED_VESICLE	0.039381	0.0610255
Korean	thyroid disease	B_THY	C5	GOCC	GOCC_ENDOCYTIC_VESICLE_MEMBRANE	0.039381	0.0610255
Korean	thyroid disease	B_THY	C5	GOBP	GOBP_RNA_LOCALIZATION	0.0397808	0.0611781
Korean	thyroid disease	B_THY	C5	GOBP	GOBP_LYMPHOCYTE_ACTIVATION_INVOLVED_IN_IMMUNE_RESPONSE	0.0409796	0.0625478
Korean	thyroid disease	B_THY	C5	GOCC	GOCC_TRANSPORT_VESICLE_MEMBRANE	0.0415785	0.0629884
Korean	thyroid disease	B_THY	C5	GOBP	GOBP_B_CELL_MEDIATED_IMMUNITY	0.042975	0.0641465
Korean	thyroid disease	B_THY	C5	GOBP	GOBP_RIBONUCLEOPROTEIN_COMPLEX_SUBUNIT_ORGANIZATION	0.0433737	0.064269
Korean	thyroid disease	B_THY	C5	GOBP	GOBP_IMMUNOGLOBULIN_PRODUCTION	0.0441707	0.0643364
Korean	thyroid disease	B_THY	C5	GOBP	GOBP_NUCLEOBASE_CONTAINING_COMPOUND_TRANSPORT	0.0441707	0.0643364
Korean	thyroid disease	B_THY	C5	GOBP	GOBP_REGULATION_OF_LEUKOCYTE_MIGRATION	0.0443699	0.0643364
Korean	thyroid disease	B_THY	C5	GOBP	GOBP_REGULATION_OF_CHEMOTAXIS	0.0455644	0.0655998
Korean	thyroid disease	B_THY	C5	GOBP	GOBP_LEUKOCYTE_CHEMOTAXIS	0.0477513	0.0680687
Korean	thyroid disease	B_THY	C5	GOBP	GOBP_REGULATION_OF_LEUKOCYTE_MEDIATED_IMMUNITY	0.0479499	0.0680687
Korean	thyroid disease	B_THY	C5	GOBP	GOBP_POSITIVE_REGULATION_OF_LEUKOCYTE_CELL_CELL_ADHESION	0.0495378	0.0694294
Korean	thyroid disease	B_THY	C5	GOBP	GOBP_REGULATION_OF_RESPONSE_TO_DNA_DAMAGE_STIMULUS	0.0497361	0.0694294
Korean	thyroid disease	B_THY	C5	GOBP	GOBP_POSITIVE_REGULATION_OF_CELL_CYCLE_PROCESS	0.0499344	0.0694294
Korean	thyroid disease	B_THY	C5	GOBP	GOBP_POSITIVE_REGULATION_OF_IMMUNE_EFFECTOR_PROCESS	0.0505292	0.0697784
Korean	thyroid disease	B_THY	C5	GOBP	GOBP_NEGATIVE_REGULATION_OF_CELL_CYCLE_PHASE_TRANSITION	0.0515198	0.0701914
Korean	thyroid disease	B_THY	C5	GOCC	GOCC_TRANS_GOLGI_NETWORK	0.0529054	0.0713904
Korean	thyroid disease	B_THY	C5	GOBP	GOBP_T_CELL_DIFFERENTIATION	0.0531032	0.0713904
Korean	thyroid disease	B_THY	C5	GOMF	GOMF_CARBOHYDRATE_BINDING	0.054487	0.0727689
Korean	thyroid disease	B_THY	C5	GOCC	GOCC_LATE_ENDOSOME	0.057053	0.0751054
Korean	thyroid disease	B_THY	C5	GOBP	GOBP_REGULATION_OF_LEUKOCYTE_DIFFERENTIATION	0.0574473	0.0751054
Korean	thyroid disease	B_THY	C5	GOBP	GOBP_BIOLOGICAL_PROCESS_INVOLVED_IN_SYMBIOTIC_INTERACTION	0.0578415	0.0751054
Korean	thyroid disease	B_THY	C5	GOBP	GOBP_POSITIVE_REGULATION_OF_DEFENSE_RESPONSE	0.0580385	0.0751054
Korean	thyroid disease	B_THY	C5	GOBP	GOBP_CELL_ACTIVATION_INVOLVED_IN_IMMUNE_RESPONSE	0.0586295	0.0751054
Korean	thyroid disease	B_THY	C5	GOBP	GOBP_POSITIVE_REGULATION_OF_CELL_CELL_ADHESION	0.0586295	0.0751054
Korean	thyroid disease	B_THY	C5	GOCC	GOCC_COATED_VESICLE	0.0588264	0.0751054
Korean	thyroid disease	B_THY	C5	GOBP	GOBP_NEGATIVE_REGULATION_OF_CELL_CYCLE_PROCESS	0.0605973	0.0768828
Korean	thyroid disease	B_THY	C5	GOBP	GOBP_COGNITION	0.06158	0.0776444
Korean	thyroid disease	B_THY	C5	GOBP	GOBP_NUCLEAR_TRANSPORT	0.0619729	0.0776574
Korean	thyroid disease	B_THY	C5	GOBP	GOBP_PRODUCTION_OF_MOLECULAR_MEDIATOR_OF_IMMUNE_RESPONSE	0.0629546	0.0784035
Korean	thyroid disease	B_THY	C5	GOBP	GOBP_CELL_CHEMOTAXIS	0.063347	0.0784112
Korean	thyroid disease	B_THY	C5	GOBP	GOBP_RNA_SPLICING_VIA_TRANSESTERIFICATION_REACTIONS	0.0647196	0.0789093
Korean	thyroid disease	B_THY	C5	GOBP	GOBP_STEROID_METABOLIC_PROCESS	0.0649156	0.0789093
Korean	thyroid disease	B_THY	C5	GOMF	GOMF_PEPTIDE_BINDING	0.0656991	0.0791538
Korean	thyroid disease	B_THY	C5	GOBP	GOBP_POSITIVE_REGULATION_OF_CELL_CYCLE	0.0660907	0.0791538
Korean	thyroid disease	B_THY	C5	GOMF	GOMF_ATP_HYDROLYSIS_ACTIVITY	0.0662864	0.0791538
Korean	thyroid disease	B_THY	C5	GOBP	GOBP_REGULATION_OF_T_CELL_ACTIVATION	0.068633	0.0810029
Korean	thyroid disease	B_THY	C5	GOCC	GOCC_ENDOCYTIC_VESICLE	0.068633	0.0810029
Korean	thyroid disease	B_THY	C5	GOBP	GOBP_REGULATION_OF_IMMUNE_EFFECTOR_PROCESS	0.0711701	0.0830096
Korean	thyroid disease	B_THY	C5	GOBP	GOBP_LYMPHOCYTE_MEDIATED_IMMUNITY	0.07156	0.0830096
Korean	thyroid disease	B_THY	C5	GOBP	GOBP_ADAPTIVE_IMMUNE_RESPONSE_BASED_ON_SOMATIC_RECOMBINATION_OF_IMMUNE_RECEPTORS_BUILT_FROM_IMMUNOGLOBULIN_SUPERFAMILY_DOMAINS	0.0727289	0.0838861
Korean	thyroid disease	B_THY	C5	GOBP	GOBP_REGULATION_OF_HEMOPOIESIS	0.0748689	0.0858666
Korean	thyroid disease	B_THY	C5	GOBP	GOBP_LEUKOCYTE_CELL_CELL_ADHESION	0.0762288	0.0868002
Korean	thyroid disease	B_THY	C5	GOBP	GOBP_LEUKOCYTE_MIGRATION	0.0770052	0.0868002
Korean	thyroid disease	B_THY	C5	GOBP	GOBP_NEGATIVE_REGULATION_OF_CELL_CYCLE	0.0773933	0.0868002
Korean	thyroid disease	B_THY	C5	GOCC	GOCC_GOLGI_APPARATUS_SUBCOMPARTMENT	0.0773933	0.0868002
Korean	thyroid disease	B_THY	C5	GOCC	GOCC_EARLY_ENDOSOME	0.0789441	0.0875234
Korean	thyroid disease	B_THY	C5	GOMF	GOMF_CATALYTIC_ACTIVITY_ACTING_ON_RNA	0.0789441	0.0875234
Korean	thyroid disease	B_THY	C5	GOBP	GOBP_REGULATION_OF_INFLAMMATORY_RESPONSE	0.0793316	0.0875234
Korean	thyroid disease	B_THY	C5	GOCC	GOCC_TRANSPORT_VESICLE	0.0804931	0.0883248
Korean	thyroid disease	B_THY	C5	GOMF	GOMF_AMIDE_BINDING	0.0816535	0.0885858
Korean	thyroid disease	B_THY	C5	GOCC	GOCC_NUCLEAR_SPECK	0.0818468	0.0885858
Korean	thyroid disease	B_THY	C5	GOCC	GOCC_INTRINSIC_COMPONENT_OF_ORGANELLE_MEMBRANE	0.0820401	0.0885858
Korean	thyroid disease	B_THY	C5	GOBP	GOBP_REGULATION_OF_CELL_CYCLE_PHASE_TRANSITION	0.0828128	0.0889471
Korean	thyroid disease	B_THY	C5	GOBP	GOBP_POSITIVE_REGULATION_OF_CELL_ACTIVATION	0.0855136	0.0908862
Korean	thyroid disease	B_THY	C5	GOBP	GOBP_MONONUCLEAR_CELL_DIFFERENTIATION	0.0864767	0.0909574
Korean	thyroid disease	B_THY	C5	GOBP	GOBP_RNA_SPLICING	0.0864767	0.0909574
Korean	thyroid disease	B_THY	C5	GOBP	GOBP_POSITIVE_REGULATION_OF_RESPONSE_TO_EXTERNAL_STIMULUS	0.0878238	0.0918981
Korean	thyroid disease	B_THY	C5	GOBP	GOBP_POSITIVE_REGULATION_OF_CELL_ADHESION	0.0887851	0.0924276
Korean	thyroid disease	B_THY	C5	GOBP	GOBP_LEUKOCYTE_MEDIATED_IMMUNITY	0.0897457	0.0924555
Korean	thyroid disease	B_THY	C5	GOCC	GOCC_VACUOLAR_MEMBRANE	0.0899377	0.0924555
Korean	thyroid disease	B_THY	C5	GOBP	GOBP_RIBONUCLEOPROTEIN_COMPLEX_BIOGENESIS	0.0903216	0.0924555
Korean	thyroid disease	B_THY	C5	GOBP	GOBP_REGULATION_OF_CELL_CELL_ADHESION	0.0910891	0.0924555
Korean	thyroid disease	B_THY	C5	GOBP	GOBP_POSITIVE_REGULATION_OF_CYTOKINE_PRODUCTION	0.094537	0.0954776
Korean	thyroid disease	B_THY	C5	GOMF	GOMF_NUCLEOSIDE_TRIPHOSPHATASE_REGULATOR_ACTIVITY	0.097021	0.0975013
Korean	thyroid disease	B_THY	C5	GOBP	GOBP_MRNA_PROCESSING	0.0983564	0.0983564
GTEx	type 2 diabetes	B_DM	C5	GOMF	GOMF_CALMODULIN_BINDING	0.000625096	0.0211472
GTEx	type 2 diabetes	B_DM	C5	GOBP	GOBP_REGULATION_OF_LEUKOCYTE_MIGRATION	0.000748849	0.0211472
GTEx	type 2 diabetes	B_DM	C5	GOBP	GOBP_MYELOID_LEUKOCYTE_MIGRATION	0.000825518	0.0211472
GTEx	type 2 diabetes	B_DM	C5	GOBP	GOBP_ACTIVATION_OF_MEIOSIS	0.00102992	0.0211472
GTEx	type 2 diabetes	B_DM	C5	GOBP	GOBP_REGULATION_OF_MONOCYTE_EXTRAVASATION	0.00102992	0.0211472
GTEx	type 2 diabetes	B_DM	C5	GOBP	GOBP_RESPONSE_TO_FLUORIDE	0.00102992	0.0211472
GTEx	type 2 diabetes	B_DM	C5	GOBP	GOBP_RETROGRADE_TRANS_SYNAPTIC_SIGNALING_BY_LIPID	0.00102992	0.0211472
GTEx	type 2 diabetes	B_DM	C5	GOBP	GOBP_CELLULAR_RESPONSE_TO_ETHER	0.00123581	0.0211472
GTEx	type 2 diabetes	B_DM	C5	GOBP	GOBP_INTERLEUKIN_15_MEDIATED_SIGNALING_PATHWAY	0.00123581	0.0211472
GTEx	type 2 diabetes	B_DM	C5	GOBP	GOBP_RESPONSE_TO_INTERLEUKIN_12	0.00144166	0.0211472
GTEx	type 2 diabetes	B_DM	C5	GOBP	GOBP_TRANS_SYNAPTIC_SIGNALING_BY_LIPID	0.00144166	0.0211472
GTEx	type 2 diabetes	B_DM	C5	GOBP	GOBP_GLYCEROPHOSPHOLIPID_METABOLIC_PROCESS	0.00148353	0.0211472
GTEx	type 2 diabetes	B_DM	C5	GOBP	GOBP_MONOCYTE_EXTRAVASATION	0.00164749	0.0211472
GTEx	type 2 diabetes	B_DM	C5	GOBP	GOBP_RESPONSE_TO_INTERLEUKIN_15	0.00164749	0.0211472
GTEx	type 2 diabetes	B_DM	C5	GOBP	GOBP_NEGATIVE_REGULATION_OF_CELLULAR_EXTRAVASATION	0.00185328	0.0211472
GTEx	type 2 diabetes	B_DM	C5	GOBP	GOBP_POSITIVE_REGULATION_OF_RESPIRATORY_BURST	0.00185328	0.0211472
GTEx	type 2 diabetes	B_DM	C5	GOBP	GOBP_TRANSCRIPTION_COUPLED_NUCLEOTIDE_EXCISION_REPAIR	0.00185328	0.0211472
GTEx	type 2 diabetes	B_DM	C5	GOBP	GOBP_EGG_ACTIVATION	0.00205904	0.0211472
GTEx	type 2 diabetes	B_DM	C5	GOBP	GOBP_RETROGRADE_TRANS_SYNAPTIC_SIGNALING	0.00205904	0.0211472
GTEx	type 2 diabetes	B_DM	C5	GOBP	GOBP_RESPONSE_TO_ETHER	0.00226477	0.0211472
GTEx	type 2 diabetes	B_DM	C5	GOBP	GOBP_LEUKOCYTE_MIGRATION	0.00229239	0.0211472
GTEx	type 2 diabetes	B_DM	C5	GOBP	GOBP_PHOSPHOLIPID_METABOLIC_PROCESS	0.00233968	0.0211472
GTEx	type 2 diabetes	B_DM	C5	GOBP	GOBP_GLYCEROLIPID_METABOLIC_PROCESS	0.00242358	0.0211472
GTEx	type 2 diabetes	B_DM	C5	GOBP	GOBP_INOSITOL_TRISPHOSPHATE_METABOLIC_PROCESS	0.00247047	0.0211472
GTEx	type 2 diabetes	B_DM	C5	GOBP	GOBP_POSITIVE_REGULATION_OF_ACROSOME_REACTION	0.00247047	0.0211472
GTEx	type 2 diabetes	B_DM	C5	GOBP	GOBP_POSTSYNAPTIC_MODULATION_OF_CHEMICAL_SYNAPTIC_TRANSMISSION	0.00288177	0.0237192
GTEx	type 2 diabetes	B_DM	C5	GOBP	GOBP_POSITIVE_REGULATION_OF_MEIOTIC_NUCLEAR_DIVISION	0.00329294	0.0247704
GTEx	type 2 diabetes	B_DM	C5	GOMF	GOMF_LAMIN_BINDING	0.00329294	0.0247704
GTEx	type 2 diabetes	B_DM	C5	GOBP	GOBP_REGULATION_OF_FERTILIZATION	0.00349848	0.0247704
GTEx	type 2 diabetes	B_DM	C5	GOBP	GOBP_REGULATION_OF_ACROSOME_REACTION	0.00370399	0.0247704
GTEx	type 2 diabetes	B_DM	C5	GOBP	GOBP_REGULATION_OF_ENDOTHELIAL_CELL_DEVELOPMENT	0.00370399	0.0247704
GTEx	type 2 diabetes	B_DM	C5	GOBP	GOBP_REGULATION_OF_RESPIRATORY_BURST	0.00370399	0.0247704
GTEx	type 2 diabetes	B_DM	C5	GOBP	GOBP_G_PROTEIN_COUPLED_ACETYLCHOLINE_RECEPTOR_SIGNALING_PATHWAY	0.00390946	0.0253523
GTEx	type 2 diabetes	B_DM	C5	GOBP	GOBP_POSITIVE_REGULATION_OF_CREB_TRANSCRIPTION_FACTOR_ACTIVITY	0.0041149	0.0258997
GTEx	type 2 diabetes	B_DM	C5	GOBP	GOBP_POSITIVE_REGULATION_OF_EMBRYONIC_DEVELOPMENT	0.00473104	0.0281234
GTEx	type 2 diabetes	B_DM	C5	GOBP	GOBP_POSITIVE_REGULATION_OF_MYOBLAST_DIFFERENTIATION	0.00473104	0.0281234
GTEx	type 2 diabetes	B_DM	C5	GOBP	GOBP_NEGATIVE_REGULATION_OF_MONONUCLEAR_CELL_MIGRATION	0.00493636	0.0282893
GTEx	type 2 diabetes	B_DM	C5	GOBP	GOBP_PHOSPHATIDYLSERINE_METABOLIC_PROCESS	0.00514164	0.0282893
GTEx	type 2 diabetes	B_DM	C5	GOBP	GOBP_POSITIVE_REGULATION_OF_MEIOTIC_CELL_CYCLE	0.00534689	0.0282893
GTEx	type 2 diabetes	B_DM	C5	GOBP	GOBP_POSITIVE_REGULATION_OF_GLYCOPROTEIN_METABOLIC_PROCESS	0.00555211	0.0282893
GTEx	type 2 diabetes	B_DM	C5	GOBP	GOBP_POSITIVE_REGULATION_OF_GRANULOCYTE_CHEMOTAXIS	0.00555211	0.0282893
GTEx	type 2 diabetes	B_DM	C5	GOMF	GOMF_CALMODULIN_DEPENDENT_PROTEIN_KINASE_ACTIVITY	0.00555211	0.0282893
GTEx	type 2 diabetes	B_DM	C5	GOMF	GOMF_PHOSPHOLIPASE_C_ACTIVITY	0.0057573	0.0286526
GTEx	type 2 diabetes	B_DM	C5	GOBP	GOBP_INTERLEUKIN_1_MEDIATED_SIGNALING_PATHWAY	0.00616759	0.0299497
GTEx	type 2 diabetes	B_DM	C5	GOBP	GOBP_POSITIVE_REGULATION_OF_NEUTROPHIL_MIGRATION	0.00657774	0.0299497
GTEx	type 2 diabetes	B_DM	C5	GOBP	GOBP_REGULATION_OF_MEIOTIC_NUCLEAR_DIVISION	0.00657774	0.0299497
GTEx	type 2 diabetes	B_DM	C5	GOBP	GOBP_RESPONSE_TO_ACETYLCHOLINE	0.00657774	0.0299497
GTEx	type 2 diabetes	B_DM	C5	GOBP	GOBP_REGULATION_OF_NEUTROPHIL_CHEMOTAXIS	0.00678277	0.0302399
GTEx	type 2 diabetes	B_DM	C5	GOBP	GOBP_GLYCEROPHOSPHOLIPID_CATABOLIC_PROCESS	0.00698777	0.030518
GTEx	type 2 diabetes	B_DM	C5	GOBP	GOBP_CELLULAR_RESPONSE_TO_FATTY_ACID	0.00719274	0.0307849
GTEx	type 2 diabetes	B_DM	C5	GOBP	GOBP_INSULIN_LIKE_GROWTH_FACTOR_RECEPTOR_SIGNALING_PATHWAY	0.00760258	0.0312875
GTEx	type 2 diabetes	B_DM	C5	GOBP	GOBP_RESPIRATORY_BURST	0.00760258	0.0312875
GTEx	type 2 diabetes	B_DM	C5	GOBP	GOBP_POSTSYNAPTIC_SIGNAL_TRANSDUCTION	0.00780745	0.0315244
GTEx	type 2 diabetes	B_DM	C5	GOBP	GOBP_ACROSOME_REACTION	0.00821709	0.031972
GTEx	type 2 diabetes	B_DM	C5	GOBP	GOBP_REGULATION_OF_CELLULAR_EXTRAVASATION	0.00821709	0.031972
GTEx	type 2 diabetes	B_DM	C5	GOBP	GOBP_POSITIVE_REGULATION_OF_INTERLEUKIN_12_PRODUCTION	0.00862662	0.032966
GTEx	type 2 diabetes	B_DM	C5	GOBP	GOBP_REGULATION_OF_NEUTROPHIL_MIGRATION	0.00944528	0.0348498
GTEx	type 2 diabetes	B_DM	C5	GOBP	GOBP_REGULATION_OF_ENDOTHELIAL_CELL_DIFFERENTIATION	0.00985442	0.0352669
GTEx	type 2 diabetes	B_DM	C5	GOBP	GOBP_REGULATION_OF_GRANULOCYTE_CHEMOTAXIS	0.0104679	0.0352669
GTEx	type 2 diabetes	B_DM	C5	GOBP	GOBP_REGULATION_OF_MEIOTIC_CELL_CYCLE	0.0104679	0.0352669
GTEx	type 2 diabetes	B_DM	C5	GOBP	GOBP_GLUTAMATE_RECEPTOR_SIGNALING_PATHWAY	0.0106723	0.0352669
GTEx	type 2 diabetes	B_DM	C5	GOBP	GOBP_NEGATIVE_REGULATION_OF_LEUKOCYTE_MIGRATION	0.0106723	0.0352669
GTEx	type 2 diabetes	B_DM	C5	GOBP	GOBP_ESTABLISHMENT_OF_ENDOTHELIAL_BARRIER	0.0108767	0.0352669
GTEx	type 2 diabetes	B_DM	C5	GOBP	GOBP_PHOSPHOLIPID_CATABOLIC_PROCESS	0.0108767	0.0352669
GTEx	type 2 diabetes	B_DM	C5	GOBP	GOBP_POSITIVE_REGULATION_OF_G1_S_TRANSITION_OF_MITOTIC_CELL_CYCLE	0.0108767	0.0352669
GTEx	type 2 diabetes	B_DM	C5	GOBP	GOBP_REGULATION_OF_MYOBLAST_DIFFERENTIATION	0.0110811	0.0353933
GTEx	type 2 diabetes	B_DM	C5	GOBP	GOBP_INOSITOL_PHOSPHATE_METABOLIC_PROCESS	0.0112854	0.0355159
GTEx	type 2 diabetes	B_DM	C5	GOMF	GOMF_RNA_POLYMERASE_CORE_ENZYME_BINDING	0.011694	0.0362683
GTEx	type 2 diabetes	B_DM	C5	GOBP	GOBP_POSITIVE_REGULATION_OF_NUCLEAR_DIVISION	0.0121024	0.0369988
GTEx	type 2 diabetes	B_DM	C5	GOBP	GOBP_NUCLEOTIDE_EXCISION_REPAIR	0.0123066	0.0370931
GTEx	type 2 diabetes	B_DM	C5	GOBP	GOBP_INTERLEUKIN_12_PRODUCTION	0.0129189	0.0374442
GTEx	type 2 diabetes	B_DM	C5	GOBP	GOBP_RESPONSE_TO_FATTY_ACID	0.0129189	0.0374442
GTEx	type 2 diabetes	B_DM	C5	GOBP	GOBP_REGULATION_OF_EMBRYONIC_DEVELOPMENT	0.013123	0.0374442
GTEx	type 2 diabetes	B_DM	C5	GOBP	GOBP_REGULATION_OF_GLYCOPROTEIN_METABOLIC_PROCESS	0.013123	0.0374442
GTEx	type 2 diabetes	B_DM	C5	GOBP	GOBP_POSITIVE_REGULATION_OF_CELL_CYCLE_G1_S_PHASE_TRANSITION	0.013531	0.0381004
GTEx	type 2 diabetes	B_DM	C5	GOBP	GOBP_GLYCEROLIPID_CATABOLIC_PROCESS	0.0139389	0.0387392
GTEx	type 2 diabetes	B_DM	C5	GOBP	GOBP_ENDOTHELIAL_CELL_DEVELOPMENT	0.0141427	0.0388019
GTEx	type 2 diabetes	B_DM	C5	GOCC	GOCC_GABA_ERGIC_SYNAPSE	0.0143466	0.0388629
GTEx	type 2 diabetes	B_DM	C5	GOBP	GOBP_POSITIVE_REGULATION_OF_PHAGOCYTOSIS	0.0145504	0.0389224
GTEx	type 2 diabetes	B_DM	C5	GOMF	GOMF_RNA_POLYMERASE_BINDING	0.014958	0.0390917
GTEx	type 2 diabetes	B_DM	C5	GOBP	GOBP_CELLULAR_EXTRAVASATION	0.0151617	0.0390917
GTEx	type 2 diabetes	B_DM	C5	GOMF	GOMF_BASAL_TRANSCRIPTION_MACHINERY_BINDING	0.0151617	0.0390917
GTEx	type 2 diabetes	B_DM	C5	GOMF	GOMF_PHOSPHATIDYLINOSITOL_4_5_BISPHOSPHATE_BINDING	0.0169939	0.0432939
GTEx	type 2 diabetes	B_DM	C5	GOBP	GOBP_POSITIVE_REGULATION_OF_REPRODUCTIVE_PROCESS	0.0174007	0.0438054
GTEx	type 2 diabetes	B_DM	C5	GOBP	GOBP_MYOBLAST_DIFFERENTIATION	0.017604	0.0438054
GTEx	type 2 diabetes	B_DM	C5	GOMF	GOMF_PHOSPHORIC_DIESTER_HYDROLASE_ACTIVITY	0.0184171	0.0447871
GTEx	type 2 diabetes	B_DM	C5	GOBP	GOBP_POSITIVE_REGULATION_OF_LEUKOCYTE_CHEMOTAXIS	0.0192297	0.0462068
GTEx	type 2 diabetes	B_DM	C5	GOBP	GOBP_POSITIVE_REGULATION_OF_JNK_CASCADE	0.0194328	0.0462068
GTEx	type 2 diabetes	B_DM	C5	GOBP	GOBP_REGULATION_OF_DENDRITE_DEVELOPMENT	0.0200418	0.0470516
GTEx	type 2 diabetes	B_DM	C5	GOBP	GOBP_POSITIVE_REGULATION_OF_MITOTIC_CELL_CYCLE_PHASE_TRANSITION	0.0204477	0.0470516
GTEx	type 2 diabetes	B_DM	C5	GOBP	GOBP_REGULATION_OF_PHAGOCYTOSIS	0.0204477	0.0470516
GTEx	type 2 diabetes	B_DM	C5	GOBP	GOBP_NEUTROPHIL_CHEMOTAXIS	0.0214617	0.0478418
GTEx	type 2 diabetes	B_DM	C5	GOMF	GOMF_PHOSPHATIDYLINOSITOL_BISPHOSPHATE_BINDING	0.0218671	0.048243
GTEx	type 2 diabetes	B_DM	C5	GOBP	GOBP_CELLULAR_RESPONSE_TO_INTERLEUKIN_1	0.022475	0.0485824
GTEx	type 2 diabetes	B_DM	C5	GOMF	GOMF_PHOSPHOLIPASE_ACTIVITY	0.022475	0.0485824
GTEx	type 2 diabetes	B_DM	C5	GOBP	GOBP_CEREBRAL_CORTEX_DEVELOPMENT	0.0228801	0.0489635
GTEx	type 2 diabetes	B_DM	C5	GOBP	GOBP_POLYOL_METABOLIC_PROCESS	0.0236899	0.0497024
GTEx	type 2 diabetes	B_DM	C5	GOBP	GOBP_REGULATION_OF_MONONUCLEAR_CELL_MIGRATION	0.0236899	0.0497024
GTEx	type 2 diabetes	B_DM	C5	GOBP	GOBP_MEMORY	0.0249037	0.0515803
GTEx	type 2 diabetes	B_DM	C5	GOBP	GOBP_POSITIVE_REGULATION_OF_CELL_CYCLE_PHASE_TRANSITION	0.0251059	0.0515803
GTEx	type 2 diabetes	B_DM	C5	GOBP	GOBP_REGULATION_OF_LEUKOCYTE_CHEMOTAXIS	0.0253081	0.0515803
GTEx	type 2 diabetes	B_DM	C5	GOBP	GOBP_GRANULOCYTE_CHEMOTAXIS	0.0259143	0.0517491
GTEx	type 2 diabetes	B_DM	C5	GOBP	GOBP_NEUTROPHIL_MIGRATION	0.0261164	0.0517491
GTEx	type 2 diabetes	B_DM	C5	GOBP	GOBP_POSITIVE_REGULATION_OF_MITOTIC_CELL_CYCLE	0.0261164	0.0517491
GTEx	type 2 diabetes	B_DM	C5	GOBP	GOBP_POSITIVE_REGULATION_OF_STRESS_ACTIVATED_PROTEIN_KINASE_SIGNALING_CASCADE	0.0271261	0.052567
GTEx	type 2 diabetes	B_DM	C5	GOMF	GOMF_LIPASE_ACTIVITY	0.0275297	0.052567
GTEx	type 2 diabetes	B_DM	C5	GOBP	GOBP_ENDOTHELIUM_DEVELOPMENT	0.0281349	0.052567
GTEx	type 2 diabetes	B_DM	C5	GOBP	GOBP_REGULATION_OF_G_PROTEIN_COUPLED_RECEPTOR_SIGNALING_PATHWAY	0.0283366	0.052567
GTEx	type 2 diabetes	B_DM	C5	GOBP	GOBP_REGULATION_OF_NUCLEAR_DIVISION	0.0283366	0.052567
GTEx	type 2 diabetes	B_DM	C5	GOBP	GOBP_POSITIVE_REGULATION_OF_CHEMOTAXIS	0.0285383	0.052567
GTEx	type 2 diabetes	B_DM	C5	GOBP	GOBP_RESPONSE_TO_INTERLEUKIN_1	0.0285383	0.052567
GTEx	type 2 diabetes	B_DM	C5	GOBP	GOBP_POSITIVE_REGULATION_OF_LEUKOCYTE_MIGRATION	0.0287399	0.052567
GTEx	type 2 diabetes	B_DM	C5	GOBP	GOBP_REGULATION_OF_JNK_CASCADE	0.0287399	0.052567
GTEx	type 2 diabetes	B_DM	C5	GOBP	GOBP_LEARNING	0.0295461	0.0535836
GTEx	type 2 diabetes	B_DM	C5	GOBP	GOBP_RESPONSE_TO_UV	0.029949	0.0537682
GTEx	type 2 diabetes	B_DM	C5	GOBP	GOBP_CELLULAR_RESPONSE_TO_CARBOHYDRATE_STIMULUS	0.0301504	0.0537682
GTEx	type 2 diabetes	B_DM	C5	GOBP	GOBP_POSITIVE_REGULATION_OF_NEURON_PROJECTION_DEVELOPMENT	0.0305531	0.053772
GTEx	type 2 diabetes	B_DM	C5	GOBP	GOBP_GRANULOCYTE_MIGRATION	0.0313581	0.053772
GTEx	type 2 diabetes	B_DM	C5	GOBP	GOBP_CELL_CYCLE_G2_M_PHASE_TRANSITION	0.0315593	0.053772
GTEx	type 2 diabetes	B_DM	C5	GOBP	GOBP_SINGLE_FERTILIZATION	0.0317605	0.053772
GTEx	type 2 diabetes	B_DM	C5	GOBP	GOBP_ORGANOPHOSPHATE_CATABOLIC_PROCESS	0.0321627	0.053772
GTEx	type 2 diabetes	B_DM	C5	GOBP	GOBP_REGULATION_OF_EPITHELIAL_CELL_DIFFERENTIATION	0.0321627	0.053772
GTEx	type 2 diabetes	B_DM	C5	GOBP	GOBP_PHOSPHATIDYLINOSITOL_METABOLIC_PROCESS	0.0329667	0.0542683
GTEx	type 2 diabetes	B_DM	C5	GOBP	GOBP_SPHINGOLIPID_METABOLIC_PROCESS	0.0329667	0.0542683
GTEx	type 2 diabetes	B_DM	C5	GOBP	GOBP_PALLIUM_DEVELOPMENT	0.0343726	0.0557252
GTEx	type 2 diabetes	B_DM	C5	GOBP	GOBP_POSITIVE_REGULATION_OF_DEVELOPMENTAL_GROWTH	0.0343726	0.0557252
GTEx	type 2 diabetes	B_DM	C5	GOBP	GOBP_JNK_CASCADE	0.0355764	0.056816
GTEx	type 2 diabetes	B_DM	C5	GOMF	GOMF_PHOSPHATIDYLINOSITOL_PHOSPHATE_BINDING	0.0355764	0.056816
GTEx	type 2 diabetes	B_DM	C5	GOBP	GOBP_REGULATION_OF_REPRODUCTIVE_PROCESS	0.0361779	0.0573486
GTEx	type 2 diabetes	B_DM	C5	GOBP	GOBP_INOSITOL_LIPID_MEDIATED_SIGNALING	0.0367791	0.0578729
GTEx	type 2 diabetes	B_DM	C5	GOBP	GOBP_REGULATION_OF_CELL_CYCLE_G1_S_PHASE_TRANSITION	0.0381808	0.0592078
GTEx	type 2 diabetes	B_DM	C5	GOBP	GOBP_CELLULAR_MODIFIED_AMINO_ACID_METABOLIC_PROCESS	0.038581	0.059398
GTEx	type 2 diabetes	B_DM	C5	GOBP	GOBP_FERTILIZATION	0.0399807	0.0611133
GTEx	type 2 diabetes	B_DM	C5	GOBP	GOBP_MONONUCLEAR_CELL_MIGRATION	0.0403803	0.0612865
GTEx	type 2 diabetes	B_DM	C5	GOBP	GOBP_RESPONSE_TO_MONOSACCHARIDE	0.0407799	0.0614008
GTEx	type 2 diabetes	B_DM	C5	GOBP	GOBP_REGULATION_OF_STRESS_ACTIVATED_PROTEIN_KINASE_SIGNALING_CASCADE	0.0411793	0.0614008
GTEx	type 2 diabetes	B_DM	C5	GOBP	GOBP_MEIOTIC_CELL_CYCLE_PROCESS	0.0419777	0.0614008
GTEx	type 2 diabetes	B_DM	C5	GOBP	GOBP_EPITHELIAL_CELL_DEVELOPMENT	0.0421772	0.0614008
GTEx	type 2 diabetes	B_DM	C5	GOBP	GOBP_MEMBRANE_LIPID_METABOLIC_PROCESS	0.0421772	0.0614008
GTEx	type 2 diabetes	B_DM	C5	GOBP	GOBP_CELLULAR_LIPID_CATABOLIC_PROCESS	0.0445691	0.0644445
GTEx	type 2 diabetes	B_DM	C5	GOBP	GOBP_REGULATION_OF_CHEMOTAXIS	0.0455644	0.0651386
GTEx	type 2 diabetes	B_DM	C5	GOBP	GOBP_RESPONSE_TO_CARBOHYDRATE	0.0459623	0.0651386
GTEx	type 2 diabetes	B_DM	C5	GOBP	GOBP_DENDRITE_DEVELOPMENT	0.0467577	0.0658299
GTEx	type 2 diabetes	B_DM	C5	GOBP	GOBP_LEUKOCYTE_CHEMOTAXIS	0.0477513	0.0667894
GTEx	type 2 diabetes	B_DM	C5	GOBP	GOBP_FAT_CELL_DIFFERENTIATION	0.0481485	0.0669076
GTEx	type 2 diabetes	B_DM	C5	GOBP	GOBP_POSITIVE_REGULATION_OF_CELL_CYCLE_PROCESS	0.0499344	0.0689417
GTEx	type 2 diabetes	B_DM	C5	GOBP	GOBP_TELENCEPHALON_DEVELOPMENT	0.0503309	0.0690437
GTEx	type 2 diabetes	B_DM	C5	GOBP	GOBP_STRESS_ACTIVATED_PROTEIN_KINASE_SIGNALING_CASCADE	0.0511236	0.0696076
GTEx	type 2 diabetes	B_DM	C5	GOBP	GOBP_CELL_CYCLE_G1_S_PHASE_TRANSITION	0.0515198	0.0696076
GTEx	type 2 diabetes	B_DM	C5	GOBP	GOBP_POSITIVE_REGULATION_OF_GROWTH	0.0517178	0.0696076
GTEx	type 2 diabetes	B_DM	C5	GOBP	GOBP_POSITIVE_REGULATION_OF_DNA_BINDING_TRANSCRIPTION_FACTOR_ACTIVITY	0.053301	0.0712901
GTEx	type 2 diabetes	B_DM	C5	GOBP	GOBP_MEIOTIC_CELL_CYCLE	0.0536965	0.0713729
GTEx	type 2 diabetes	B_DM	C5	GOMF	GOMF_PHOSPHATIDYLINOSITOL_BINDING	0.0550797	0.0727595
GTEx	type 2 diabetes	B_DM	C5	GOMF	GOMF_GTPASE_ACTIVATOR_ACTIVITY	0.0554746	0.0728316
GTEx	type 2 diabetes	B_DM	C5	GOBP	GOBP_CELLULAR_RESPONSE_TO_PEPTIDE_HORMONE_STIMULUS	0.0592201	0.0768067
GTEx	type 2 diabetes	B_DM	C5	GOCC	GOCC_NUCLEAR_MEMBRANE	0.0604006	0.0773996
GTEx	type 2 diabetes	B_DM	C5	GOBP	GOBP_PHAGOCYTOSIS	0.0613835	0.0779771
GTEx	type 2 diabetes	B_DM	C5	GOBP	GOBP_COGNITION	0.06158	0.0779771
GTEx	type 2 diabetes	B_DM	C5	GOBP	GOBP_RESPONSE_TO_LIGHT_STIMULUS	0.0623657	0.0780482
GTEx	type 2 diabetes	B_DM	C5	GOBP	GOBP_CELL_CHEMOTAXIS	0.063347	0.0788155
GTEx	type 2 diabetes	B_DM	C5	GOCC	GOCC_GLUTAMATERGIC_SYNAPSE	0.0637393	0.0788452
GTEx	type 2 diabetes	B_DM	C5	GOBP	GOBP_GLYCOPROTEIN_BIOSYNTHETIC_PROCESS	0.0641315	0.0788744
GTEx	type 2 diabetes	B_DM	C5	GOBP	GOBP_REGULATION_OF_MITOTIC_CELL_CYCLE_PHASE_TRANSITION	0.0645236	0.0789032
GTEx	type 2 diabetes	B_DM	C5	GOBP	GOBP_LIPID_CATABOLIC_PROCESS	0.0658949	0.0794574
GTEx	type 2 diabetes	B_DM	C5	GOBP	GOBP_POSITIVE_REGULATION_OF_CELL_CYCLE	0.0660907	0.0794574
GTEx	type 2 diabetes	B_DM	C5	GOBP	GOBP_REGULATION_OF_DEVELOPMENTAL_GROWTH	0.0660907	0.0794574
GTEx	type 2 diabetes	B_DM	C5	GOBP	GOBP_PEPTIDYL_SERINE_MODIFICATION	0.0678513	0.0811183
GTEx	type 2 diabetes	B_DM	C5	GOBP	GOBP_POSITIVE_REGULATION_OF_CELL_PROJECTION_ORGANIZATION	0.0684376	0.0813647
GTEx	type 2 diabetes	B_DM	C5	GOMF	GOMF_PROTEIN_SERINE_KINASE_ACTIVITY	0.0721446	0.0836754
GTEx	type 2 diabetes	B_DM	C5	GOBP	GOBP_ALCOHOL_METABOLIC_PROCESS	0.0723394	0.0836754
GTEx	type 2 diabetes	B_DM	C5	GOBP	GOBP_CELLULAR_RESPONSE_TO_PEPTIDE	0.0729236	0.0836754
GTEx	type 2 diabetes	B_DM	C5	GOMF	GOMF_PHOSPHORIC_ESTER_HYDROLASE_ACTIVITY	0.0746745	0.0850018
GTEx	type 2 diabetes	B_DM	C5	GOBP	GOBP_FOREBRAIN_DEVELOPMENT	0.0754519	0.0854323
GTEx	type 2 diabetes	B_DM	C5	GOBP	GOBP_GLYCOPROTEIN_METABOLIC_PROCESS	0.0775872	0.0873877
GTEx	type 2 diabetes	B_DM	C5	GOBP	GOBP_NEGATIVE_REGULATION_OF_LOCOMOTION	0.0791379	0.0886676
GTEx	type 2 diabetes	B_DM	C5	GOBP	GOBP_RESPONSE_TO_PEPTIDE_HORMONE	0.0806866	0.0899319
GTEx	type 2 diabetes	B_DM	C5	GOCC	GOCC_NUCLEAR_SPECK	0.0818468	0.0907524
GTEx	type 2 diabetes	B_DM	C5	GOBP	GOBP_REGULATION_OF_CELL_CYCLE_PHASE_TRANSITION	0.0828128	0.0913502
GTEx	type 2 diabetes	B_DM	C5	GOBP	GOBP_NEGATIVE_REGULATION_OF_IMMUNE_SYSTEM_PROCESS	0.0847426	0.0929995
GTEx	type 2 diabetes	B_DM	C5	GOBP	GOBP_REGULATION_OF_TRANS_SYNAPTIC_SIGNALING	0.0855136	0.0930485
GTEx	type 2 diabetes	B_DM	C5	GOBP	GOBP_REGULATION_OF_NEURON_PROJECTION_DEVELOPMENT	0.0858989	0.0930485
GTEx	type 2 diabetes	B_DM	C5	GOMF	GOMF_PROTEIN_SERINE_THREONINE_KINASE_ACTIVITY	0.0860916	0.0930485
GTEx	type 2 diabetes	B_DM	C5	GOBP	GOBP_RESPONSE_TO_RADIATION	0.0872467	0.093504
GTEx	type 2 diabetes	B_DM	C5	GOBP	GOBP_MITOTIC_CELL_CYCLE_PHASE_TRANSITION	0.0876315	0.093504
GTEx	type 2 diabetes	B_DM	C5	GOBP	GOBP_POSITIVE_REGULATION_OF_RESPONSE_TO_EXTERNAL_STIMULUS	0.0878238	0.093504
GTEx	type 2 diabetes	B_DM	C5	GOMF	GOMF_PROTEIN_SERINE_THREONINE_TYROSINE_KINASE_ACTIVITY	0.0887851	0.0940595
GTEx	type 2 diabetes	B_DM	C5	GOBP	GOBP_REGULATION_OF_DNA_BINDING_TRANSCRIPTION_FACTOR_ACTIVITY	0.0897457	0.0946087
GTEx	type 2 diabetes	B_DM	C5	GOMF	GOMF_PHOSPHOLIPID_BINDING	0.0931973	0.0977658
GTEx	type 2 diabetes	B_DM	C5	GOBP	GOBP_POSITIVE_REGULATION_OF_CYTOKINE_PRODUCTION	0.094537	0.0985246
GTEx	type 2 diabetes	B_DM	C5	GOCC	GOCC_NUCLEAR_ENVELOPE	0.0951107	0.0985246
GTEx	type 2 diabetes	B_DM	C5	GOBP	GOBP_REGULATION_OF_MITOTIC_CELL_CYCLE	0.0953018	0.0985246
GTEx	type 2 diabetes	B_DM	C5	GOBP	GOBP_CYTOKINE_MEDIATED_SIGNALING_PATHWAY	0.0962572	0.0988181
GTEx	type 2 diabetes	B_DM	C5	GOBP	GOBP_POSITIVE_REGULATION_OF_ORGANELLE_ORGANIZATION	0.0966391	0.0988181
GTEx	type 2 diabetes	B_DM	C5	GOMF	GOMF_NUCLEOSIDE_TRIPHOSPHATASE_REGULATOR_ACTIVITY	0.097021	0.0988181
GTEx	type 2 diabetes	B_DM	C5	GOBP	GOBP_POSITIVE_REGULATION_OF_MAPK_CASCADE	0.0975935	0.0988181
GTEx	type 2 diabetes	B_DM	C5	GOBP	GOBP_RESPONSE_TO_PEPTIDE	0.097975	0.0988181
GTEx	type 2 diabetes	B_DM	C5	GOBP	GOBP_ORGANELLE_FISSION	0.0983564	0.0988181
GTEx	type 2 diabetes	B_DM	C5	GOBP	GOBP_REGULATION_OF_CELL_DEVELOPMENT	0.0991188	0.0991188
GTEx	hypertension	B_HTN	C5	GOMF	GOMF_ACTIN_FILAMENT_BINDING	0.000281304	0.0853896
GTEx	hypertension	B_HTN	C5	GOMF	GOMF_CELL_ADHESION_MEDIATOR_ACTIVITY	0.000691279	0.0853896
GTEx	hypertension	B_HTN	C5	GOBP	GOBP_REGULATION_OF_PROTEIN_CONTAINING_COMPLEX_ASSEMBLY	0.00167517	0.0853896
GTEx	hypertension	B_HTN	C5	GOMF	GOMF_ACTIN_BINDING	0.00218443	0.0853896
GTEx	hypertension	B_HTN	C5	GOBP	GOBP_ACTIN_FILAMENT_ORGANIZATION	0.00231425	0.0853896
GTEx	hypertension	B_HTN	C5	GOBP	GOBP_REGULATION_OF_ANATOMICAL_STRUCTURE_SIZE	0.0029154	0.0853896
GTEx	hypertension	B_HTN	C5	GOBP	GOBP_IMP_CATABOLIC_PROCESS	0.00308721	0.0853896
GTEx	hypertension	B_HTN	C5	GOMF	GOMF_COLLAGEN_BINDING_INVOLVED_IN_CELL_MATRIX_ADHESION	0.00308721	0.0853896
GTEx	hypertension	B_HTN	C5	GOBP	GOBP_COMMON_PARTNER_SMAD_PROTEIN_PHOSPHORYLATION	0.0037036	0.0853896
GTEx	hypertension	B_HTN	C5	GOBP	GOBP_REGULATION_OF_ACTIN_FILAMENT_LENGTH	0.00411788	0.0853896
GTEx	hypertension	B_HTN	C5	GOBP	GOBP_SPONTANEOUS_NEUROTRANSMITTER_SECRETION	0.00431965	0.0853896
GTEx	hypertension	B_HTN	C5	GOMF	GOMF_CELL_MATRIX_ADHESION_MEDIATOR_ACTIVITY	0.00431965	0.0853896
GTEx	hypertension	B_HTN	C5	GOBP	GOBP_ACTIN_FILAMENT_POLYMERIZATION	0.00453436	0.0853896
GTEx	hypertension	B_HTN	C5	GOBP	GOBP_ALLANTOIN_METABOLIC_PROCESS	0.00493534	0.0853896
GTEx	hypertension	B_HTN	C5	GOMF	GOMF_PRIMARY_MIRNA_BINDING	0.00493534	0.0853896
GTEx	hypertension	B_HTN	C5	GOBP	GOBP_REGULATION_OF_PROTEIN_ADP_RIBOSYLATION	0.00555069	0.0853896
GTEx	hypertension	B_HTN	C5	GOCC	GOCC_CUTICULAR_PLATE	0.00555069	0.0853896
GTEx	hypertension	B_HTN	C5	GOCC	GOCC_SPECTRIN	0.00555069	0.0853896
GTEx	hypertension	B_HTN	C5	GOCC	GOCC_SPECTRIN_ASSOCIATED_CYTOSKELETON	0.00555069	0.0853896
GTEx	hypertension	B_HTN	C5	GOMF	GOMF_SELENIUM_BINDING	0.00555069	0.0853896
GTEx	hypertension	B_HTN	C5	GOBP	GOBP_POSITIVE_REGULATION_OF_PROTEIN_CONTAINING_COMPLEX_ASSEMBLY	0.00620067	0.0853896
GTEx	hypertension	B_HTN	C5	GOBP	GOBP_ACTIN_POLYMERIZATION_OR_DEPOLYMERIZATION	0.00626244	0.0853896
GTEx	hypertension	B_HTN	C5	GOBP	GOBP_REGULATION_OF_PROTEIN_POLYMERIZATION	0.00651238	0.0853896
GTEx	hypertension	B_HTN	C5	GOBP	GOBP_ADENOSINE_METABOLIC_PROCESS	0.00678033	0.0853896
GTEx	hypertension	B_HTN	C5	GOBP	GOBP_NEGATIVE_REGULATION_OF_CAMP_MEDIATED_SIGNALING	0.00678033	0.0853896
GTEx	hypertension	B_HTN	C5	GOBP	GOBP_PURINE_NUCLEOSIDE_MONOPHOSPHATE_CATABOLIC_PROCESS	0.00678033	0.0853896
GTEx	hypertension	B_HTN	C5	GOBP	GOBP_POSITIVE_REGULATION_OF_PRODUCTION_OF_MIRNAS_INVOLVED_IN_GENE_SILENCING_BY_MIRNA	0.00739463	0.0853896
GTEx	hypertension	B_HTN	C5	GOMF	GOMF_PHOSPHATE_ION_BINDING	0.00739463	0.0853896
GTEx	hypertension	B_HTN	C5	GOBP	GOBP_POSITIVE_REGULATION_OF_PSEUDOPODIUM_ASSEMBLY	0.00800858	0.0853896
GTEx	hypertension	B_HTN	C5	GOBP	GOBP_SPONTANEOUS_SYNAPTIC_TRANSMISSION	0.00800858	0.0853896
GTEx	hypertension	B_HTN	C5	GOCC	GOCC_AXOLEMMA	0.00800858	0.0853896
GTEx	hypertension	B_HTN	C5	GOMF	GOMF_INOSITOL_1_4_5_TRISPHOSPHATE_BINDING	0.00800858	0.0853896
GTEx	hypertension	B_HTN	C5	GOCC	GOCC_CONTRACTILE_FIBER	0.00911002	0.0853896
GTEx	hypertension	B_HTN	C5	GOBP	GOBP_POSITIVE_REGULATION_OF_DNA_DAMAGE_RESPONSE_SIGNAL_TRANSDUCTION_BY_P53_CLASS_MEDIATOR	0.00923544	0.0853896
GTEx	hypertension	B_HTN	C5	GOBP	GOBP_RIBONUCLEOSIDE_MONOPHOSPHATE_CATABOLIC_PROCESS	0.00923544	0.0853896
GTEx	hypertension	B_HTN	C5	GOMF	GOMF_NUCLEOTIDASE_ACTIVITY	0.00923544	0.0853896
GTEx	hypertension	B_HTN	C5	GOBP	GOBP_PSEUDOPODIUM_ORGANIZATION	0.00984835	0.0853896
GTEx	hypertension	B_HTN	C5	GOBP	GOBP_IMP_METABOLIC_PROCESS	0.0110731	0.0860755
GTEx	hypertension	B_HTN	C5	GOMF	GOMF_CADHERIN_BINDING_INVOLVED_IN_CELL_CELL_ADHESION	0.0110731	0.0860755
GTEx	hypertension	B_HTN	C5	GOBP	GOBP_REGULATION_OF_ACTIN_FILAMENT_ORGANIZATION	0.0114385	0.0860755
GTEx	hypertension	B_HTN	C5	GOBP	GOBP_NUCLEOSIDE_MONOPHOSPHATE_CATABOLIC_PROCESS	0.011685	0.0860755
GTEx	hypertension	B_HTN	C5	GOMF	GOMF_ANKYRIN_BINDING	0.011685	0.0860755
GTEx	hypertension	B_HTN	C5	GOBP	GOBP_PROTEIN_POLYMERIZATION	0.0119328	0.0860755
GTEx	hypertension	B_HTN	C5	GOBP	GOBP_REGULATION_OF_SKELETAL_MUSCLE_CELL_DIFFERENTIATION	0.0122965	0.0860755
GTEx	hypertension	B_HTN	C5	GOCC	GOCC_STRIATED_MUSCLE_THIN_FILAMENT	0.0129077	0.0879335
GTEx	hypertension	B_HTN	C5	GOBP	GOBP_POSITIVE_REGULATION_OF_PHOSPHOPROTEIN_PHOSPHATASE_ACTIVITY	0.0135185	0.0898367
GTEx	hypertension	B_HTN	C5	GOBP	GOBP_PURINE_RIBONUCLEOSIDE_METABOLIC_PROCESS	0.0135185	0.0898367
GTEx	hypertension	B_HTN	C5	GOMF	GOMF_GTPASE_BINDING	0.0138251	0.0898367
GTEx	hypertension	B_HTN	C5	GOBP	GOBP_REGULATION_OF_PRODUCTION_OF_SMALL_RNA_INVOLVED_IN_GENE_SILENCING_BY_RNA	0.014129	0.0898367
GTEx	hypertension	B_HTN	C5	GOCC	GOCC_M_BAND	0.014129	0.0898367
GTEx	hypertension	B_HTN	C5	GOMF	GOMF_R_SMAD_BINDING	0.0147391	0.0921798
GTEx	hypertension	B_HTN	C5	GOCC	GOCC_MYOFILAMENT	0.0153489	0.0923735
GTEx	hypertension	B_HTN	C5	GOBP	GOBP_PURINE_NUCLEOSIDE_METABOLIC_PROCESS	0.0165674	0.0923735
GTEx	hypertension	B_HTN	C5	GOMF	GOMF_ANDROGEN_RECEPTOR_BINDING	0.0165674	0.0923735
GTEx	hypertension	B_HTN	C5	GOBP	GOBP_POSITIVE_REGULATION_OF_SIGNAL_TRANSDUCTION_BY_P53_CLASS_MEDIATOR	0.0171762	0.0923735
GTEx	hypertension	B_HTN	C5	GOBP	GOBP_REGULATION_OF_ANDROGEN_RECEPTOR_SIGNALING_PATHWAY	0.0171762	0.0923735
GTEx	hypertension	B_HTN	C5	GOBP	GOBP_MUSCLE_ORGAN_DEVELOPMENT	0.0172833	0.0923735
GTEx	hypertension	B_HTN	C5	GOMF	GOMF_CADHERIN_BINDING	0.0173814	0.0923735
GTEx	hypertension	B_HTN	C5	GOBP	GOBP_REGULATION_OF_CAMP_MEDIATED_SIGNALING	0.0177846	0.0923735
GTEx	hypertension	B_HTN	C5	GOBP	GOBP_REGULATION_OF_CELLULAR_COMPONENT_SIZE	0.0189848	0.0923735
GTEx	hypertension	B_HTN	C5	GOBP	GOBP_POSITIVE_REGULATION_OF_POSTTRANSCRIPTIONAL_GENE_SILENCING	0.0190003	0.0923735
GTEx	hypertension	B_HTN	C5	GOBP	GOBP_REGULATION_OF_SMAD_PROTEIN_SIGNAL_TRANSDUCTION	0.0190003	0.0923735
GTEx	hypertension	B_HTN	C5	GOCC	GOCC_INTEGRIN_COMPLEX	0.0190003	0.0923735
GTEx	hypertension	B_HTN	C5	GOBP	GOBP_NEGATIVE_REGULATION_OF_ERBB_SIGNALING_PATHWAY	0.0196077	0.0923735
GTEx	hypertension	B_HTN	C5	GOBP	GOBP_NEGATIVE_REGULATION_OF_SMOOTHENED_SIGNALING_PATHWAY	0.0202147	0.0923735
GTEx	hypertension	B_HTN	C5	GOBP	GOBP_POSITIVE_REGULATION_OF_INTERLEUKIN_2_PRODUCTION	0.0208214	0.0923735
GTEx	hypertension	B_HTN	C5	GOCC	GOCC_A_BAND	0.0208214	0.0923735
GTEx	hypertension	B_HTN	C5	GOBP	GOBP_TRANSMEMBRANE_RECEPTOR_PROTEIN_SERINE_THREONINE_KINASE_SIGNALING_PATHWAY	0.0213964	0.0923735
GTEx	hypertension	B_HTN	C5	GOBP	GOBP_REGULATION_OF_SUPRAMOLECULAR_FIBER_ORGANIZATION	0.021504	0.0923735
GTEx	hypertension	B_HTN	C5	GOBP	GOBP_POSITIVE_REGULATION_OF_PHOSPHATASE_ACTIVITY	0.0220337	0.0923735
GTEx	hypertension	B_HTN	C5	GOBP	GOBP_REGULATION_OF_DNA_DAMAGE_RESPONSE_SIGNAL_TRANSDUCTION_BY_P53_CLASS_MEDIATOR	0.0220337	0.0923735
GTEx	hypertension	B_HTN	C5	GOBP	GOBP_RIBONUCLEOSIDE_METABOLIC_PROCESS	0.0220337	0.0923735
GTEx	hypertension	B_HTN	C5	GOBP	GOBP_PROTEIN_ADP_RIBOSYLATION	0.0226394	0.0923735
GTEx	hypertension	B_HTN	C5	GOBP	GOBP_REGULATION_OF_ACTIN_FILAMENT_BASED_PROCESS	0.0234813	0.0938024
GTEx	hypertension	B_HTN	C5	GOMF	GOMF_CATALYTIC_ACTIVITY_ACTING_ON_RNA	0.0238181	0.094652
GTEx	hypertension	B_HTN	C5	GOBP	GOBP_MRNA_TRANSCRIPTION	0.0250585	0.0959826
GTEx	hypertension	B_HTN	C5	GOMF	GOMF_LIGASE_ACTIVITY_FORMING_CARBON_OXYGEN_BONDS	0.0250585	0.0959826
GTEx	hypertension	B_HTN	C5	GOBP	GOBP_GOLGI_TO_PLASMA_MEMBRANE_PROTEIN_TRANSPORT	0.0256625	0.0959826
GTEx	hypertension	B_HTN	C5	GOMF	GOMF_STRUCTURAL_CONSTITUENT_OF_MUSCLE	0.0256625	0.0959826
GTEx	hypertension	B_HTN	C5	GOCC	GOCC_PROTEIN_COMPLEX_INVOLVED_IN_CELL_ADHESION	0.026266	0.0969277
GTEx	hypertension	B_HTN	C5	GOBP	GOBP_DEPHOSPHORYLATION	0.0272963	0.0969277
GTEx	hypertension	B_HTN	C5	GOBP	GOBP_AMINO_ACID_ACTIVATION	0.0274722	0.0969277
GTEx	hypertension	B_HTN	C5	GOBP	GOBP_NEGATIVE_REGULATION_OF_ACTIN_FILAMENT_DEPOLYMERIZATION	0.0274722	0.0969277
GTEx	hypertension	B_HTN	C5	GOBP	GOBP_PURINE_NUCLEOSIDE_MONOPHOSPHATE_METABOLIC_PROCESS	0.0274722	0.0969277
GTEx	hypertension	B_HTN	C5	GOCC	GOCC_CELL_SUBSTRATE_JUNCTION	0.0280157	0.0969277
GTEx	hypertension	B_HTN	C5	GOBP	GOBP_ANDROGEN_RECEPTOR_SIGNALING_PATHWAY	0.0280747	0.0969277
GTEx	hypertension	B_HTN	C5	GOBP	GOBP_POSITIVE_REGULATION_OF_PROTEIN_DEPHOSPHORYLATION	0.0280747	0.0969277
GTEx	hypertension	B_HTN	C5	GOBP	GOBP_PURINE_NUCLEOTIDE_CATABOLIC_PROCESS	0.0280747	0.0969277
GTEx	hypertension	B_HTN	C5	GOBP	GOBP_RIBONUCLEOTIDE_CATABOLIC_PROCESS	0.028677	0.0981189
GTEx	hypertension	B_HTN	C5	GOBP	GOBP_VASODILATION	0.0292788	0.098413
GTEx	hypertension	B_HTN	C5	GOBP	GOBP_CAMP_MEDIATED_SIGNALING	0.0304816	0.0988161
GTEx	hypertension	B_HTN	C5	GOBP	GOBP_REGULATION_OF_GENE_SILENCING_BY_RNA	0.0304816	0.0988161
GTEx	hypertension	B_HTN	C5	GOBP	GOBP_PURINE_CONTAINING_COMPOUND_CATABOLIC_PROCESS	0.0310824	0.0988161
GTEx	hypertension	B_HTN	C5	GOBP	GOBP_CELLULAR_NITROGEN_COMPOUND_CATABOLIC_PROCESS	0.0314752	0.099074
GTEx	hypertension	B_HTN	C5	GOBP	GOBP_POSITIVE_REGULATION_OF_NEURON_APOPTOTIC_PROCESS	0.0316829	0.099074
GTEx	hypertension	B_HTN	C5	GOBP	GOBP_POSITIVE_REGULATION_OF_ACTIN_FILAMENT_POLYMERIZATION	0.0322831	0.0997498
GTEx	hypertension	B_HTN	C5	GOMF	GOMF_PHOSPHOLIPID_BINDING	0.0327507	0.0997498
GTEx	hypertension	B_HTN	C5	GOBP	GOBP_INTRACELLULAR_ESTROGEN_RECEPTOR_SIGNALING_PATHWAY	0.0328829	0.0997498
GTEx	hypertension	B_HTN	C5	GOMF	GOMF_CELL_CELL_ADHESION_MEDIATOR_ACTIVITY	0.0328829	0.0997498
GTEx	hypertension	B_HTN	C5	GOBP	GOBP_NEGATIVE_REGULATION_OF_G_PROTEIN_COUPLED_RECEPTOR_SIGNALING_PATHWAY	0.0334824	0.0997498
GTEx	hypertension	B_HTN	C5	GOBP	GOBP_DSRNA_PROCESSING	0.0340815	0.0997498
GTEx	hypertension	B_HTN	C5	GOMF	GOMF_PRE_MRNA_BINDING	0.0340815	0.0997498
GTEx	hypertension	B_HTN	C5	GOMF	GOMF_CALCIUM_DEPENDENT_PHOSPHOLIPID_BINDING	0.0346803	0.0997498
GTEx	hypertension	B_HTN	C5	GOCC	GOCC_NEURON_PROJECTION_MEMBRANE	0.0352788	0.0997498
GTEx	hypertension	B_HTN	C5	GOBP	GOBP_ACTIN_FILAMENT_DEPOLYMERIZATION	0.0358769	0.0997498
GTEx	hypertension	B_HTN	C5	GOBP	GOBP_REGULATION_OF_PHOSPHOPROTEIN_PHOSPHATASE_ACTIVITY	0.0358769	0.0997498
GTEx	hypertension	B_HTN	C5	GOBP	GOBP_POSITIVE_REGULATION_OF_CELLULAR_COMPONENT_BIOGENESIS	0.0360295	0.0997498
GTEx	hypertension	B_HTN	C5	GOCC	GOCC_ACTIN_CYTOSKELETON	0.0360295	0.0997498
GTEx	hypertension	B_HTN	C5	GOBP	GOBP_REGULATION_OF_ALTERNATIVE_MRNA_SPLICING_VIA_SPLICEOSOME	0.0364747	0.0997498
GTEx	hypertension	B_HTN	C5	GOBP	GOBP_REGULATION_OF_MIRNA_TRANSCRIPTION	0.0364747	0.0997498
GTEx	hypertension	B_HTN	C5	GOBP	GOBP_RIBONUCLEOSIDE_MONOPHOSPHATE_METABOLIC_PROCESS	0.0364747	0.0997498
GTEx	hypertension	B_HTN	C5	GOBP	GOBP_POSITIVE_REGULATION_OF_DEPHOSPHORYLATION	0.0370721	0.0999896
GTEx	hypertension	B_HTN	C5	GOCC	GOCC_MAIN_AXON	0.0370721	0.0999896
GTEx	hypertension	B_HTN	C5	GOBP	GOBP_ENDOSOME_TO_LYSOSOME_TRANSPORT	0.0376692	0.0999896
GTEx	hypertension	B_HTN	C5	GOBP	GOBP_GOLGI_TO_PLASMA_MEMBRANE_TRANSPORT	0.0376692	0.0999896
GTEx	hypertension	B_HTN	C5	GOBP	GOBP_MEMBRANE_BIOGENESIS	0.0376692	0.0999896
GTEx	hypertension	B_HTN	C5	GOMF	GOMF_PROMOTER_SPECIFIC_CHROMATIN_BINDING	0.0376692	0.0999896
GTEx	hypertension	B_HTN	C5	GOBP	GOBP_ESTABLISHMENT_OF_PROTEIN_LOCALIZATION_TO_PLASMA_MEMBRANE	0.038266	0.0999896
GTEx	hypertension	B_HTN	C5	GOBP	GOBP_INTERLEUKIN_2_PRODUCTION	0.038266	0.0999896
GTEx	hypertension	B_HTN	C5	GOBP	GOBP_NUCLEOSIDE_METABOLIC_PROCESS	0.038266	0.0999896
GTEx	hyperlipidemia	B_LIP	C5	GOBP	GOBP_REGULATION_OF_ANTIGEN_PROCESSING_AND_PRESENTATION_OF_PEPTIDE_OR_POLYSACCHARIDE_ANTIGEN_VIA_MHC_CLASS_II	0.000772519	0.0148316
GTEx	hyperlipidemia	B_LIP	C5	GOMF	GOMF_PROTEIN_SEQUESTERING_ACTIVITY	0.000772519	0.0148316
GTEx	hyperlipidemia	B_LIP	C5	GOMF	GOMF_TUMOR_NECROSIS_FACTOR_BINDING	0.000772519	0.0148316
GTEx	hyperlipidemia	B_LIP	C5	GOBP	GOBP_REGULATION_OF_ANTIGEN_PROCESSING_AND_PRESENTATION_OF_PEPTIDE_ANTIGEN	0.000926975	0.0148316
GTEx	hyperlipidemia	B_LIP	C5	GOMF	GOMF_MOLECULAR_SEQUESTERING_ACTIVITY	0.000926975	0.0148316
GTEx	hyperlipidemia	B_LIP	C5	GOBP	GOBP_NEGATIVE_REGULATION_OF_ANTIGEN_PROCESSING_AND_PRESENTATION	0.00139025	0.017653
GTEx	hyperlipidemia	B_LIP	C5	GOMF	GOMF_MHC_CLASS_II_RECEPTOR_ACTIVITY	0.00154464	0.017653
GTEx	hyperlipidemia	B_LIP	C5	GOBP	GOBP_PEPTIDE_ANTIGEN_ASSEMBLY_WITH_MHC_CLASS_II_PROTEIN_COMPLEX	0.00247066	0.0185194
GTEx	hyperlipidemia	B_LIP	C5	GOCC	GOCC_MHC_CLASS_II_PROTEIN_COMPLEX	0.00262494	0.0185194
GTEx	hyperlipidemia	B_LIP	C5	GOMF	GOMF_MECHANOSENSITIVE_ION_CHANNEL_ACTIVITY	0.00262494	0.0185194
GTEx	hyperlipidemia	B_LIP	C5	GOBP	GOBP_PEPTIDE_ANTIGEN_ASSEMBLY_WITH_MHC_PROTEIN_COMPLEX	0.00308769	0.0185194
GTEx	hyperlipidemia	B_LIP	C5	GOBP	GOBP_REGULATION_OF_ANTIGEN_PROCESSING_AND_PRESENTATION	0.00308769	0.0185194
GTEx	hyperlipidemia	B_LIP	C5	GOCC	GOCC_MHC_PROTEIN_COMPLEX	0.00401275	0.0185194
GTEx	hyperlipidemia	B_LIP	C5	GOMF	GOMF_MHC_CLASS_II_PROTEIN_COMPLEX_BINDING	0.00416688	0.0185194
GTEx	hyperlipidemia	B_LIP	C5	GOBP	GOBP_ANTIGEN_PROCESSING_AND_PRESENTATION_OF_EXOGENOUS_PEPTIDE_ANTIGEN_VIA_MHC_CLASS_II	0.00462915	0.0193157
GTEx	hyperlipidemia	B_LIP	C5	GOBP	GOBP_ANTIGEN_PROCESSING_AND_PRESENTATION_OF_PEPTIDE_OR_POLYSACCHARIDE_ANTIGEN_VIA_MHC_CLASS_II	0.00555326	0.0193157
GTEx	hyperlipidemia	B_LIP	C5	GOMF	GOMF_MHC_PROTEIN_COMPLEX_BINDING	0.00555326	0.0193157
GTEx	hyperlipidemia	B_LIP	C5	GOBP	GOBP_ANTIGEN_PROCESSING_AND_PRESENTATION_OF_EXOGENOUS_PEPTIDE_ANTIGEN	0.00586117	0.0195372
GTEx	hyperlipidemia	B_LIP	C5	GOBP	GOBP_ZINC_ION_HOMEOSTASIS	0.00632291	0.0202333
GTEx	hyperlipidemia	B_LIP	C5	GOBP	GOBP_ANTIGEN_PROCESSING_AND_PRESENTATION_OF_EXOGENOUS_ANTIGEN	0.00724598	0.0220208
GTEx	hyperlipidemia	B_LIP	C5	GOBP	GOBP_REGULATION_OF_EXTRINSIC_APOPTOTIC_SIGNALING_PATHWAY_VIA_DEATH_DOMAIN_RECEPTORS	0.00770729	0.0220208
GTEx	hyperlipidemia	B_LIP	C5	GOBP	GOBP_ANTIGEN_PROCESSING_AND_PRESENTATION_OF_PEPTIDE_ANTIGEN	0.00970468	0.0250443
GTEx	hyperlipidemia	B_LIP	C5	GOBP	GOBP_IMMUNOGLOBULIN_PRODUCTION_INVOLVED_IN_IMMUNOGLOBULIN_MEDIATED_IMMUNE_RESPONSE	0.0112393	0.0272468
GTEx	hyperlipidemia	B_LIP	C5	GOBP	GOBP_EXTRINSIC_APOPTOTIC_SIGNALING_PATHWAY_VIA_DEATH_DOMAIN_RECEPTORS	0.0130788	0.0307736
GTEx	hyperlipidemia	B_LIP	C5	GOBP	GOBP_NEGATIVE_REGULATION_OF_PROTEIN_BINDING	0.0149159	0.0331465
GTEx	hyperlipidemia	B_LIP	C5	GOBP	GOBP_ANTIGEN_PROCESSING_AND_PRESENTATION	0.0164452	0.0346214
GTEx	hyperlipidemia	B_LIP	C5	GOBP	GOBP_TRANSITION_METAL_ION_HOMEOSTASIS	0.0213281	0.0407988
GTEx	hyperlipidemia	B_LIP	C5	GOMF	GOMF_CYTOKINE_BINDING	0.021785	0.0407988
GTEx	hyperlipidemia	B_LIP	C5	GOBP	GOBP_NEGATIVE_REGULATION_OF_PROTEIN_CONTAINING_COMPLEX_ASSEMBLY	0.0222419	0.0407988
GTEx	hyperlipidemia	B_LIP	C5	GOMF	GOMF_IMMUNE_RECEPTOR_ACTIVITY	0.0226985	0.0407988
GTEx	hyperlipidemia	B_LIP	C5	GOBP	GOBP_REGULATION_OF_EXTRINSIC_APOPTOTIC_SIGNALING_PATHWAY	0.0234593	0.0407988
GTEx	hyperlipidemia	B_LIP	C5	GOBP	GOBP_NEGATIVE_REGULATION_OF_BINDING	0.0254355	0.0423925
GTEx	hyperlipidemia	B_LIP	C5	GOBP	GOBP_REGULATION_OF_PROTEIN_BINDING	0.0301372	0.0482195
GTEx	hyperlipidemia	B_LIP	C5	GOBP	GOBP_B_CELL_MEDIATED_IMMUNITY	0.0324067	0.0498565
GTEx	hyperlipidemia	B_LIP	C5	GOBP	GOBP_IMMUNOGLOBULIN_PRODUCTION	0.0333136	0.0500248
GTEx	hyperlipidemia	B_LIP	C5	GOBP	GOBP_EXTRINSIC_APOPTOTIC_SIGNALING_PATHWAY	0.0337668	0.0500248
GTEx	hyperlipidemia	B_LIP	C5	GOBP	GOBP_POSITIVE_REGULATION_OF_LEUKOCYTE_CELL_CELL_ADHESION	0.0373873	0.0543815
GTEx	hyperlipidemia	B_LIP	C5	GOBP	GOBP_POSITIVE_REGULATION_OF_CELL_CELL_ADHESION	0.0443014	0.0611054
GTEx	hyperlipidemia	B_LIP	C5	GOCC	GOCC_NUCLEAR_MEMBRANE	0.0456503	0.0618986
GTEx	hyperlipidemia	B_LIP	C5	GOBP	GOBP_PRODUCTION_OF_MOLECULAR_MEDIATOR_OF_IMMUNE_RESPONSE	0.0475964	0.0634618
GTEx	hyperlipidemia	B_LIP	C5	GOMF	GOMF_DNA_BINDING_TRANSCRIPTION_REPRESSOR_ACTIVITY	0.0493905	0.0647744
GTEx	hyperlipidemia	B_LIP	C5	GOBP	GOBP_REGULATION_OF_T_CELL_ACTIVATION	0.0519282	0.0649102
GTEx	hyperlipidemia	B_LIP	C5	GOMF	GOMF_GATED_CHANNEL_ACTIVITY	0.0519282	0.0649102
GTEx	hyperlipidemia	B_LIP	C5	GOBP	GOBP_LYMPHOCYTE_MEDIATED_IMMUNITY	0.0541636	0.0654729
GTEx	hyperlipidemia	B_LIP	C5	GOBP	GOBP_ADAPTIVE_IMMUNE_RESPONSE_BASED_ON_SOMATIC_RECOMBINATION_OF_IMMUNE_RECEPTORS_BUILT_FROM_IMMUNOGLOBULIN_SUPERFAMILY_DOMAINS	0.0550568	0.0654729
GTEx	hyperlipidemia	B_LIP	C5	GOBP	GOBP_REGULATION_OF_APOPTOTIC_SIGNALING_PATHWAY	0.055652	0.0654729
GTEx	hyperlipidemia	B_LIP	C5	GOBP	GOBP_REGULATION_OF_BINDING	0.055652	0.0654729
GTEx	hyperlipidemia	B_LIP	C5	GOBP	GOBP_LEUKOCYTE_CELL_CELL_ADHESION	0.057733	0.0669368
GTEx	hyperlipidemia	B_LIP	C5	GOBP	GOBP_REGULATION_OF_PROTEIN_CONTAINING_COMPLEX_ASSEMBLY	0.0607006	0.0693721
GTEx	hyperlipidemia	B_LIP	C5	GOBP	GOBP_NEGATIVE_REGULATION_OF_IMMUNE_SYSTEM_PROCESS	0.0642535	0.0718173
GTEx	hyperlipidemia	B_LIP	C5	GOBP	GOBP_POSITIVE_REGULATION_OF_CELL_ACTIVATION	0.0648448	0.0718173
GTEx	hyperlipidemia	B_LIP	C5	GOBP	GOBP_POSITIVE_REGULATION_OF_CELL_ADHESION	0.0673549	0.0718173
GTEx	hyperlipidemia	B_LIP	C5	GOBP	GOBP_LEUKOCYTE_MEDIATED_IMMUNITY	0.0680924	0.0718173
GTEx	hyperlipidemia	B_LIP	C5	GOCC	GOCC_VACUOLAR_MEMBRANE	0.0682398	0.0718173
GTEx	hyperlipidemia	B_LIP	C5	GOBP	GOBP_REGULATION_OF_CELL_CELL_ADHESION	0.0691241	0.0718173
GTEx	hyperlipidemia	B_LIP	C5	GOCC	GOCC_NUCLEAR_ENVELOPE	0.0722148	0.0733904
GTEx	hyperlipidemia	B_LIP	C5	GOMF	GOMF_PASSIVE_TRANSMEMBRANE_TRANSPORTER_ACTIVITY	0.0730966	0.0733904
GTEx	hyperlipidemia	B_LIP	C5	GOBP	GOBP_CELL_GROWTH	0.0733904	0.0733904
Korean	thyroid disease	B_THY	C2	CP_KEGG	KEGG_ASTHMA	0.0114078	0.0427526
Korean	thyroid disease	B_THY	C2	CP_KEGG	KEGG_ALLOGRAFT_REJECTION	0.0140602	0.0427526
Korean	thyroid disease	B_THY	C2	CP_KEGG	KEGG_GRAFT_VERSUS_HOST_DISEASE	0.0155743	0.0427526
Korean	thyroid disease	B_THY	C2	CP_KEGG	KEGG_TYPE_I_DIABETES_MELLITUS	0.0163309	0.0427526
Korean	thyroid disease	B_THY	C2	CP_KEGG	KEGG_INTESTINAL_IMMUNE_NETWORK_FOR_IGA_PRODUCTION	0.0182211	0.0427526
Korean	thyroid disease	B_THY	C2	CP_KEGG	KEGG_AUTOIMMUNE_THYROID_DISEASE	0.019732	0.0427526
Korean	thyroid disease	B_THY	C2	CP_KEGG	KEGG_VIRAL_MYOCARDITIS	0.0265165	0.0432606
Korean	thyroid disease	B_THY	C2	CP_KEGG	KEGG_LEISHMANIA_INFECTION	0.0272689	0.0432606
Korean	thyroid disease	B_THY	C2	CP_KEGG	KEGG_HEMATOPOIETIC_CELL_LINEAGE	0.0329024	0.0432606
Korean	thyroid disease	B_THY	C2	CP_KEGG	KEGG_ANTIGEN_PROCESSING_AND_PRESENTATION	0.0332774	0.0432606
Korean	thyroid disease	B_THY	C2	CP_KEGG	KEGG_SPLICEOSOME	0.0478453	0.0523055
Korean	thyroid disease	B_THY	C2	CP_KEGG	KEGG_CELL_ADHESION_MOLECULES_CAMS	0.0500767	0.0523055
Korean	thyroid disease	B_THY	C2	CP_KEGG	KEGG_SYSTEMIC_LUPUS_ERYTHEMATOSUS	0.0523055	0.0523055
Korean	hyperlipidemia	B_LIP	C2	CP_REACTOME	REACTOME_CHYLOMICRON_CLEARANCE	0.00187758	0.0206534
Korean	hyperlipidemia	B_LIP	C2	CP_REACTOME	REACTOME_PLATELET_ADHESION_TO_EXPOSED_COLLAGEN	0.00562481	0.0239939
Korean	hyperlipidemia	B_LIP	C2	CP_REACTOME	REACTOME_ASSEMBLY_OF_ACTIVE_LPL_AND_LIPC_LIPASE_COMPLEXES	0.00712074	0.0239939
Korean	hyperlipidemia	B_LIP	C2	CP_REACTOME	REACTOME_PLASMA_LIPOPROTEIN_CLEARANCE	0.0123432	0.0239939
Korean	hyperlipidemia	B_LIP	C2	CP_REACTOME	REACTOME_PLASMA_LIPOPROTEIN_REMODELING	0.0127155	0.0239939
Korean	hyperlipidemia	B_LIP	C2	CP_REACTOME	REACTOME_GPVI_MEDIATED_ACTIVATION_CASCADE	0.0130876	0.0239939
Korean	hyperlipidemia	B_LIP	C2	CP_REACTOME	REACTOME_PLASMA_LIPOPROTEIN_ASSEMBLY_REMODELING_AND_CLEARANCE	0.0264147	0.0415088
Korean	hyperlipidemia	B_LIP	C2	CP_REACTOME	REACTOME_MHC_CLASS_II_ANTIGEN_PRESENTATION	0.0465143	0.0639572
Korean	hyperlipidemia	B_LIP	C2	CP_REACTOME	REACTOME_IMMUNOREGULATORY_INTERACTIONS_BETWEEN_A_LYMPHOID_AND_A_NON_LYMPHOID_CELL	0.0698653	0.0780259
Korean	hyperlipidemia	B_LIP	C2	CP_REACTOME	REACTOME_CELL_SURFACE_INTERACTIONS_AT_THE_VASCULAR_WALL	0.0709326	0.0780259
Korean	hyperlipidemia	B_LIP	C2	CP_REACTOME	REACTOME_PLATELET_ACTIVATION_SIGNALING_AND_AGGREGATION	0.0945301	0.0945301
Korean	thyroid disease	B_THY	C2	CP_REACTOME	REACTOME_RHOBTB2_GTPASE_CYCLE	0.00646792	0.038328
Korean	thyroid disease	B_THY	C2	CP_REACTOME	REACTOME_PD_1_SIGNALING	0.00787029	0.038328
Korean	thyroid disease	B_THY	C2	CP_REACTOME	REACTOME_RHOBTB_GTPASE_CYCLE	0.00983139	0.038328
Korean	thyroid disease	B_THY	C2	CP_REACTOME	REACTOME_GENERATION_OF_SECOND_MESSENGER_MOLECULES	0.0109509	0.038328
Korean	thyroid disease	B_THY	C2	CP_REACTOME	REACTOME_RNA_POLYMERASE_II_TRANSCRIPTION_TERMINATION	0.0184852	0.0454671
Korean	thyroid disease	B_THY	C2	CP_REACTOME	REACTOME_COSTIMULATION_BY_THE_CD28_FAMILY	0.0207102	0.0454671
Korean	thyroid disease	B_THY	C2	CP_REACTOME	REACTOME_TRANSPORT_OF_MATURE_TRANSCRIPT_TO_CYTOPLASM	0.0234868	0.0454671
Korean	thyroid disease	B_THY	C2	CP_REACTOME	REACTOME_INTERFERON_GAMMA_SIGNALING	0.0259812	0.0454671
Korean	thyroid disease	B_THY	C2	CP_REACTOME	REACTOME_TCR_SIGNALING	0.0345405	0.0491274
Korean	thyroid disease	B_THY	C2	CP_REACTOME	REACTOME_MHC_CLASS_II_ANTIGEN_PRESENTATION	0.035091	0.0491274
Korean	thyroid disease	B_THY	C2	CP_REACTOME	REACTOME_INTERFERON_SIGNALING	0.0561259	0.071433
Korean	thyroid disease	B_THY	C2	CP_REACTOME	REACTOME_PROCESSING_OF_CAPPED_INTRON_CONTAINING_PRE_MRNA	0.0666623	0.0777727
Korean	thyroid disease	B_THY	C2	CP_REACTOME	REACTOME_G_ALPHA_I_SIGNALLING_EVENTS	0.0859076	0.0925159
Korean	type 2 diabetes	B_DM	C2	CP_WIKIPATHWAYS	WP_RENINANGIOTENSINALDOSTERONE_SYSTEM_RAAS	0.0113306	0.0226612
Korean	type 2 diabetes	B_DM	C2	CP_WIKIPATHWAYS	WP_MESODERMAL_COMMITMENT_PATHWAY	0.0396278	0.0396278
Korean	hyperlipidemia	B_LIP	C2	CP_WIKIPATHWAYS	WP_ALLOGRAFT_REJECTION	0.000771808	0.0108053
Korean	hyperlipidemia	B_LIP	C2	CP_WIKIPATHWAYS	WP_FAMILIAL_HYPERLIPIDEMIA_TYPE_3	0.00721228	0.0216201
Korean	hyperlipidemia	B_LIP	C2	CP_WIKIPATHWAYS	WP_FAMILIAL_HYPERLIPIDEMIA_TYPE_5	0.00772595	0.0216201
Korean	hyperlipidemia	B_LIP	C2	CP_WIKIPATHWAYS	WP_FAMILIAL_HYPERLIPIDEMIA_TYPE_2	0.00875268	0.0216201
Korean	hyperlipidemia	B_LIP	C2	CP_WIKIPATHWAYS	WP_METABOLIC_PATHWAY_OF_LDL_HDL_AND_TG_INCLUDING_DISEASES	0.00875268	0.0216201
Korean	hyperlipidemia	B_LIP	C2	CP_WIKIPATHWAYS	WP_FAMILIAL_HYPERLIPIDEMIA_TYPE_1	0.00926575	0.0216201
Korean	hyperlipidemia	B_LIP	C2	CP_WIKIPATHWAYS	WP_FAMILIAL_HYPERLIPIDEMIA_TYPE_4	0.011316	0.0222063
Korean	hyperlipidemia	B_LIP	C2	CP_WIKIPATHWAYS	WP_TRIACYLGLYCERIDE_SYNTHESIS	0.0133631	0.0222063
Korean	hyperlipidemia	B_LIP	C2	CP_WIKIPATHWAYS	WP_INTERACTIONS_OF_NATURAL_KILLER_CELLS_IN_PANCREATIC_CANCER	0.0143855	0.0222063
Korean	hyperlipidemia	B_LIP	C2	CP_WIKIPATHWAYS	WP_STATIN_INHIBITION_OF_CHOLESTEROL_PRODUCTION	0.0169379	0.0222063
Korean	hyperlipidemia	B_LIP	C2	CP_WIKIPATHWAYS	WP_FATTY_ACID_BETAOXIDATION	0.0174478	0.0222063
Korean	hyperlipidemia	B_LIP	C2	CP_WIKIPATHWAYS	WP_HEMATOPOIETIC_STEM_CELL_DIFFERENTIATION	0.0316443	0.0369183
Korean	hyperlipidemia	B_LIP	C2	CP_WIKIPATHWAYS	WP_ACUTE_VIRAL_MYOCARDITIS	0.0441892	0.0475884
Korean	hyperlipidemia	B_LIP	C2	CP_WIKIPATHWAYS	WP_EBOLA_VIRUS_INFECTION_IN_HOST	0.0659718	0.0659718
Korean	thyroid disease	B_THY	C2	CP_WIKIPATHWAYS	WP_PATHOGENESIS_OF_SARSCOV2_MEDIATED_BY_NSP9NSP10_COMPLEX	0.00271143	0.00895201
Korean	thyroid disease	B_THY	C2	CP_WIKIPATHWAYS	WP_PI3KAKTMTOR_VITD3_SIGNALING	0.00284054	0.00895201
Korean	thyroid disease	B_THY	C2	CP_WIKIPATHWAYS	WP_CYTOKINES_AND_INFLAMMATORY_RESPONSE	0.003357	0.00895201
Korean	thyroid disease	B_THY	C2	CP_WIKIPATHWAYS	WP_TCELL_ACTIVATION_SARSCOV2	0.0112331	0.0183861
Korean	thyroid disease	B_THY	C2	CP_WIKIPATHWAYS	WP_ALLOGRAFT_REJECTION	0.0114913	0.0183861
Korean	thyroid disease	B_THY	C2	CP_WIKIPATHWAYS	WP_EBOLA_VIRUS_INFECTION_IN_HOST	0.0169141	0.0225522
Korean	thyroid disease	B_THY	C2	CP_WIKIPATHWAYS	WP_MALE_INFERTILITY	0.0200129	0.0228719
Korean	thyroid disease	B_THY	C2	CP_WIKIPATHWAYS	WP_NETWORK_MAP_OF_SARSCOV2_SIGNALING_PATHWAY	0.0285345	0.0285345
GTEx	type 2 diabetes	B_DM	C2	CP_KEGG	KEGG_INOSITOL_PHOSPHATE_METABOLISM	0.0102955	0.0356292
GTEx	type 2 diabetes	B_DM	C2	CP_KEGG	KEGG_LONG_TERM_DEPRESSION	0.013346	0.0356292
GTEx	type 2 diabetes	B_DM	C2	CP_KEGG	KEGG_LONG_TERM_POTENTIATION	0.013346	0.0356292
GTEx	type 2 diabetes	B_DM	C2	CP_KEGG	KEGG_PHOSPHATIDYLINOSITOL_SIGNALING_SYSTEM	0.01449	0.0356292
GTEx	type 2 diabetes	B_DM	C2	CP_KEGG	KEGG_GAP_JUNCTION	0.0171592	0.0356292
GTEx	type 2 diabetes	B_DM	C2	CP_KEGG	KEGG_GNRH_SIGNALING_PATHWAY	0.0192564	0.0356292
GTEx	type 2 diabetes	B_DM	C2	CP_KEGG	KEGG_MELANOGENESIS	0.0192564	0.0356292
GTEx	type 2 diabetes	B_DM	C2	CP_KEGG	KEGG_VASCULAR_SMOOTH_MUSCLE_CONTRACTION	0.0219256	0.0356292
GTEx	type 2 diabetes	B_DM	C2	CP_KEGG	KEGG_WNT_SIGNALING_PATHWAY	0.0287893	0.0360343
GTEx	type 2 diabetes	B_DM	C2	CP_KEGG	KEGG_ALZHEIMERS_DISEASE	0.0316492	0.0360343
GTEx	type 2 diabetes	B_DM	C2	CP_KEGG	KEGG_CALCIUM_SIGNALING_PATHWAY	0.0339371	0.0360343
GTEx	type 2 diabetes	B_DM	C2	CP_KEGG	KEGG_HUNTINGTONS_DISEASE	0.0346997	0.0360343
GTEx	type 2 diabetes	B_DM	C2	CP_KEGG	KEGG_CHEMOKINE_SIGNALING_PATHWAY	0.0360343	0.0360343
GTEx	hypertension	B_HTN	C2	CP_KEGG	KEGG_HYPERTROPHIC_CARDIOMYOPATHY_HCM	0.00356141	0.0313232
GTEx	hypertension	B_HTN	C2	CP_KEGG	KEGG_DILATED_CARDIOMYOPATHY	0.00417643	0.0313232
GTEx	hyperlipidemia	B_LIP	C2	CP_KEGG	KEGG_ASTHMA	0.00571973	0.018176
GTEx	hyperlipidemia	B_LIP	C2	CP_KEGG	KEGG_ALLOGRAFT_REJECTION	0.00705434	0.018176
GTEx	hyperlipidemia	B_LIP	C2	CP_KEGG	KEGG_GRAFT_VERSUS_HOST_DISEASE	0.00781697	0.018176
GTEx	hyperlipidemia	B_LIP	C2	CP_KEGG	KEGG_TYPE_I_DIABETES_MELLITUS	0.00819828	0.018176
GTEx	hyperlipidemia	B_LIP	C2	CP_KEGG	KEGG_INTESTINAL_IMMUNE_NETWORK_FOR_IGA_PRODUCTION	0.00915157	0.018176
GTEx	hyperlipidemia	B_LIP	C2	CP_KEGG	KEGG_AUTOIMMUNE_THYROID_DISEASE	0.0099142	0.018176
GTEx	hyperlipidemia	B_LIP	C2	CP_KEGG	KEGG_VIRAL_MYOCARDITIS	0.013346	0.0188751
GTEx	hyperlipidemia	B_LIP	C2	CP_KEGG	KEGG_LEISHMANIA_INFECTION	0.0137274	0.0188751
GTEx	hyperlipidemia	B_LIP	C2	CP_KEGG	KEGG_ANTIGEN_PROCESSING_AND_PRESENTATION	0.0167779	0.0205063
GTEx	hyperlipidemia	B_LIP	C2	CP_KEGG	KEGG_CELL_ADHESION_MOLECULES_CAMS	0.0253575	0.0265014
GTEx	hyperlipidemia	B_LIP	C2	CP_KEGG	KEGG_SYSTEMIC_LUPUS_ERYTHEMATOSUS	0.0265014	0.0265014
GTEx	type 2 diabetes	B_DM	C2	CP_REACTOME	REACTOME_FATTY_ACIDS_BOUND_TO_GPR40_FFAR1_REGULATE_INSULIN_SECRETION	0.00225289	0.0209037
GTEx	type 2 diabetes	B_DM	C2	CP_REACTOME	REACTOME_SERINE_BIOSYNTHESIS	0.00253426	0.0209037
GTEx	type 2 diabetes	B_DM	C2	CP_REACTOME	REACTOME_ACETYLCHOLINE_REGULATES_INSULIN_SECRETION	0.00281558	0.0209037
GTEx	type 2 diabetes	B_DM	C2	CP_REACTOME	REACTOME_FREE_FATTY_ACIDS_REGULATE_INSULIN_SECRETION	0.00309684	0.0209037
GTEx	type 2 diabetes	B_DM	C2	CP_REACTOME	REACTOME_PRESYNAPTIC_FUNCTION_OF_KAINATE_RECEPTORS	0.0059066	0.0303454
GTEx	type 2 diabetes	B_DM	C2	CP_REACTOME	REACTOME_SYNTHESIS_OF_IP3_AND_IP4_IN_THE_CYTOSOL	0.0073095	0.0303454
GTEx	type 2 diabetes	B_DM	C2	CP_REACTOME	REACTOME_ACTIVATION_OF_KAINATE_RECEPTORS_UPON_GLUTAMATE_BINDING	0.00843087	0.0303454
GTEx	type 2 diabetes	B_DM	C2	CP_REACTOME	REACTOME_G_PROTEIN_BETA_GAMMA_SIGNALLING	0.00899124	0.0303454
GTEx	type 2 diabetes	B_DM	C2	CP_REACTOME	REACTOME_INOSITOL_PHOSPHATE_METABOLISM	0.0134666	0.0371651
GTEx	type 2 diabetes	B_DM	C2	CP_REACTOME	REACTOME_FORMATION_OF_TC_NER_PRE_INCISION_COMPLEX	0.0148623	0.0371651
GTEx	type 2 diabetes	B_DM	C2	CP_REACTOME	REACTOME_G_PROTEIN_MEDIATED_EVENTS	0.0151413	0.0371651
GTEx	type 2 diabetes	B_DM	C2	CP_REACTOME	REACTOME_CA2_PATHWAY	0.0173714	0.0378142
GTEx	type 2 diabetes	B_DM	C2	CP_REACTOME	REACTOME_DUAL_INCISION_IN_TC_NER	0.0182068	0.0378142
GTEx	type 2 diabetes	B_DM	C2	CP_REACTOME	REACTOME_REGULATION_OF_INSULIN_SECRETION	0.0218215	0.0392787
GTEx	type 2 diabetes	B_DM	C2	CP_REACTOME	REACTOME_TRANSCRIPTION_COUPLED_NUCLEOTIDE_EXCISION_REPAIR_TC_NER	0.0218215	0.0392787
GTEx	type 2 diabetes	B_DM	C2	CP_REACTOME	REACTOME_OPIOID_SIGNALLING	0.0251502	0.0424409
GTEx	type 2 diabetes	B_DM	C2	CP_REACTOME	REACTOME_INTEGRATION_OF_ENERGY_METABOLISM	0.0301291	0.0460218
GTEx	type 2 diabetes	B_DM	C2	CP_REACTOME	REACTOME_NUCLEOTIDE_EXCISION_REPAIR	0.0306812	0.0460218
GTEx	type 2 diabetes	B_DM	C2	CP_REACTOME	REACTOME_BETA_CATENIN_INDEPENDENT_WNT_SIGNALING	0.0405843	0.0576725
GTEx	type 2 diabetes	B_DM	C2	CP_REACTOME	REACTOME_NEUROTRANSMITTER_RECEPTORS_AND_POSTSYNAPTIC_SIGNAL_TRANSMISSION	0.0566681	0.076502
GTEx	type 2 diabetes	B_DM	C2	CP_REACTOME	REACTOME_G_ALPHA_Q_SIGNALLING_EVENTS	0.0596468	0.0766887
GTEx	type 2 diabetes	B_DM	C2	CP_REACTOME	REACTOME_TRANSMISSION_ACROSS_CHEMICAL_SYNAPSES	0.0741784	0.0910371
GTEx	type 2 diabetes	B_DM	C2	CP_REACTOME	REACTOME_G_ALPHA_I_SIGNALLING_EVENTS	0.0859076	0.09736
GTEx	type 2 diabetes	B_DM	C2	CP_REACTOME	REACTOME_SIGNALING_BY_WNT	0.0898835	0.09736
GTEx	type 2 diabetes	B_DM	C2	CP_REACTOME	REACTOME_DNA_REPAIR	0.0901481	0.09736
GTEx	hypertension	B_HTN	C2	CP_REACTOME	REACTOME_SMOOTH_MUSCLE_CONTRACTION	0.000342714	0.019192
GTEx	hypertension	B_HTN	C2	CP_REACTOME	REACTOME_L1CAM_INTERACTIONS	0.00343037	0.0700437
GTEx	hypertension	B_HTN	C2	CP_REACTOME	REACTOME_ABACAVIR_METABOLISM	0.00375234	0.0700437
GTEx	hypertension	B_HTN	C2	CP_REACTOME	REACTOME_CHL1_INTERACTIONS	0.00674534	0.0794832
GTEx	hypertension	B_HTN	C2	CP_REACTOME	REACTOME_ABACAVIR_TRANSPORT_AND_METABOLISM	0.00749236	0.0794832
GTEx	hypertension	B_HTN	C2	CP_REACTOME	REACTOME_MUSCLE_CONTRACTION	0.00869137	0.0794832
GTEx	hypertension	B_HTN	C2	CP_REACTOME	REACTOME_PLATELET_ADHESION_TO_EXPOSED_COLLAGEN	0.0112201	0.0794832
GTEx	hypertension	B_HTN	C2	CP_REACTOME	REACTOME_PURINE_CATABOLISM	0.0127077	0.0794832
GTEx	hypertension	B_HTN	C2	CP_REACTOME	REACTOME_OTHER_SEMAPHORIN_INTERACTIONS	0.0141934	0.0794832
GTEx	hypertension	B_HTN	C2	CP_REACTOME	REACTOME_SIGNALING_BY_FLT3_FUSION_PROTEINS	0.0141934	0.0794832
GTEx	hypertension	B_HTN	C2	CP_REACTOME	REACTOME_NEPHRIN_FAMILY_INTERACTIONS	0.017159	0.0835292
GTEx	hypertension	B_HTN	C2	CP_REACTOME	REACTOME_CYTOSOLIC_TRNA_AMINOACYLATION	0.0178991	0.0835292
GTEx	hypertension	B_HTN	C2	CP_REACTOME	REACTOME_FLT3_SIGNALING_IN_DISEASE	0.0208549	0.0849862
GTEx	hypertension	B_HTN	C2	CP_REACTOME	REACTOME_LAMININ_INTERACTIONS	0.0223299	0.0849862
GTEx	hypertension	B_HTN	C2	CP_REACTOME	REACTOME_INTERACTION_BETWEEN_L1_AND_ANKYRINS	0.0230666	0.0849862
GTEx	hypertension	B_HTN	C2	CP_REACTOME	REACTOME_NUCLEOTIDE_CATABOLISM	0.0260088	0.0849862
GTEx	hypertension	B_HTN	C2	CP_REACTOME	REACTOME_STRIATED_MUSCLE_CONTRACTION	0.0267431	0.0849862
GTEx	hypertension	B_HTN	C2	CP_REACTOME	REACTOME_RHOV_GTPASE_CYCLE	0.0274769	0.0849862
GTEx	hypertension	B_HTN	C2	CP_REACTOME	REACTOME_RHOU_GTPASE_CYCLE	0.0296755	0.0849862
GTEx	hypertension	B_HTN	C2	CP_REACTOME	REACTOME_TRNA_AMINOACYLATION	0.0311389	0.0849862
GTEx	hypertension	B_HTN	C2	CP_REACTOME	REACTOME_SUMOYLATION_OF_TRANSCRIPTION_COFACTORS	0.0318698	0.0849862
GTEx	hypertension	B_HTN	C2	CP_REACTOME	REACTOME_SARS_COV_1_INFECTION	0.0369729	0.093691
GTEx	hypertension	B_HTN	C2	CP_REACTOME	REACTOME_RHOJ_GTPASE_CYCLE	0.0406035	0.093691
GTEx	hypertension	B_HTN	C2	CP_REACTOME	REACTOME_SENSORY_PROCESSING_OF_SOUND_BY_OUTER_HAIR_CELLS_OF_THE_COCHLEA	0.0406035	0.093691
GTEx	hypertension	B_HTN	C2	CP_REACTOME	REACTOME_RHO_GTPASE_CYCLE	0.0421496	0.093691
GTEx	hypertension	B_HTN	C2	CP_REACTOME	REACTOME_RHOQ_GTPASE_CYCLE	0.0434994	0.093691
GTEx	hypertension	B_HTN	C2	CP_REACTOME	REACTOME_NCAM_SIGNALING_FOR_NEURITE_OUT_GROWTH	0.0463876	0.094217
GTEx	hypertension	B_HTN	C2	CP_REACTOME	REACTOME_SEMAPHORIN_INTERACTIONS	0.0471085	0.094217
GTEx	hyperlipidemia	B_LIP	C2	CP_REACTOME	REACTOME_MHC_CLASS_II_ANTIGEN_PRESENTATION	0.0118354	0.0118354
GTEx	type 2 diabetes	B_DM	C2	CP_WIKIPATHWAYS	WP_CELLTYPE_DEPENDENT_SELECTIVITY_OF_CCK2R_SIGNALING	0.00502771	0.0327844
GTEx	type 2 diabetes	B_DM	C2	CP_WIKIPATHWAYS	WP_GPR40_PATHWAY	0.00618555	0.0327844
GTEx	type 2 diabetes	B_DM	C2	CP_WIKIPATHWAYS	WP_AIRWAY_SMOOTH_MUSCLE_CELL_CONTRACTION	0.0065713	0.0327844
GTEx	type 2 diabetes	B_DM	C2	CP_WIKIPATHWAYS	WP_PKCGAMMA_CALCIUM_SIGNALING_PATHWAY_IN_ATAXIA	0.00849854	0.0327844
GTEx	type 2 diabetes	B_DM	C2	CP_WIKIPATHWAYS	WP_S1P_RECEPTOR_SIGNAL_TRANSDUCTION	0.0100385	0.0327844
GTEx	type 2 diabetes	B_DM	C2	CP_WIKIPATHWAYS	WP_SPHINGOLIPID_METABOLISM_IN_SENESCENCE	0.0108079	0.0327844
GTEx	type 2 diabetes	B_DM	C2	CP_WIKIPATHWAYS	WP_GPR143_IN_MELANOCYTES_AND_RETINAL_PIGMENT_EPITHELIUM_CELLS	0.0115769	0.0327844
GTEx	type 2 diabetes	B_DM	C2	CP_WIKIPATHWAYS	WP_PROSTAGLANDIN_AND_LEUKOTRIENE_METABOLISM_IN_SENESCENCE	0.0119613	0.0327844
GTEx	type 2 diabetes	B_DM	C2	CP_WIKIPATHWAYS	WP_RESISTIN_AS_A_REGULATOR_OF_INFLAMMATION	0.0127297	0.0327844
GTEx	type 2 diabetes	B_DM	C2	CP_WIKIPATHWAYS	WP_ENDOTHELIN_PATHWAYS	0.0131137	0.0327844
GTEx	type 2 diabetes	B_DM	C2	CP_WIKIPATHWAYS	WP_KISSPEPTINKISSPEPTIN_RECEPTOR_SYSTEM_IN_THE_OVARY	0.015416	0.0350363
GTEx	type 2 diabetes	B_DM	C2	CP_WIKIPATHWAYS	WP_RENINANGIOTENSINALDOSTERONE_SYSTEM_RAAS	0.0169488	0.03531
GTEx	type 2 diabetes	B_DM	C2	CP_WIKIPATHWAYS	WP_PHOSPHOINOSITIDES_METABOLISM	0.0188626	0.0362742
GTEx	type 2 diabetes	B_DM	C2	CP_WIKIPATHWAYS	WP_AMPACTIVATED_PROTEIN_KINASE_AMPK_SIGNALING	0.0261123	0.042584
GTEx	type 2 diabetes	B_DM	C2	CP_WIKIPATHWAYS	WP_THYROID_STIMULATING_HORMONE_TSH_SIGNALING_PATHWAY	0.0261123	0.042584
GTEx	type 2 diabetes	B_DM	C2	CP_WIKIPATHWAYS	WP_NONGENOMIC_ACTIONS_OF_125_DIHYDROXYVITAMIN_D3	0.0272538	0.042584
GTEx	type 2 diabetes	B_DM	C2	CP_WIKIPATHWAYS	WP_NUCLEOTIDE_EXCISION_REPAIR_IN_XERODERMA_PIGMENTOSUM	0.0291541	0.0428737
GTEx	type 2 diabetes	B_DM	C2	CP_WIKIPATHWAYS	WP_THYROID_HORMONES_PRODUCTION_AND_PERIPHERAL_DOWNSTREAM_SIGNALING_EFFECTS	0.0363531	0.0498211
GTEx	type 2 diabetes	B_DM	C2	CP_WIKIPATHWAYS	WP_HIPPO_SIGNALING_REGULATION_PATHWAYS	0.0378641	0.0498211
GTEx	type 2 diabetes	B_DM	C2	CP_WIKIPATHWAYS	WP_WNT_SIGNALING	0.0446441	0.055383
GTEx	type 2 diabetes	B_DM	C2	CP_WIKIPATHWAYS	WP_FRAGILE_X_SYNDROME	0.0465217	0.055383
GTEx	type 2 diabetes	B_DM	C2	CP_WIKIPATHWAYS	WP_NEUROINFLAMMATION_AND_GLUTAMATERGIC_SIGNALING	0.0547542	0.0622207
GTEx	type 2 diabetes	B_DM	C2	CP_WIKIPATHWAYS	WP_CHEMOKINE_SIGNALING_PATHWAY	0.0625682	0.0680089
GTEx	hypertension	B_HTN	C2	CP_WIKIPATHWAYS	WP_DEREGULATION_OF_RAB_AND_RAB_EFFECTOR_GENES_IN_BLADDER_CANCER	0.0143772	0.0977168
GTEx	hypertension	B_HTN	C2	CP_WIKIPATHWAYS	WP_NOTCH1_REGULATION_OF_ENDOTHELIAL_CELL_CALCIFICATION	0.0161618	0.0977168
GTEx	hypertension	B_HTN	C2	CP_WIKIPATHWAYS	WP_NANOPARTICLEMEDIATED_ACTIVATION_OF_RECEPTOR_SIGNALING	0.0259278	0.0977168
GTEx	hypertension	B_HTN	C2	CP_WIKIPATHWAYS	WP_PHOTODYNAMIC_THERAPYINDUCED_UNFOLDED_PROTEIN_RESPONSE	0.0259278	0.0977168
GTEx	hypertension	B_HTN	C2	CP_WIKIPATHWAYS	WP_DISRUPTION_OF_POSTSYNAPTIC_SIGNALING_BY_CNV	0.0303393	0.0977168
GTEx	hypertension	B_HTN	C2	CP_WIKIPATHWAYS	WP_HEPATOCYTE_GROWTH_FACTOR_RECEPTOR_SIGNALING	0.0303393	0.0977168
GTEx	hypertension	B_HTN	C2	CP_WIKIPATHWAYS	WP_STRIATED_MUSCLE_CONTRACTION_PATHWAY	0.0338562	0.0977168
GTEx	hypertension	B_HTN	C2	CP_WIKIPATHWAYS	WP_TRYPTOPHAN_METABOLISM	0.0373622	0.0977168
GTEx	hypertension	B_HTN	C2	CP_WIKIPATHWAYS	WP_MIRNA_TARGETS_IN_ECM_AND_MEMBRANE_RECEPTORS	0.038237	0.0977168
GTEx	hyperlipidemia	B_LIP	C2	CP_WIKIPATHWAYS	WP_ALLOGRAFT_REJECTION	0.0114913	0.0169141
GTEx	hyperlipidemia	B_LIP	C2	CP_WIKIPATHWAYS	WP_EBOLA_VIRUS_INFECTION_IN_HOST	0.0169141	0.0169141

## Sheet: Table S9
Supplementary Table 9. Drug repurposing analysis results (Only significant)
Model	Phenotype	Phenotype_Coding	pert_id	Drug name	Mechanism of Action	Korean_tau	GTEx_tau
Both	periodontal disease	B_PER	BRD-A83237092	fulvestrant	estrogen receptor antagonist	-95.7656	-96.2287
Korean	gastric cancer	B_GCA	BRD-A37780065	triamcinolone	glucocorticoid receptor agonist	-90.6241	-80.0751
Korean	liver cancer	B_HCCCA	BRD-K06878038	deferiprone	chelating agent	-94.6969	-68.5171
Korean	colorectal cancer	B_COLCA	BRD-A94756469	digoxin	ATPase inhibitor	-91.4101	-39.187
Korean	colorectal cancer	B_COLCA	BRD-A68930007	ouabain	ATPase inhibitor	-91.6843	-28.2738
Korean	colorectal cancer	B_COLCA	BRD-K23478508	digoxin	ATPase inhibitor	-94.1615	-70.1941
Korean	colorectal cancer	B_COLCA	BRD-K35708212	ouabain	ATPase inhibitor	-93.7468	-63.654
Korean	thyroid cancer	B_THYCA	BRD-A94756469	digoxin	ATPase inhibitor	-93.1725	-53.2148
Korean	thyroid cancer	B_THYCA	BRD-K32977963	eugenol	androgen receptor antagonist	-95.2046	5.9549
Korean	thyroid cancer	B_THYCA	BRD-K91938660	memantine	glutamate receptor antagonist	-93.3165	-18.3357
Korean	thyroid cancer	B_THYCA	BRD-A75144621	digoxin	ATPase inhibitor	-97.7379	0
Korean	hypertension	B_HTN	BRD-K57080016	selumetinib	MEK inhibitor	-94.5431	-0.135779
Korean	type 2 diabetes	B_DM	BRD-K98490050	amsacrine	topoisomerase inhibitor	-91.7983	-41.0402
Korean	type 2 diabetes	B_DM	BRD-A65449987	flunisolide	cytochrome P450 inhibitor	-95.3271	0
Korean	hyperlipidemia	B_LIP	BRD-K15916496	clotrimazole	cytochrome P450 inhibitor|imidazoline receptor ligand	-90.6683	-74.1721
Korean	asthma	B_ASTH	BRD-K02130563	panobinostat	HDAC inhibitor	-98.0973	0
Korean	asthma	B_ASTH	BRD-K77554836	triamcinolone	glucocorticoid receptor agonist	-91.4262	0
Korean	angina	B_ANG	BRD-K27721098	clopidogrel	purinergic receptor antagonist	-91.0148	-88.4515
Korean	myocardial infarction	B_MI	BRD-K23369905	oxiconazole	bacterial cell wall synthesis inhibitor	-93.566	8.2488
Korean	valvular disease	B_VD	BRD-K79131256	albendazole	tubulin polymerization inhibitor	-93.8038	-0.17618
Korean	chronic pulmonary disease	B_CLD	BRD-K50388907	fenofibrate	PPAR receptor agonist	-93.7708	-80.5313
Korean	chronic pulmonary disease	B_CLD	BRD-A48570745	ivermectin	benzodiazepine receptor agonist	-90.9925	0
Korean	chronic pulmonary disease	B_CLD	BRD-A94543220	bifonazole	sterol demethylase inhibitor	-95.3776	-1.92896
Korean	chronic pulmonary disease	B_CLD	BRD-K86873305	piperacillin	bacterial cell wall synthesis inhibitor	-92.6723	-53.7908
Korean	tuberculosis	B_TB	BRD-A51393488	noscapine	bradykinin receptor antagonist|tubulin polymerization inhibitor	-90.3029	-31.4638
Korean	fracture	B_FRAC	BRD-K53414658	tivozanib	VEGFR inhibitor	-94.627	11.2692
Korean	gastritis, gastric/duodenal ulcer	B_STOMUL	BRD-A48430263	pioglitazone	insulin sensitizer|PPAR receptor agonist	-91.2209	-2.07893
Korean	chronic gastritis	B_GASTRO	BRD-K99260425	etodolac	cyclooxygenase inhibitor	-94.4097	-4.86258
Korean	head trauma	B_HN	BRD-A35588707	teniposide	topoisomerase inhibitor	-90.3147	-2.11416
Korean	cystitis (urinary tract infection)	B_UB	BRD-A09539288	homatropine	acetylcholine receptor antagonist	-90.0217	18.8583
Korean	transient ischemic attack (TIA)	B_TIA	BRD-A83237092	fulvestrant	estrogen receptor antagonist	-95.0216	-18.9385
Korean	acute liver disease	B_LIV	BRD-K82255054	propofol	benzodiazepine receptor agonist	-94.7234	-11.0487
Korean	fatty liver	B_FLIV	BRD-K81418486	vorinostat	HDAC inhibitor	-98.2861	-2.67794
Korean	fatty liver	B_FLIV	BRD-K02130563	panobinostat	HDAC inhibitor	-95.7717	-1.16279
Korean	fatty liver	B_FLIV	BRD-K17743125	belinostat	HDAC inhibitor	-98.203	-9.18468
Korean	gallstones	B_GB	BRD-K30097969	pitavastatin	HMGCR inhibitor	-94.5097	-10.3845
Korean	gallstones	B_GB	BRD-K78431006	crizotinib	ALK tyrosine kinase receptor inhibitor	-90.001	-0.140944
Korean	periodontal disease	B_PER	BRD-A71390734	idarubicin	topoisomerase inhibitor	-92.4054	-79.4011
Korean	periodontal disease	B_PER	BRD-K72093121	vidarabine	antiviral	-94.3832	-5.72563
Korean	periodontal disease	B_PER	BRD-K37798499	etoposide	topoisomerase inhibitor	-92.8825	-81.3866
Korean	chronic hepatitis C	B_HEPATITISC	BRD-K02130563	panobinostat	HDAC inhibitor	-95.1727	9.74302
Korean	prostate cancer	B_PROCA	BRD-K88560311	rucaparib	PARP inhibitor	-92.8681	-1.7618
Korean	prostate cancer	B_PROCA	BRD-K83144676	olmesartan	angiotensin receptor antagonist	-90.8459	-1.34919
Korean	prostate hyperplasia	B_BPH	BRD-A29260609	acebutolol	adrenergic receptor antagonist	-95.2323	-14.9936
Korean	prostate hyperplasia	B_BPH	BRD-K23204545	busulfan	DNA inhibitor	-92.1879	16.0218
Korean	prostate hyperplasia	B_BPH	BRD-K46137903	prednicarbate	phospholipase activator	-96.6878	-9.56781
Korean	prostate hyperplasia	B_BPH	BRD-A20126139	medrysone	glucocorticoid receptor agonist	-90.0822	-2.04369
GTEx	lung cancer	B_LCA	BRD-A81772229	simvastatin	HMGCR inhibitor	0	-95.1022
GTEx	colorectal cancer	B_COLCA	BRD-K03406345	azacitidine	DNA methyltransferase inhibitor	0	-93.6927
GTEx	colorectal cancer	B_COLCA	BRD-M30523314	vinorelbine	tubulin polymerization inhibitor	-75.5684	-93.24
GTEx	thyroid cancer	B_THYCA	BRD-K77987382	mebendazole	tubulin polymerization inhibitor	-9.23508	-90.0272
GTEx	thyroid cancer	B_THYCA	BRD-A76528577	vincristine	tubulin polymerization inhibitor	-12.9973	-91.2105
GTEx	hypertension	B_HTN	BRD-M30523314	vinorelbine	tubulin polymerization inhibitor	-85.4458	-95.8707
GTEx	type 2 diabetes	B_DM	BRD-K06878038	deferiprone	chelating agent	-45.9364	-99.1191
GTEx	type 2 diabetes	B_DM	BRD-A83237092	fulvestrant	estrogen receptor antagonist	-0.739958	-90.554
GTEx	thyroid disease	B_THY	BRD-K79131256	albendazole	tubulin polymerization inhibitor	15.7346	-90.6033
GTEx	hyperlipidemia	B_LIP	BRD-K42125900	docetaxel	tubulin polymerization inhibitor	-39.9879	-90.1206
GTEx	asthma	B_ASTH	BRD-A68930007	ouabain	ATPase inhibitor	-85.4705	-93.2099
GTEx	asthma	B_ASTH	BRD-M30523314	vinorelbine	tubulin polymerization inhibitor	-73.1901	-94.4926
GTEx	coronary artery disease	B_CAD	BRD-A10070317	propranolol	adrenergic receptor antagonist	-6.20155	-92.4908
GTEx	angina	B_ANG	BRD-M00539986	formoterol	adrenergic receptor agonist	14.1769	-90.0829
GTEx	angina	B_ANG	BRD-K42125900	docetaxel	tubulin polymerization inhibitor	95.2124	-90.3736
GTEx	myocardial infarction	B_MI	BRD-A10070317	propranolol	adrenergic receptor antagonist	-6.65962	-90.3165
GTEx	myocardial infarction	B_MI	BRD-K31484631	rifabutin	protein synthesis inhibitor	-8.09346	-91.871
GTEx	arrhythmia	B_ARRHY	BRD-K97514127	vinorelbine	tubulin polymerization inhibitor	-65.614	-95.5364
GTEx	arrhythmia	B_ARRHY	BRD-K10916986	vinorelbine	tubulin polymerization inhibitor	-17.903	-95.8774
GTEx	valvular disease	B_VD	BRD-K79425933	benperidol	dopamine receptor antagonist	-14.9762	-92.2455
GTEx	heart failure	B_CHF	BRD-A09539288	homatropine	acetylcholine receptor antagonist	-12.3219	-90.504
GTEx	heart failure	B_CHF	BRD-K14888893	minoxidil	KATP activator|Kir6 channel (KATP) activator|vasodilator	-13.0314	-99.1543
GTEx	heart failure	B_CHF	BRD-A67981824	cefotaxime	bacterial cell wall synthesis inhibitor	-39.5335	-90.8811
GTEx	kidney disease	B_KD	BRD-K93331255	lypressin	vasopressin receptor agonist	0	-94.4382
GTEx	chronic pulmonary disease	B_CLD	BRD-K31283835	tofacitinib	JAK inhibitor	-9.93657	-91.7543
GTEx	chronic pulmonary disease	B_CLD	BRD-A67981824	cefotaxime	bacterial cell wall synthesis inhibitor	-4.47498	-91.7949
GTEx	tuberculosis	B_TB	BRD-K06878038	deferiprone	chelating agent	-44.7111	-92.6267
GTEx	fracture	B_FRAC	BRD-K79602928	metformin	insulin sensitizer	0	-96.2543
GTEx	fracture	B_FRAC	BRD-K89152108	liothyronine	thyroid hormone stimulant	0	-91.5611
GTEx	fracture	B_FRAC	BRD-A14798026	mestranol	estrogen receptor agonist	-1.79704	-92.0734
GTEx	fracture	B_FRAC	BRD-M30523314	vinorelbine	tubulin polymerization inhibitor	-6.62457	-95.1727
GTEx	chronic gastritis	B_GASTRO	BRD-M30523314	vinorelbine	tubulin polymerization inhibitor	-74.8849	-93.1491
GTEx	peripheral vascular disease	B_PV	BRD-M30523314	vinorelbine	tubulin polymerization inhibitor	-6.86944	-90.2566
GTEx	cerebrovascular disease	B_CVA	BRD-K18895904	olanzapine	dopamine receptor antagonist|serotonin receptor antagonist	5.81395	-92.4192
GTEx	head trauma	B_HN	BRD-K81418486	vorinostat	HDAC inhibitor	0	-96.5821
GTEx	head trauma	B_HN	BRD-K02130563	panobinostat	HDAC inhibitor	0	-95.2784
GTEx	head trauma	B_HN	BRD-K17743125	belinostat	HDAC inhibitor	0	-90.8749
GTEx	cystitis (urinary tract infection)	B_UB	BRD-K61341215	vecuronium	acetylcholine receptor antagonist	-4.96829	-99.8943
GTEx	gout	B_GT	BRD-A55594068	vinblastine	microtubule inhibitor|tubulin polymerization inhibitor	-12.5536	-90.0066
GTEx	gout	B_GT	BRD-K10916986	vinorelbine	tubulin polymerization inhibitor	-69.6498	-94.8952
GTEx	gout	B_GT	BRD-M30523314	vinorelbine	tubulin polymerization inhibitor	-5.47461	-91.8979
GTEx	transient ischemic attack (TIA)	B_TIA	BRD-A65013509	oxybutynin	acetylcholine receptor antagonist	15.039	-98.1677
GTEx	acute liver disease	B_LIV	BRD-K71499074	diclofenamide	carbonic anhydrase inhibitor	-0.246653	-93.9184
GTEx	acute liver disease	B_LIV	BRD-K82795137	loratadine	histamine receptor antagonist	-0.946898	-93.0311
GTEx	fatty liver	B_FLIV	BRD-K84937637	sirolimus	mTOR inhibitor	-2.60747	-91.9491
GTEx	gallstones	B_GB	BRD-A93236127	digitoxin	ATPase inhibitor	-9.39774	-92.0765
GTEx	gallstones	B_GB	BRD-A94756469	digoxin	ATPase inhibitor	-0.739958	-91.7572
GTEx	gallstones	B_GB	BRD-A68930007	ouabain	ATPase inhibitor	-23.9241	-91.8649
GTEx	gallstones	B_GB	BRD-K23478508	digoxin	ATPase inhibitor	-16.9696	-91.4611
GTEx	gallstones	B_GB	BRD-A10715913	sulpiride	dopamine receptor antagonist	-44.9859	-95.0766
GTEx	gallstones	B_GB	BRD-A75144621	digoxin	ATPase inhibitor	0	-93.5166
GTEx	arthritis	B_ARTH	BRD-K37798499	etoposide	topoisomerase inhibitor	-32.1369	-94.0766
GTEx	cataract	B_CATA	BRD-K89152108	liothyronine	thyroid hormone stimulant	-73.4162	-96.7008
GTEx	periodontal disease	B_PER	BRD-K15108141	gemcitabine	ribonucleotide reductase inhibitor	-48.9773	-90.1423
GTEx	periodontal disease	B_PER	BRD-K28912512	nicotinamide	protein synthesis stimulant	-5.56773	-94.5185
GTEx	periodontal disease	B_PER	BRD-K32977963	eugenol	androgen receptor antagonist	-13.6894	-97.6458
GTEx	periodontal disease	B_PER	BRD-A41250306	cyclopenthiazide	thiazide diuretic	1.40944	-92.7524
GTEx	periodontal disease	B_PER	BRD-K90733503	cephalexin	bacterial cell wall synthesis inhibitor	3.66455	-92.2502
GTEx	periodontal disease	B_PER	BRD-K91938660	memantine	glutamate receptor antagonist	25.9159	-97.1847
GTEx	liver cirrhosis	B_CIRRHOSIS	BRD-K31534764	fluvoxamine	selective serotonin reuptake inhibitor (SSRI)	0	-98.2235
GTEx	liver cirrhosis	B_CIRRHOSIS	BRD-A31374339	fludarabine	ribonucleotide reductase inhibitor	-0.634249	-93.9557
GTEx	chronic hepatitis B	B_HEPATITISB	BRD-K72093121	vidarabine	antiviral	-4.22833	-97.1106
GTEx	chronic hepatitis B	B_HEPATITISB	BRD-K39983086	loteprednol	glucocorticoid receptor agonist|phospholipase inhibitor	4.40451	-91.102
GTEx	prostate cancer	B_PROCA	BRD-K32318651	acyclovir	DNA polymerase inhibitor	0	-92.2481
GTEx	breast cancer	B_BRCA	BRD-K57545991	enalapril	angiotensin converting enzyme inhibitor	-10.2689	-90.3823
GTEx	smoking status	B_SMOKE	BRD-K63265447	docetaxel	tubulin polymerization inhibitor	-87.3595	-90.2984
